# Supplementary material
Source: publisher figshare collection journal article supplement (https://future-science-group.figshare.com/ndownloader/files/31605857)
Supplement: Supplementary file 1 [file 31605857]

## Sheet: Supp. Table 1a
Supplementary Table 1a: Top 1000 probes in buccal of male offspring
Row.names	logFC	AveExpr	t	P.Value	adj.P.Val	B	chr	pos	strand	AddressA	AddressB	ProbeSeqA	ProbeSeqB	Type	NextBase	Color	Probe_rs	Probe_maf	CpG_rs	CpG_maf	SBE_rs	SBE_maf	Islands_Name	Relation_to_Island	Forward_Sequence	SourceSeq	Random_Loci	Methyl27_Loci	UCSC_RefGene_Name	UCSC_RefGene_Accession	UCSC_RefGene_Group	Phantom	DMR	Enhancer	HMM_Island	Regulatory_Feature_Name	Regulatory_Feature_Group	DHS	mean_case	mean_cont	absolutedeltabeta	rankedbyunadjustedP	rankedbydb	totalrank
cg06491590	1.02567	0.356984	4.35882	3.86206e-05	0.993103	0.883873	chr7	4855406	+	35796438		CTACAAAACTCAAAAACACTAACCACTCCCAACCAAAACCACTATAAAAC		II			rs1387561	0.275091	NA	NA	NA	NA	chr7:4855990-4856212	N_Shore	GGACCCTCTCCCACTCCCAGACACATGTGCCGGGGGCCTGCCCCCACCTGGGTCTCCCCA[CG]CCCCACAGTGGCCCTGGCTGGGAGTGGCCAGTGCTCCTGAGCCCTGCAGGTGATGGGGGA	CGCCCCACAGTGGCCCTGGCTGGGAGTGGCCAGTGCTCCTGAGCCCTGCA			RADIL	NM_018059	Body								0.617317	0.454771	0.162546	12	1	13
cg20461188	-0.615168	-1.8689	-4.15799	8.02341e-05	0.993103	0.396186	chr10	102322354	-	61671349	66647336	AAAACAAAATAACAACCACATTCAAAAACACTAAAACAAAAAATCAAACA	AAAACAAAATAACGACCACGTTCGAAAACACTAAAACGAAAAATCGAACG	I	T	Red	NA	NA	NA	NA	NA	NA	chr10:102321832-102322395	Island	CCTTCGCTGTTCAAAGCAGAGTGGCGGCCACGTTCGGGGGCACTGGGGCGAGGGGTCGGG[CG]TCGGACGGGGCCCTGGGTCTGTACCGTTTCGGGCTCGCCGGAGGGGCTGCAGGCAGGGCG	CGCCCGACCCCTCGCCCCAGTGCCCCCGAACGTGGCCGCCACTCTGCTTT								TRUE	10:102311823-102312692	10:102321573-102323327	Unclassified_Cell_type_specific		0.19689	0.27474	0.0778502	29	6	35
cg26389950	0.278831	-0.781975	4.53156	2.02952e-05	0.993103	1.31238	chr5	140562236	-	54600485		TTATTTTACTAAACTTATCTAAAACRAACRCCRAATTAAAATCCTATTCC		II			NA	NA	NA	NA	NA	NA	chr5:140563510-140564361	N_Shore	CCTTGTTTTCTTTGTTTTGCTGAGCTTGTCTGGGGCGGGCGCCGAGTTGGGGTCCTATTC[CG]TAGTGGAAGAAACGGAGAGAGGCTCTTTTGTGGCAAATCTAGGAAAAGACCTGGGGTTGG	CGGAATAGGACCCCAACTCGGCGCCCGCCCCAGACAAGCTCAGCAAAACA			PCDHB16	NM_020957	1stExon		RDMR		5:140542395-140542435			TRUE	0.385209	0.340433	0.0447761	5	41	46
cg02644072	-0.581205	-1.20118	-4.08055	0.000105823	0.993103	0.21141	chr5	50264156	-	69757366		AAAATCTCACCAAAACTCACCTTAATACTAATCAAAACTACTCRATACAC		II			NA	NA	NA	NA	NA	NA	chr5:50265085-50265737	N_Shore	TGGAAATGATAAAAATCTCACCAAAGCTCACCTTGGTGCTAATCAAGACTGCTCGATGCA[CG]TTATAAATCTGATACAATATTTATTGCTTATCTGTATTCGAGGGGTTAGTCTCCATCCTA	CGTGCATCGAGCAGTCTTGATTAGCACCAAGGTGAGCTTTGGTGAGATTT							CDMR						0.281161	0.363606	0.0824445	45	5	50
cg23759393	0.291088	0.478229	4.40748	3.22614e-05	0.993103	1.00377	chr7	158110405	-	31683399	31657389	ATTAATTCAAACACTACTACTTCCACACAAAACAACCATCTACAACTTCA	ATTAATTCAAACGCTACTACTTCCACACAAAACGACCATCTACAACTTCG	I	A	Red	NA	NA	NA	NA	NA	NA	chr7:158110569-158110881	N_Shore	TGCACACAAAAGGTTAATTCAGGCGCTACTGCTTCCACACAGGGCGGCCATCTGCAGCTT[CG]GGCGGGGCGGAAGGGGAAATGGTCTCTTTTATTGTTCACTAGGTTTCGCCGTGCAGCTTG	GTTAATTCAGGCGCTACTGCTTCCACACAGGGCGGCCATCTGCAGCTTCG			PTPRN2;PTPRN2;PTPRN2	NM_002847;NM_130842;NM_130843	Body;Body;Body			TRUE	7:157803150-157803687				0.59691	0.553873	0.0430366	7	51	58
cg25597797	0.353929	0.307179	3.9563	0.000163984	0.999978	-0.0810377	chr19	3589762	-	67664344		TACTAACTCRTATAAAAATCCAATCTACTCTTCCCTTAAAAATAAAAATC		II			NA	NA	NA	NA	NA	NA	chr19:3585357-3585947	S_Shelf	GGTACCAGCACTACTGACTCGTGTGAGGGTCCAGTCTACTCTTCCCTTAGGGGTGGGGGT[CG]GGAGGGGGCTGGGCTGGAGGGCTCCAAAGCTTTTCACCCCTGACTTCCCTCCCGTGTGCC	ACTGACTCGTGTGAGGGTCCAGTCTACTCTTCCCTTAGGGGTGGGGGTCG			GIPC3	NM_133261	Body					19:3589687-3589767	Unclassified_Cell_type_specific		0.571455	0.517112	0.054343	58	25	83
cg23722437	0.311886	1.4601	3.9815	0.000150139	0.999978	-0.0221392	chr11	13983009	+	50706360		ATACCCTCAAAAACTTTAATTTCCTCRTCTTCTCTTTACCCAAAACCTTC		II			rs114313596	0.011295	NA	NA	NA	NA	chr11:13984066-13986349	N_Shore	AAAACCCTGACCTGGAAAGCAAAGGAGATTGCTTGCTAATTGTAGGCACTTGAGGTGTGT[CG]AAGGCCCTGGGCAAAGAGAAGACGAGGAAACCAAAGCTTCTGAGGGCACCTGGGGAGGGA	TGCCCTCAGAAGCTTTGGTTTCCTCGTCTTCTCTTTGCCCAGGGCCTTCG			SPON1	NM_006108	TSS1500								0.746394	0.702921	0.0434722	54	46	100
cg24785473	0.249155	0.576192	4.15144	8.21435e-05	0.993103	0.38049	chr3	35681883	-	34676367		TAAATCAAACCAATCAAAACACCAAAACRCAAAAAAAATATCCACAATTC		II			NA	NA	NA	NA	NA	NA	chr3:35680509-35681628	S_Shore	AAATCCAAAACTAAATCAAACCAATCAAGGCACCAAGACGCAGGGGGGATATCCACAGTT[CG]ATCAAGGTAATAATCAAGGTCTTCCGACGTGAACATTGCACGCCTTTTGTGGATTTTTAG	CGAACTGTGGATATCCCCCCTGCGTCTTGGTGCCTTGATTGGTTTGATTT													0.612101	0.572476	0.0396243	32	73	105
cg06623778	-0.401951	-0.486421	-3.75448	0.000328469	0.999978	-0.544844	chr1	848409	-	48748406		CAAAAAATAACAAATCCAACRCTCCTACTTAAAACAACRTAAAAACCAAC		II			NA	NA	NA	NA	NA	NA	chr1:844299-845883	S_Shelf	ACCGTTAACGTCAGGAAATGACAGATCCAACGCTCCTGCTTGGGGCAGCGTGGAGGCCAG[CG]GAGGAACTGCAGGAGCCTAAAGGAGATGGCGCGCGGGCCTGGCTCAGGAGAGCAGCCGTC	CGCTGGCCTCCACGCTGCCCCAAGCAGGAGCGTTGGATCTGTCATTTCCT									1:838242-838308			TRUE	0.395439	0.458592	0.0631531	106	19	125
cg07173635	-0.567964	-1.539	-3.72697	0.00036049	0.999978	-0.606932	chr9	971480	-	23681480		AATAAAAATATACAACCCCCTCCRCTCCACTTAAACTTTAATACTAAACC		II			NA	NA	NA	NA	NA	NA	chr9:969529-973276	Island	AAATAAATAGAAATAAAAATATGCAGCCCCCTCCGCTCCACTTGAACTTTAATGCTGAAC[CG]GTTTCCCACGTATACGTGTATCGCACCGCATTTTGACGCTTTGCATCGAGTCGCATTAAT	CGGTTCAGCATTAAAGTTCAAGTGGAGCGGAGGGGGCTGCATATTTTTAT							RDMR		9:961480-962401				0.239673	0.312823	0.0731501	117	8	125
cg20248056	0.319424	-0.768316	3.78425	0.000296873	0.999978	-0.477334	chr13	113704976	-	11686451	47627407	AAAAAAACTCACCATAAAAACAATAAAAACAATAAAAACCATAAAAACCA	AAAAAAACTCACCGTAAAAACGATAAAAACGATAAAAACCGTAAAAACCG	I	A	Red	NA	NA	NA	NA	NA	NA	chr13:113705500-113705778	N_Shore	CTGGGGCTCTGGGGAGGAGCTCACCGTGGGGGCGGTGGGGGCGGTGGGAGCCGTGGGGGC[CG]GGGCGGTGGAGGGGGGGGTGGCTGGGGGAGCGGGGAGGCGGGAGGAGCAGGGGGGGCGGG	CGGCCCCCACGGCTCCCACCGCCCCCACCGCCCCCACGGTGAGCTCCTCC			MCF2L;MCF2L	NM_001112732;NM_024979	Body;Body			TRUE	13:112752787-112753977				0.390221	0.340302	0.0499186	97	30	127
cg23733394	-0.727617	-1.96592	-3.71201	0.000379131	0.999978	-0.64058	chr1	839752	-	35610394		AAACAAATAACAACCCCTTAAACRCAAACTCAAAACRCCAAAATCAAAAC		II			NA	NA	NA	NA	NA	NA	chr1:839694-840619	Island	GGGCGGCATCGGGGCAGGTGGCAACCCCTTGGACGCAGGCTCAGGACGCCAGGGTCAGGG[CG]TGAGTGCCGGGGCCCCCTCAAAGCCGCGGGGTCCAAAGAGGCCGCCGGCCCCGGCCCCGC	CGCCCTGACCCTGGCGTCCTGAGCCTGCGTCCAAGGGGTTGCCACCTGCC									1:829455-830943				0.183976	0.28868	0.104704	126	2	128
cg21597304	-0.243406	0.454758	-3.93467	0.00017684	0.999978	-0.131433	chr15	27021321	-	38717356		TTACCTTATCCATATTTATACATTTTCATTAACCCAAATACCTTTTACCC		II			NA	NA	NA	NA	NA	NA	chr15:27016892-27018943	S_Shelf	AGGTGATCACGTTACCTTATCCATGTTTGTGCATTTTCATTGACCCAAATGCCTTTTACC[CG]AACTATTTTGTTCAGTCACTCTTCTTTTAGAAAACTTGTTTTTTTAAACAGTATCAAAAT	CGGGTAAAAGGCATTTGGGTCAATGAAAATGCACAAACATGGATAAGGTA							CDMR						0.562764	0.603048	0.040284	62	68	130
cg27304549	0.237457	1.15438	4.00276	0.000139338	0.999978	0.0277152	chr1	17973490	-	34718447		AAAAAACRACRAAACCAAATATAAATTTTAACAAAATAAACCTAACTACC		II			NA	NA	NA	NA	NA	NA		OpenSea	GTTTCCAAGCAGGGGAACGGCGAGGCCAGGTGTAAGTTTTAGCAGGATGGGCCTGGCTGC[CG]AGCAAAGATGACTGTAGTGTCAGGGGGCCCCAGTGTGGCTGGCGGGAACTCTCCGGCTGA	CGGCAGCCAGGCCCATCCTGCTAAAACTTACACCTGGCCTCGCCGTTCCC			ARHGEF10L;ARHGEF10L	NM_001011722;NM_018125	Body;Body				1:17845851-17846241				0.702701	0.663746	0.038955	49	84	133
cg23245905	0.297308	0.847517	3.79915	0.000282176	0.999978	-0.443439	chr10	99735133	-	45668364		RATTCCTAACCCRCCTCCTAACTAAAAAATTCAAAAAACTTCAAACCTCC		II			NA	NA	NA	NA	NA	NA		OpenSea	GCGCCAGGGCCGGTTCCTGACCCGCCTCCTGGCTGGAGGGTTCAAAAGACTTCAGACCTC[CG]GGGCCCTGTGCACAGAGATGCTGGCTGCATGGGGCGTGGAGGGGCGGGATGGGGAGCCGG	GTTCCTGACCCGCCTCCTGGCTGGAGGGTTCAAAAGACTTCAGACCTCCG			CRTAC1	NM_018058	Body				10:99724988-99725193				0.657214	0.612302	0.0449116	94	40	134
cg10852003	-0.293788	1.36941	-3.95754	0.000163277	0.999978	-0.0781497	chr17	77761664	+	56635397		TAATTCAAAACTTAATCCTCCCCTAAAATCTCCCCTTAATAAAAACTCTC		II			NA	NA	NA	NA	NA	NA	chr17:77763364-77767356	N_Shore	AGAGTGTTCCTTGTTTTGGTTACACTCGAAATTCTGACCTAGCTGGAGAGGGCTCTGGGC[CG]AGAGCTTTCACTAAGGGGAGACTTCAGGGGAGGATCAAGCTTTGAACCAAAGCCAATCAC	GGTTCAAAGCTTGATCCTCCCCTGAAGTCTCCCCTTAGTGAAAGCTCTCG								TRUE					0.704336	0.743554	0.0392177	57	79	136
cg22163972	0.243335	1.48642	4.37169	3.68301e-05	0.993103	0.915512	chr17	77537086	+	72758439		ATTATAACRCTAATATCTCRTCTATAACTACTAAAACTCRACAAACACTC		II			NA	NA	NA	NA	NA	NA		OpenSea	TTCTTGAGGCCTGGGGGGATCTGCAGGCCCAAGTATCCTCCGAGGAACTGCTGCTTAACC[CG]AGTGCTTGTCGAGCCTCAGCAGCCACAGACGAGACATTAGCGTTACAACCCACACTGATC	TTGTAACGCTAATGTCTCGTCTGTGGCTGCTGAGGCTCGACAAGCACTCG									17:75048551-75048693				0.747784	0.714087	0.0336966	10	131	141
cg01089319	-0.335246	-0.823949	-3.74425	0.000340043	0.999978	-0.567959	chr2	171676809	+	46751509	47617432	ACTTTAACAACTTCCAAACAAACCAAACCACATACAAATTCAAATCATCA	GCTTTAACAACTTCCAAACGAACCAAACCACGTACGAATTCAAATCATCG	I	C	Grn	NA	NA	NA	NA	NA	NA	chr2:171676552-171676980	Island	CCCGGTGGCCGCCAGTCGCCGGCGCAAATGCCAAGTCACCGGTAGGAGACACAACAGAGG[CG]ATGACCTGAATCCGCACGTGGCCTGGTTCGCCTGGAAGCTGCCAAAGCGAAGGCAAGAGA	GCTTTGGCAGCTTCCAGGCGAACCAGGCCACGTGCGGATTCAGGTCATCG			GAD1;GAD1	NM_000817;NM_013445	Body;Body		RDMR		2:171384759-171385226				0.346446	0.393941	0.0474949	109	35	144
cg22122862	0.208157	-0.496571	4.2919	4.93774e-05	0.993103	0.720058	chr1	2987914	-	64674505		ATCCRCTCAAAACCAAAAATAATACCTAACAACCATCTAACCAAAAAACC		II			rs909510	0.343039	NA	NA	NA	NA	chr1:2983925-2987962	Island	CCCGGGACCGGGTCCGCTCAGGACCAGAAGTGGTGCCTGGCAGCCATCTGGCCAGGAGGC[CG]GAGAGCCGGGCCCAGCGGGAGCGCCGAGCGCTGGCTTCCTTTTCCCGAGAGTCTTTAGTG	CGGCCTCCTGGCCAGATGGCTGCCAGGCACCACTTCTGGTCCTGAGCGGA			PRDM16;PRDM16	NM_022114;NM_199454	Body;Body				1:2973786-2977805				0.427065	0.394545	0.0325197	16	144	160
cg10646633	0.416307	-2.33208	3.87972	0.000213975	0.999978	-0.258713	chr19	44598471	-	62797421	72613313	TATAATCCAAACACTCAATAAAATCACAATCAATTTAACTCCAACTAACA	TATAATCCAAACGCTCAATAAAATCGCGATCAATTTAACTCCGACTAACG	I	A	Red	rs8106828	0.168339	NA	NA	NA	NA	chr19:44598374-44598854	Island	AATTCTGGGAAGTGTAGTCCAGACGCTCAGTGGAGTCGCGGTCAGTTTGGCTCCGGCTGG[CG]GGTCCCGGGGAATTCTGGGAAGTGGAGTCCAAACATTCGGTGGAGTCGCGGACACTTCCG	TGTAGTCCAGACGCTCAGTGGAGTCGCGGTCAGTTTGGCTCCGGCTGGCG			ZNF224	NM_013398	TSS200				19:49290096-49291195	19:44597972-44599764	Promoter_Associated		0.184787	0.146535	0.038252	74	91	165
cg11564981	0.333544	-2.06889	4.04385	0.000120537	0.999978	0.124491	chr6	6007670	+	21670300	61781487	ATAAACAAACACAAAAAACAAACAACCAAAAAACACTTTCAAATTAATCA	ATAAACAAACGCAAAAAACGAACGACCGAAAAACGCTTTCGAATTAATCG	I	A	Red	NA	NA	NA	NA	NA	NA	chr6:6007387-6007797	Island	GCTCTCTACGATGCAGGGGGGTTTAAAGGAGCGGGAGAGGGAAAAACAGCTAAGCTAGCT[CG]ATTAATTCGAAAGCGCTCCTCGGCCGCCCGCCCCCTGCGCTTGCCTACCCTCTTTTTCTC	GTAGGCAAGCGCAGGGGGCGGGCGGCCGAGGAGCGCTTTCGAATTAATCG			NRN1	NM_016588	TSS200			TRUE	6:5952437-5953263				0.207992	0.174048	0.0339447	47	125	172
cg26796283	0.484764	-3.00836	4.12676	8.97424e-05	0.993103	0.321437	chr5	174151334	-	62763385	61638344	CACTTTAAATAATCACTCTTAATTAAATCTCAAACTTTTCAATTTCAACA	CGCTTTAAATAATCGCTCTTAATTAAATCTCGAACTTTTCAATTTCGACG	I	T	Red	NA	NA	NA	NA	NA	NA	chr5:174151478-174152364	N_Shore	TCGGCGAACTTCCGCTTTAAATAATCGCTCTTAATTAGGTCTCGGGCTTTTCAGTTTCGG[CG]TGATTATAACCCTTCAGGGATCGCCTAATAACAACTCTGCTGACTGCTCCTGTAATTAAC	CGCCGAAACTGAAAAGCCCGAGACCTAATTAAGAGCGATTATTTAAAGCG		TRUE	MSX2	NM_002449	TSS1500					5:174151012-174151637	Unclassified_Cell_type_specific		0.128046	0.0948969	0.033149	37	138	175
cg11403823	0.208517	0.995942	4.08098	0.000105663	0.993103	0.212421	chr7	66856314	-	14626397	31749432	TTATTTAAAACTCTTCCCTACCACCTCCTTCTATTATACATAACATCCCA	TTATTTAAAACTCTTCCCTACCGCCTCCTTCTATTATACGTAACATCCCG	I	A	Red	rs80104064	0.016073	NA	NA	NA	NA		OpenSea	GACACTTCTTGCTTGTTTGAAGCTCTTCCCTGCCGCCTCCTTCTGTTGTACGTGACATCC[CG]ACTGGGAACACGCGAAACAACAGCTGATGCTGTCAGTGGGACGGCCGCCTCTCCGCCGTG	CGGGATGTCACGTACAACAGAAGGAGGCGGCAGGGAAGAGCTTCAAACAA									7:66493722-66493816				0.677371	0.64368	0.0336908	44	132	176
cg15088000	0.426775	-2.77854	4.24859	5.78243e-05	0.993103	0.614733	chr19	40724308	+	34700420	70712391	AAAAAATAAAAACCAACCCCACAAAAAACAATACAATAACTACAACAACA	AAAAAATAAAAACCAACCCCGCGAAAAACGATACGATAACTACAACGACG	I	A	Red	NA	NA	NA	NA	NA	NA	chr19:40723104-40724389	Island	GCGCTGAGCATCAGCACCGGGGACAGCGCGCCGCGCTGCATTGTGGGAAACTCCTGCCGC[CG]CCGCTGCAGCTACCGCATCGCCCCCCGCGGGGCTGGTCCCCACCCTTTCTCCGCCCCCTC	AAAGGGTGGGGACCAGCCCCGCGGGGGGCGATGCGGTAGCTGCAGCGGCG			TTC9B	NM_152479	TSS200	high-CpG:45416102-45416165			19:45415669-45416229	19:40723807-40724477	Unclassified_Cell_type_specific	TRUE	0.1427	0.111564	0.0311353	19	164	183
cg15657270	-0.320265	2.05158	-4.06927	0.000110152	0.999978	0.184644	chr10	104734496	-	60667441		TACCTAACCAACTTTTAAAATTTTTTTCATACAAACAAAATCTCACCATC		II			NA	NA	NA	NA	NA	NA		OpenSea	ACACACTACTGTGCCTGGCCAACTTTTAAAATTTTTTTCATACAGGCAGGGTCTCACCAT[CG]AGCCCAGGCTGGTCTTGAACTCCTGGGCTCAAGCAGTCCTCCCGCCTTGGCCTCCCAAAG	GCCTGGCCAACTTTTAAAATTTTTTTCATACAGGCAGGGTCTCACCATCG			CNNM2;CNNM2	NM_199076;NM_017649	Body;Body			TRUE					0.790746	0.823744	0.0329984	46	140	186
cg14653390	0.227561	0.940422	3.88277	0.000211735	0.999978	-0.251687	chr1	2930315	+	61761419		ATTAAAAATTACTCTCCAAACCTCTCCRACCAAATAAAAAATTATTCCAC		II			NA	NA	NA	NA	NA	NA	chr1:2929155-2929376	S_Shore	ACCCAGATTCCTGGCCCTCAGAAACATGAGATGAGAAACACTTGTCTTAAGCTGCTGAAG[CG]TGGAATAACTCCCTACCTGGCCGGAGAGGCCTGGAGAGTAACTCCCAATGTGGCTGGAGA	TTGGGAGTTACTCTCCAGGCCTCTCCGGCCAGGTAGGGAGTTATTCCACG										1:2930140-2930352	Unclassified_Cell_type_specific		0.669059	0.633905	0.0351544	72	117	189
cg02282774	-0.493608	-1.46333	-3.62401	0.000508758	0.999978	-0.836785	chr5	50264516	+	64785311		TTTCTTAACTCTCCTTATCCTTAATCTTTTCCCRAAATACCTAAACCCTC		II			NA	NA	NA	NA	NA	NA	chr5:50265085-50265737	N_Shore	ACCCAGCGCTAACACACAAGACAAATTAAAGAAAGGGGCAAATCGGAGGAGGGGCTAAGG[CG]AGGGTCCAGGCATTTCGGGAAAAGATCAAGGACAAGGAGAGTTAAGAAACTGACCGTGGG	TTCTTAACTCTCCTTGTCCTTGATCTTTTCCCGAAATGCCTGGACCCTCG							CDMR		5:50300158-50300386				0.249611	0.317267	0.0676556	177	13	190
cg16109680	0.218575	0.0569325	3.72859	0.000358519	0.999978	-0.603272	chr1	159161344	+	50779454		TAATTCTACCATTTACCTCTAAAAACACACAAACATATCTATTATTCTAC		II			NA	NA	NA	NA	NA	NA	chr1:159158228-159158498	S_Shelf	TAGTCACAACTGCTTCTCCTGTTCTTGTTCTTATATGTAGGTGGTGGCAGGAAGGCCAAA[CG]TAGAACAACAGATATGTCTGTGTGTTTTCAGAGGTAAATGGTAGAACCATATCAGAAAAG	CGTAGAACAACAGATATGTCTGTGTGTTTTCAGAGGTAAATGGTAGAACC			CADM3;CADM3	NM_001127173;NM_021189	Body;Body								0.524145	0.484736	0.039409	116	75	191
cg07164791	0.214446	-0.146808	3.76471	0.000317271	0.999978	-0.521693	chr10	134885969	-	40678443	30742418	AAAACCCAAAACTATAACCAAAAAACCTACAACTACCACAAATACTAACA	AAAACCCGAAACTATAACCGAAAAACCTACAACTACCACGAATACTAACG	I	A	Red	NA	NA	NA	NA	NA	NA	chr10:134884426-134884646	S_Shore	CGTATCCCCCAGGGAGCCCGAGGCTGTGACCGGGAGGCCTGCAGCTGCCACGGATGCTGA[CG]GACCTGCACTCACCACAGGAGGTCCGGCTGGAGGGCGGGTCTGGGCAGGGGCCACCGGGT	GGAGCCCGAGGCTGTGACCGGGAGGCCTGCAGCTGCCACGGATGCTGACG									10:134735896-134736124				0.4882	0.451301	0.0368992	102	101	203
cg12931682	0.371306	-2.70061	4.21653	6.49593e-05	0.993103	0.537111	chr2	149895553	-	55635400	64782439	ATCAAAATCTAATCACTACCTCAAAACAAACAACTACCAACATCTAAACA	ATCGAAATCTAATCGCTACCTCGAAACGAACAACTACCAACATCTAAACG	I	A	Red	NA	NA	NA	NA	NA	NA	chr2:149895022-149895808	Island	CGCAGTGGCGGGGTCGGGGTCTGGTCGCTGCCTCGAGGCGAGCAGCTGCCAACATCTGGA[CG]GGACGGGAGCAGGGGGCCGGGGCAAGGCTGGAGCGGTGTGGGTCTCTAATCGTCCAGAGC	GTCGGGGTCTGGTCGCTGCCTCGAGGCGAGCAGCTGCCAACATCTGGACG			LYPD6B	NM_177964	5'UTR				2:149603238-149604021	2:149895499-149895978	Unclassified_Cell_type_specific	TRUE	0.147406	0.117821	0.0295849	22	186	208
cg24633027	-0.283036	1.02689	-3.62615	0.000505157	0.999978	-0.832048	chr5	140754314	+	46646440		ATTATCATTCACATCTAAAACTATTACCAAAATTTAAACRACRCTTAAAC		II			NA	NA	NA	NA	NA	NA	chr5:140755254-140755941	N_Shore	CGGGAAGGAGAAGCCGTTTACCGCCTGGTCCTTACTGCCATGGATGGCGGCGACCCTGTC[CG]CTCAAGCGTCGCCCAAATTCTGGTAACAGTTCTAGATGTGAATGACAACACTCCAATGTT	TTGTCATTCACATCTAGAACTGTTACCAGAATTTGGGCGACGCTTGAGCG			PCDHGA4;PCDHGA1;PCDHGA6;PCDHGA5;PCDHGB1;PCDHGA3;PCDHGA6;PCDHGA2;PCDHGB2;PCDHGB3	NM_018917;NM_018912;NM_018919;NM_018918;NM_018922;NM_018916;NM_032086;NM_018915;NM_018923;NM_018924	Body;Body;1stExon;Body;Body;Body;1stExon;Body;Body;Body				5:140734377-140734636				0.652352	0.696844	0.044492	175	42	217
cg03904220	0.261986	1.94766	4.23461	6.08386e-05	0.993103	0.580835	chr2	220379635	+	71729506		ACAACCAACRAAATAAATAAAACCAATACCCACAAAATTCTACRCAATCC		II			NA	NA	NA	NA	NA	NA	chr2:220377743-220377946	S_Shore	CACCTTTGCCAGCACCAGCACCCTGCATGGACTGGGCCGGGCCTGTGGCCCAGGCCCCCA[CG]GACTGCGCAGAACCCTGTGGGCACTGGCCCTACTCACCTCGCTGGCTGCCTTCCTGTACC	CGGACTGCGCAGAACCCTGTGGGCACTGGCCCTACTCACCTCGCTGGCTG			ACCN4;ACCN4	NM_018674;NM_182847	1stExon;1stExon				2:220087856-220088084	2:220378513-220380002	Unclassified		0.802735	0.774086	0.0286495	20	198	218
cg26434090	0.184932	0.749705	4.16331	7.87147e-05	0.993103	0.408946	chr11	117665395	-	58728509		CRAACATTCACATTTACATTTTCCTTAATACCRCRAAAATAACTAACAAC		II			NA	NA	NA	NA	NA	NA	chr11:117666634-117668141	N_Shore	TGTAACAGGCTCGAACATTCACATTTACATTTTCCTTGGTGCCGCGGGGGTGACTGGCAA[CG]GGAGAGAAAATACTCCAAACCCCATCTTTCTTGCTGTCTCCGCATCACATCTTCCCCCAA	GAACATTCACATTTACATTTTCCTTGGTGCCGCGGGGGTGACTGGCAACG			DSCAML1	NM_020693	Body				11:117170587-117170866	11:117665394-117665536	Unclassified_Cell_type_specific		0.637139	0.607952	0.0291867	27	191	218
cg13280359	0.255529	1.57002	3.86055	0.000228601	0.999978	-0.302862	chr4	1353105	-	47614423		CTTCCRTCTAAAAACAAACCRAAAATAAATCTCCTAAATCAATATACAAC		II			rs115591760	0.018245	NA	NA	NA	NA		OpenSea	CCTCTGTGTGGCTTCCGTCTGGGAGCAGGCCGAGGGTGAATCTCCTGGATCAATGTGCAG[CG]TCATTTGGTAGATTGCGTGTCCAGCCTTGCCGCGCTGTAGGGTGGGTGTGATCATCCGTG	CGCTGCACATTGATCCAGGAGATTCACCCTCGGCCTGCTCCCAGACGGAA			KIAA1530	NM_020894	Body				4:1342970-1343164				0.758138	0.725047	0.0330909	79	139	218
cg10372188	0.218849	-0.43228	3.77587	0.000305458	0.999978	-0.496363	chr11	117748169	+	58714450		AAAACTAAATACAAAAATATACTCCAAATCRCRTCACAAACAAAATTACC		II			NA	NA	NA	NA	NA	NA	chr11:117747102-117747717	S_Shore	CCAAGAGTCAAAATTCATGATGACGAACTTTGAATGTGAAGATGTAAATAAATCCTGGCT[CG]GCAACCCTGCCTGTGACGCGACTTGGAGCATATCTCTGCACTCAGCTCCTGAGTCTATTT	CGGCAACCCTGCCTGTGACGCGACTTGGAGCATATCTCTGCACTCAGCTC			FXYD6;FXYD6;FXYD6;FXYD6;FXYD6	NM_001164836;NM_022003;NM_001164832;NM_001164837;NM_001164831	TSS1500;TSS1500;TSS1500;TSS1500;TSS200								0.438868	0.404043	0.034825	99	119	218
cg23112821	-0.217344	1.45794	-3.87005	0.000221241	0.999978	-0.281011	chr14	100658902	-	25683459	34669509	CAAAAACCTATTTATAAACCCAAAAACACAAAAATCAAAAATAAAACTCA	CAAAAACCTATTTATAAACCCGAAAACACGAAAATCAAAAATAAAACTCG	I	A	Red	NA	NA	NA	NA	NA	NA	chr14:100659096-100659611	N_Shore	TGCGTCAAGGCCCAGGGACCTGTTTGTGGGCCCGAGAGCACGGGGGTCAGGGGTGGGGCT[CG]AGTCTCGTCCCAGGGCTCCGGGACAAGCTTCCTGGAGGAGGCAGCGTGAGCTCTGGGAGG	CGAGCCCCACCCCTGACCCCCGTGCTCTCGGGCCCACAAACAGGTCCCTG								TRUE	14:99728354-99729349	14:100658849-100659998	Promoter_Associated		0.719958	0.752206	0.0322488	76	147	223
cg22539279	-0.570798	-3.20848	-3.62258	0.000511169	0.999978	-0.839939	chr3	130745654	+	71788328	55612319	AAAACATACTAAAAAATCAAAACAAAACAACACCAAAACAAAAATATTCA	GAAACATACTAAAAAATCGAAACGAAACGACACCAAAACGAAAATATTCG	I	C	Grn	rs75947470	0.013889	NA	NA	NA	NA	chr3:130745388-130745840	Island	TCAGGCTAGGAAAGCTTGGCCCGCCGGTCCTCCTCTGCTTTCTCCGCCTACTTGGGTCGG[CG]AACACTTCCGCCTTGGTGCCGCCTCGCCCCGACTTCCCAGTATGCCCCGCGCCGTCTCCC	GGGGCATACTGGGAAGTCGGGGCGAGGCGGCACCAAGGCGGAAGTGTTCG			NEK11;NEK11;NEK11;ASTE1	NM_024800;NM_001146003;NM_145910;NM_014065	TSS200;TSS200;TSS200;TSS200			TRUE	3:132227938-132228682	3:130745132-130746003	Promoter_Associated		0.0908776	0.13425	0.0433728	178	47	225
cg26562772	0.256878	-1.62859	3.80427	0.000277287	0.999978	-0.43177	chr1	221890431	-	48715343		CACAAATTCCAAAAAACAATCACAAATTAAAATAAATCATAACRAAAAAC		II			NA	NA	NA	NA	NA	NA		OpenSea	ACAACCATAAACACAGATTCCAGAAGGCAGTCACAAATTAAGATAAGTCATAACGGAAGA[CG]CTGTCCAGTTCCTGGGTGCTATGAGAGGGGACTAATTAGATTGGGGTTCATGGACAGCCT	ACAGATTCCAGAAGGCAGTCACAAATTAAGATAAGTCATAACGGAAGACG			DUSP10;DUSP10;DUSP10	NM_144728;NM_007207;NM_144729	5'UTR;Body;5'UTR			TRUE					0.258667	0.225259	0.0334083	90	136	226
cg24258347	0.299997	1.01192	3.59686	0.00055659	0.999978	-0.896711	chr11	13983851	-	16738333		CCCTACTATAACTAATCRCAAATCACAATTTACTCATCTATAAAATAAAC		II			NA	NA	NA	NA	NA	NA	chr11:13984066-13986349	N_Shore	GCCGCATCTAACCCTGCTGTAACTGGTCGCAAGTCACAGTTTGCTCATCTATAAAGTGAG[CG]AAAGTAATGTAATCTTTATTGGGAGTAGGGAACATGAAGGCGAGTCGATACAGTAAGTAA	CGCTCACTTTATAGATGAGCAAACTGTGACTTGCGACCAGTTACAGCAGG			SPON1	NM_006108	TSS200								0.683429	0.635235	0.0481946	194	33	227
cg16750741	-0.355917	1.57867	-3.72378	0.000364392	0.999978	-0.614117	chr13	111973105	-	53617428		TAAAACTAAAAAACACAAATAACTAAAAAAACCCRCCTAAAATATAAAAC		II			rs12855715	0.447318	NA	NA	NA	NA		OpenSea	TCCACGTGGAGTGGGACTGAGAGGCACAGGTGGCTGAGGGGACCCGCCTGGGATGTGAGG[CG]CAGGTGAGTCGATGAACGCCCCCTCCTGGTGTGAGCCGCCCGCTCCCCAAACGACGTCCC	CGCCTCACATCCCAGGCGGGTCCCCTCAGCCACCTGTGCCTCTCAGTCCC			C13orf16;C13orf16	NM_152324;NM_152324	1stExon;5'UTR				13:110771050-110771181				0.731464	0.767119	0.0356553	118	112	230
cg21004604	-0.331047	-0.399026	-3.56807	0.000611979	0.999978	-0.959962	chr17	4378085	+	19706490		AAAAATAATAACTATAAACCCTAACACAAACTCRTTAAAATAAACTTACC		II			rs76915951	0.118399	NA	NA	NA	NA		OpenSea	ATAATTACTGTGTTTATGATGAGACCGCAGGTATGCGTGGGTACATGCCAGGCTGTTTTT[CG]GCAAGTCCACCCCAACGAGCCTGTGCCAGGGTTTATAGTCATCATCTTTCTGGTGCCCTC	CGGCAAGTCCACCCCAACGAGCCTGTGCCAGGGTTTATAGTCATCATCTT			SPNS3	NM_182538	Body				17:4324799-4325035				0.408996	0.473975	0.0649782	212	18	230
cg19790935	0.321662	-2.60374	4.44593	2.79658e-05	0.993103	1.09895	chr3	44519315	+	40735407	25652426	AACACAACAAAAAAAATACAAAAAAACAAACACAACTAAACATCCAAACA	AACACGACAAAAAAAATACAAAAAAACAAACGCGACTAAACATCCGAACG	I	T	Red	NA	NA	NA	NA	NA	NA	chr3:44518838-44519368	Island	GGCGGGCGGCGGGGCTTGTCCAACATCCCTCACCTCCCTCAGTTGGACATTTCCCTTCCA[CG]CTCGGATGCCCAGCCGCGCCTGTTTTCTTGCATCCCTCCTGTCGTGTCTGCGGGGCTGCC	CGCTCGGATGCCCAGCCGCGCCTGTTTTCTTGCATCCCTCCTGTCGTGTC			ZNF445	NM_181489	TSS200					3:44518593-44519929	Promoter_Associated		0.153508	0.126332	0.0271765	6	233	239
cg01628881	0.31912	1.64133	3.67264	0.000432672	0.999978	-0.728724	chr2	388372	+	52725449		AAACRAAATCTAAAAACAAAACATTCAAAACAAAACCTCRAAACRACTAC		II			rs112114717	0.011436	NA	NA	NA	NA		OpenSea	GAGGCGGCTGCAGGTCTGAGCCGGGGCTGTGGCTTGGCCGACAGGCACCCACAAGGCACC[CG]CAGCCGCTCCGAGGCCCTGCTCTGAATGCTCTGCCTTTAGATTCCGTCCTTAGCATCAGG	GACGGAATCTAAAGGCAGAGCATTCAGAGCAGGGCCTCGGAGCGGCTGCG									2:378350-378419				0.767855	0.729448	0.0384064	149	90	239
cg04341806	0.292543	1.03137	3.57736	0.000593567	0.999978	-0.939596	chr13	46757395	-	42679414		CTCCCAAATCAAATACTACRCTAAAAATATCTACTCCAAAATTAACATAC		II			NA	NA	NA	NA	NA	NA		OpenSea	ATGTGGCTGTACTCCCAGGTCAGATGCTGCGCTGAAGATATCTGCTCCAGAGTTGACATG[CG]TCCGTGTCCGCTGGGCCACGGGCCTCTCAGGTGGTCACGGTATTCTGACTGGTTGGAGGG	CGCATGTCAACTCTGGAGCAGATATCTTCAGCGCAGCATCTGACCTGGGA		TRUE	LCP1	NM_002298	TSS1500					13:46757260-46757650	Promoter_Associated		0.686421	0.638539	0.0478821	205	34	239
cg08211199	0.282292	0.474789	3.57452	0.000599133	0.999978	-0.945818	chr19	55458886	-	71666437		CTCCCTCAAATCAAATCTTACTTCCAACCTATATTTCCTACAAAAAAAAC		II			NA	NA	NA	NA	NA	NA		OpenSea	CCAGCACTCACCTCCCTCAGGTCAGGTCTTGCTTCCAGCCTGTGTTTCCTGCAAAGGAAA[CG]GATAAAAAGGGGAGGTCTCTGGCCCTTGGTACGCTAGGTGGAGAGACAGCTTTCCCGCCC	TCCCTCAGGTCAGGTCTTGCTTCCAGCCTGTGTTTCCTGCAAAGGAAACG			NLRP7;NLRP7;NLRP7	NM_139176;NM_001127255;NM_206828	TSS200;TSS200;TSS200								0.597398	0.550407	0.0469907	206	36	242
cg22343728	-0.482982	1.47038	-3.54903	0.000651438	0.999978	-1.00161	chr22	46287028	+	26622337	59671385	ACAATAAAAACCACAAAAATAAAACCAACAAAATTCCTAAAAAACAAACA	GCGATAAAAACCGCGAAAATAAAACCGACGAAATTCCTAAAAAACAAACG	I	C	Grn	rs35871417	0.090008	NA	NA	NA	NA	chr22:46285477-46285986	S_Shore	CTCCCAGGAGCTCTGGCCGCAGCCCCGGGCTCTCCCGTACCCACCGTTCTCCCAGCCCAG[CG]TCTGTCCTTCAGGAACCCCGCCGGCCCCACCTCCGCGGTCTCCATCGCGGGTCCCAGCAC	GCGATGGAGACCGCGGAGGTGGGGCCGGCGGGGTTCCTGAAGGACAGACG									22:44664192-44666286				0.7025	0.76904	0.0665392	230	15	245
cg08675743	0.203439	-0.0391288	3.71899	0.000370325	0.999978	-0.624895	chr5	114938439	-	25777315		RTAAATCTTTCAAAAATACAACRACTCTCCTAATTCCCTAAAATAATCTC		II			NA	NA	NA	NA	NA	NA	chr5:114937613-114938149	S_Shore	CCAGACAAACCGTAGATCTTTCAGAGGTACAGCGACTCTCCTGGTTCCCTAAGATAGTCT[CG]ACTTTTCCTTTCCCTTTGCGGCCCTCTCACTTGACTACTGCAGCCAACCATACCCCTGAT	CGAGACTATCTTAGGGAACCAGGAGAGTCGCTGTACCTCTGAAAGATCTA			TMED7-TICAM2;TICAM2;TMED7-TICAM2	NM_001164468;NM_021649;NM_001164469	Body;TSS1500;Body					5:114937345-114938922	Unclassified	TRUE	0.505535	0.471718	0.0338166	122	128	250
cg03028337	0.188344	-0.165724	3.80212	0.000279331	0.999978	-0.436674	chr2	56410087	-	59617307		ATCCTACCAAATAAAAATTATTCCCTCTACACCCRAATTAACTAAAACCC		II			NA	NA	NA	NA	NA	NA	chr2:56410865-56412539	N_Shore	TTTTGATTATCATCCTACCAGATAGAGATTATTCCCTCTGCACCCGGGTTAACTGAAACC[CG]GTGGGGGTAGATCCTTGCCATTTTCCGGCCCTGTACCCCACTGGAAATAACATGCGGTGG	CGGGTTTCAGTTAACCCGGGTGCAGAGGGAATAATCTCTATCTGGTAGGA			CCDC85A	NM_001080433	TSS1500					2:56410030-56411079	Unclassified		0.482846	0.451569	0.0312768	91	163	254
cg09325404	-0.407922	-2.99927	-3.92875	0.000180521	0.999978	-0.145193	chr2	43903470	-	70671435		AACATACCCTTAAAAAATAATATCCCACTAACRAAAACCATTTTCCAAAC		II			NA	NA	NA	NA	NA	NA		OpenSea	TGCTCCCAAGCAACATACCCTTAAAAAATGATGTCCCACTAGCGGAAACCATTTTCCAGG[CG]TTAGGACAGTGTGCCAGGGTCAAAGGCAGCCTGGGACCGGGTCCTGGGGTCCCGCGCCTT	CGCCTGGAAAATGGTTTCCGCTAGTGGGACATCATTTTTTAAGGGTATGT			PLEKHH2;LOC728819	NM_172069;NM_001101330	Body;TSS200			TRUE	2:43756974-43757194			TRUE	0.104838	0.133661	0.0288233	65	193	258
cg10143488	-0.297344	2.21043	-3.75029	0.000333163	0.999978	-0.554317	chr4	141085292	-	12694362		CCTATTAATTATTTTTAAAAAAAATCTTCAAACCTAACATAACAACTCAC		II			NA	NA	NA	NA	NA	NA		OpenSea	CTGCATCCTTTCCTATTAATTATTTTTAAAGAAAATCTTCAGGCCTAGCATGGCAGCTCA[CG]TCTGTAGTCCCAGCTACGTGGGAGGCTGAGGAGGGAGGATAGCTTGAGCCCAGGAGTTCA	CGTGAGCTGCCATGCTAGGCCTGAAGATTTTCTTTAAAAATAATTAATAG								TRUE					0.807631	0.839685	0.0320533	107	151	258
cg24996120	0.25517	1.74869	3.91673	0.000188227	0.999978	-0.173106	chr15	25237035	+	51673383		AAAACTAACCTTTTTAACAATTCCATCATAAAAAAAAAATCTTACACCAC		II			NA	NA	NA	NA	NA	NA		OpenSea	TATGTATGAAAGTCATGGATGTGGATGTTATTTTGTCAGTGGTCTTTCTGTTAAAATTTA[CG]TGGTGTAAGATTTTCTTTTCATGATGGAATTGCCAAAAAGGCCAGCCTCTAGAACACTTA	CGTGGTGTAAGATTTTCTTTTCATGATGGAATTGCCAAAAAGGCCAGCCT	TRUE												0.779169	0.750357	0.0288126	68	194	262
cg13213799	0.299516	2.18439	3.86659	0.000223892	0.999978	-0.288964	chr14	104834222	+	30612336		ATCATAAAAATTTATCCTCACTTAAACCRAAACTCRTATACTTAAACTCC		II			NA	NA	NA	NA	NA	NA		OpenSea	CGCCAGGAAGCTCTTCCCATAGGAAGCCTCAGGGTGAGTGGGCGCCCTCGGAGATAAACA[CG]GAGCCCAAGCACACGAGCTCCGGCCTAAGTGAGGATAAATCTCCATGACAAATGTCTCCT	CGGAGCCCAAGCACACGAGCTCCGGCCTAAGTGAGGATAAATCTCCATGA									14:103905267-103905416				0.827681	0.79809	0.0295901	77	185	262
cg19156280	-0.31602	-2.07473	-3.93125	0.000178957	0.999978	-0.139381	chr3	25825111	-	29661325	68744346	ACAAAAACAAAATCTTCAACCAACAAAAACAAAATCAAAAACCTAAAACA	ACAAAAACGAAATCTTCGACCGACAAAAACGAAATCGAAAACCTAAAACG	I	A	Red	NA	NA	NA	NA	NA	NA	chr3:25824336-25825456	Island	GGTCCTCGGCCGGCAGGGGCGGGGTCTTCGGCCGGCAGGGGCGGGGTCGGGGGCCTGGGG[CG]GGGTCGGGGACCGGGGCCAGGAGCGGGGGAGCTCGGCTGGGAGCTACGGCTGCCCCTTCG	CGCCCCAGGCCCCCGACCCCGCCCCTGCCGGCCGAAGACCCCGCCCCTGC			NGLY1;NGLY1;NGLY1;NGLY1	NM_018297;NM_001145293;NM_001145294;NM_001145295	TSS200;TSS200;Body;TSS200				3:25799345-25800501	3:25824145-25825829	Promoter_Associated		0.184579	0.213202	0.0286231	64	199	263
cg24804544	-0.345864	-2.77632	-4.15672	8.06006e-05	0.993103	0.393145	chr7	6544107	-	18616435	22644322	AACAATCTTTCAACAACCAATTTAAAAATAAAAACAAAATTCTCAAAACA	AACGATCTTTCAACGACCGATTTAAAAATAAAAACGAAATTCTCGAAACG	I	C	Grn	NA	NA	NA	NA	NA	NA	chr7:6543795-6544108	Island	CCCTGAAATAGAGACGGTCTTTCAGCGACCGATTTAAGGGTGAGGACGGGGTTCTCGAGA[CG]CTAGATTGAGAAGCTGGGTGGGGTCTATGGGGGTCGGGCCAGGGACTAGGGCGGGGCCTG	GACGGTCTTTCAGCGACCGATTTAAGGGTGAGGACGGGGTTCTCGAGACG			GRID2IP	NM_001145118	Body				7:6510243-6511057	7:6543254-6544257	Promoter_Associated		0.120452	0.147481	0.0270283	30	235	265
cg16355945	0.283459	-1.40784	3.64209	0.000479087	0.999978	-0.796705	chr12	132654742	-	62656471		TCAACCCTCTTCCTACACTAACAAAAATACCATTAATCAACCTTTCTAAC		II			NA	NA	NA	NA	NA	NA	chr12:132653023-132653236	S_Shore	ACGTTGTGATGTCAGCCCTCTTCCTGCACTAGCAAAAGTGCCATTAATCAGCCTTTCTGA[CG]GTTACAGGAATTCTTAATGATGCATTTATTTACACAGATTTCTCTGCTCTGGGTAAATTC	CAGCCCTCTTCCTGCACTAGCAAAAGTGCCATTAATCAGCCTTTCTGACG								TRUE				TRUE	0.289638	0.252928	0.0367096	165	103	268
cg03671052	0.527461	-1.83306	3.52931	0.000694836	0.999978	-1.04459	chr5	180086260	+	17736327	17747406	CTTTACAAACCAAAACTCACTATCTCCCCTAACTTAACAAAAAAACAACA	CTTTACAAACCGAAACTCACTATCTCCCCTAACTTAACGAAAAAACGACG	I	A	Red	rs115394840	0.018245	NA	NA	NA	NA		OpenSea	ACCCCGCGTCCCCGCCGCCACCCCCCACCCCCCAGTCCCCACCTCTCCGCCTCCCCCGCC[CG]CCGCCTTCCCGCCAAGCCAGGGGAGACAGTGAGCCCCGGCTTGTAAAGAAAAGTAAAATG	CTTTACAAGCCGGGGCTCACTGTCTCCCCTGGCTTGGCGGGAAGGCGGCG									5:180018036-180018878				0.251016	0.190562	0.0604539	245	23	268
cg25104613	0.188719	0.362909	3.71746	0.000372232	0.999978	-0.628324	chr1	20649108	+	33612395		ATTAATCCTAAAAACCCAAACACTTCTCACACCRAATAATTTTTTACTCC		II			rs10916765	0.232908	NA	NA	NA	NA		OpenSea	AAGCTAAGAGATGACCTGCCCTCAAGTATAATAGCAAACAAGTTGACGGGAGGCAGAGAT[CG]GAGCAAAAAACTATTCGGTGTGAGAAGTGCCTGGGCCTCCAGGACCAACAACAGCAGCAC	CGGAGCAAAAAACTATTCGGTGTGAGAAGTGCCTGGGCCTCCAGGACCAA			VWA5B1	NM_001039500	Body					1:20648404-20649239	Promoter_Associated		0.573682	0.542035	0.0316469	124	155	279
cg00374263	-0.231869	-0.743191	-3.62903	0.000500346	0.999978	-0.825666	chr14	75229370	-	30801428		TATATCTAATTTTTACTCTCTTTACTTTTACTCTAAAATTCTACAACACC		II			NA	NA	NA	NA	NA	NA	chr14:75229927-75230531	N_Shore	TAGACCATCTTTGTATCTGGTTTTTGCTCTCTTTGCTTTTGCTCTGAGATTCTGCAACAC[CG]ATTTATATGTGTTGAGACAGTCTAAAAAATTCCATTTCTCCCCTTCTACAATTCCTGCAG	CGGTGTTGCAGAATCTCAGAGCAAAAGCAAAGAGAGCAAAAACCAGATAC			YLPM1	NM_019589	TSS1500								0.361813	0.398378	0.036565	173	107	280
cg20434856	0.163279	0.880393	3.88008	0.000213706	0.999978	-0.257876	chr5	16713588	-	22607510		AAAAACATAAAACAATAATAAACACCATTCCTATACTTTAAAAAATACCC		II			NA	NA	NA	NA	NA	NA		OpenSea	TCCCCACAGCTAAAGACATGGAACAATAATGAACACCATTCCTGTGCTTTAAAAAGTGCC[CG]GTCGCCATGACAACCCCTTCCATTCTCGGGCTAATTAGTGTGGTGTGGTTGTAGGATTTG	CGGGCACTTTTTAAAGCACAGGAATGGTGTTCATTATTGTTCCATGTCTT			MYO10	NM_012334	Body			TRUE				TRUE	0.657722	0.629389	0.0283333	73	208	281
cg01021742	0.250205	1.46934	3.65918	0.000452569	0.999978	-0.75872	chr17	77100132	+	69726452	24709446	ATCATTTTTAACAAACAAAACTCCAAAATAAATACCACACAAAACTACCA	ATCATTTTTAACGAACGAAACTCCAAAATAAATACCGCACGAAACTACCG	I	C	Grn	NA	NA	NA	NA	NA	NA	chr17:77099995-77100203	Island	AGGAAGGAAACGCACATTTCACACGTTAGCCTGGCGGGACCTACAGCCGGCGCTGTAAGG[CG]GCAGCTCCGTGCGGCACCCACCTTGGAGCCCCGCTCGTTAAAAATGATCTCCACGTCTAA	CGGCAGCTCCGTGCGGCACCCACCTTGGAGCCCCGCTCGTTAAAAATGAT			HRNBP3	NM_001082575	Body			TRUE	17:74611614-74611765				0.744856	0.711252	0.0336041	154	134	288
cg09681675	-0.255499	1.47529	-3.69522	0.000401138	0.999978	-0.678231	chr16	3481785	+	73638419	27606454	CACTAAATAATCTCCATATAAATCTAACAATACAAATAAAAATATTTACA	CGCTAAATAATCTCCGTATAAATCTAACAATACGAATAAAAATATTTACG	I	A	Red	NA	NA	NA	NA	NA	NA		OpenSea	GACAGTCACACCCATGATACCCTCCTGCTGATGCGGAGGAAGAGACCTGAGGAGTTCCTC[CG]CAAACACTCTTACCCGTACTGCTAGATTTACACGGAGATCACCTAGCGATATGCAGTGGA	CGCTAGGTGATCTCCGTGTAAATCTAGCAGTACGGGTAAGAGTGTTTGCG									16:3421786-3422166				0.721843	0.753574	0.0317304	138	153	291
cg15966747	-0.395962	-0.420409	-3.50364	0.000755428	0.999978	-1.1003	chr10	102322694	-	56720435		RCACCCTAAAAACTCCAAATAAACRTTAAAAACCTAAAACRAAATAAACC		II			NA	NA	NA	NA	NA	NA	chr10:102322555-102322759	Island	GGGATCCGGGCGCACCCTGGAAGCTCCAGATGGGCGTTGGAGACCTAGGGCGAGATGAAC[CG]AGGACCGTCCATGTGTGTGGGTGCCGCTCAGGAGCGGGGAGGTGGGGGTGTGGGTGGACG	CGGTTCATCTCGCCCTAGGTCTCCAACGCCCATCTGGAGCTTCCAGGGTG									10:102311823-102312692	10:102321573-102323327	Unclassified_Cell_type_specific	TRUE	0.407303	0.469253	0.0619508	271	20	291
cg05221057	0.328538	-1.97755	3.66453	0.000444555	0.999978	-0.746801	chr13	112711587	-	58667455	29623407	AACACATTTATCATTTTCTTATCTATACATTCACTCCTCCCCCATCCTCA	AACACATTTATCATTTTCTTATCTATACGTTCACTCCTCCCCCATCCTCG	I	A	Red	NA	NA	NA	NA	NA	NA	chr13:112709884-112712665	Island	GACTCGCCGCGGGGCACATTTGTCATTTTCTTATCTGTGCGTTCACTCCTCCCCCATCCT[CG]GCTTTTGGGATTGGCCGCCGCCCAACGGACCCAGACTGTTTCTCTCTGGGTCGCCATTTT	GGCACATTTGTCATTTTCTTATCTGTGCGTTCACTCCTCCCCCATCCTCG									13:111759047-111759803	13:112711213-112711706	Unclassified_Cell_type_specific		0.218139	0.185304	0.0328347	151	141	292
cg17485021	0.363723	-2.73517	3.99919	0.0001411	0.999978	0.0193213	chr4	13530094	+	23687397	33622476	CTAAACTCCAAACAAAACTCTTAAAATACAAAAATAAAAACATAACCCCA	CTAAACTCCGAACGAAACTCTTAAAATACAAAAATAAAAACGTAACCCCG	I	T	Red	NA	NA	NA	NA	NA	NA	chr4:13530847-13531244	N_Shore	AAGAAAAAAATGCATTGATCTATATTAGAACTTCAAGTTAAACAGTGAGGCCCTGGTAGA[CG]GGGTTACGTCTCTACTTCTGTATCTCAAGAGCTTCGCCCGGAGTCTAGCTTCAAGTGGGT	CGGGGTTACGTCTCTACTTCTGTATCTCAAGAGCTTCGCCCGGAGTCTAG							CDMR	TRUE	4:13139192-13139586	4:13529993-13530432	Unclassified		0.143585	0.117197	0.0263885	50	248	298
cg09582200	0.195949	0.407876	3.65725	0.00045549	0.999978	-0.763013	chr11	117748236	+	50748345		CTATAAACTAAACCTCCCATAAAATCAATCTCTAATCACCATTTTCCCAC		II			NA	NA	NA	NA	NA	NA	chr11:117747102-117747717	S_Shore	CCTGCCTGTGACGCGACTTGGAGCATATCTCTGCACTCAGCTCCTGAGTCTATTTCCTCA[CG]TGGGAAAATGGTGATTAGAGACTGACCCCATGGGAGGCTTAGCTCATAGTGAGTGCTCAA	CGTGGGAAAATGGTGATTAGAGACTGACCCCATGGGAGGCTTAGCTCATA			FXYD6;FXYD6;FXYD6;FXYD6;FXYD6	NM_001164836;NM_022003;NM_001164832;NM_001164837;NM_001164831	TSS1500;TSS1500;TSS1500;TSS1500;TSS200								0.581453	0.5493	0.032153	157	148	305
cg15409712	-0.26955	-0.24158	-3.53952	0.000672032	0.999978	-1.02236	chr4	103426288	+	64697483		CTTATTTTCTAAACTATTAACTAATCTTCAAAACCAAATCAACAACCTCC		II			NA	NA	NA	NA	NA	NA	chr4:103422091-103423229	S_Shelf	GTCTCTGCTGTATTAGGGGTTGTTCCTGGGTGCAAATTAATATACTGTCTTTTACATTTC[CG]GAGGTTGTTGACCTGGCCTTGAAGATCAGCCAACAGTTTAGAAAATAAGTTGTGCAAATT	CGGAGGTTGTTGACCTGGCCTTGAAGATCAGCCAACAGTTTAGAAAATAA			NFKB1;NFKB1	NM_003998;NM_001165412	5'UTR;5'UTR					4:103426208-103426421	Unclassified_Cell_type_specific		0.444184	0.484518	0.040334	239	66	305
cg21539223	0.397852	-2.84977	3.6755	0.000428556	0.999978	-0.722347	chr5	112312093	-	54651314	20610386	ATAACAAAAATCACAAACATACTCTTATATTATACAAATTCTCAAAATCA	ATAACAAAAATCGCGAACATACTCTTATATTATACGAATTCTCAAAATCG	I	A	Red	NA	NA	NA	NA	NA	NA	chr5:112312387-112313006	N_Shore	GCAAGATACTTGGTGACAGGAATCGCGAGCATACTCTTGTGTTGTACGGATTCTCAGGGT[CG]GCCCTGCAGAGGAAAGAGCTCAGTCACCGCGAGGTCCTGCACAACATGCCAAAGTCCCGG	GTGACAGGAATCGCGAGCATACTCTTGTGTTGTACGGATTCTCAGGGTCG			DCP2	NM_152624	TSS1500					5:112311702-112312943	Promoter_Associated		0.138011	0.106715	0.0312953	147	162	309
cg27299949	-0.367655	2.69868	-3.74234	0.000342247	0.999978	-0.572272	chr4	46911333	+	26795311		ATTCCTCCCRTAAAAATAACAATCATCTATCTAATTAATCAATTTAAAAC		II			rs9992220	0.250423	NA	NA	NA	NA		OpenSea	CTTCCTGTGAGCAGTTTCCGCCTTAGGTGAAAGGAAGAGGCGGTCACATGAAGGACTGCG[CG]TTCCAAACTGACCAATCAGATAGATGATTGCTATCTCCACGGGAGGAACTAAAAAGACAG	TTCCTCCCGTGGAGATAGCAATCATCTATCTGATTGGTCAGTTTGGAACG			COX7B2	NM_130902	TSS200								0.852223	0.880725	0.0285018	111	200	311
cg06766541	0.156938	-0.267195	3.84451	0.000241573	0.999978	-0.339715	chr7	128556540	-	22691425		CTACTAACCTAAAAAAAACATTAAACCAAACCCAAAACCTATAAAAAAAC		II			NA	NA	NA	NA	NA	NA	chr7:128555329-128556650	Island	CTTACCGGTGACTACTGACCTGGAGGGAGCATTGGGCCAGGCCCAGGGCCTGTAAGGAGA[CG]CCAGACAGATAGCGCGGTGGCCTAGACGACCACTGGGCTTCTTCGGCAGTCTGGAACAGG	TACTGACCTGGAGGGAGCATTGGGCCAGGCCCAGGGCCTGTAAGGAGACG									7:128342626-128343886				0.463926	0.436582	0.0273437	82	231	313
cg07462745	0.292526	1.98896	3.58358	0.000581516	0.999978	-0.92592	chr6	5993745	+	10600416		TATTACACACATATACACACATACATATATAAAAATTAACTTTAAATTTC		II			NA	NA	NA	NA	NA	NA	chr6:5994909-5995203	N_Shore	CTCTTGAGGAATTTGGTTGCAGAGAAATACATATTACAATTTTGCAGAAATGAAACAAAG[CG]AAACCCAAAGCCAACCTCCATATATGTATGTGTGTATATGTGTGTAACAGCACGGGGAAA	GTTACACACATATACACACATACATATATGGAGGTTGGCTTTGGGTTTCG							RDMR	TRUE					0.8083	0.773424	0.0348761	201	118	319
cg27364741	0.247151	0.968325	3.57029	0.000607519	0.999978	-0.955085	chr2	63281069	-	51808376	74765314	TAACCTCTCAAACTCAACCACCCAAAAAAATTTCTTTTATTCCCAATTCA	TAACCTCTCAAACTCGACCGCCCGAAAAAATTTCTTTTATTCCCAATTCG	I	A	Red	NA	NA	NA	NA	NA	NA	chr2:63281034-63281347	Island	TTCTCCCACCTGTGGCCTCTCAGGCTCGGCCGCCCGAGGGAGTTTCTTTTATTCCCAGTT[CG]GCTTTCTTTTGCGAAGGCCGAGATCTGGGCCTGCCAGGGGCCTGCCCGAGTCCTCTATCG	TGGCCTCTCAGGCTCGGCCGCCCGAGGGAGTTTCTTTTATTCCCAGTTCG			OTX1	NM_014562	Body		RDMR		2:63134302-63135304	2:63280765-63281929	Unclassified		0.673229	0.637265	0.0359647	211	110	321
cg19180555	-0.273352	2.3507	-4.34271	4.09821e-05	0.993103	0.844312	chr12	5982295	+	62644340		AACAAAATTATAATTCTAATAAAACTTATAAACTACTCAACCCTCACTCC		II			NA	NA	NA	NA	NA	NA		OpenSea	TTTGCAAGGCTACTGTAAATCACTAATTTCCATATTGTTGTAAATAAAACCAGATAAAGA[CG]GAGTGAGGGCTGAGCAGTTTATAAGCCCTACCAGAATTATAACTTTGTTACTTTTGCCTA	CGGAGTGAGGGCTGAGCAGTTTATAAGCCCTACCAGAATTATAACTTTGT			ANO2	NM_020373	Body			TRUE		12:5981713-5982590	Unclassified_Cell_type_specific		0.825614	0.84941	0.0237961	14	309	323
cg01126080	0.252514	1.73749	3.65543	0.000458263	0.999978	-0.767061	chr4	186847298	-	71708468		AAACAAAAACTACRCTATAACCRCRCTATATACCAAACTTAAAATCTCAC		II			NA	NA	NA	NA	NA	NA		OpenSea	ACAGAGCTGGAGAGCAAGGACTGCGCTATAACCGCGCTATGTGCCAGGCTTGGGATCTCA[CG]TGAAACAAATGGAGGACCTGATGGCTTTTAAGCACAGGAGTGGGCGTGGTCTAATTTGCA	CGTGAGATCCCAAGCCTGGCACATAGCGCGGTTATAGCGCAGTCCTTGCT			SORBS2	NM_021069	5'UTR				4:187084136-187084464				0.778309	0.747629	0.03068	158	170	328
cg02571678	0.286372	1.45751	3.51766	0.000721739	0.999978	-1.06991	chr15	28150943	+	43623403		AAAAAAAATTTTCCTCAACTAATACATATAACATTTCCRCTCCTAATAAC		II			NA	NA	NA	NA	NA	NA	chr15:28147925-28148465	S_Shelf	GCCCAACGGCATTAAATGAACAAGAGAAAAATGAAGTCACACCTACAGAGCTAGTGCAAA[CG]CTATCAGGAGCGGAAATGTCACATGTATCAGCTGAGGAAAATCCCCTCTGAAAATAACCA	CGCTATCAGGAGCGGAAATGTCACATGTATCAGCTGAGGAAAATCCCCTC			OCA2	NM_000275	Body								0.744732	0.704808	0.0399246	258	70	328
cg02538976	0.335816	2.84128	3.99336	0.000144021	0.999978	0.00564361	chr7	157443760	+	58765356		RCACCTTCCRCAAATTTACCTATAAAATTTCTAAACTCCCAACRTAAAAC		II			NA	NA	NA	NA	NA	NA	chr7:157440024-157442721	S_Shore	TCTGAGGAGGTCACAGCTTGTGCCGGCATCTGTTGGTCGCCAGCACAGACACGCATCACG[CG]TCTCACGCTGGGAGTTCAGAAACCCCACAGGCAAATCTGCGGAAGGTGCGGCGCGACTCC	CACCTTCCGCAGATTTGCCTGTGGGGTTTCTGAACTCCCAGCGTGAGACG			PTPRN2;PTPRN2;PTPRN2	NM_002847;NM_130842;NM_130843	Body;Body;Body				7:157132378-157136577				0.883757	0.858798	0.0249592	52	283	335
cg07695447	-0.279509	1.16255	-3.46861	0.000846216	0.999978	-1.17589	chr12	132666163	+	38684508		CRACTAATACCAACATATAAAAACATATACTATCTACTAAATATATACRC		II			rs61943879	0.151142	NA	NA	NA	NA	chr12:132663322-132663748	S_Shelf	ACACACACCCAGCACATGTACCCACCCAGCACACGTTCACTCGCACCCTGCACAGCCCAG[CG]CGCACACACCCAGCAGACAGCACATGCTCTCACATGCTGGCATCAGCCGTCAGCCTCAGC	CGCGCACACACCCAGCAGACAGCACATGCTCTCACATGCTGGCATCAGCC									12:131232089-131233026				0.671635	0.718081	0.0464462	299	37	336
cg12011136	-0.665383	-1.63126	-3.44556	0.0009115	0.999978	-1.22538	chr7	4901750	-	43621420	15774333	AAAAACTCACAAAAACCACAACATTCTAAACTAAAACTCCTACCACTACA	GAAAACTCACGAAAACCACAACGTTCTAAACTAAAACTCCTACCGCTACG	I	C	Grn	NA	NA	NA	NA	NA	NA	chr7:4901336-4901753	Island	CGCCGCCAGCGCGAGGGCTCACGGGAGCCACAGCGTTCTGGGCTGGGGCTCCTACCGCTG[CG]CGGGGGGCTATACATGGGGGTGGGCAGGATTCACGTTGTTGATGACCGGCCAAACTCAAC	GAGGGCTCACGGGAGCCACAGCGTTCTGGGCTGGGGCTCCTACCGCTGCG			PAPOLB;RADIL	NM_020144;NM_018059	TSS200;Body				7:4867808-4868312				0.236094	0.30369	0.0675956	329	14	343
cg05055760	-0.273402	-1.69652	-3.58213	0.000584302	0.999978	-0.929108	chr18	20711985	+	19751341		ATTTCTAATCTTTATAACCACCCTATAATATTAATAAAAACATTATCATC		II			NA	NA	NA	NA	NA	NA	chr18:20714968-20717071	N_Shelf	TAAGAGGTAGATGAGTCGGGGCAAATTATTTAATTCTTCTGAGCCTCGTCTGTAAAATAT[CG]ATGATAATGCTCTCACCAACACCACAGGGTGGTTATAAAGATTAGAAATACTCTGTGGCT	CGATGATAATGCTCTCACCAACACCACAGGGTGGTTATAAAGATTAGAAA										18:20711358-20712327	Unclassified	TRUE	0.226537	0.25913	0.0325932	202	142	344
cg12092090	0.392865	-2.62768	3.59674	0.000556826	0.999978	-0.896993	chr19	13617584	-	28796352	52719319	TTCCTCCAAAATCCAAATCAAACTAACATCTTACAAAAAAAATACACTCA	TTCCTCCGAAATCCGAATCAAACTAACATCTTACAAAAAAAATACGCTCG	I	A	Red	NA	NA	NA	NA	NA	NA	chr19:13616752-13617267	S_Shore	GGAAGCTTCAAATTCCTCCGAGGTCCGGGTCAGGCTGGCATCTTGCAAAAGGAGTGCGCT[CG]GCCCATTAAAAAAAAATAAAAAATAAAAAATAAAAAAATATATATATATTTAAAAATAAA	TTCCTCCGAGGTCCGGGTCAGGCTGGCATCTTGCAAAAGGAGTGCGCTCG			CACNA1A;CACNA1A	NM_001127221;NM_001127222	TSS1500;TSS1500		DMR					TRUE	0.155877	0.123807	0.0320705	195	150	345
cg01322142	0.25981	-0.572528	3.46653	0.000851913	0.999978	-1.18036	chr4	786718	-	23667303		CRCTATAATTACRCRTCTATATACACCTATATATAACTACRTACTTATAC		II			NA	NA	NA	NA	NA	NA	chr4:786118-786341	S_Shore	AGGGAGAGTGGCGCTGTGGTTGCGCGTCTGTATGCACCTGTGTGTGACTGCGTGCTTATG[CG]TACGTGTGGCTGTTGTGGTTGTGTTTGTGTGTGCACCACGTGGTCGTACATCTGTATGTG	CGCATAAGCACGCAGTCACACACAGGTGCATACAGACGCGCAACCACAGC			CPLX1	NM_006651	Body				4:776669-776719	4:786553-786848	Unclassified		0.418781	0.37616	0.0426213	302	53	355
cg15770515	0.268761	2.49387	4.14688	8.34987e-05	0.993103	0.369569	chr3	118864974	+	43633419		CCCTAACTAATCTAAATTACCAAACACTATAAATAAAATTAAACTAAATC		II			rs72953098	0.096364	NA	NA	NA	NA		OpenSea	ACGCAGTGACCCGAACAAAGCCCGTGGGAATCATGGGGCGTTCCTGGAGGGTCGCCTAGA[CG]ACCCAGCCCAACCCCACCCACAGTGCCTGGCAACCTAGACCAGTCAGGGACGCGGCAGGA	CGACCCAGCCCAACCCCACCCACAGTGCCTGGCAACCTAGACCAGTCAGG			C3orf30;IGSF11	NM_152539;NM_152538	TSS200;TSS200			TRUE	3:120347515-120347665				0.85584	0.832691	0.0231489	33	327	360
cg12037324	-0.314322	2.34805	-3.72889	0.000358163	0.999978	-0.60261	chr2	139436940	-	26643325		TAACAAATCTAAATAACAAATTTATTAACACATATTAACTCTTCACCTAC		II			rs72986854	0.010522	NA	NA	NA	NA		OpenSea	AGGCCAGTGTTTAGCAAGTCTAAATGACAAGTTTATTAGCACATATTGACTCTTCACCTA[CG]TGGCAGCGGGGGAGTAGGAGAGGCCTGAATTTTTTTTTTTTTTTTTTGAGACGGAGTCTC	AGCAAGTCTAAATGACAAGTTTATTAGCACATATTGACTCTTCACCTACG			NXPH2	NM_007226	Body			TRUE					0.823011	0.849428	0.0264168	115	247	362
cg00130693	-0.208359	0.21499	-3.52118	0.000713501	0.999978	-1.06226	chr1	226110727	+	53741450		AAACTATTTCCTCATTTACAACAATAACCACTTTACTATTATTCTAAATC		II			NA	NA	NA	NA	NA	NA	chr1:226111642-226112552	N_Shore	AATATGTTTTTGGAGAACAGAACAACTAACTCACCAGATTCTTCCCAATATGCTCATTCA[CG]ACTCAGAATAACAGCAAAGTGGCCACTGTTGTAAATGAGGAAATAGCCTCAAAGTGGCTG	CGACTCAGAATAACAGCAAAGTGGCCACTGTTGTAAATGAGGAAATAGCC			PYCR2	NM_013328	Body								0.523665	0.560161	0.0364967	256	108	364
cg19550474	0.365511	2.33692	3.46814	0.000847511	0.999978	-1.17691	chr4	2059335	+	28787385		AAATATAAATTTTTCTACTAAAAAAACTCATTCCCRAACCATCTCACCCC		II			NA	NA	NA	NA	NA	NA	chr4:2059928-2063181	N_Shore	GGCCTTGAGGCCTCACGAAGTTCTTAAGCGCCCACCGCACCTGTCCTCTTTCCCCCCATG[CG]GGGTGAGATGGCCCGGGAATGAGCCTTCCCAGCAGAAAAACTTACATCTAGAATGTCGAT	CGGGGTGAGATGGCCCGGGAATGAGCCTTCCCAGCAGAAAAACTTACATC									4:2029042-2029149				0.844145	0.804494	0.0396512	300	72	372
cg08307030	-0.492089	-1.63619	-3.40715	0.00103091	0.999978	-1.30731	chr15	76634380	+	34769509		ACTAACCCTAATAAATCCCAAATTCTAATTTTAAAAAACTAAAAATCCTC		II			NA	NA	NA	NA	NA	NA	chr15:76632262-76635515	Island	TCTGGACAGCCCAAGGCGCCAGGATGCAACCTGCTTTCACCAGACTGCAGACCCCTGCTC[CG]AGGACTCTTAGTTTTTCAAAACCAGAATCTGGGACTTACCAGGGTTAGCTCTGCCCTCTC	CTAACCCTGGTAAGTCCCAGATTCTGGTTTTGAAAAACTAAGAGTCCTCG			ISL2	NM_145805	3'UTR				15:74421363-74421637				0.228302	0.296095	0.0677931	361	12	373
cg03573068	0.228547	-2.20441	4.10896	9.56368e-05	0.993103	0.278974	chr11	20620287	+	14605466		ACAATCCTTTCAATAAAATCCTACAAAAACCAAACCTAATTTAACAACRC		II			NA	NA	NA	NA	NA	NA	chr11:20618197-20619920	S_Shore	GCTCTCATTCCCCCTCCCCCGCATTGCTGGGCATCCCGATTTGGACGGTCTCTAAGGTCC[CG]CGCTGCCAAATCAGGCCTGGCTCTTGTAGGATTTTATTGAAAGGACTGTAAAGAAAGAAT	CGCGCTGCCAAATCAGGCCTGGCTCTTGTAGGATTTTATTGAAAGGACTG			SLC6A5	NM_004211	TSS1500				11:20576757-20576866				0.187966	0.165222	0.0227443	39	341	380
cg05490712	-0.315086	-2.8593	-3.71778	0.000371831	0.999978	-0.627604	chr11	31838674	+	18662420	21756382	AATTAACAATTCTCACTAAACTAAAACACAAACTCCAATTACTACAAACA	AATTAACGATTCTCACTAAACTAAAACGCGAACTCCGATTACTACGAACG	I	C	Grn	NA	NA	NA	NA	NA	NA	chr11:31831620-31839038	Island	GGGCTTGGCGGCCCGGCTCCCATGGCGCCCGCGCGCTTCCCGCCGAGGCAGCCAGCGCAG[CG]CCCGCAGTAACCGGAGCCCGCGTTCTAGCTCAGTGAGAATCGCTAATTATTAGGTCTTCC	CGCCCGCAGTAACCGGAGCCCGCGTTCTAGCTCAGTGAGAATCGCTAATT			PAX6	NM_001127612	5'UTR		DMR	TRUE	11:31794464-31796643	11:31838346-31838803	Unclassified_Cell_type_specific		0.114719	0.140472	0.0257535	123	260	383
cg26763380	0.221557	1.60257	3.6015	0.000548125	0.999978	-0.88649	chr8	109233795	-	23788401		TAATTCCTACAATAAAAATCTCCACTCCACTATACTTTATAATCATAATC		II			NA	NA	NA	NA	NA	NA		OpenSea	ACTTTGCTTTGTAATTCCTACAATAAAAATCTCCACTCCACTGTGCTTTATAATCATAGT[CG]AAGTTCACTTCTCTGTTTTGACACGGTAAATAAGCACTGGTAATAAAATAACATATAAAT	CGACTATGATTATAAAGCACAGTGGAGTGGAGATTTTTATTGTAGGAATT			EIF3E	NM_001568	Body			TRUE					0.761054	0.732355	0.0286993	189	197	386
cg01143309	-0.219256	-0.294034	-3.48428	0.000804396	0.999978	-1.14214	chr17	72889783	-	27602352	12627381	AAACTAAAACATATATCTACAATACAAACAAAACAAAACAAACCAAAACA	AAACTAAAACGTATATCTACGATACAAACGAAACGAAACGAACCGAAACG	I	A	Red	NA	NA	NA	NA	NA	NA	chr17:72889349-72890060	Island	CGGAGGACTGGAGGACTGGGGCGTGTGTCTGCGGTGCAGGCGAGGCGGGGCGGGCCGGGG[CG]GAGTCACGCGCCGCCTGGGGACACCCGCCCCCGGGGTCAAGGTGCGAGACACCCTGGCTC	CGCCCCGGCCCGCCCCGCCTCGCCTGCACCGCAGACACACGCCCCAGTCC			FADS6	NM_178128	TSS200			TRUE	17:70400963-70401805	17:72889220-72889968	Unclassified_Cell_type_specific	TRUE	0.436279	0.47317	0.0368913	286	102	388
cg04561804	-0.280779	-1.01764	-3.44479	0.000913735	0.999978	-1.22701	chr3	169683976	+	39748358		ACTATACRAAATAATACAACTCRTTTAAAACAAACTAAAATCTCCATTCC		II			NA	NA	NA	NA	NA	NA	chr3:169684394-169685006	N_Shore	TTCCCCGGGTTCTCTTACTTCTGGATTCTAACAGTGAGTTGTGAGAAGCAACGCGGAAAA[CG]GAATGGAGACTCCAGCTTGTTTTAAACGAGCTGTATTACCCCGCACAGTGCAGGAGAAAA	CGGAATGGAGACTCCAGCTTGTTTTAAACGAGCTGTATTACCCCGCACAG		TRUE	LOC100128164;SEC62;LOC100128164	NR_024409;NM_003262;NR_027622	Body;TSS1500;Body				3:171166661-171166751	3:169683763-169685652	NonGene_Associated		0.317839	0.35947	0.0416314	330	58	388
cg10259735	0.310456	-2.55578	3.76342	0.000318654	0.999978	-0.524597	chr3	49314633	+	13631370	31617341	TAAAACCTACACAAAACACACACATACAATAACCATTAAATAAATCAACA	TAAAACCTACGCGAAACACGCGCATACGATAACCGTTAAATAAATCGACG	I	T	Red	NA	NA	NA	NA	NA	NA	chr3:49314437-49314815	Island	CGGCACCCCCCCTTTGGCGAGTCGGCAGCCACGTCCTTGTCCTCACCCGCAGCGCAGTGA[CG]CCGACCCATCCAACGGTCATCGCATGCGCGTGCCCCGCGCAGGCCCCAAACCCCCACGGA	CGCCGACCCATCCAACGGTCATCGCATGCGCGTGCCCCGCGCAGGCCCCA			USP4;USP4;C3orf62	NM_003363;NM_199443;NM_198562	3'UTR;3'UTR;TSS200			TRUE	3:49289442-49289853	3:49313919-49315227	Promoter_Associated	TRUE	0.157295	0.13249	0.0248048	104	287	391
cg18349306	-0.283448	0.0159927	-3.41534	0.00100428	0.999978	-1.28989	chr4	146267385	-	23624375	24710332	AAAATAACCTAACAAAAACACCAAAACTAACAAAACTAACAAAACTAACA	AAAATAACCTAACGAAAACGCCGAAACTAACGAAACTAACGAAACTAACG	I	A	Red	rs56006530	0.017841	NA	NA	NA	NA		OpenSea	GGGCACAAGGCCAGAGTGACCTGGCGAAGGCGCCGGGGCTGGCGGGGCTGGCGGGGCTGG[CG]GGGCGGCGGGGGAGCCCGGAGTCCCTGGGGGCAGGCGGTCGTCAGGGAGGGGTCTGTTGA	AGAGTGACCTGGCGAAGGCGCCGGGGCTGGCGGGGCTGGCGGGGCTGGCG									4:146486768-146486927				0.485832	0.531956	0.0461244	353	38	391
cg14006318	0.168284	-0.275749	3.63796	0.000485728	0.999978	-0.805888	chr9	139971464	-	36653397		TCAAATTCAAAACCCRTACTAAAACAAAACCTAACTTTCCCCTACRAAAC		II			NA	NA	NA	NA	NA	NA	chr9:139971499-139973965	N_Shore	CCATGCCACTCTCAGGTTCAAAGCCCGTGCTGGGACAGAACCTAGCTTTCCCCTGCGGGG[CG]TCCCTGGGGCCTCTTCCTCCCTTAGCTCAATGGTCGATTCCTCTGCCCACGCCAGCTGGC	CGCCCCGCAGGGGAAAGCTAGGTTCTGTCCCAGCACGGGCTTTGAACCTG			UAP1L1	NM_207309	TSS1500				9:139091029-139093753				0.462676	0.434922	0.027754	166	226	392
cg13784474	0.178076	0.2952	3.63186	0.000495676	0.999978	-0.819412	chr4	3251105	+	34728482		TTAATCTACTTAAACTCRTCRAAAAACTCCTCCCAAACCAACATAAAACC		II			NA	NA	NA	NA	NA	NA	chr4:3250627-3251447	Island	CGTGTCTCCCCAGGCGGAGAAGCACCGGCGGGCCCGCAACTGGACGGACGCCGAGATGCG[CG]GCCTCATGCTGGTCTGGGAGGAGTTCTTCGACGAGCTCAAGCAGACCAAGCGCAACGCCA	CGGCCTCATGCTGGTCTGGGAGGAGTTCTTCGACGAGCTCAAGCAGACCA			C4orf44;C4orf44	NM_001012982;NM_001042690	1stExon;1stExon				4:3220705-3221185				0.56085	0.532938	0.0279113	170	222	392
cg00521464	0.163519	0.218819	3.60135	0.000548397	0.999978	-0.886821	chr17	72872308	+	28735416		TAAACAAAAAAATCTAACTACAAACACAAACATTCCCTAAACCTTATTCC		II			NA	NA	NA	NA	NA	NA	chr17:72868922-72869703	S_Shelf	TAAAAGAACCAGTGGCCTCTGTGCAGCTGCCTAAGGCCACACCACAGAGGGGCTCTCCAA[CG]GAACAAGGCTCAGGGAATGCCTGTGCCTGTAGCCAGACCCCTCTGCCCATCCCCCAGGCT	CGGAACAAGGCTCAGGGAATGCCTGTGCCTGTAGCCAGACCCCTCTGCCC													0.548029	0.51958	0.0284483	190	202	392
cg13471990	0.225433	-0.645432	3.50657	0.000748269	0.999978	-1.09396	chr10	97515222	+	65798420		TAACTTCCTACCTTTAAAATCTAATAAACATAAATTACCACATCCAAACC		II			NA	NA	NA	NA	NA	NA		OpenSea	TTTGTTACACAGTTTAAAAATAATTTGGTCAGGCTCTCATCTACATTGGGGTAATCTTGA[CG]GTCTGGATGTGGTAATTCATGCTCATTAGACTTCAAAGGTAGGAAGTCAAAGTTGGGAAA	CGGTCTGGATGTGGTAATTCATGCTCATTAGACTTCAAAGGTAGGAAGTC		TRUE	ENTPD1;ENTPD1;ENTPD1;ENTPD1;ENTPD1;ENTPD1;ENTPD1	NM_001164182;NM_001164178;NM_001776;NM_001164183;NM_001164179;NM_001164181;NM_001098175	TSS1500;TSS200;TSS1500;TSS1500;TSS1500;TSS200;Body								0.40333	0.369345	0.0339844	269	124	393
cg25679766	0.183851	-0.0916622	3.54077	0.000669289	0.999978	-1.01963	chr6	28558113	+	12624507		AACRACTACATTTTCTATTCTTAACCTTCAACTCCAAAAAACTATTTCCC		II			NA	NA	NA	NA	NA	NA	chr6:28554863-28555124	S_Shelf	GGAGGGGGCTCCCTGACCGAGTCCTCCCCAGACACTACCAAACACTCGGTCCGAAGCATC[CG]GGAAACAGTCCCTTGGAGCTGAAGGTCAAGAACAGAAAATGTAGCCGCTATCTTGCCTCC	CGGGAAACAGTCCCTTGGAGCTGAAGGTCAAGAACAGAAAATGTAGCCGC													0.495686	0.464052	0.0316345	237	157	394
cg10819495	-0.213883	1.14109	-3.55382	0.000641276	0.999978	-0.991133	chr8	75735552	-	46715456		ATACACCAATAAAAAATTAAACAATATACATTTAACCACACATACTACTC		II			NA	NA	NA	NA	NA	NA		OpenSea	CCCATTTTTAGGTGCACCAATGAAGAGTTAAACAGTATGCATTTGACCACACATACTACT[CG]TGATCCAACTGGGAATATATCCTAGGAAACTTGGCTGCCTGTCCAGTGTGCCACATGACC	TGCACCAATGAAGAGTTAAACAGTATGCATTTGACCACACATACTACTCG			PI15	NM_015886	TSS1500								0.675545	0.706225	0.0306798	224	171	395
cg26613778	-0.254632	2.50131	-4.08628	0.00010369	0.993103	0.225004	chr7	81805241	-	62774502		TATATCAAAACTATAATCACCAATAACCTCTTCAACACRTACATATAAAC		II			NA	NA	NA	NA	NA	NA		OpenSea	GTAGAATAGGCTATGTCAGAACTATAATCACCAATGACCTCTTCAACACGTACATATGAG[CG]AAATAAATGAAAAAAAATCTTAGTAGACCTTAAGTTTTCACTGTATTTTACCCTGCAGGA	CGCTCATATGTACGTGTTGAAGAGGTCATTGGTGATTATAGTTCTGACAT			CACNA2D1	NM_000722	Body			TRUE					0.840111	0.862346	0.0222352	43	353	396
cg05313794	0.251174	0.939738	3.46802	0.000847827	0.999978	-1.17716	chr2	1845466	+	61714453	38803413	TAAAAAACTACTTTTTTCTACCATATTCACCCCCAACATACACACATCCA	TAAAAAACTACTTTTTTCTACCATATTCACCCCCGACATACACGCATCCG	I	T	Red	NA	NA	NA	NA	NA	NA	chr2:1846426-1846908	N_Shore	GTCACCAGGAAAGACGCTGGGGGAGGTTTTGTTGACAGAGAGCGCGGGAGCGAGCGCACA[CG]GATGCGTGCATGTCGGGGGTGAACATGGCAGAAAAAAGCAGCCTCCCAGCCCCATTCTTG	CGGATGCGTGCATGTCGGGGGTGAACATGGCAGAAAAAAGCAGCCTCCCA			MYT1L	NM_015025	Body				2:1824427-1824489				0.669255	0.631909	0.037346	301	97	398
cg20793532	0.240469	0.219901	3.42568	0.000971555	0.999978	-1.26785	chr4	6344361	-	36711352		TCAAAATCTCAACCATCATCACCCCCAATTCTAAAAAATCCCAATATTCC		II			NA	NA	NA	NA	NA	NA		OpenSea	ATTCTAAGAAATCAGGGTCTCAGCCATCATCACCCCCAATTCTAAGAAATCCCAGTGTTC[CG]GGCACGGCCCTTTCTTTCCGCAGGCTCTGTGCTGTCATAAGCAGAAGTAACTGTCTATTT	CAGGGTCTCAGCCATCATCACCCCCAATTCTAAGAAATCCCAGTGTTCCG			PPP2R2C;PPP2R2C	NM_181876;NM_020416	Body;Body				4:6395262-6395404				0.553039	0.510468	0.0425714	344	54	398
cg09813986	0.317739	1.19024	3.42588	0.000970945	0.999978	-1.26743	chr5	32445429	+	27645480	71787320	CTCCAACACCTACAACACTACCTAACACCCTACTAAATAACCAATATACA	CTCCAACACCTACAACACTACCTAACACCCTACTAAATAACCGATATACG	I	C	Grn	NA	NA	NA	NA	NA	NA	chr5:32443753-32444923	S_Shore	CCGGACATACCTCTTGCTATACCCTTTCCTCGACCTGCACCCACTCCCTGAGCCATCCGG[CG]TATATCGGTCACCCAGCAGGGTGTCAGGCAGTGTTGTAGGTGCTGGAGATACGGCAGAGA	CTCCAGCACCTACAACACTGCCTGACACCCTGCTGGGTGACCGATATACG			ZFR	NM_016107	TSS1500					5:32445345-32445590	Unclassified		0.707133	0.665263	0.0418702	342	57	399
cg10121146	-0.275604	2.53677	-3.79825	0.000283038	0.999978	-0.445475	chr1	205569863	+	70602395	67635419	AACCCAAAATATAATCCATACATAAAATAACAAATAAAATAAAACACACA	AACCCAAAATATAATCCATACATAAAATAACAAATAAAATAAAACGCGCG	I	A	Red	NA	NA	NA	NA	NA	NA		OpenSea	CCTGGTTCAGACTGTTGGTAAGAGCTGTCCAGATACCCAGATGGGAAGGAAGGAGACAGC[CG]CGCGCTTCACTCCATTTGTCACCTCATGCATGGACCATACTCTGGGTTTGAGATCATTCT	CGCGCGCTTCACTCCATTTGTCACCTCATGCATGGACCATACTCTGGGTT			MFSD4	NM_181644	3'UTR								0.842179	0.86585	0.0236705	95	312	407
cg08895056	0.222923	-0.122767	3.44923	0.00090079	0.999978	-1.21751	chr17	19438253	+	35619466		CAACCCRCRCAAATACAAAATATAAACCTCAAAATCAAAAACTTATTCAC		II			NA	NA	NA	NA	NA	NA	chr17:19436788-19437692	S_Shore	GTGGTTTTCAAACCGAGAGGGTAGGACGCGGCACAAGAAGCAACTGGTATGCACTTAAGG[CG]TGAATAAGCTTTTGACTTTGAGGCCCACATTCTGCACCTGCGCGGGCTGAGGGGGGCCGC	AGCCCGCGCAGGTGCAGAATGTGGGCCTCAAAGTCAAAAGCTTATTCACG			SLC47A1	NM_018242	Body				17:19378798-19378846				0.493167	0.453974	0.0391929	325	82	407
cg16996574	0.187756	0.816462	3.55875	0.000630989	0.999978	-0.980354	chr14	103691482	-	16652464		AATTCCACTTCCRATCTATAACTTAAAATACAAATCCTCAAAATAAACTC		II			NA	NA	NA	NA	NA	NA		OpenSea	TCCTGTTGAAAGATTCCACTTCCGATCTGTAGCTTGAAGTGCAGGTCCTCAAGGTAAGCT[CG]AGGGAAAAGCAGAAACCACCTGTTGATGATGGGCACCCGAGTCATGAGTTACAGTCAGAG	ATTCCACTTCCGATCTGTAGCTTGAAGTGCAGGTCCTCAAGGTAAGCTCG									14:102761197-102761382				0.647336	0.618958	0.0283775	216	206	422
cg20633339	-0.194882	-1.57386	-3.68263	0.000418443	0.999978	-0.706414	chr19	10196919	-	68769307	16705369	AAAACACCCACCTAAATTTAAAACACAAAAACAAAAACAAAACCAAAACA	GAAACGCCCGCCTAAATTTAAAACGCAAAAACAAAAACGAAACCAAAACG	I	A	Red	NA	NA	NA	NA	NA	NA	chr19:10196696-10197857	Island	GGGTGCAGACCCGGGGCGCCCGCCTGGGTTTGGGGCGCAAGAGCAGAGGCGGAGCCAGGG[CG]GAGCCAGCGCGCCGGGTCCCCCCTGAATCGAAAGCGAAACAGGGGCCGGGGAGGAAGGGC	CGCCCTGGCTCCGCCTCTGCTCTTGCGCCCCAAACCCAGGCGGGCGCCCC			C19orf66;C19orf66	NM_018381;NM_018381	5'UTR;1stExon	high-CpG:10057757-10058085			19:10057697-10058857	19:10196404-10197998	Promoter_Associated		0.243565	0.268574	0.0250086	143	280	423
cg26467536	-0.183106	0.747182	-3.54092	0.00066895	0.999978	-1.01929	chr6	32096686	+	25638506		CTATAACCRAATATTAAAACRAAAACCTAACCATTTAAAAACCTTATACC		II			NA	NA	NA	NA	NA	NA	chr6:32097820-32098086	N_Shore	TTCTTGAGGTCAGCAGTTGCTTTTTCCAGGTTCCCAAGGGCAGCCTGGGCAACCCCCCTT[CG]GTATAAGGCCTTTAAATGGCCAGGCTCCCGCTCCAACACCCGGTCACAGCTCTGGGCTGC	CGGTATAAGGCCTTTAAATGGCCAGGCTCCCGCTCCAACACCCGGTCACA			ATF6B;ATF6B;FKBPL	NM_004381;NM_001136153;NM_022110	TSS1500;TSS1500;Body								0.615264	0.644664	0.0293996	236	188	424
cg13993734	0.215841	1.62227	3.6017	0.000547759	0.999978	-0.886045	chr19	35803340	-	29779394		ACATATCCRTATATCCCTATCAAACRTCAAAATAATCTCTAATAATATCC		II			NA	NA	NA	NA	NA	NA	chr19:35800718-35801031	S_Shelf	GGGGTTGGCGTGCATGTCCGTGTGTCCCTGTCAGGCGTCAAGGTGGTCTCTGGTGATGTC[CG]GGCCTGCCCGGCAGTGCTGGCCTTGTCTAGTCTGTCCTGTTGCAGCTCCCTTCTGTCTGT	CATGTCCGTGTGTCCCTGTCAGGCGTCAAGGTGGTCTCTGGTGATGTCCG			MAG;MAG	NM_002361;NM_080600	Body;3'UTR								0.76304	0.736123	0.0269165	188	237	425
cg14005211	-0.518783	-1.45508	-3.36676	0.00117233	0.999978	-1.39282	chr2	171676925	+	14713417	39624373	ACACACCTTTAAAACCTAAAATACAAATACATAACTAAACTAAAAACCCA	ACGCGCCTTTAAAACCTAAAATACGAATACGTAACTAAACTAAAAACCCG	I	C	Grn	rs34210682	0.014747	NA	NA	NA	NA	chr2:171676552-171676980	Island	AAGAGAGCCCGGGACCCTGCTGTAAAACAGCAAGCAGCACGTGTCCCAGGCACACTGTTG[CG]GGCCCTTAGCCTAGCTACGCATCCGCACCCCAGGCTTCAAAGGCGCGCTGGGCGCTCTAT	CGGGCCCTTAGCCTAGCTACGCATCCGCACCCCAGGCTTCAAAGGCGCGC			GAD1;GAD1	NM_000817;NM_013445	Body;Body		RDMR		2:171384759-171385226	2:171676916-171677083	Unclassified		0.253263	0.319293	0.06603	409	17	426
cg09417640	-0.180785	1.80534	-3.9968	0.000142287	0.999978	0.0137301	chr7	99723162	-	33678462		TTTTCTTTTTTTCTAAAAACTAACTAAACCCAAAATTTCAAACAACAACC		II			NA	NA	NA	NA	NA	NA	chr7:99724482-99725808	N_Shore	CTATTAAACTTTTTTCTTTTTTTCTAAAAACTAGCTGGGCCCAAAGTTTCAAACAACAGC[CG]GGCACACATAGCTAGCTGGTCGATGAGGCAGCACCCAGAATGGCCGCTGTCTTGTTAAGC	TTTCTTTTTTTCTAAAAACTAGCTGGGCCCAAAGTTTCAAACAACAGCCG			MBLAC1	NM_203397	TSS1500								0.768853	0.79026	0.0214066	51	376	427
cg16491960	0.292145	0.355105	3.38012	0.00112364	0.999978	-1.36461	chr7	56297490	+	55789378	59611357	AACTATAAAAACCACAATTCCAAACTCAAATTACAACATCAAACTAAACA	AACTATAAAAACCGCGATTCCGAACTCAAATTACAACGTCGAACTAAACG	I	C	Grn	NA	NA	NA	NA	NA	NA	chr7:56297432-56297662	Island	TGTCGGCGGCCAGCTGCCCTCGCCACCACTGCCCCTCCAACTCCATGGGACCCGGCGGCG[CG]CCCAGCCCGACGCTGTAACTTGAGTCCGGAACCGCGGCCCTCACAGCCCCAGCCCCTCCG	GGCTGTGAGGGCCGCGGTTCCGGACTCAAGTTACAGCGTCGGGCTGGGCG									7:56264908-56265141				0.578293	0.528903	0.0493907	397	31	428
cg18663886	-0.237644	2.28991	-3.76372	0.000318329	0.999978	-0.523915	chr3	100029709	-	37684432		TCATATAATAACTACTTCCCAAATATCAAATAAATAAAAAATCATCTACC		II			NA	NA	NA	NA	NA	NA		OpenSea	TGTATCACATTTCATATAGTAGCTGCTTCCCAAATGTCAAATGGATGGAGAATCATCTGC[CG]AATTCAGTGATCTCATAGTAGGAACTTCTTCTTCTGCTCCAAGATTTTAAAACCTAGAAA	CGGCAGATGATTCTCCATCCATTTGACATTTGGGAAGCAGCTACTATATG			TBC1D23	NM_018309	Body			TRUE					0.820047	0.843186	0.0231388	103	328	431
cg00622170	-0.300927	-1.39446	-3.40719	0.0010308	0.999978	-1.30724	chr4	2944594	-	42794401	69643488	CAAACATCAACAAAAACCTATAAAACACAAAAATCAATTCACTCACCACA	CAAACGTCAACAAAAACCTATAAAACGCAAAAATCAATTCACTCGCCACG	I	A	Red	NA	NA	NA	NA	NA	NA		OpenSea	AGGCCTGAGGGGCAGACGTCAGCAAAGGCCTGTAGGACGCAGGAGTCAATTCACTCGCCA[CG]GAGAAGGGCAATCCAGGCCGAGGGTGTGGCTACACGGGGAGGGGTGGAGAGTGGGTACAG	CAGACGTCAGCAAAGGCCTGTAGGACGCAGGAGTCAATTCACTCGCCACG			C4orf10;NOP14	NR_015453;NM_003703	Body;Body				4:2914307-2914491	4:2944264-2944908	Gene_Associated_Cell_type_specific		0.264344	0.304142	0.039798	360	71	431
cg14234104	-0.195556	1.86698	-3.9235	0.000183851	0.999978	-0.157397	chr11	69931467	+	53679439		CCCRCCCACCTTACCCTCTATAACAAAATCTAAAAATACTTAAAAACCAC		II			NA	NA	NA	NA	NA	NA	chr11:69933919-69934209	N_Shelf	CAGCCCTCCCCCACCCTTCCCCCTGAGCCCTCCCAAGCCACCCACCCACATGGGCGTGGT[CG]TGGCCCCTAAGCACCCTCAGACTTTGTCACAGAGGGCAAGGTGGGCGGGGCACGCACACT	CGTGGCCCCTAAGCACCCTCAGACTTTGTCACAGAGGGCAAGGTGGGCGG			ANO1;ANO1	NR_030691;NM_018043	TSS200;Body			TRUE					0.775749	0.797698	0.0219486	67	365	432
cg07665607	0.325622	-2.67593	3.83059	0.000253401	0.999978	-0.37163	chr7	73097258	-	25774417	46788375	AACACCATTCCCACTCCAATTATTCCCCATAATAAACCTAATAAAAAACA	AACGCCGTTCCCGCTCCAATTATTCCCCGTAATAAACCTAATAAAAAACG	I	T	Red	rs13244259	0.014815	NA	NA	NA	NA	chr7:73097126-73098263	Island	GCCGGGCCCTCAGGCGCCGTTCCCGCTCCAGTTGTTCCCCGTAGTGGGCCTGGTAGAAGG[CG]TCAAAGTTGAACATCGTGCGGTTGGCGCCGGGGGAGGCCCGAGAACCGTCGTGGGTCCGA	CGCCTTCTACCAGGCCCACTACGGGGAACAACTGGAGCGGGAACGGCGCC			DNAJC30;WBSCR22	NM_032317;NM_017528	1stExon;TSS1500				7:72735063-72736370	7:73096879-73098517	Promoter_Associated		0.14641	0.124006	0.0224045	85	348	433
cg07841866	0.281024	0.443915	3.38859	0.00109377	0.999978	-1.34669	chr7	150706268	+	47607313		TTATAACCTAAAACATCTTCCRCCTATACACRTAAATCAAACCTAAAAAC		II			NA	NA	NA	NA	NA	NA	chr7:150705759-150706129	S_Shore	CTAAAGCACTCTGGGGCCAGGCCCTGCTCCCTAGCTCAGGCTGCCTCATTTGCCCCTCCC[CG]CCCCCAGGTCTGATCCACGTGCACAGGCGGAAGATGTTCCAGGCTACAATCCGCTCAGTG	CGCCCCCAGGTCTGATCCACGTGCACAGGCGGAAGATGTTCCAGGCTACA			NOS3	NM_000603	Body				7:150337201-150337309	7:150704588-150706331	Unclassified		0.590916	0.547439	0.0434769	390	45	435
cg20014412	0.14594	0.494973	3.74941	0.000334152	0.999978	-0.556296	chr1	25381898	+	59790462		CRCTAAAACAAAAACRACAAACCCTAATAACTTCTAAACRACTCTCTATC		II			NA	NA	NA	NA	NA	NA		OpenSea	TCCCTCCCCGCACGCGGAGCCCTGAGCCCCTGTCCTGCCCTCCCCAGAAGTGGGAAATGG[CG]ACAGAGAGTCGTTCAGAAGCCATTAGGGCCTGTCGTCCCTGCCCCAGCGCCCACCCGCCC	GCTGGGGCAGGGACGACAGGCCCTAATGGCTTCTGAACGACTCTCTGTCG								TRUE					0.593067	0.569972	0.0230948	108	331	439
cg22519545	-0.384371	-2.76392	-3.49022	0.00078907	0.999978	-1.12933	chr5	50263682	-	65644467		CTAAAATATCTTAAAACCAAAAACCAAAAAAACTTTCCTCAATCCCAATC		II			NA	NA	NA	NA	NA	NA	chr5:50265085-50265737	N_Shore	AGGACCGTCCTCTGGAATATCTTGGAGCCAGGAGCCAGGGAGGCTTTCCTCAGTCCCAGT[CG]TTGCCTGTCGCCGCTTTCGGTTTCTCTTCCCTAATAGCACCCGCCACCCCTTTTCTCTGA	CGACTGGGACTGAGGAAAGCCTCCCTGGCTCCTGGCTCCAAGATATTCCA							DMR		5:50299138-50299564				0.121892	0.153268	0.031376	281	159	440
cg24998110	-0.222369	1.19521	-3.48709	0.000797119	0.999978	-1.13609	chr17	80377265	+	30737434		ACTAATAAAAACAATCRAACAAAAACCTCTAAACATTTTCTTATCAAACC		II			NA	NA	NA	NA	NA	NA	chr17:80376412-80376761	S_Shore	AAATTAGTTTTAATATTACCTAAAATTTGGATAAATTTCCTACAGAAGCATCATATTGTG[CG]GCCTGATAAGAAAATGTTTAGAGGCTTCTGCCCGACTGTTTTCACTAGCATAGTACATCT	CGGCCTGATAAGAAAATGTTTAGAGGCTTCTGCCCGACTGTTTTCACTAG			C17orf101;C17orf101;HEXDC	NM_024648;NM_175902;NM_173620	TSS1500;TSS1500;5'UTR					17:80377218-80377914	Promoter_Associated		0.683104	0.714442	0.0313371	282	160	442
cg25722727	0.253267	-0.0398462	3.384	0.00110986	0.999978	-1.3564	chr10	125751983	+	22650353		TAATTCTACCCCATCAATACCCTCTATAAACTACTACTAATTAAAAAACC		II			NA	NA	NA	NA	NA	NA	chr10:125751132-125751984	Island	CAGCGGCCCAGACGATGGCGCCCCCCACCCTTCTACCTACGGCGGTTTGTGCGAGGCCCC[CG]GCCCCCCAACCAGCAGCAGCCTATAGAGGGCACTGATGGGGTAGAACCAAACAGACAGCC	CGGCCCCCCAACCAGCAGCAGCCTATAGAGGGCACTGATGGGGTAGAACC													0.508748	0.465693	0.0430551	392	50	442
cg08054513	0.307703	-2.77334	3.77253	0.00030895	0.999978	-0.503951	chr13	25254482	+	49732447	55699404	CCCCTTCCCTTTAATAACCAAACACCAAAAAACAAAATCTCTAAAAAACA	CCCCTTCCCTTTAATAACCGAACGCCAAAAAACGAAATCTCTAAAAAACG	I	A	Red	NA	NA	NA	NA	NA	NA	chr13:25254393-25255093	Island	AGCTGGTCCGGCTCTGGGCGCCCAGCGGAACCAGGGCTGTACTCACCTGGATGCCGGACC[CG]CCCCCTAGAGACCCCGCCCCCTGGCGTTCGGCTACTAAAGGGAAGGGGATTCCCAGGGGG	CGCCCCCTAGAGACCCCGCCCCCTGGCGTTCGGCTACTAAAGGGAAGGGG			ATP12A	NM_001676	TSS1500				13:24152400-24153212	13:25253798-25255422	Unclassified_Cell_type_specific		0.138443	0.115899	0.0225442	100	345	445
cg00214668	0.455314	-2.24186	3.37705	0.00113467	0.999978	-1.37111	chr4	81256795	+	71723497	17656307	ACCAATCAATTAAAACCAATATAAACTTTAAACATTAATCCCACCCCCCA	ACCAATCAATTAAAACCGATATAAACTTTAAACGTTAATCCCACCCCCCG	I	A	Red	NA	NA	NA	NA	NA	NA	chr4:81257040-81257270	N_Shore	GGGTAATTCCAGAAAGTTTTCACAGGAGTGAGGCAGAAGACAGAAACTGCAACAAACCGC[CG]GGGGGTGGGATTAACGTCCAAAGCTCACACCGGCTTCAACTGATTGGCAGGAACGAAGTG	CGGGGGGTGGGATTAACGTCCAAAGCTCACACCGGCTTCAACTGATTGGC			C4orf22	NM_152770	TSS200		DMR			4:81256700-81258249	Unclassified	TRUE	0.198111	0.154793	0.0433177	400	48	448
cg25062251	0.212184	1.64984	3.60817	0.000536166	0.999978	-0.87178	chr14	101992840	+	38807321		CRACAACTACCATATTATTATTATCTCTCAAACRCTACAAAACTCACCAC		II			NA	NA	NA	NA	NA	NA	chr14:101992722-101992932	Island	CATGACTGACCGCCCAGTGCTCTGTGCGGGCGTGCGGCCTCATCCCCACCACTCCATCTG[CG]TGGTGAGCCTTGCAGCGTCTGAGAGACAATAATAATATGGCAGCTGCCGCGGAGGTGGCC	GGCAGCTGCCATATTATTATTGTCTCTCAGACGCTGCAAGGCTCACCACG									14:101061890-101062645				0.766138	0.740512	0.0256258	184	266	450
cg07540421	-0.326623	-3.17458	-4.11853	9.2422e-05	0.993103	0.301798	chr2	71115680	-	56767429	14746383	ATAAAAAAACATATATCCCTCAACTATCCTTCCAACTCTCCCTTAATACA	GTAAAAAAACGTATATCCCTCGACTATCCTTCCAACTCTCCCTTAATACG	I	T	Red	NA	NA	NA	NA	NA	NA	chr2:71115927-71116412	N_Shore	CATATTTATTTCGTGGAAGAGCGTGTATCCCTCGGCTGTCCTTCCAGCTCTCCCTTGGTG[CG]TGTGCAGGACGCACAGAAGGGTGGAGTGTGGGTTGCGATTATTTTTACACAGAAGGTGTC	CGCACCAAGGGAGAGCTGGAAGGACAGCCGAGGGATACACGCTCTTCCAC							CDMR		2:70969139-70969298				0.0947442	0.114592	0.0198479	38	417	455
cg05617413	-0.2937	-2.6267	-3.76187	0.000320342	0.999978	-0.528123	chr12	133065912	+	40685326	64759403	AACACAATATAAAAAACAACACAAACAAAAAACACACAAAAACAACTACA	AACGCAATATAAAAAACGACGCGAACAAAAAACGCACGAAAACGACTACG	I	A	Red	NA	NA	NA	NA	NA	NA	chr12:133065843-133066393	Island	TCCGAGCTCGGCCTGTCCTGGGGGTGGAGGAGGAAGTTCGCCCCGCGCCTGCCTCGCAAC[CG]CAGCCGCCTCCGTGCGCTTCCTGCCCGCGCCGCCCTCCACACTGCGCTCCGTGTCTGGCA	CGCAGCCGCCTCCGTGCGCTTCCTGCCCGCGCCGCCCTCCACACTGCGCT			FBRSL1	NM_001142641	TSS1500				12:131575847-131577808				0.133775	0.156069	0.0222941	105	351	456
cg27637606	-0.201782	2.18712	-4.26058	5.53568e-05	0.993103	0.643822	chr15	78420039	+	60727306		AAAACTAAATAAAAAACCATTTCCATTAAAACTAAAAAAACCCATAACTC		II			NA	NA	NA	NA	NA	NA	chr15:78423593-78424096	N_Shelf	GTAACCCACCTGCCTCCCATCTCCTACATGCCTGGTCTGCCTGTGCCAGCTGTCAGGAGC[CG]AGCCATGGGCCCTCCCAGCTCTAATGGAAATGGCTCTCCATCCAGCTCTGCCAGCTCAGG	GAGCTGGATGGAGAGCCATTTCCATTAGAGCTGGGAGGGCCCATGGCTCG			CIB2	NM_006383	Body		RDMR						0.812043	0.830979	0.018936	17	443	460
cg16783204	-0.541037	-0.262953	-3.32641	0.00133168	0.999978	-1.47754	chr16	89119371	+	45633340	44664407	TCAATATAACATAAATCCATATTTCCTCTTCTTCTTCCTAATAATTTACA	TCGATATAACGTAAATCCGTATTTCCTCTTCTTCTTCCTAATAATTTACG	I	T	Red	NA	NA	NA	NA	NA	NA	chr16:89119306-89119664	Island	GAACGGAGGAACCTCAGCCCGCAGCTCTGTCCCTGCCCGTCCCCATTGCTCTCCCTCTTA[CG]TAAACCACCAGGAAGAAGAAGAGGAAACACGGATCCACGTCACATCGAGGAGCCTCCTGA	TCGATGTGACGTGGATCCGTGTTTCCTCTTCTTCTTCCTGGTGGTTTACG						high-CpG:87646856-87646885			16:87646786-87648030	16:89118712-89119741	Unclassified_Cell_type_specific		0.425333	0.514256	0.0889232	458	3	461
cg10594245	0.240311	2.5551	4.09843	9.9296e-05	0.993103	0.253909	chr2	109558966	-	19757471		CTATAAACCTATAACAATTAACAAATTCCCRAAAAAACCAAATAAACCAC		II			NA	NA	NA	NA	NA	NA	chr2:109558965-109559186	Island	TCATCCCACCCCTGTGGACCTGTGGCAGTTGGCAAGTTCCCGGGGAGGCCAGGTGAACCA[CG]ATGAACCACGGCGACGGCAGGGGCCAGCGTCCCCGTCTCCCTCCCGTTCTAGAAGACATA	CGTGGTTCACCTGGCCTCCCCGGGAACTTGCCAACTGCCACAGGTCCACA			EDAR	NM_022336	5'UTR				2:108925398-108925662				0.860278	0.840541	0.0197371	41	422	463
cg23916205	0.201329	0.938923	3.48147	0.000811747	0.999978	-1.1482	chr8	11614368	-	29642497		ACTACTATCCCCRACAAATATAAATAAAACCATTAACTTACACCCATCCC		II			rs3729854	0.262924	NA	NA	NA	NA		OpenSea	TAAGGACCTCTGCTGCTGTCCCCGGCAAATGTAGATAAAGCCATTAGCTTGCACCCATCC[CG]GCTGTCTCGCAGGCTGCCGGCTGTTCGTTTGTCCCTGCCGCTGATTTGGGTGTGCTGACT	CTGCTGTCCCCGGCAAATGTAGATAAAGCCATTAGCTTGCACCCATCCCG			GATA4	NM_002052	Body				8:11651739-11652008				0.667169	0.636799	0.0303695	291	176	467
cg12516059	0.319192	-1.58476	3.37429	0.00114464	0.999978	-1.37692	chr12	63545288	+	55682499	56752381	ATAAAATCAAAAACCAAATTCAAATACAAAAACTAAATACATAAACACCA	ATAAAATCGAAAACCAAATTCAAATACAAAAACTAAATACGTAAACGCCG	I	A	Red	NA	NA	NA	NA	NA	NA	chr12:63543636-63544967	S_Shore	ATGCATTTGACTTCAACAGGCACGCTAAGCGCGGTACCTGGAAACCTCCAGTCCACGCAC[CG]GCGTCCACGCATCTAGCTCCTGCACCTGAACCTGGCTCTCGACCTCACCTCCTCCAGTCC	CGGCGTCCACGCATCTAGCTCCTGCACCTGAACCTGGCTCTCGACCTCAC			AVPR1A;AVPR1A	NM_000706;NM_000706	1stExon;5'UTR		CDMR	TRUE	12:61829969-61831712				0.268662	0.228351	0.0403102	402	67	469
cg04054921	0.219082	1.93177	3.71194	0.000379221	0.999978	-0.640738	chr11	1918276	+	51683413		AAACAAACATAAAACTACAACCCCTCTAACRATTTCTATACTTTACTTCC		II			NA	NA	NA	NA	NA	NA		OpenSea	TCTGGTGCTGCCGTGTGGCTGAAGATTGGTGGACAGAAAAGGGAAAGGAGGCACAGAAAA[CG]GAAGCAAAGCACAGAAACCGCCAGAGGGGCTGCAGCTCCATGCTTGCCTTATCTGAACAC	CGGAAGCAAAGCACAGAAACCGCCAGAGGGGCTGCAGCTCCATGCTTGCC									11:1874803-1875192				0.798971	0.776322	0.0226494	127	343	470
cg26820375	0.414965	-2.26145	3.3608	0.00119467	0.999978	-1.40537	chr1	8877710	-	64798323	56709349	AAAAACTCCAAAACACAAAAAATTACTCACAAACATCTATAAAAACAACA	AAAAACTCCGAAACGCGAAAAATTACTCGCGAACGTCTATAAAAACAACG	I	A	Red	NA	NA	NA	NA	NA	NA	chr1:8877598-8878092	Island	GCGGGAGGCTGAGGAGGCTCCGGAGCGCGGAGGGTTGCTCGCGAGCGTCTGTGGGAACAG[CG]GCACCTCCGCGATGGTGGCGGAGCCGCGGCGGAGCTGCTGCACCGACCCGCCGCCCACTC	GGAGGCTCCGGAGCGCGGAGGGTTGCTCGCGAGCGTCTGTGGGAACAGCG			RERE;RERE	NM_001042681;NM_012102	TSS200;TSS200	high-CpG:8800232-8800392			1:8800168-8800449	1:8877502-8878150	Promoter_Associated		0.19449	0.153061	0.0414283	415	59	474
cg04657639	-0.188879	-1.58605	-3.57987	0.000588666	0.999978	-0.934069	chr6	108616039	+	18618302	56663488	AACCAAAACTACAACTCCCAACATACAATAAAATAAAACAAAATAAAACA	AACCGAAACTACGACTCCCAACATACAATAAAATAAAACGAAATAAAACG	I	A	Red	NA	NA	NA	NA	NA	NA	chr6:108615961-108616398	Island	CGCCAGCGCCGGGCGGAGAATCGCCCTCCCTCCCACTGCCCAGACTGGAGCTGCCTGTTC[CG]TTCCACCCCGCCCCACCCCACTGCATGCTGGGAGTCGTAGTCCCGGCTGGCAGCGTCCGG	AGCCGGGACTACGACTCCCAGCATGCAGTGGGGTGGGGCGGGGTGGAACG			LACE1	NM_145315	TSS200				6:108722498-108723221	6:108615553-108616880	Promoter_Associated		0.241859	0.267151	0.0252917	203	272	475
cg25179685	0.22216	2.24152	3.62258	0.000511184	0.999978	-0.839958	chr8	54154528	+	71684458		TTAAACRTAAAAAACRCTCACCCTACACATAACCCTAAATACACTAAAAC		II			NA	NA	NA	NA	NA	NA		OpenSea	AGCTCCTCCTCTCAGTTGTCCCGGCTGTGGAATCATGCGCCTCTGGACCCCTAGAAGGAA[CG]TTCTAGTGCATTCAGGGTTATGTGCAGGGTGAGCGCTTCTCACGCCCAACAGCACCTATA	TGGGCGTGAGAAGCGCTCACCCTGCACATAACCCTGAATGCACTAGAACG			OPRK1	NM_000912	Body				8:54316917-54317117				0.832468	0.808404	0.0240636	179	303	482
cg23531697	0.249392	-0.367931	3.37725	0.00113394	0.999978	-1.37068	chr11	117373249	+	62782471	56637340	ACTCAACATAAAACAAAAAAACCCCAACAATCAATACTCAAAAAACTCCA	ACTCAACATAAAACAAAAAAACCCCAACGATCGATACTCAAAAAACTCCG	I	A	Red	NA	NA	NA	NA	NA	NA		OpenSea	AGGACAAAGTGCTTTTTGATAGTGTGAGGGAAGTGGCTCCCCAGGGCGGGGATTCCGGCT[CG]GAGCTCCCTGAGCATCGATCGCTGGGGCTTCCCTGTCTTATGCTGAGCTGAACGCGGGCT	CGGAGCTCCCTGAGCATCGATCGCTGGGGCTTCCCTGTCTTATGCTGAGC			DSCAML1	NM_020693	Body			TRUE	11:116878328-116878481				0.451554	0.412544	0.0390097	399	83	482
cg17992259	-0.312968	2.36691	-3.46527	0.000855381	0.999978	-1.18307	chr2	240845060	+	16619364		TCTAATAAAACTTATATCCAAAATCCAAATCTATTAACAAATAAAACCAC		II			NA	NA	NA	NA	NA	NA	chr2:240844829-240845061	Island	GGGGGTTTACGCAGCAAAGCCTGAGGTCAGTCGGATTTCCTTGCTCTTCCCCTTGGTTCG[CG]TGGTCCCATCTGTTAACAGACCTGGATCCTGGACACAAGCCCCATCAGAGGGAGAGCTTC	CTGATGGGGCTTGTGTCCAGGATCCAGGTCTGTTAACAGATGGGACCACG													0.82325	0.852973	0.0297228	305	183	488
cg20387815	-0.275272	-3.03957	-3.84065	0.000244799	0.999978	-0.348572	chr2	25391666	+	44754394	51715323	AAACAAAAACCCAACACCATCCATAATTAAATTCTTCCTAAAAACAAACA	AAACGAAAACCCAACGCCATCCATAATTAAATTCTTCCTAAAAACGAACG	I	A	Red	NA	NA	NA	NA	NA	NA	chr2:25391072-25391875	Island	CGGGGAGACGCGCTGGAAAGGGGCTGGAATTAGCACTGTCCTGCCGAAGGCGCACCTGGC[CG]CTCGCCCTCAGGAAGAACTTAATTATGGATGGCGTTGGGTCTCCGCTTAGAACGGGCGGG	AAGCGGAGACCCAACGCCATCCATAATTAAGTTCTTCCTGAGGGCGAGCG			POMC;POMC	NM_000939;NM_001035256	TSS200;TSS200		DMR		2:25244577-25245344	2:25390959-25392100	Unclassified_Cell_type_specific		0.103054	0.123256	0.020202	83	407	490
cg24751707	0.186814	1.58831	3.69729	0.000398369	0.999978	-0.67361	chr14	101830869	-	55780386		CTAAACAATTTCCATCTTACAATAAATTACTACTCTCAAATAAAAAAACC		II			NA	NA	NA	NA	NA	NA	chr14:101831291-101831695	N_Shore	TCCAGTTATCTCTAAGCAGTTTCCATCTTACAATGAATTACTGCTCTCAAATGGAAAGGC[CG]GGGGAGTGCCAGCGTAGCCCAAACGCGGCCCAAATCGCTTTGCCCTCTGAACTGCTTGTT	TAAGCAGTTTCCATCTTACAATGAATTACTGCTCTCAAATGGAAAGGCCG													0.757422	0.735187	0.0222347	137	354	491
cg14059221	0.161746	0.445364	3.52894	0.00069567	0.999978	-1.04539	chr17	28803808	+	29784379		CTACTATCCAAACCCACACTTTATAAATACATAAATTATCACAATCTACC		II			NA	NA	NA	NA	NA	NA	chr17:28804336-28804693	N_Shore	TGGGGGAAAGAACTTTACAGGAATTAAGGTTTCTACACTTCACTAGAATTAAGTCAGCAC[CG]GTAGACTGTGATAATTTATGTATCTATAAAGTGTGGGTTTGGACAGCAGATTTTATCAGG	TGCTGTCCAAACCCACACTTTATAGATACATAAATTATCACAGTCTACCG			GOSR1;GOSR1;GOSR1	NM_004871;NM_001007024;NM_001007025	TSS1500;TSS1500;TSS1500					17:28803761-28805195	Promoter_Associated		0.585857	0.559396	0.0264607	246	246	492
cg27000687	-0.309573	2.37716	-3.50889	0.000742634	0.999978	-1.08892	chr8	92130454	-	64722360		CTACATTCTATATATTAATCTAAATAACTTATAAAATTTCCTTCTAAACC		II			NA	NA	NA	NA	NA	NA		OpenSea	TAATTGCCCACCTGCATTCTGTATGTTGGTCTAGGTGACTTGTAAAATTTCCTTCTAGGC[CG]GGTGCGGTGGCTCATGCCTGTAATCCCAGCACTTTGGGAGGCTGAGGCAGGCGGATCACT	CGGCCTAGAAGGAAATTTTACAAGTCACCTAGACCAACATACAGAATGCA			LRRC69	NM_001129890	Body								0.825133	0.852878	0.0277445	265	227	492
cg05676570	0.360698	1.78882	3.33884	0.00128057	0.999978	-1.45153	chr2	135985164	+	33750357		AAAACTAAATATATCTATTAACATTCAAACATTACACATAAAACAAAACC		II			NA	NA	NA	NA	NA	NA		OpenSea	TGAGCTAGGCTTGGTTGAGGCTGGGCAACAGGCCTGGTGGCAGCACATGTAGCTATTTAT[CG]GTTTTGCTCTATGTGTAATGTCTGAATGCCAACAGACACACTCAGCTCTTCTAGACATCT	CGGTTTTGCTCTATGTGTAATGTCTGAATGCCAACAGACACACTCAGCTC			ZRANB3	NM_032143	Body			TRUE					0.785941	0.742996	0.0429446	440	52	492
cg00910029	0.518246	1.38625	3.30692	0.00141576	0.999978	-1.51822	chr2	242699048	-	48669416		CTTACRTACTTATTTACCRTCTTAAATAAAAACRTTTAACTACTAAACAC		II			rs111792955	0.181196	NA	NA	NA	NA		OpenSea	CGGACAGGTTTCTTGCGTACTTGTTTGCCGTCTTGAATGAGAGCGTTTGGCTGCTGAGCA[CG]TGCTGTGGCCCACTGTTTGGATTTGTCTACTTCACCCTGCTCTTTGTCTCTCACTTCTTG	TTGCGTACTTGTTTGCCGTCTTGAATGAGAGCGTTTGGCTGCTGAGCACG			D2HGDH	NM_152783	Body				2:242347676-242347722				0.742402	0.664648	0.0777542	485	7	492
cg07513332	0.254815	1.02208	3.37033	0.00115913	0.999978	-1.38529	chr6	167530253	+	56630437	15619449	ACAACCACTCTAAACCTAACAAATATACAAACATCCAAAACTAAAAAACA	ACAACCACTCTAAACCTAACGAATATACAAACGTCCGAAACTAAAAAACG	I	A	Red	rs6927645	0.217677	NA	NA	NA	NA		OpenSea	CCACCCCCTAGCAGAGAGGCACCCAGGGGTACCCTAACCATTGCAGAGGAGAAGGGCGAC[CG]CCTCCCAGTCCCGGACGCCTGCACATCCGTTAGGCCCAGAGTGGCTGCTCTTCCTGCTGT	CGCCTCCCAGTCCCGGACGCCTGCACATCCGTTAGGCCCAGAGTGGCTGC			CCR6	NM_004367	5'UTR			TRUE	6:167450099-167450347				0.682083	0.643483	0.0386005	405	88	493
cg26917256	0.260086	0.801548	3.36526	0.00117794	0.999978	-1.39599	chr10	130279848	+	13800319		AACCACTCTAAAATCCCCRATACAACTTTTAAACACTTAACATACTACTC		II			NA	NA	NA	NA	NA	NA		OpenSea	TATTTCAAGTGCATTGCACTCGGGCCCAAATGATGCACACAGCCCCCTCTCCAGTTTGAG[CG]AGCAGCATGCCAAGTGCTTAAAAGCTGCACCGGGGATCTCAGAGTGGCTTCTGCCCGTCT	GCCACTCTGAGATCCCCGGTGCAGCTTTTAAGCACTTGGCATGCTGCTCG									10:130169838-130169903				0.647801	0.608919	0.038882	410	85	495
cg23778149	-0.189782	-0.960894	-3.48208	0.000810156	0.999978	-1.14689	chr8	65489653	+	27708448	44698492	CAAAAAACACCCAACCCAACACCCCTAATTCTAAACTAATTAACTTATCA	CGAAAAACACCCAACCCAACGCCCCTAATTCTAAACTAATTAACTTATCG	I	A	Red	NA	NA	NA	NA	NA	NA	chr8:65491083-65491319	N_Shore	TTTGGTATCCAACACCCGGCCGAGAATGTTCCCTTTCCTGATGCTTTGGCCAACCGGCCT[CG]ATAAGCCAACCAGCCCAGAACCAGGGGCGCTGGGCTGGGTGTTCCTCGGGGACGGCGCCC	CGAGGAACACCCAGCCCAGCGCCCCTGGTTCTGGGCTGGTTGGCTTATCG			LOC401463	NR_015374	Body			TRUE	8:65652201-65652766				0.33008	0.358413	0.0283323	289	209	498
cg18441733	-0.571225	1.32407	-3.31088	0.00139827	0.999978	-1.50997	chr11	10670036	-	19722396		TAAAAAATCTAATATTCAAAAAATTCCCAAAATAACTAAATAAAACTCAC		II			NA	NA	NA	NA	NA	NA		OpenSea	TCTTGGATGGCTGAGGAATCTGGTGTTCAAAAAATTCCCAGGGTGACTGAGTGGGGCTCA[CG]TTATAGAGAGCTTTGCCTGCCTGGGCGGAGCTTAGATGTGACCTGGGATTCTTCTAGCAC	CGTGAGCCCCACTCAGTCACCCTGGGAATTTTTTGAACACCAGATTCCTC			MRVI1;MRVI1;MRVI1;MRVI1	NM_001100163;NM_130385;NM_001100167;NM_001098579	5'UTR;5'UTR;5'UTR;Body			TRUE					0.680127	0.741745	0.0616181	478	21	499
cg06240200	-0.205923	-0.935047	-3.39601	0.00106821	0.999978	-1.33096	chr3	46974965	+	69720317		AAAAACCTCATTTAACTAACACTCAACCCTAATCATTACCTAAAACAACC		II			NA	NA	NA	NA	NA	NA		OpenSea	CCACGTGTTGGCACCAAGGCCTACCCAAAGGCCCCTGAGGGATGGCTTATAAGCAGCCAA[CG]GCTGTTCCAGGCAATGACCAGGGCTGAGTGTTAGTTAAATGAGGCCCCTGCCCTGCTGGA	CGGCTGTTCCAGGCAATGACCAGGGCTGAGTGTTAGTTAAATGAGGCCCC			CCDC12	NM_144716	Body			TRUE					0.332139	0.366348	0.0342097	379	123	502
cg14406727	0.188187	0.519429	3.41055	0.00101979	0.999978	-1.30009	chr2	65577769	+	23614480		CTATCCTAACTTACAATATCACCTACCTCTTTTACATATTACRTAATCCC		II			NA	NA	NA	NA	NA	NA		OpenSea	AAGGAAAAAGCCTTGTGTTCCCAACATGTGGACTTTTTGTAAAAACAGGGCTTCCTGTCC[CG]GGATCACGCAATATGCAAAAGAGGCAGGTGACATTGTAAGTCAGGATAGGAAGGCAGAGA	TATCCTGACTTACAATGTCACCTGCCTCTTTTGCATATTGCGTGATCCCG			SPRED2;SPRED2	NM_001128210;NM_181784	Body;Body			TRUE		2:65577570-65578654	Unclassified		0.600219	0.567887	0.0323318	357	146	503
cg09375907	0.213746	2.51238	4.34573	4.05299e-05	0.993103	0.851709	chr6	49706534	-	60652339		CTTACAAAACCCATTTTCATACTATTAAAATCAATATCACAAACCATCTC		II			NA	NA	NA	NA	NA	NA		OpenSea	CCTGATATACACTTGCAAAACCCATTTTCATGCTATTAAAGTCAATGTCACAAACCATCT[CG]TCCCAGCATCGCCCCACAATCACCCCGCAAATATGGGACTTTGCTGGTATCCATTTGTAT	TTGCAAAACCCATTTTCATGCTATTAAAGTCAATGTCACAAACCATCTCG			CRISP3	NM_006061	5'UTR								0.856057	0.838843	0.0172139	13	494	507
cg05278307	0.119591	-0.154743	3.7657	0.000316201	0.999978	-0.519437	chr11	117300892	+	53768377		ACCTCTCAATAAACAATAACCTAACCTAACTAAAAACCATCTAACCCCAC		II			NA	NA	NA	NA	NA	NA	chr11:117298981-117299215	S_Shore	CCCCCTGCTGATCCTAGCCCTGCCCTGCCAGCCTCTAAGGGCATATGCTCCGGCCAGGCC[CG]TGGGGTCAGATGGTTCCCAGCCAGGCCAGGTCACTGCCTACTGAGAGGTATGACCATGGT	CCTCTCAGTAGGCAGTGACCTGGCCTGGCTGGGAACCATCTGACCCCACG			DSCAML1	NM_020693	Body			TRUE					0.480599	0.460402	0.020197	101	408	509
cg19388050	-0.278872	2.89925	-3.71922	0.000370034	0.999978	-0.624371	chr11	2562647	-	22691378		TATTTCATTTTAACTTTCTTTAACRAAACCTATATCTCTTCTCACTAACC		II			rs72847677	0.05581	NA	NA	NA	NA		OpenSea	GCGGGCGTCTTTATTTCATTTTAGCTTTCTTTAGCGGGGCCTGTGTCTCTTCTCACTGAC[CG]TTTTCTGAAACTGGCTGGGGAGGGTCAGGGATGGCTGCTGTCCTCGGGGGAGGGACTGAG	CGGTCAGTGAGAAGAGACACAGGCCCCGCTAAAGAAAGCTAAAATGAAAT			KCNQ1;KCNQ1	NM_000218;NM_181798	Body;Body				11:2518858-2519224	11:2562540-2562800	Unclassified_Cell_type_specific		0.871978	0.892901	0.0209231	121	388	509
cg14092276	0.235664	-0.0466393	3.35917	0.00120085	0.999978	-1.4088	chr14	101192852	-	38709467		ACATCTTCATAATACRCCTTTATATTTTCCTAAATATCTAACCATTACAC		II			rs28362567	0.067642	NA	NA	NA	NA	chr14:101192851-101193499	Island	GTGCTTAGTTCACATCTTCATAGTGCGCCTTTGTGTTTTCCTGGGTATCTAACCATTGCA[CG]TGTGCCCGGGACTTCAGCGATAAGTGTTTCGGTGTTCCTGCGTGCGGATTTGTGCTCTCC	CGTGCAATGGTTAGATACCCAGGAAAACACAAAGGCGCACTATGAAGATG			DLK1	NM_003836	TSS1500				14:100262127-100264174				0.505619	0.468061	0.0375573	418	94	512
cg04048893	-0.173136	1.11627	-3.57914	0.000590096	0.999978	-0.935686	chr10	132284393	-	39804431	49809378	TAAAACAACATTCCAAATCAAAATATAAATAAACCATACTCCCACTAACA	TAAAACGACATTCCAAATCAAAATATAAATAAACCGTACTCCCGCTAACG	I	A	Red	NA	NA	NA	NA	NA	NA		OpenSea	GCCTCACAGCTCTGGGGCGGCATTCCAAATCAGGGTGTGGGTGGGCCGTGCTCCCGCTGG[CG]GCTCTACCTGGGCCCCTTCTGCCTCTCCACTCCGGGCGGTGGCCAGCAGTCCGTGGCATT	CGCCAGCGGGAGCACGGCCCACCCACACCCTGATTTGGAATGCCGCCCCA									10:132174083-132174449				0.674844	0.698627	0.023783	204	310	514
cg23586629	-0.24117	2.82179	-4.10774	9.60544e-05	0.993103	0.276065	chr12	80411940	+	62674325		ACCAAATCTTTATTAAACAACAAATTCATTTCTATATAAAACCATTCACC		II			rs1245077	0.476965	NA	NA	NA	NA		OpenSea	TTCTATCAGAAGCATTGAGAAAAAAATTTCTGAAGGAGAAAAAAGTGAAATGTTACTCTC[CG]GTGAATGGTTTCACACAGAAATGAATCTGTTGTCTAACAAAGATTTGGTTTTACTGGTGC	CCAAATCTTTGTTAGACAACAGATTCATTTCTGTGTGAAACCATTCACCG								TRUE					0.868236	0.886117	0.0178804	40	477	517
cg01430344	0.226357	1.99813	3.55268	0.000643689	0.999978	-0.993637	chr2	16154047	+	62684383		CCRCAACTTACCTCTAACATTTCAAAATAATAAAAATACCTTTTCTTCCC		II			NA	NA	NA	NA	NA	NA	chr2:16153944-16154419	Island	CGGAGCAAGGGTCTTCAGAGCCCGAGATGCGCGACGCGCAGGAAGCACCAGAGAGGGTGG[CG]GGAAGAAAAGGCACCTCCATCACTTTGAAATGTCAGAGGCAAGTTGCGGCTGCGTTGAAA	CGCAACTTGCCTCTGACATTTCAAAGTGATGGAGGTGCCTTTTCTTCCCG							RDMR	TRUE	2:16071438-16071499				0.806903	0.782365	0.0245387	225	293	518
cg13565215	0.208814	0.627826	3.37805	0.00113106	0.999978	-1.36899	chr11	117668336	+	39728502		TAAAAAATAACACCAAACAACACTAAAAAACCTAAAATTCTACCCAAAAC		II			NA	NA	NA	NA	NA	NA	chr11:117666634-117668141	S_Shore	TCCTGCCTCTTTCGGACTCAGCTTACCCGGCCCCCCCACCCTCCCCAGGAGGAGCATGGA[CG]CTCTGGGTAGAATCCCAGGCTTTTCAGTGCTGTCTGGTGCTACTCCCCACCCCAAAGTTC	CGCTCTGGGTAGAATCCCAGGCTTTTCAGTGCTGTCTGGTGCTACTCCCC		TRUE	DSCAML1	NM_020693	TSS1500							TRUE	0.618721	0.58426	0.0344616	398	121	519
cg11176186	0.369891	-3.14436	3.61611	0.000522251	0.999978	-0.854243	chr20	60877067	+	46720308	33753331	AACACAAACTAAAACAAAAACAACAAATAATATTTATAACACCCCAACCA	AACACAAACTAAAACGAAAACAACAAATAATATTTATAACGCCCCAACCG	I	A	Red	NA	NA	NA	NA	NA	NA	chr20:60877499-60879008	N_Shore	TAAGAGCCCCCGCCTGGCGTCGCTGTAGGCAAATCCCAAAGAACGTGTCCCTTCAGCAGC[CG]GCTGGGGCGCCACAAACACTATCTGTTGTCTTCGCTTTAGTTTGTGTCAAAGTGACTCAA	CGGCTGGGGCGCCACAAACACTATCTGTTGTCTTCGCTTTAGTTTGTGTC			ADRM1;ADRM1	NM_175573;NM_007002	TSS1500;TSS1500				20:60310419-60310552	20:60876878-60877431	Promoter_Associated		0.113623	0.0908584	0.0227647	180	340	520
cg16704739	0.266557	-1.04353	3.36294	0.00118662	0.999978	-1.40088	chr3	125076067	+	53682366	15688401	AAACAAAAAAACACAAAAAAACTAACACACTTTAAACCTCAACAAAATCA	AAACGAAAAAACGCGAAAAAACTAACGCACTTTAAACCTCGACGAAATCG	I	T	Red	NA	NA	NA	NA	NA	NA	chr3:125075915-125076481	Island	GACTGCGCCAGCGGGGCAGGCCCAGAAGGCGCGGTATCTGGGAGGTCCGGCCGCCGCAGA[CG]ACCCCGCCGAGGCCCAAAGTGCGCCAGCTTCTCCGCGCCCCTCCGCCTCCTCCTCCTCCT	CGACCCCGCCGAGGCCCAAAGTGCGCCAGCTTCTCCGCGCCCCTCCGCCT			ZNF148	NM_021964	5'UTR			TRUE	3:126558606-126559154	3:125075605-125076554	Promoter_Associated	TRUE	0.342152	0.305554	0.0365989	414	106	520
cg07311631	-0.292949	3.25063	-4.37551	3.63146e-05	0.993103	0.924906	chr1	246160640	-	70688428		ACTAAAAAATAATCCCCAAAAAATCAACTTCATTATAAAATCAAAAATAC		II			rs36107675	0.425251	NA	NA	NA	NA		OpenSea	GGGGGATGTCAACTGGGGAGTGATCCCCAGAAAATCAACTTCATTGTGAAATCAGAAGTA[CG]AGCATCTTTCTTTCAACTGGAATTCATTGAGCATCTACTGAGCTGCTATTTCAGCACGCT	CTGGGGAGTGATCCCCAGAAAATCAACTTCATTGTGAAATCAGAAGTACG			SMYD3;SMYD3	NM_022743;NM_001167740	Body;Body			TRUE					0.897277	0.913919	0.0166421	9	513	522
cg25017952	0.195031	0.560573	3.45877	0.000873509	0.999978	-1.19703	chr10	131845016	-	42735316		RTATCCTTTCTAAAAAAAACCTTAAACCATACACCTAAAACCACCAACTC		II			NA	NA	NA	NA	NA	NA	chr10:131843516-131844219	S_Shore	GCGGGCTGGGCGTGTCCTTTCTGGGAGGGGCCTTGGGCCATGCACCTGAGGCCACCAGCT[CG]CCCACGCCGCCCGCTCACCTGCACGCGGAGGTTCATTTAATCCGTGCGTCTATGCAGCGC	TGTCCTTTCTGGGAGGGGCCTTGGGCCATGCACCTGAGGCCACCAGCTCG									10:131734904-131735066				0.605453	0.577322	0.0281317	312	215	527
cg16634544	0.242218	1.40953	3.39213	0.00108153	0.999978	-1.3392	chr3	117520653	-	45660315		CTCTCCTATAACTCAAACTATCTCTATTTTTCTCTACTAATCTATTCCCC		II			NA	NA	NA	NA	NA	NA		OpenSea	TGAAAACTCATCTCTCCTGTGGCTCAGGCTGTCTCTGTTTTTCTCTGCTAGTCTGTTCCC[CG]TGCTTCCAGTGTGAACTAGCCACAATCTCACACACACACACACACACACACACACACACA	CGGGGAACAGACTAGCAGAGAAAAACAGAGACAGCCTGAGCCACAGGAGA								TRUE					0.736243	0.703658	0.0325851	384	143	527
cg15810758	0.2268	-0.457898	3.34883	0.00124078	0.999978	-1.43055	chr6	99290349	+	51611385	38727344	CTATCTAAACCTTCACAACAACAACCAAAATCCCCAAAATAAAAAATACA	CTATCTAAACCTTCGCGACAACGACCAAAATCCCCGAAATAAAAAATACG	I	C	Grn	rs117473357	0.012153	NA	NA	NA	NA	chr6:99290279-99290771	Island	GTGCTGCCGGCCAACATCTGCTCCTTGCCCAGTCGCAAAAGAGGTACCTTGGCCTTGCCG[CG]CACCCCCCACCTCGGGGACCCTGGCCGCTGTCGCGAAGGCCCAGACAGCCTAGCTCGGCC	CTGTCTGGGCCTTCGCGACAGCGGCCAGGGTCCCCGAGGTGGGGGGTGCG							RDMR		6:99397043-99397440				0.435733	0.398662	0.0370712	429	100	529
cg00887755	-0.183364	0.667998	-3.44806	0.000904188	0.999978	-1.22001	chr2	68871696	-	11693454		AAAAACTTTAAACTTAACCCCAAAAAAACAAACTCCAAATATTTTACCTC		II			NA	NA	NA	NA	NA	NA	chr2:68870351-68871055	S_Shore	CTGGGGCGCAGAGGGACTTTAAACTTGGCCCCAAGAAGACAGGCTCCAGATGTTTTGCCT[CG]GAGGAATATGGAGAGCAGGCTTTCCTGGGGGTGGGGAGGTGGGGTCCTGGGCATCTTCCT	GGGACTTTAAACTTGGCCCCAAGAAGACAGGCTCCAGATGTTTTGCCTCG			PROKR1	NM_138964	TSS1500								0.602739	0.631123	0.0283835	326	204	530
cg02360432	0.225421	1.48547	3.40143	0.00104991	0.999978	-1.31946	chr5	1029704	-	68794442		ACCAATAAAATCCCCCACAAATACRCTCAAAATTTTTAAAAACACRACAC		II			rs10035330	0.090494	NA	NA	NA	NA		OpenSea	TCCTGTCTGTAACCAGTGAAATCCCCCACAAGTGCGCTCAGAATTTTTAGAAACACGGCA[CG]GGCTGCGTTTACATTTTCACTGTATTAGCTTTATGCGTGGAGTGCGTGATGTGCTGTTTC	CCAGTGAAATCCCCCACAAGTGCGCTCAGAATTTTTAGAAACACGGCACG			NKD2	NM_033120	Body				5:1082550-1082751				0.746217	0.715298	0.0309188	368	166	534
cg09761503	0.142575	0.842004	3.4851	0.000802257	0.999978	-1.14037	chr7	142659349	-	35748402		ATCTTCTATAACTCCAAAATCCTTCCTAATTCCACTCTAAAAACTAATTC		II			NA	NA	NA	NA	NA	NA		OpenSea	ACCATCTGTCTATCTTCTGTGGCTCCAGAATCCTTCCTGGTTCCACTCTAGGAGCTGATT[CG]GAGGACTGGGGTCCAGGAAACACCCCCCGCCCCAGTTCCTTGATCCTGGAGAAGGGGCAC	TCTTCTGTGGCTCCAGAATCCTTCCTGGTTCCACTCTAGGAGCTGATTCG			KEL;KEL	NM_000420;NM_000420	1stExon;5'UTR								0.650912	0.624654	0.0262578	285	254	539
cg23210522	-0.252679	2.94505	-3.97301	0.000154672	0.999978	-0.0420012	chr17	78803474	-	40666450	48762342	CATAAAAAACAACCCATAAACATAACAATACCACATACATAAAAAAAACA	CATAAAAAACGACCCGTAAACATAACAATACCGCGTACATAAAAAAAACG	I	A	Red	NA	NA	NA	NA	NA	NA		OpenSea	CTCGGCTCCCAGCATGGGGGGCGGCCCGTAGACATGGCAGTGCCGCGTGCATGGAGAGGG[CG]GCGTCCACGGCGACTTGTGGCCGAGTCTCAGGATGCTTCCCCCACTCTTCTTCCTCAGCC	CATGGGGGGCGGCCCGTAGACATGGCAGTGCCGCGTGCATGGAGAGGGCG			RPTOR;RPTOR	NM_001163034;NM_020761	Body;Body				17:76417915-76418093				0.877135	0.894665	0.01753	56	484	540
cg12026967	0.263872	0.813072	3.32094	0.00135479	0.999978	-1.48897	chr18	19780728	-	60715307	26602468	AATATTCAAATCAAAATAAACTCTACATAAACATCAATCTCACCTCACCA	AATATTCGAATCAAAATAAACTCTACATAAACGTCAATCTCGCCTCGCCG	I	A	Red	NA	NA	NA	NA	NA	NA	chr18:19780619-19780899	Island	ACAGCGAGCTCAAGTATTCGGGTCAAGATGGGCTCTACATAGGCGTCAGTCTCGCCTCGC[CG]GCCGAAGTCACGTCCTCCGTGCGACCGGATTCCTGGTGCGCCCTGGCCCTGGCCTGAGCC	AGTATTCGGGTCAAGATGGGCTCTACATAGGCGTCAGTCTCGCCTCGCCG			GATA6	NM_005257	Body				18:18034627-18034897				0.649639	0.610354	0.0392855	463	77	540
cg05912079	-0.242456	-2.11923	-3.45562	0.000882438	0.999978	-1.2038	chr5	38595383	-	61693309		AAAAAAAACAAACCCCAACAATACTATACCTAAAAAACRATAAATAAATC		II			NA	NA	NA	NA	NA	NA		OpenSea	AAGCCAGGAAGGAAGGAAGCAAACCCCAGCAGTGCTGTACCTGGAGGGCGATGAATGAGT[CG]CAGAGGCTCCCTTTCTGAGCTGGGATTAGGAGTTGATAATGGTCTTGCAAGTGCAGTTCT	AAGGAAGCAAACCCCAGCAGTGCTGTACCTGGAGGGCGATGAATGAGTCG			LIFR;LIFR	NM_002310;NM_002310	1stExon;5'UTR								0.179262	0.207027	0.0277652	316	225	541
cg21805936	0.22856	0.915071	3.32754	0.00132697	0.999978	-1.47519	chr12	116008178	+	44781442	19662437	ACCAACCACAACTCAAAACCTCCACTTAATATAATTAAATATAAAAACCA	ACCGACCGCAACTCGAAACCTCCACTTAATATAATTAAATATAAAAACCG	I	A	Red	NA	NA	NA	NA	NA	NA		OpenSea	TAGCAACCAATAGTGTCTATATTATGGAGAGGGGGCAGCAGGGGCGCCTGTGTCTCCAGC[CG]GCCTTCACACTCAATTACATTAAGTGGAGGCTCCGAGCTGCGGTCGGTGGGCAGTTGCTG	CGGCCTTCACACTCAATTACATTAAGTGGAGGCTCCGAGCTGCGGTCGGT								TRUE	12:114492545-114492702				0.666018	0.627158	0.0388601	456	86	542
cg16017144	0.223196	0.855754	3.35128	0.00123122	0.999978	-1.42541	chr17	77100082	+	59786372	67609311	CCTTACAACACCAACTATAAATCCCACCAAACTAACATATAAAATATACA	CCTTACAACGCCGACTATAAATCCCGCCAAACTAACGTATAAAATATACG	I	T	Red	NA	NA	NA	NA	NA	NA	chr17:77099995-77100203	Island	GGAATACAAGCACCCGTGTCGCTCAGGGGTCCTCGGGCGCGAAGCTCTCCAGGAAGGAAA[CG]CACATTTCACACGTTAGCCTGGCGGGACCTACAGCCGGCGCTGTAAGGCGGCAGCTCCGT	CGCACATTTCACACGTTAGCCTGGCGGGACCTACAGCCGGCGCTGTAAGG			HRNBP3	NM_001082575	Body			TRUE	17:74611614-74611765				0.655564	0.620302	0.0352621	427	116	543
cg01492909	0.195811	2.09229	3.7147	0.00037571	0.999978	-0.634531	chr11	2397811	+	22686336		AAAAAAACCTCCAAATATTACATCTATTTCRTCTACATCCTAATTATATC		II			NA	NA	NA	NA	NA	NA	chr11:2398223-2399598	N_Shore	GCAGGCCTGGCCCCACACCTTCCGGAAGAGCCACGGTGTGAGGCTGGCATCCCTGGGGCA[CG]ACACAACCAGGATGTAGACGAAATAGATGCAATATCTGGAGGTTCTCCTATAGGTGTCTC	GGAGAACCTCCAGATATTGCATCTATTTCGTCTACATCCTGGTTGTGTCG			CD81	NM_004356	TSS1500								0.815997	0.796244	0.019753	125	421	546
cg21904595	-0.357115	-3.61924	-4.1926	7.08291e-05	0.993103	0.479389	chr2	61991516	-	15777477	26772336	ACAATAAACAAAACAAAACAAAAATATAAACAAACTAAAACATCACCACA	ACGATAAACGAAACGAAACAAAAATATAAACGAACTAAAACGTCACCGCG	I	C	Grn	rs72819342	0.074732	NA	NA	NA	NA	chr2:61990914-61991832	Island	CGCGGCCGCGCAACGATGGGCGGGACGGGGCAGAAGTGTGGGCGAGCTGGGGCGTCACCG[CG]CGCCGGGTAGTCTCTCTCACGCCCTGGCGGGTGCGCAGGTCTCTAAACTGGGCGGAGCAA	ACGATGGGCGGGACGGGGCAGAAGTGTGGGCGAGCTGGGGCGTCACCGCG									2:61844419-61845429	2:61990788-61992004	Promoter_Associated		0.0714344	0.0877301	0.0162957	25	522	547
cg13803379	0.211116	0.225396	3.33636	0.0012906	0.999978	-1.45672	chr1	241992272	+	52614431		CTTCCCCCTCTTACTACCAACAAATACTACTACTAATAAACAATAATCAC		II			rs11811179	0.173437	NA	NA	NA	NA		OpenSea	TATTAAGAGACAGTGAGAGTTCTTTCATCTCCGGCTGAGGAGAAATCAGAAGCAGGCAAG[CG]TGATCACTGTCCATTAGCAGCAGCATTTGCTGGCAGCAAGAGGGGGAAGGGGTCCTCTGT	TTCCCCCTCTTGCTGCCAGCAAATGCTGCTGCTAATGGACAGTGATCACG								TRUE					0.551922	0.515238	0.036684	443	104	547
cg16826055	-0.284455	1.99224	-3.4302	0.000957602	0.999978	-1.25822	chr7	41087207	+	64613455		TTATAAATACAAAAACTACTAAAATATCTTATAATCAAAATAAAACAAAC		II			NA	NA	NA	NA	NA	NA		OpenSea	AAGTGGCTCAGTCCAAAGTTTAAGAAAGAAAAGAAAGAAGTGGGGAGGGGTTTAGTGGCA[CG]TCTGTCTTATTCTGACCACAAGATATTTCAGTAGCTTTTGTATTTACAATAGCAAAAATA	TGTAAATACAAAAGCTACTGAAATATCTTGTGGTCAGAATAAGACAGACG								TRUE					0.785761	0.813993	0.0282321	337	211	548
cg09470638	0.202126	-1.7292	3.55608	0.000636552	0.999978	-0.986204	chr19	15121509	+	68704366		TAACCTATAAAAACAATATACTAAAAACRCCCRTCACCATAACRATAAAC		II			NA	NA	NA	NA	NA	NA	chr19:15121590-15122143	N_Shore	CCAAAGCAAAGACTCCATCCTACTCCTCCCCCCACCTCTGGAATTCCACCTCCCTTGTTG[CG]CCCATCGCTATGGTGACGGGCGCTCTCAGTACACTGTCTCTACAGGCCAGGAAAGAGTTG	CGCCCATCGCTATGGTGACGGGCGCTCTCAGTACACTGTCTCTACAGGCC			CCDC105	NM_173482	TSS200								0.241452	0.218617	0.0228347	219	338	557
cg23441888	0.212572	2.82687	4.19501	7.02161e-05	0.993103	0.485189	chr18	77487546	+	42610305		RCTATTTAAAATTCAAAACTTCCCAAACCTTATCAAAATCCACTCTTCAC		II			NA	NA	NA	NA	NA	NA	chr18:77487345-77487547	Island	TGGGAAGCGTGGCGTTTGCGGCGTTCGTGGGATGGGAAGCGCGTGTTCACAGAGGGCCGC[CG]TGAAGAGTGGACTTTGACAAGGCTTGGGAAGTCCTGAATTCCAAACAGCGCAGATCAGCA	CTGTTTGGAATTCAGGACTTCCCAAGCCTTGTCAAAGTCCACTCTTCACG			CTDP1;CTDP1	NM_048368;NM_004715	Body;Body				18:75588280-75588535				0.881293	0.865231	0.016062	24	534	558
cg10681065	0.188205	1.42989	3.46577	0.000854014	0.999978	-1.182	chr7	100239172	+	60662385		ACTAATAAAAAACCCTCCTAAAACTCCCACAAACRATTTATCRATTTATC		II			NA	NA	NA	NA	NA	NA		OpenSea	TAGACCCCAAAGCCGCTCCATGCTTGTGTCCCCTCCTGAAGCCTGCAGGCTGTCCCCCAG[CG]ATAAACCGATAAACCGTTTGTGGGAGCCCTAGGAGGGCCCCTTATCAGTCCTGGCAGGCA	CTGATAAGGGGCCCTCCTAGGGCTCCCACAAACGGTTTATCGGTTTATCG		TRUE	TFR2;TFR2	NM_003227;NM_003227	5'UTR;1stExon			TRUE					0.737581	0.711551	0.0260302	304	255	559
cg26227569	0.212862	1.9118	3.5329	0.000686717	0.999978	-1.03676	chr4	8687039	+	70669321		AACAACAATCCCCCTTACTTCCTATTTAATCRCTATAATATAACAAAATC		II			rs11944187	0.127301	NA	NA	NA	NA	chr4:8689955-8690174	N_Shelf	ATCCTAAGTGCAGCCACCATGTCTCTCCTCGTGGTTCCACGATGGCTACCCCTACTCCAC[CG]ATCTTGTCACACCACAGCGACCAAACAGGAAGCAAGGGGGACTGCTGCTCTGGCCAAGGG	GCAGCAGTCCCCCTTGCTTCCTGTTTGGTCGCTGTGGTGTGACAAGATCG													0.796957	0.7735	0.0234565	243	318	561
cg22473806	-0.262972	3.06804	-4.20723	6.71817e-05	0.993103	0.514666	chr4	128839476	-	51785337		CTCAAACTTTATCTCCTTACTCTTTTCCCAATCCCATATTACTTCCTTTC		II			NA	NA	NA	NA	NA	NA		OpenSea	GATTTTTTTTCCTCAAACTTTATCTCCTTGCTCTTTTCCCAATCCCATGTTACTTCCTTT[CG]CCTTCTTTTGTGCCAAGATGAGCAAGGTATAATCCTCCAAAGAAGAAAATGCTCCAAAGA	TCAAACTTTATCTCCTTGCTCTTTTCCCAATCCCATGTTACTTCCTTTCG			MFSD8	NM_152778	3'UTR								0.88621	0.902192	0.0159824	23	539	562
cg11927951	-0.30225	2.17993	-3.41865	0.000993685	0.999978	-1.28284	chr10	22638314	-	23750450		TTAAACCATTACCTCTTACAACTATTTAAAAACAAATTTTAATACTTCCC		II			NA	NA	NA	NA	NA	NA	chr10:22634000-22634862	S_Shelf	ATTCTATATGTTTGAACCATTACCTCTTGCAGCTATTTAAAAACAAATTTTGATACTTCC[CG]TCTGAATAATTAGTAACACATGACTGTAATAGTAGAGATAATACATTGTTACTTCTACCA	CGGGAAGTATCAAAATTTGTTTTTAAATAGCTGCAAGAGGTAATGGTTCA			SPAG6;SPAG6	NM_012443;NM_172242	Body;Body								0.805405	0.833622	0.0282167	350	212	562
cg24092907	-0.29359	-1.61082	-3.31982	0.0013596	0.999978	-1.49133	chr7	12729367	+	43687482		TAAAATATTTTAAAAACCACATATTTTAATTACATCCTCTTAACTAAATC		II			NA	NA	NA	NA	NA	NA	chr7:12726156-12727248	S_Shelf	AATATGGGCATGTAAACTAATAAATATGCACTGGATACATATATGGATTTATGAAGAAGG[CG]ATTTAGTCAAGAGGATGTAATTAAAATATGTGGTCTCTAAAATATTCCAGTTACAAGATA	GGAATATTTTAGAGACCACATATTTTAATTACATCCTCTTGACTAAATCG			ARL4A;ARL4A;ARL4A	NM_001037164;NM_212460;NM_005738	3'UTR;3'UTR;3'UTR		CDMR						0.236512	0.273698	0.0371858	464	99	563
cg20498199	-0.168283	1.30882	-3.5182	0.000720457	0.999978	-1.06872	chr17	37885610	-	41610406		AACTAAAAAAATATTCATAAAAAATATCTCTCTCCTACCCCCAAAACCAC		II			NA	NA	NA	NA	NA	NA	chr17:37886455-37887010	N_Shore	GGGTATGAGGTGGCTGGAGAAGTGTTCATGGAGAGTGTCTCTCTCCTGCCCCCAAGGCCA[CG]GAATCTTCTATTCCTTCTTTGTACCCAAAGGGCAAAGTGGAGGCCAGGGTCTCTTTGCTA	GCTGGAGAAGTGTTCATGGAGAGTGTCTCTCTCCTGCCCCCAAGGCCACG			C17orf37	NM_032339	3'UTR					17:37885578-37887673	Promoter_Associated		0.702873	0.726705	0.0238324	257	308	565
cg04974647	0.20864	1.70632	3.45717	0.000878037	0.999978	-1.20047	chr11	32103089	+	23774424		ATCTTAACTAACCTAAACTCAACTTAACTTATCTCTACTAAACTAAACTC		II			NA	NA	NA	NA	NA	NA		OpenSea	GAGCACAGTCAAAACAAGGAAGACTGCCCAGCCAACAGCAGCTGACTGCAGAGGCATGAG[CG]AGCCCAGCCCAGCAGAGATAAGCTAAGCTGAGCCCAGGTCAGCTAAGACCCTGCACACTT	TCTTAGCTGACCTGGGCTCAGCTTAGCTTATCTCTGCTGGGCTGGGCTCG								TRUE					0.773413	0.747123	0.0262899	314	252	566
cg12250062	0.242229	2.68662	3.71975	0.000369369	0.999978	-0.623171	chr2	128175068	-	19699301		AACTTCCCTATACAATCAATAAAAACCAACRAAACAAAATCACATACCCC		II			NA	NA	NA	NA	NA	NA	chr2:128173475-128173793	S_Shore	CCTGGGTTGGTGACTTCCCTGTGCAATCAATGGAAGCCAGCGAGGCAGGGTCACATGCCC[CG]TTTAGAGGTGCAGACTTGGAGAAGGAACGTGGGCAAGTCTTCCCAGGAACAGGTAGGGCA	CGGGGCATGTGACCCTGCCTCGCTGGCTTCCATTGATTGCACAGGGAAGT			PROC	NM_000312	TSS1500			TRUE					0.870718	0.851821	0.0188963	120	447	567
cg14726821	0.326274	2.56145	3.42433	0.000975772	0.999978	-1.27073	chr11	126263452	-	29794314		ACTTTAATATACTTTAACTACACATCAAAATCAAACRAATCAAAATAAAC		II			NA	NA	NA	NA	NA	NA		OpenSea	AGGTCTTTTTGACTTTGATGTGCTTTGACTGCACATCAGAGTCAAACGAGTCAGAATAAG[CG]GGACCCCTCCACAGGCATCTCAGCCCTCCTAATTTAGCCTTTCTGAAGTGGAGCCTTGGG	CTTTGATGTGCTTTGACTGCACATCAGAGTCAAACGAGTCAGAATAAGCG			ST3GAL4	NM_006278	5'UTR			TRUE					0.861539	0.833629	0.0279095	346	223	569
cg05992079	0.166575	0.075296	3.39822	0.00106072	0.999978	-1.32628	chr9	35650999	+	57644387		ATAAAAAAAACTCAAAAACTACAAAAATAACRCAAATACAAACACAAAAC		II			NA	NA	NA	NA	NA	NA	chr9:35646744-35647265	S_Shelf	AAGTCTCTGGTTTCCGGGGAGGAAGGGGGAGGGGAGGGATGAAAAAAAGAACAAAGACCC[CG]CCCTGTGCCTGCACCTGCGCCACTCCTGCAGCTCCTGAGCTTCCCCCACCCTCGCTGCCC	CGCCCTGTGCCTGCACCTGCGCCACTCCTGCAGCTCCTGAGCTTCCCCCA			SIT1	NM_014450	TSS200			TRUE					0.523404	0.494673	0.0287307	374	195	569
cg05996795	-0.524838	-3.03889	-3.29487	0.00147019	0.999978	-1.54328	chr6	134159303	+	28727422	69767325	AAACAAAACAAATACAAATTTCAATCCAAATAAAACCTCCAAATAAAACA	AAACGAAACGAATACGAATTTCGATCCAAATAAAACCTCCAAATAAAACG	I	C	Grn	NA	NA	NA	NA	NA	NA	chr6:134159126-134159349	Island	GCCTGCTCCCCGGGGGCTGAATCCGCCCGCCCGGGGGCCAGGTGCCGTTGAGATCCCAGG[CG]CTCCACCTGGAGGCCCTATCTGGATCGAAACTCGCACTCGCCCCGCCCTCTTGTTACCAG	GGGCGGGGCGAGTGCGAGTTTCGATCCAGATAGGGCCTCCAGGTGGAGCG			MGC34034;MGC34034	NR_027029;NR_027030	Body;Body				6:134200747-134201042	6:134158712-134159661	Unclassified		0.103326	0.144193	0.0408668	508	62	570
cg16132139	0.24107	2.91298	4.29978	4.79753e-05	0.993103	0.739269	chr10	115438230	+	13715455		ATTCATATCAAAAACACAATATTTACTTTTAAAAACCACCAAATCCTTAC		II			NA	NA	NA	NA	NA	NA	chr10:115439007-115440196	N_Shore	ACAGAAAGAGAAGATGGCGTTCTTGCCTGGTATCCGACCACTAAGCATGTACTCCATTCA[CG]CAAGGATTTGGTGGTTCCTAAAAGTAAATACTGTGTCTCTGATATGAATAAAACTACAAT	CGCAAGGATTTGGTGGTTCCTAAAAGTAAATACTGTGTCTCTGATATGAA			CASP7;CASP7;CASP7;CASP7	NM_033339;NM_001227;NM_033340;NM_033338	TSS1500;TSS1500;TSS1500;TSS1500								0.887248	0.871577	0.0156707	15	556	571
cg26878190	-0.194818	2.32669	-3.84498	0.000241187	0.999978	-0.338647	chr5	1794420	-	48628360		TATCCCACACTCCAATACCAAAAATACTAAAAATTCTCTTAAACAAAACC		II			NA	NA	NA	NA	NA	NA		OpenSea	AGTGTCAAACTTGTCCCACACTCCAGTGCCAGAGGTGCTGAGGGTTCTCTTGGGCAGGAC[CG]TTCAGCAAAGTCCACAGAGCAAAATGGGAGCTTGGCCTTAAAAGGGGTGAGCAAGCAGGA	CGGTCCTGCCCAAGAGAACCCTCAGCACCTCTGGCACTGGAGTGTGGGAC								TRUE	5:1847232-1847730				0.826396	0.843691	0.0172954	81	490	571
ch.17.46186719R	0.333292	-3.5767	4.13488	8.7168e-05	0.993103	0.340864	chr17	48831720	+	61780317		AACTCATCACCAACAAAACTCATAACCACTTTTATACTTCATAAATAATT		II			NA	NA	NA	NA	NA	NA		OpenSea	CAGATTAAATGGTGTGTCTGAGACTTGCTCGAAAATAATAGAAAACAGTGGATACAAATA[CA]ATCACTCATGAAGTATAAAAGTGGTCATGAGTCTTGTTGGTGATGAGTTAACAGAGGTTA	CAATCACTCATGAAGTATAAAAGTGGTCATGAGTCTTGTTGGTGATGAGT													0.0851797	0.0691978	0.015982	35	540	575
cg24378250	-0.173736	1.24592	-3.48269	0.000808551	0.999978	-1.14557	chr11	6632529	+	69706489		CAATATATTATCCATCTCCTTCTCATCTAAATTTTTTCTCTCTAAAATTC		II			NA	NA	NA	NA	NA	NA	chr11:6632879-6633787	N_Shore	TGCTGTAGGGCATCATTGGCAATATCTGAGATGAATTTCTGGGCAGCTAAGGAGATGAGC[CG]AATTCTAGAGAGAAAAAACTTAGATGAGAAGGAGATGGACAACATACTGCACAAGCACCC	AGTATGTTGTCCATCTCCTTCTCATCTAAGTTTTTTCTCTCTAGAATTCG			TAF10	NM_006284	Body		RDMR			11:6632465-6634344	Promoter_Associated		0.693487	0.718219	0.0247315	288	290	578
cg27384476	0.219847	0.0344391	3.29731	0.00145905	0.999978	-1.53823	chr11	76367177	+	53656348	54665385	CCAACATTAACAACTCTACCTCCTAAAAATTCTTCCATTTCTCTAATCCA	CCAACGTTAACAACTCTACCTCCTAAAAATTCTTCCGTTTCTCTAATCCG	I	T	Red	NA	NA	NA	NA	NA	NA		OpenSea	GTTTAGAATTTCCCTTTGCAGACTGGGAGCCAGGAGCAGGAATGGGGAGGTGAGAGGGCA[CG]GACCAGAGAAACGGAAGAATCTCCAGGAGGCAGAGCTGCCAACGCTGGGCCCAGGGGCTG	CGGACCAGAGAAACGGAAGAATCTCCAGGAGGCAGAGCTGCCAACGCTGG								TRUE					0.520272	0.480894	0.0393778	502	76	578
cg24694501	0.23309	0.714548	3.30947	0.00140447	0.999978	-1.5129	chr2	16154177	-	20639435		TACACACRCAAAAATTTTTAAAAACCCCTATAAACAAAACCACAAACTCC		II			rs56161644	0.303474	NA	NA	NA	NA	chr2:16153944-16154419	Island	AAGAAAACACCTGCACACGCAGAAATTTTTAAAAACCCCTGTAAGCAAAACCACAAGCTC[CG]AAGGTAAAGCCGGAGGAGCTGTCCCTGAGTCGCGCCCGGGAGCCCCTCCGCTGTCAGTAG	CGGAGCTTGTGGTTTTGCTTACAGGGGTTTTTAAAAATTTCTGCGTGTGC							RDMR		2:16071628-16071929				0.633642	0.596308	0.0373338	481	98	579
cg20642417	0.133623	1.88709	4.0913	0.000101853	0.993103	0.236937	chr6	29577082	+	53764498		CCCTAATCATCAAAACATTCCRCTTCCTATCACAAAAACTCTTTATCTCC		II			NA	NA	NA	NA	NA	NA		OpenSea	AGATGTTAAAGGACAGACAGACAACAGCTAGGACAATGCCCAGGCTGGAGAGAACTGAGA[CG]GAGATAAAGAGTTTCTGTGACAGGAAGCGGAATGTCTTGATGACCAGGGTCTGGTCAGCT	CGGAGATAAAGAGTTTCTGTGACAGGAAGCGGAATGTCTTGATGACCAGG			GABBR1;GABBR1;GABBR1	NM_021904;NM_021903;NM_001470	Body;Body;Body								0.79256	0.776589	0.0159709	42	541	583
cg26986928	0.159312	0.450391	3.45069	0.000896561	0.999978	-1.21437	chr5	3059243	-	59634333	58724389	CCAAAATCAAACTATCACACATCTACTCCTACTACAACTCTAAAACCTCA	CCAAAATCAAACTATCACGCGTCTACTCCTACTACAACTCTAAAACCTCG	I	C	Grn	NA	NA	NA	NA	NA	NA		OpenSea	AAGGATGGGGCGCCAGGGTCAGGCTGTCACGCGTCTGCTCCTGCTGCAGCTCTGAAGCCT[CG]CAGGAGCCAGCCCTGGAGAGCAGGGCCCTCGCTCAGACACCCGCGGGCTTCCTGTGAGTA	CCAGGGTCAGGCTGTCACGCGTCTGCTCCTGCTGCAGCTCTGAAGCCTCG									5:3111999-3112289				0.586434	0.560702	0.0257325	322	261	583
cg14414100	-0.274534	-2.71202	-3.52513	0.000704362	0.999978	-1.05367	chr9	19547530	-	51739449		ACCAATTAAAAAATTAAAAACTTTTAATCTTCCCTAACAACTTCTTTAAC		II			NA	NA	NA	NA	NA	NA		OpenSea	TTCCAAAAGTTACCAGTTAGGAAGTTGGGAGCTTTTGATCTTCCCTAACAGCTTCTTTGA[CG]TTTCAACTAGGATTACCAAGAGGATAAACACTTTGCCAGCCCTTTCTCTGAGAGTTCCTC	CGTCAAAGAAGCTGTTAGGGAAGATCAAAAGCTCCCAACTTCCTAACTGG	TRUE		SLC24A2	NM_020344	Body								0.126522	0.149449	0.0229264	249	336	585
cg09519504	0.156616	-0.722738	3.49026	0.000788947	0.999978	-1.12922	chr11	117314759	+	47754305	38793507	CACTAAAAAACCCCAATTCTACTTCTTAAAACCTCTTTACCTCTACCCCA	CGCTAAAAAACCCCAATTCTACTTCTTAAAACCTCTTTACCTCTACCCCG	I	C	Grn	NA	NA	NA	NA	NA	NA		OpenSea	TAGGTGGGCGATCCGGTAGAAGAGCTGCTCTGGACTCGTCTCGTACTCGCTGGGAGCCTG[CG]GGGCAGAGGCAAAGAGGCTCTAAGAAGCAGAACTGGGGCCCTCCAGCGTCCAAATCTTCC	CGGGGCAGAGGCAAAGAGGCTCTAAGAAGCAGAACTGGGGCCCTCCAGCG			DSCAML1	NM_020693	Body			TRUE	11:116819842-116819970	11:117313945-117314894	Unclassified_Cell_type_specific	TRUE	0.386558	0.362576	0.0239823	280	306	586
cg11429111	0.213567	2.95101	4.24869	5.78032e-05	0.993103	0.614977	chr5	134813329	+	24674439	22806320	CTCTTCAAAAACATCAAATTATAAAACCACATAAAACAACCCATCTACCA	CTCTTCGAAAACATCAAATTATAAAACCGCGTAAAACAACCCATCTACCG	I	A	Red	NA	NA	NA	NA	NA	NA		OpenSea	GGGCCAGAGCCCGGGGAGCCGGGTCACAGGCAGCCTTAGGGGGGAAAGTGAGAAGTTAGC[CG]GCAGATGGGCTGCTCCACGCGGCCCTATAACCTGATGCCTCCGAAGAGGGGCCCTAGCAA	CGGCAGATGGGCTGCTCCACGCGGCCCTATAACCTGATGCCTCCGAAGAG									5:134841112-134841272				0.89006	0.874835	0.0152249	18	570	588
cg27268316	-0.231913	2.59444	-3.70284	0.000391004	0.999978	-0.661156	chr19	49699496	+	68725496		TATATCTAACCTCTAACCTCTAAAATCTCCRATCAAAAAATAAATTAATC		II			NA	NA	NA	NA	NA	NA	chr19:49699698-49700070	N_Shore	TTTTGTAGAGATGAGGTTTTGCCATGTTGGCCAGGCTGGTCTCCAACTCCTCGGCTCAAG[CG]ATCAATCCACCTCTTGACCGGAGATTTCAGAGGTCAGAGGTTAGATACAAGAGTCAAAAC	GTATCTAACCTCTGACCTCTGAAATCTCCGGTCAAGAGGTGGATTGATCG			TRPM4	NM_017636	Body								0.849568	0.868148	0.0185802	135	453	588
cg27423692	0.172404	0.26165	3.39259	0.00107994	0.999978	-1.33822	chr10	134886006	-	74713341	63754443	ACAAATACTAACAAACCTACACTCACCACAAAAAATCCAACTAAAAAACA	ACGAATACTAACGAACCTACACTCACCACAAAAAATCCGACTAAAAAACG	I	A	Red	NA	NA	NA	NA	NA	NA	chr10:134884426-134884646	S_Shore	CCTGCAGCTGCCACGGATGCTGACGGACCTGCACTCACCACAGGAGGTCCGGCTGGAGGG[CG]GGTCTGGGCAGGGGCCACCGGGTCTGTCCTGCCCGGGGGACTGCCTGGCCCTGCCTGGTT	CGCCCTCCAGCCGGACCTCCTGTGGTGAGTGCAGGTCCGTCAGCATCCGT									10:134735896-134736124				0.555261	0.526878	0.0283829	383	205	588
cg24769432	-0.234236	2.09259	-3.50779	0.000745303	0.999978	-1.09131	chr2	157346486	+	24628329		TCTAAAAAAAACCTTAAAATAACCATAAACCCTATATTAACTAAAAAACC		II			NA	NA	NA	NA	NA	NA		OpenSea	CTTCTCTCCCCTCCCCTCCTTTCTTCCCTCCCACTACCCCCTCTCCCTGACGCAGGGTTT[CG]GTCTCCCAGTTAATATAGGGCCTATGGCCATTCCAAGGCTTCTCCTAGAACCTCCAGATC	CGGTCTCCCAGTTAATATAGGGCCTATGGCCATTCCAAGGCTTCTCCTAG			GPD2;GPD2	NM_000408;NM_001083112	Body;Body			TRUE					0.799608	0.822887	0.0232787	267	322	589
cg01851450	0.14555	0.00582552	3.45868	0.000873762	0.999978	-1.19722	chr6	146864335	-	14770433		CACTCAAAAAATTAAAAACAAAACTACCAACCCAATATTATCCRTCCTTC		II			NA	NA	NA	NA	NA	NA	chr6:146864481-146865426	N_Shore	CTACGGAGGTTCACTCAAAAAGTTAAAAACAGAACTACCAGCCCAGTGTTATCCGTCCTT[CG]TTAAGTTCAAAGTCACGGTGCCACTTCCTTTCCCATCTAAAGGGGACTGCTCGCGACCCA	CGAAGGACGGATAACACTGGGCTGGTAGTTCTGTTTTTAACTTTTTGAGT			RAB32	NM_006834	TSS1500				6:146906021-146907119				0.510176	0.484952	0.0252238	313	276	589
cg10920230	-0.229666	-1.80048	-3.45672	0.000879318	0.999978	-1.20144	chr7	150757210	+	62625503		CTCAACCCRAAAATTAAAAATAAAAACCCCRAACAACCCCCAATCTAAAC		II			rs34606713	0.022034	NA	NA	NA	NA	chr7:150757031-150757297	Island	TGGCTCCAGACCACCCCTCCCCTCCGGCCCCCCCGCATAGTCCTTCAGTCCCGTCCGGGG[CG]CCCAGACTGGGGGTTGCCCGGGGCCCCCATCCCCAATCTCCGGGTTGAGAGGCGAAGCCA	TCAACCCGGAGATTGGGGATGGGGGCCCCGGGCAACCCCCAGTCTGGGCG			SLC4A2	NM_003040	5'UTR				7:150387213-150388540	7:150756925-150758072	Promoter_Associated		0.215831	0.241075	0.0252441	315	274	589
cg04027059	-0.156587	1.00551	-3.5578	0.000632967	0.999978	-0.98244	chr16	3482078	+	53628489		ACTTAAATTCCRAATAACRAATATAATAAATAAAACTCCCAAAAAACCTC		II			NA	NA	NA	NA	NA	NA		OpenSea	TTCCGCTGACCCGTGCAGTTGGTGGCCAAGCTGGAGACCCAGGATCTCCCTGAGGCCGCG[CG]AGGTCTTCTGGGAGTCCTACTCACCACATCCGCTACTCGGAATCCAAGCTTTAAGTGGCA	CTTGGATTCCGAGTAGCGGATGTGGTGAGTAGGACTCCCAGAAGACCTCG									16:3421786-3422166				0.659041	0.680596	0.0215543	218	373	591
cg24284859	-0.253273	2.81486	-3.65855	0.000453525	0.999978	-0.760127	chr11	70936231	+	70714351		ATCTAACTAAAATAAACCTATTATCTAAATATATTACCCTATTAACTACC		II			NA	NA	NA	NA	NA	NA		OpenSea	CAGGAGCAGGAACAGTACCACAACAAAAGCATATTCTCTTTAGTCGAAAGACTAGGAAAG[CG]GCAGCTAACAGGGCAATATATTTAGACAACAGGTCTACTCCAGCCAGACACTGCAGAAAA	CGGCAGCTAACAGGGCAATATATTTAGACAACAGGTCTACTCCAGCCAGA			SHANK2	NM_012309	TSS1500								0.866734	0.885847	0.0191135	156	437	593
cg00259388	0.190234	2.66526	3.88554	0.000209717	0.999978	-0.245292	chr8	98907498	+	71619493		RAATTAATCRAAAAACCAAAACCTCTCATAACTTCTAACATCTACTTTCC		II			NA	NA	NA	NA	NA	NA		OpenSea	GATTTCTACATCCCAAAACAATACCTTTAATTGACTTTTATTGGCCTCCTCTGTGAAGGA[CG]GAAAGCAGATGCCAGAAGCCATGAGAGGCTCTGGCTCTCCGACCAACCCGTGGAAGCCAC	CGGAAAGCAGATGCCAGAAGCCATGAGAGGCTCTGGCTCTCCGACCAACC			MATN2;MATN2	NM_030583;NM_002380	Body;Body			TRUE					0.868793	0.852502	0.0162917	71	523	594
cg03178820	0.314417	-3.02695	3.57289	0.000602356	0.999978	-0.949396	chr2	190627986	-	44685360		TAACAAAATTACCAAAAAACRAAAATATTTCTCATCRAACAATATAAACC		II			NA	NA	NA	NA	NA	NA		OpenSea	GCGGCGCCCCCTAGCAGGGTTACCAAAGAACGGAAGTGTTTCTCATCGGACAGTGTAAAC[CG]TTTCTCCCACTTCACTAGGAAGAAAGGGGCTGGCTTATTTTTACAATTAAAAAAAAAAAA	CGGTTTACACTGTCCGATGAGAAACACTTCCGTTCTTTGGTAACCCTGCT			OSGEPL1	NM_022353	TSS200					2:190627019-190628238	Promoter_Associated		0.119814	0.0987748	0.0210392	209	386	595
cg04167833	0.128421	-0.0747315	3.55087	0.000647513	0.999978	-0.997585	chr5	169724831	-	69610376		AAAAAACAACRACTTCCTCTACRAACAAATATAATCTCTTCTCAAAAAAC		II			NA	NA	NA	NA	NA	NA		OpenSea	AGCCAGATCCCAGAAAGCAACGGCTTCCTCTGCGAACAAATATGGTCTCTTCTCAGAAAA[CG]ACTCAGCTAGTTTCCTTTACCACTTCCTCTGCTGGGCTCTAAATAAGTAAACAAGGAAGC	GAAAGCAACGGCTTCCTCTGCGAACAAATATGGTCTCTTCTCAGAAAACG			LCP2	NM_005565	TSS200	low-CpG:169657224-169657871				5:169724685-169725119	Promoter_Associated		0.494956	0.473349	0.0216071	228	372	600
cg21041701	-0.200547	1.70514	-3.48187	0.000810688	0.999978	-1.14733	chr12	31942768	-	52695349		AACCCTATAAAAACCTATAACCATTTAATATAAACTCTAATCTATAAAAC		II			NA	NA	NA	NA	NA	NA	chr12:31944806-31945230	N_Shelf	CTCTACCTGGTGGCCCTATGGGAGCCTATGGCCATTTAGTGTGAACTCTAGTCTGTAAAA[CG]AATATCATGCCCACTATATCGACTAATCAAGCCCATCCTGTACCATAGTCTGGAAAAGGC	CGTTTTACAGACTAGAGTTCACACTAAATGGCCATAGGCTCCCATAGGGC													0.755227	0.778933	0.0237056	290	311	601
cg03962846	-0.295883	3.27008	-3.88823	0.000207776	0.999978	-0.239083	chr7	39053253	+	36603457		ATACTACCTTCTTTATACTATAAAACACTACAAAATATCATTATCATACC		II			NA	NA	NA	NA	NA	NA		OpenSea	GTCTTGTTCTGTAGAGTTTTAGACTTTTAGAATGCTGGAGATAATATAATCAATTGATTC[CG]GCATGATAATGATATTTTGCAGTGTTCCATAGCATAAAGAAGGCAGCATTTATGTTAAAC	CGGCATGATAATGATATTTTGCAGTGTTCCATAGCATAAAGAAGGCAGCA			POU6F2;POU6F2	NM_007252;NM_001166018	Body;Body								0.898314	0.91439	0.0160761	70	532	602
cg25386579	0.157881	1.34628	3.52437	0.000706109	0.999978	-1.05532	chr6	139571728	-	57801418		AATCCTAATCACCTTCTATCACAAAATCTTTTCATTTATATTCTCAACCC		II			NA	NA	NA	NA	NA	NA		OpenSea	TACCCCCAGCAGATCCTGGTCACCTTCTATCACAAAATCTTTTCATTTGTATTCTCAGCC[CG]GCCTCTTTTGTTAACTTTTTTCCTTAATTTCTCCCCATTCTTTTTCCAACTTATCAGTAA	CGGGCTGAGAATACAAATGAAAAGATTTTGTGATAGAAGGTGACCAGGAT			TXLNB	NM_153235	Body					6:139571429-139572143	Unclassified	TRUE	0.725064	0.70274	0.0223241	252	350	602
cg11465939	0.222218	2.77834	3.6757	0.000428263	0.999978	-0.72189	chr22	23923462	-	24610422		CTTCCTCCTAAACRATAAATACATCATATCATAACTTCTAACAAACCCCC		II			rs131422	0.279275	NA	NA	NA	NA		OpenSea	AAGGCCAGTAGCTTCCTCCTGAGCGGTGAGTGCATCATGTCATGGCTTCTGACAGGCCCC[CG]GTCCTCTCCCAGCCCAGCATCCCCGACCCTCTCCCAACATCTCGCGACCCTGTGCTTTGG	CGGGGGCCTGTCAGAAGCCATGACATGATGCACTCACCGCTCAGGAGGAA			IGLL1;IGLL1	NM_152855;NM_020070	TSS1500;TSS1500								0.878036	0.859533	0.0185038	146	458	604
cg00558975	0.197491	1.14517	3.3539	0.00122105	0.999978	-1.41989	chr5	175580027	-	30648346		AAAAAAACATCTTATTTTACCAAATAAACAAAAATCACTAAAAAACATAC		II			NA	NA	NA	NA	NA	NA		OpenSea	GAAAGGGGAGGGGGAGGGCATCTTATTTTACCAGGTAAACAAGGGTCACTAAGAGGCATG[CG]GGAAGACTAAACCCATCCACCAATGCTAGTTTGCAAGTAGCAATCACAAAACCAGGACAC	GGAGGGCATCTTATTTTACCAGGTAAACAAGGGTCACTAAGAGGCATGCG								TRUE					0.698266	0.668286	0.0299796	423	182	605
cg00346244	-0.290769	2.97679	-3.6738	0.000430987	0.999978	-0.726121	chr16	87468226	+	50677432	64787488	CCATAACCTTATATAAACACTAACACCCATAAAAAAAACTCTAAAAAACA	CCGTAACCTTATATAAACACTAACGCCCGTAAAAAAAACTCTAAAAAACG	I	A	Red	NA	NA	NA	NA	NA	NA		OpenSea	AGAACTGTGAATGTGACACTTCCTGCAGGCACCCAAAGACCGCCTGGTCTCCTGCACCAC[CG]TTCTCCAGAGCCCTCTCCACGGGCGCCAGTGCTCACACAAGGTCACGGCCACCTCAAAAA	CCGTGACCTTGTGTGAGCACTGGCGCCCGTGGAGAGGGCTCTGGAGAACG			ZCCHC14	NM_015144	Body				16:86025707-86025753				0.878281	0.896742	0.0184612	148	459	607
cg23082281	0.210311	-0.349507	3.32929	0.00131968	0.999978	-1.47153	chr1	213032677	+	23773328		AAAAAATTTTATCCTTACAAAAAAATTTATAACCCACTTCAATCCAAAAC		II			NA	NA	NA	NA	NA	NA	chr1:213031359-213032119	S_Shore	TGAACTGCCCCAGGAGGTATTTGTCTATAAAAGAGGAGATGAAGCCGTTGAATAGGAGGC[CG]TCTTGGATTGAAGTGGGCTATAAATTTCTTTGTAAGGACAAAATTTTCCAAACGACCTTG	GAAAATTTTGTCCTTACAAAGAAATTTATAGCCCACTTCAATCCAAGACG			LQK1;FLVCR1;LQK1	NR_027286;NM_014053;NR_027285	TSS1500;Body;TSS1500					1:213030985-213032716	Promoter_Associated		0.45176	0.420349	0.0314107	450	158	608
cg17303540	-0.26078	-0.355307	-3.27073	0.00158526	0.999978	-1.59332	chr5	140808068	-	30614383		AACTACAATAAAAAAACTTTACTTTATTCCTACAATCTATATATTCCCTC		II			NA	NA	NA	NA	NA	NA	chr5:140807339-140807788	S_Shore	GGGTTTTTCCCAACTACAATGAGGGAACTTTGCTTTATTCCTGCAATCTGTATGTTCCCT[CG]GATTCTAGAAAAAGAAGATTTAATTTTCTCACCATGACACCAGAAACAGTCCCCCCACAA	ACTACAATGAGGGAACTTTGCTTTATTCCTGCAATCTGTATGTTCCCTCG			PCDHGA4;PCDHGA11;PCDHGA11;PCDHGA9;PCDHGA1;PCDHGB1;PCDHGB6;PCDHGB3;PCDHGB7;PCDHGA6;PCDHGA8;PCDHGA10;PCDHGA5;PCDHGB4;PCDHGA3;PCDHGA2;PCDHGB2;PCDHGA7;PCDHGB5	NM_018917;NM_032092;NM_018914;NM_018921;NM_018912;NM_018922;NM_018926;NM_018924;NM_018927;NM_018919;NM_032088;NM_018913;NM_018918;NM_003736;NM_018916;NM_018915;NM_018923;NM_018920;NM_018925	Body;Body;Body;Body;Body;Body;Body;Body;Body;Body;Body;Body;Body;Body;Body;Body;Body;Body;Body								0.424838	0.465307	0.0404691	545	64	609
cg20312821	0.285451	-2.09838	3.34817	0.00124337	0.999978	-1.43194	chr15	65669563	+	30690452	15701302	AACAACAACCTAAAAAACAAAAACCAAAACTCTAACAACTACACTAAACA	AACAACAACCTAAAAAACGAAAACCGAAACTCTAACGACTACACTAAACG	I	A	Red	NA	NA	NA	NA	NA	NA	chr15:65669310-65670617	Island	CTGTCTCTCCCGCGCACTCCTCAGCCCAGTACCAGCTCCAAATGCAGGTCGTGCCATCTC[CG]CCCAGTGCAGCCGTCAGAGTCCCGGTCTCCGCTCCCCAGGCTGCTGTCCCCTGTCTTGGC	CGCCCAGTGCAGCCGTCAGAGTCCCGGTCTCCGCTCCCCAGGCTGCTGTC			IGDCC3	NM_004884	Body		CDMR		15:63456017-63457704	15:65668753-65670592	Unclassified_Cell_type_specific	TRUE	0.203512	0.173378	0.0301337	430	180	610
cg03946923	0.286208	-1.89824	3.32808	0.0013247	0.999978	-1.47405	chr4	109093221	+	12687495		TTAAAAACTCACTAAACTATCTATAACCRACTCRAATTAACAACAAAATC		II			NA	NA	NA	NA	NA	NA	chr4:109093038-109094546	Island	GAGCGGGCAGGAGAGACAGGGTAGTGACCCCCACTCACACCAGAAAACCCCTCCCCCCGG[CG]ATTTTGCTGCCAACTCGAGTCGGCTACAGACAGTCCAGTGAGTCCTTAATTACAAGGACG	TAAGGACTCACTGGACTGTCTGTAGCCGACTCGAGTTGGCAGCAAAATCG			LOC641518;LOC641518	NR_029373;NR_029374	TSS200;Body			TRUE	4:109312028-109314020				0.226342	0.194702	0.0316399	454	156	610
cg09965499	-0.280598	3.03725	-3.69171	0.000405899	0.999978	-0.686104	chr8	110563678	+	63747409		CTAAAATACCTCAACACACATTTTAAACATCATAACTCTTAAATATAATC		II			NA	NA	NA	NA	NA	NA		OpenSea	AGGTAAGTCATTTGCTTTAGGACATCATCTGTAGACTTCAGTTCCTTCTGTTTTGTCACA[CG]ATCATACCCAAGAGCTATGATGTCTAAAATGTGTGCTGAGGCACCTCAGGGCTTTACATG	TGAGGTGCCTCAGCACACATTTTAGACATCATAGCTCTTGGGTATGATCG			EBAG9;EBAG9	NM_004215;NM_198120	Body;Body								0.882806	0.90077	0.0179642	139	473	612
cg06824795	0.236862	1.2581	3.29663	0.00146214	0.999978	-1.53963	chr20	31766130	-	47686491		AAATAAAAAAATTTACAAACCTAACTATATCCTCTAAACACTTTTCCTTC		II			NA	NA	NA	NA	NA	NA		OpenSea	CTGGTGGGGGCAGGTGGGGGAATTTGCAGGCCTGGCTGTATCCTCTGAGCACTTTTCCTT[CG]GAGGTGAAAGCTTCTCCTTAGGAGGTCAGCTGGAGCTTCCTCCTCTACTAATCAGCCTGG	GGTGGGGGAATTTGCAGGCCTGGCTGTATCCTCTGAGCACTTTTCCTTCG			C20orf70	NM_080574	Body			TRUE					0.715936	0.680653	0.0352832	504	115	619
cg23270423	-0.188624	1.9892	-3.57446	0.000599244	0.999978	-0.945942	chr14	55966172	+	47706326	28659403	CACTTTACAAACATACCCTAAATTCTTTCTTAAACAAAATCCACAAACCA	CACTTTACAAACGTACCCTAAATTCTTTCTTAAACGAAATCCACGAACCG	I	T	Red	rs77649198	0.036892	NA	NA	NA	NA		OpenSea	AAGTGCACATTTCACTTCTTCTTGTTACCGGAAAGGGGTCCCAATCCAGACCCCAAGAGA[CG]GTTCGTGGATCTCGCCCAAGAAAGAATTCAGGGCACGCCTGTAAAGTGAAAGCAAGTTTA	CGGTTCGTGGATCTCGCCCAAGAAAGAATTCAGGGCACGCCTGTAAAGTG								TRUE					0.790363	0.810229	0.0198656	207	414	621
cg12070036	0.278219	-2.5106	3.48285	0.00080812	0.999978	-1.14522	chr19	21511996	+	28706378	65728379	TAAAACTCCAAAACCCTCTAAAAACCTAAAAATAATAAAAATACCATCCA	TAAAACTCCAAAACCCTCTAAAAACCTAAAAATAATAAAAATACCGTCCG	I	A	Red	NA	NA	NA	NA	NA	NA		OpenSea	GAGTCCCGCCACAGCCACTTCCCACAGGTTTCAACCAGCCCTTCCCCTCTCTCGGGATGT[CG]GACGGCACTCTCACCATTTCTAGGCTTCCAGAGGGTCCTGGAGTCTTAGCTGTGGATCTC	CGGACGGCACTCTCACCATTTCTAGGCTTCCAGAGGGTCCTGGAGTCTTA			ZNF708	NM_021269	Body				19:21303584-21303841	19:21511615-21512500	Promoter_Associated		0.160327	0.137339	0.0229882	287	334	621
cg00560747	0.163008	2.00014	3.5839	0.000580907	0.999978	-0.925222	chr1	31279227	+	13785331		CTCTACTTCTTACCTAAATAATCTTAAACAACTACTCATTATTAAACCTC		II			NA	NA	NA	NA	NA	NA	chr1:31280121-31280512	N_Shore	AGTGACCTCAGCTAACATAACCAAGGAAGCAGGAGGTGCCCACCTGACAGATGAGGAACT[CG]AGGCTCAATAATGAGCAGCTGTCCAAGACCACTCAGGCAAGAAGCAGAGATGAGAACTCA	CGAGGCTCAATAATGAGCAGCTGTCCAAGACCACTCAGGCAAGAAGCAGA													0.806181	0.786692	0.0194895	200	427	627
cg01050225	-0.25439	2.59873	-3.52609	0.000702157	0.999978	-1.05158	chr16	7703947	+	46735485		AAAAAAAACTAATACAAAAAAACCCACCCAAAAAACTACCCCACTTACCC		II			NA	NA	NA	NA	NA	NA	chr16:7703811-7704090	Island	TCGCACCGTGTACAACACCTTCAGGGCCGCGGCGCCCCCGCCCCCGATCCCGGCCTACGG[CG]GGTAAGTGGGGCAGCCTCCTGGGTGGGCCTCCCTGCACCAGCCCTCCCTCCCCAGAGGCA	GGGAGGGCTGGTGCAGGGAGGCCCACCCAGGAGGCTGCCCCACTTACCCG			A2BP1;A2BP1;A2BP1;A2BP1;A2BP1;A2BP1	NM_001142334;NM_145893;NM_001142333;NM_018723;NM_145891;NM_145892	Body;Body;Body;Body;Body;Body				16:7643846-7643949				0.84844	0.86959	0.0211502	247	381	628
cg21684845	0.151254	-0.166202	3.45112	0.000895314	0.999978	-1.21345	chr18	19755501	+	62651441		TCATAAAAATACTACAACTTACAACACATCACAAAAATTTATTCTTCTCC		II			NA	NA	NA	NA	NA	NA	chr18:19756794-19757080	N_Shore	CAGTGTCCTTGAAGACCTGAGCATTTTACTGATTACCGTAGTCAATAGTGGCTTTTAGGG[CG]GAGAAGAATAAACCTTTGTGATGTGTTGTAAGTTGCAGTATCCCCATGACAACTTTGAAC	CATGGGGATACTGCAACTTACAACACATCACAAAGGTTTATTCTTCTCCG			GATA6	NM_005257	Body		RDMR						0.480026	0.456116	0.0239102	321	307	628
cg22482690	0.219055	2.55241	3.63412	0.000491956	0.999978	-0.814386	chr17	47019901	+	62603481		AAATACAACTCCTATACAATTTTCTTTTCCAACCCTTCCCTTCTCTATAC		II			rs16944911	0.049854	NA	NA	NA	NA	chr17:47022062-47022344	N_Shelf	CCTGCTTAACGGCTTCCTCCACTTCTTCCCCAATCACAATCACTGGGTAAACTCGGAGCA[CG]TACAGAGAAGGGAAGGGCTGGAAAAGAAAACTGCACAGGAGCTGCACCCCCCATCACTCA	GGTGCAGCTCCTGTGCAGTTTTCTTTTCCAGCCCTTCCCTTCTCTGTACG			SNF8	NM_007241	Body								0.859581	0.841127	0.0184543	168	461	629
cg25116370	0.232758	-2.60828	3.56468	0.000618832	0.999978	-0.967386	chr14	76127843	-	49789415	13656414	CCTACAACAAAACTTCCCACTCAAAACCCAAAAATAACTATTAACTTCCA	CCTACAACAAAACTTCCCGCTCAAAACCCGAAAATAACTATTAACTTCCG	I	A	Red	rs7143743	0.481643	NA	NA	NA	NA	chr14:76127255-76127914	Island	TCCGGGCTGGCGCCTGCAGCAGGACTTCCCGCTCAGAGCCCGGGAGTAGCTGTTGGCTTC[CG]GGCGCGCCGCGTTGAATCGCGGCTGCGGGGTCGTCCCGTCCTTCCCGGGGGGAGCATCTG	CCTGCAGCAGGACTTCCCGCTCAGAGCCCGGGAGTAGCTGTTGGCTTCCG			TTLL5;C14orf1	NM_015072;NM_007176	5'UTR;TSS1500				14:75197262-75197776	14:76126794-76128541	Promoter_Associated		0.149874	0.130045	0.0198288	213	418	631
cg27054655	0.143767	-0.507022	3.47567	0.000827128	0.999978	-1.1607	chr5	178772969	-	44680485		TAACTACTAAATCCAAAATCTAAACCAAACCRAATACCCAAATAAAAACC		II			NA	NA	NA	NA	NA	NA	chr5:178770724-178772794	S_Shore	GGAGGGGGGACTGACTACTGGGTCCAAGGTCTGAGCCAGGCCGAATGCCCAAATAGAGGC[CG]CAAAGGCCAGAAGATGCTGTTAGGAGGGTACACCCAGGGCGCGACCCCAAAGATCAACTT	CGGCCTCTATTTGGGCATTCGGCCTGGCTCAGACCTTGGACCCAGTAGTC			ADAMTS2;ADAMTS2	NM_021599;NM_014244	TSS1500;TSS1500		RDMR						0.421582	0.398891	0.0226916	296	342	638
cg08978597	0.42855	-3.95734	3.55556	0.000637635	0.999978	-0.987337	chr10	8087295	+	15681408	10689310	CCACATCTCAAACAAACTTCCAACAAAAAATAAAACCTAAACAATATACA	CCGCATCTCAAACGAACTTCCAACGAAAAATAAAACCTAAACGATATACG	I	T	Red	NA	NA	NA	NA	NA	NA		OpenSea	AGAGCTCCGCTCTCTACAGTGAGCAGGAGAAGGCGGAGGGGAGGGGGCTCCCAGGAAGAA[CG]TACATCGCCCAGGTTTTACCTCTCGCTGGAAGCCCGCCTGAGATGCGGTGAGCAGTTCCA	CGTACATCGCCCAGGTTTTACCTCTCGCTGGAAGCCCGCCTGAGATGCGG							DMR		10:8127078-8127474	10:8086371-8087708	Unclassified_Cell_type_specific	TRUE	0.0715139	0.0518066	0.0197073	221	423	644
cg05151824	-0.187012	0.0375542	-3.29432	0.00147273	0.999978	-1.54443	chr10	43047371	+	42660453		AAAATAAAAATACAAAAACCCTCCTAAAAAAACATCRAACCTATTAAACC		II			NA	NA	NA	NA	NA	NA	chr10:43047584-43048472	N_Shore	ACAGGACACAAATCGAGCCTCTGCTCCTCCCATCCGTGCTCTAGATCTCTAATGAGGTCT[CG]GCCCAACAGGTCCGATGTCCTCCTAGGAGGGCCCCTGCACCCTCACCCCTCCTTTCCCTT	CGGCCCAACAGGTCCGATGTCCTCCTAGGAGGGCCCCTGCACCCTCACCC			ZNF37B	NR_026777	Body					10:43047324-43048849	Promoter_Associated		0.494281	0.527811	0.0335291	510	135	645
cg13529437	0.247306	2.37827	3.40373	0.00104222	0.999978	-1.31457	chr6	43607635	-	22656346		TCCTTTTCAATATAATACCCTCTAATAAAACACAATATTTTAACTATAAC		II			NA	NA	NA	NA	NA	NA	chr6:43603495-43603818	S_Shelf	ATAATATATTTTCCTTTTCAGTATAATACCCTCTGATAAAACACAGTGTTTTGGCTGTGG[CG]GTTCATTGAGCTAGAAATTAAGTCCTGTAAGTCTATGTACACATCCCAGCAGGGTTCTTT	CGCCACAGCCAAAACACTGTGTTTTATCAGAGGGTATTATACTGAAAAGG			MAD2L1BP;MAD2L1BP	NM_001003690;NM_014628	Body;Body								0.84541	0.820565	0.0248451	363	286	649
cg06699519	0.270255	-2.42176	3.3699	0.00116071	0.999978	-1.3862	chr11	2398327	+	59707415	63661382	TTCAACCAAAACCTCAAAACCCAAATACACCATACTAAACACAAAAAACA	TTCGACCAAAACCTCAAAACCCAAATACACCGTACTAAACGCGAAAAACG	I	T	Red	NA	NA	NA	NA	NA	NA	chr11:2398223-2399598	Island	CTCAGGCGCGGCCCTGCTGCCACCCCCTTGGGGGCTCGGAGCGCGACAGCAGCTTGGGGA[CG]CCTCCCGCGCCCAGCACGGTGCACCTGGGCCCTGAGGTCCTGGCCGAAACGCGCCAAGTT	CGCCTCCCGCGCCCAGCACGGTGCACCTGGGCCCTGAGGTCCTGGCCGAA			CD81	NM_004356	TSS1500				11:2354879-2356174	11:2398301-2398622	Promoter_Associated		0.169875	0.143179	0.0266955	406	243	649
cg16884658	0.313792	3.826	4.37747	3.60521e-05	0.993103	0.929742	chr2	60687823	-	10770414		ATAAAATTACTACAATTCTTAAAAACTTTCCCACAATACTCACAAATATC		II			NA	NA	NA	NA	NA	NA	chr2:60687822-60688992	Island	TCCTGTGGACAGTGAGATTGCTACAGTTCTTGAAGACTTTCCCACAGTACTCACAAGTGT[CG]CTGCGTCTGCCCTCTTTTGAGCTGGGCCTGCCCGGGCCCGGACCACTAATATGGGGCGTG	TGAGATTGCTACAGTTCTTGAAGACTTTCCCACAGTACTCACAAGTGTCG			BCL11A;BCL11A;BCL11A	NM_022893;NM_138559;NM_018014	Body;Body;Body				2:60541252-60542719				0.937586	0.924137	0.0134483	8	643	651
cg15801361	-0.271173	2.78823	-3.62842	0.000501363	0.999978	-0.82702	chr18	18519052	-	20721467		ATCAAAACRAAATTTCTAAAAATACTACTATCCACTTTTTATATAAATAC		II			NA	NA	NA	NA	NA	NA		OpenSea	TGAATGCAAACATCAGAACGAAATTTCTGAGAATGCTGCTGTCCACTTTTTATATGAATG[CG]CGCTTTCAACGAAATCCTCAAAGCAATCCAAATATCCACTTGCAGATTCCACAAAAAGAG	TCAGAACGAAATTTCTGAGAATGCTGCTGTCCACTTTTTATATGAATGCG						low-CpG:16772927-16773351				18:18518664-18519442	Unclassified		0.864936	0.882797	0.0178606	174	478	652
cg11433319	0.295399	-2.441	3.32811	0.00132461	0.999978	-1.474	chr21	19617873	-	31772331	29647497	AAACACTTACTTACATAACTACAAAACAAACCTCTACTTCATTACAAACA	AAACGCTTACTTACGTAACTACGAAACGAACCTCTACTTCATTACGAACG	I	A	Red	NA	NA	NA	NA	NA	NA	chr21:19617098-19617874	Island	TAAATTTTTGTGAAGCGCTTGCTTACGTAGCTGCGGAGCGAGCCTCTGCTTCATTACGAG[CG]GCATAGCCTTTTTCAGGAGTGATTTCCACTTTCTTTGTGAGAGAGTTGACCACACGGCCG	AAGCGCTTGCTTACGTAGCTGCGGAGCGAGCCTCTGCTTCATTACGAGCG			CHODL	NM_024944	Body				21:18539699-18540177				0.169281	0.140871	0.0284096	453	203	656
cg21953905	-0.226778	1.51285	-3.3188	0.00136395	0.999978	-1.49345	chr22	49565499	+	14659374		AACAAACAACAAATCCTAATAACRCTAAAAATCCTTAATTACAAAACCTC		II			rs58594733	0.020128	NA	NA	NA	NA	chr22:49564050-49564612	S_Shore	TCGTCTGAGGGGTGACCTTACTCACTGCCCATCCATCCTGCACCAGGCTGGCCCCGGCCA[CG]AGGCTTTGCAATCAAGGATTCCCAGCGCCACTAGGACTTGTTGCCTGCCCAGAGTTTCTC	GCAGGCAACAAGTCCTAGTGGCGCTGGGAATCCTTGATTGCAAAGCCTCG													0.727895	0.757186	0.0292908	467	189	656
cg13787932	-0.292344	-2.19366	-3.35173	0.00122947	0.999978	-1.42446	chr5	191793	-	12804436		CACAACCTCTACCCACTCCTATTCAAAACCAACTACCTACTAAAACAAAC		II			NA	NA	NA	NA	NA	NA	chr5:191792-192544	Island	ACAGCGTGGCCCACAACCTCTACCCACTCCTGTTCAAAGCCAGCTACCTGCTGGAGCAGG[CG]GAGGTGACGCGCGCGGTGCTGGGGCGCTGGCCCCTGGAGGAGTTCCGGCTGGGAGCGCTG	CGCCTGCTCCAGCAGGTAGCTGGCTTTGAACAGGAGTGGGTAGAGGTTGT			LRRC14B	NM_001080478	1stExon				5:244280-245722	5:191516-192099	Unclassified		0.172886	0.200112	0.0272261	426	232	658
cg12884762	0.161683	-0.861032	3.39867	0.0010592	0.999978	-1.32532	chr12	50931848	+	74764416		CAAACTTTTCTTTCCTCTATCTCTTTCCCTTAACCCTATAAAAACTCCTC		II			NA	NA	NA	NA	NA	NA		OpenSea	AAGGATGGATTCAAAAGAGTACTTATTTATTTTACTTTACTATTACTTCTTAATAGATAC[CG]AGGAGTCTTCATAGGGCTAAGGGAAAGAGACAGAGGAAAGAAAAGCTTGTGTTGGTGTGG	AAGCTTTTCTTTCCTCTGTCTCTTTCCCTTAGCCCTATGAAGACTCCTCG			DIP2B	NM_173602	Body			TRUE		12:50931841-50932053	Unclassified_Cell_type_specific		0.364736	0.339983	0.0247531	372	289	661
cg27040696	0.189202	2.12028	3.5554	0.000637965	0.999978	-0.987683	chr5	2180252	-	31648451		TCTTATTTCCTTTAAAAACCAAATTCAATTCTCAACACCCAAAAAAAAAC		II			NA	NA	NA	NA	NA	NA	chr5:2180251-2180467	Island	CTCACGATACATCTTGTTTCCTTTGAAGACCAAGTTCAGTTCTCAGCACCCAGGAGGAAG[CG]TGAACATACCGGCCAGCAGACACCTCGGGGGCGAGAGGGTGGCACCCACCTCCCGGAGCG	CGCTTCCTCCTGGGTGCTGAGAACTGAACTTGGTCTTCAAAGGAAACAAG									5:2233030-2233841				0.8187	0.79968	0.01902	222	440	662
cg01430604	0.23211	2.76553	3.589	0.000571221	0.999978	-0.914011	chr12	131496958	+	12797374		TCCTACAAATCATCACCAATTCACAAAATCTAAAACAAACCAAAATCATC		II			NA	NA	NA	NA	NA	NA		OpenSea	CACATAGAGGAATTGCCGGGTCGAGCAGTCGCGTCTGTTGTTACTCACAGGCCTGAGAAT[CG]ATGACCCTGGTTTGCTCCAGACCCTGTGAACTGGTGATGATCTGCAGGAAGTCGCTTCTG	CGATGACCCTGGTTTGCTCCAGACCCTGTGAACTGGTGATGATCTGCAGG			GPR133	NM_198827	Body				12:130062867-130062974				0.876829	0.858431	0.0183984	199	464	663
cg06015422	-0.36248	-0.924872	-3.22084	0.00185028	0.999978	-1.6959	chr8	70907139	+	19769408	40787325	ATATAAACATAAACTAAAACAATAAACCCACAACAAAATAAAAAACTCCA	ATATAAACATAAACTAAAACGATAAACCCGCAACAAAATAAAAAACTCCG	I	A	Red	rs62531356	0.256504	NA	NA	NA	NA		OpenSea	TGCGCACTGGGCGCCTGAATAATGGCTCAGGCGCCGGCCCTGCCTGCGTTGCCCGCAGGC[CG]GAGTCCCCCACCCTGCTGCGGGTTTATCGCTCCAGCTCATGCTCATACTCCTTTGTACCA	GTATGAGCATGAGCTGGAGCGATAAACCCGCAGCAGGGTGGGGGACTCCG							DMR		8:71069470-71069723			TRUE	0.32939	0.383606	0.0542163	642	26	668
cg15407063	-0.241383	2.20089	-3.42518	0.000973114	0.999978	-1.26891	chr19	1482001	-	55765300		RACTATCRAAAATAATAAATCCCATACAAAAACCCTACTACTAATCCAAC		II			NA	NA	NA	NA	NA	NA	chr19:1481849-1484119	Island	AAGCCGGGGGCGGCTGTCGGGGGTGGTGGGTCCCATGCAGGAGCCCTGCTGCTGGTCCAG[CG]TGGAGGATGGGGGACAGGAGGTGCAGTCCCTCGGGGAGCCGCCGCGGCAGGTGTAGCAGG	CGCTGGACCAGCAGCAGGGCTCCTGCATGGGACCCACCACCCCCGACAGC			PCSK4	NM_017573	Body				19:1432823-1433897				0.81074	0.833912	0.0231724	345	325	670
cg14476358	0.144675	-0.663333	3.41647	0.00100065	0.999978	-1.28748	chr9	127237646	-	11716484		CAACCTATCTCTAAATATCTCTACAAATATCTCTACCACTAAAAAACRCC		II			NA	NA	NA	NA	NA	NA	chr9:127240131-127240456	N_Shelf	TTCGTGCCCATCAGCCTGTCTCTGGGTATCTCTGCAAGTGTCTCTGCCACTGGGAGGCGC[CG]GGACCCCAGGCAAGGCCAGGCTGTGGGGGATGGGGTAGGAGGCTCCGGGCTGAGGCACTC	CGGCGCCTCCCAGTGGCAGAGACACTTGCAGAGATACCCAGAGACAGGCT			GPR144	NM_001161808	Body								0.395943	0.372564	0.023379	352	319	671
cg01459030	-0.285473	3.25329	-3.72349	0.000364741	0.999978	-0.614756	chr7	73605490	+	11763373		TTCTAACTAACTACAAAACTTTTAAAAACTATATTATTCAACAAATAATC		II			NA	NA	NA	NA	NA	NA		OpenSea	GGTGCACGCTGTCTTGTGAGTCTGAGATTTTTAAAAACTCAGCTTTGGCTGAACAGGTGA[CG]ACTACCTGTTGAATAATATAGTTCTTAAAAGTCCTGTAGCCAGTCAGAAATGAGCTTATT	TCTGACTGGCTACAGGACTTTTAAGAACTATATTATTCAACAGGTAGTCG			MIR590;EIF4H;EIF4H	NR_030321;NM_022170;NM_031992	TSS200;Body;Body								0.897383	0.913087	0.0157036	119	553	672
cg20050093	0.167573	0.911796	3.38523	0.00110554	0.999978	-1.35381	chr10	120102302	-	50793358		CRTACTAATCTCTAATTAACAAAAAACATACTAACTCTTACTCTCTTAAC		II			NA	NA	NA	NA	NA	NA	chr10:120101564-120101937	S_Shore	GTACCAGGCATCGTGCTAATCTCTGGTTAGCAGAAAACATGCTGACTCTTGCTCTCTTGG[CG]CCTACCGTCTGGTGATGGGGTCCAAGGTGCTTCACTGACTGGACCAAAAGTTTACCGAAC	GTGCTAATCTCTGGTTAGCAGAAAACATGCTGACTCTTGCTCTCTTGGCG			C10orf84;C10orf84	NM_001134672;NM_022063	TSS1500;TSS1500					10:120101262-120102379	Promoter_Associated		0.661293	0.636286	0.0250068	391	281	672
cg10496840	0.159376	-0.165762	3.38244	0.00111537	0.999978	-1.3597	chr5	1049595	-	58727360		TATTAAATACAATCCCACAACRTAAAACCCTTTATATCTAACTTCCTCCC		II			rs60534941	0.199817	NA	NA	NA	NA	chr5:1053544-1053807	N_Shelf	CTGGCATTTCGTGTTAAGTGCAGTCCCACAGCGTGAGACCCTTTGTGTCTAGCTTCCTCC[CG]AGCGTGAGGCTTCCAAGCTTGGCTCCTGGTTCTAGCTGAGAGGCCTGCAGCAGGCACGGC	CGGGAGGAAGCTAGACACAAAGGGTCTCACGCTGTGGGACTGCACTTAAC									5:1102566-1102862				0.480603	0.455401	0.0252024	395	277	672
cg06690686	0.216109	-1.5759	3.30915	0.00140589	0.999978	-1.51358	chr10	23003779	-	18604362	11774505	CAAAAAAAACCATAAATTACAAACAAAAACCTAAAAACCCCAACTAAACA	CGAAAAAAACCGTAAATTACGAACGAAAACCTAAAAACCCCGACTAAACG	I	T	Red	rs57280862	0.120311	NA	NA	NA	NA	chr10:23002155-23003790	Island	GCTCCCTGCCCGCGGAGGAGGCCGTGGGTTGCGAGCGGGAGCCTGGGGACCCCGGCTAGG[CG]TCCCCTGCCGCTCCCCAAGGAGGGAGAGGACAGAGTGGGCAGAGTGAGGAGGTTGGGGAG	CGCCTAGCCGGGGTCCCCAGGCTCCCGCTCGCAACCCACGGCCTCCTCCG			PIP4K2A	NM_005028	TSS1500				10:23042597-23044160				0.263658	0.234398	0.0292597	482	190	672
cg03507824	0.157231	-0.0200126	3.34223	0.00126692	0.999978	-1.44441	chr11	64176993	-	29786499		AAAAACAAAAAACAAACCCCRACCTTTTCTTATAATACTCTTACCCCTCC		II			NA	NA	NA	NA	NA	NA		OpenSea	CAGAGAGAGGAGAGAGCAGAGAGCAGGCCCCGGCCTTTTCTTGTAGTACTCTTGCCCCTC[CG]CCCCTCCGTCCCCCCGCCCCCACCACCTCCGGGTGCAGTCGGACTCCCGAGCTTCGCGCT	AGAGCAGAGAGCAGGCCCCGGCCTTTTCTTGTAGTACTCTTGCCCCTCCG								TRUE	11:63933377-63933633				0.506298	0.479451	0.0268471	437	240	677
cg25823128	0.174518	0.940063	3.38973	0.00108982	0.999978	-1.34428	chr10	135373647	-	69620401		TCTACAACTTTTACACCATTTCCATCAAATCTTCAATTTTCTATAAAAAC		II			NA	NA	NA	NA	NA	NA		OpenSea	CACACGACCTTTCTGCAGCTTTTGCACCATTTCCATCAAGTCTTCAATTTTCTGTGAGGA[CG]TGTCCTGCCCTGTGGAGACAAAACCAAACATTTCAGAATCAAGCAGGGCGAGAGGCCACC	CGTCCTCACAGAAAATTGAAGACTTGATGGAAATGGTGCAAAAGCTGCAG			SYCE1;SYCE1;SYCE1	NM_001143764;NM_130784;NM_001143763	Body;5'UTR;Body								0.665503	0.640812	0.024691	388	292	680
cg06059056	-0.263489	-3.44657	-4.16651	7.78135e-05	0.993103	0.416631	chr3	13008969	-	53786504	33716492	TCCTCTCCAAATTACAATACAAACACCACATAACAACCACAATAAAAACA	TCCTCTCCGAATTACAATACAAACACCACATAACGACCGCAATAAAAACG	I	A	Red	NA	NA	NA	NA	NA	NA	chr3:13008648-13009210	Island	GAAGGGACTGGGTCCTCTCCGAGTTGCAGTGCAGGCACCACATGGCGGCCGCAGTGGGAG[CG]GGCCGGGCCGGGAGCCGGGACCCAGGCCCAGCAGAGGCCGCCGACTCCCGCCAGCGAGCC	TCCTCTCCGAGTTGCAGTGCAGGCACCACATGGCGGCCGCAGTGGGAGCG			IQSEC1;IQSEC1	NM_001134382;NM_014869	Body;TSS200				3:12983735-12984569	3:13008122-13010089	Promoter_Associated		0.0804647	0.09371	0.0132453	26	655	681
cg27218685	0.270639	1.05574	3.24489	0.00171774	0.999978	-1.64659	chr3	194238917	-	25649343		AATCCATCCTAAAAACACACTTTCAACTAAATATAATCRCTCATACCTAC		II			rs6437384	0.464835	NA	NA	NA	NA		OpenSea	TCACTTCTACGAATCCATCCTAAAGACACACTTTCAGCTGGATGTGGTCGCTCATGCCTG[CG]ATCCTAACACTCTGGGAGGCTAAAGTGGAAGAATCTCTTGGGCTCAGGAGCTCAAGACCA	CGCAGGCATGAGCGACCACATCCAGCTGAAAGTGTGTCTTTAGGATGGAT								TRUE					0.687075	0.647862	0.039213	600	81	681
cg19695266	-0.270889	-3.09946	-3.56031	0.00062777	0.999978	-0.976945	chr1	1241672	-	19745378	30766487	AAATAAATTCCAACACCCCCACACAACTAAAAAAAAACAATACAAAACCA	AAATAAATTCCAACACCCCCACACGACTAAAAAAAAACAATACAAAACCG	I	T	Red	NA	NA	NA	NA	NA	NA	chr1:1242400-1245185	N_Shore	AGGCCCAGAGGTGAGTGGGTTCCAGCACCCCCACACGACTGGAAGAGGGCAGTACAGGGC[CG]TCTGCGTGGAGGAGGAGGTCCATTAGGCTTCTGACGGAGGGGCCAGGGAGAAGGTGGGTG	CGGCCCTGTACTGCCCTCTTCCAGTCGTGTGGGGGTGCTGGAACCCACTC			ACAP3	NM_030649	Body					1:1241490-1241777	Unclassified		0.0998645	0.118225	0.0183603	215	467	682
cg09552517	-0.27074	-3.15004	-3.63407	0.000492048	0.999978	-0.814511	chr15	75746259	-	12620340	43669432	TAAATCTCAAACCTCAATAAAACCTTTATATAACTTCTCAACTCTCCCCA	TAAATCTCGAACCTCGATAAAACCTTTATATAACTTCTCGACTCTCCCCG	I	C	Grn	NA	NA	NA	NA	NA	NA	chr15:75743081-75748449	Island	CCCGAAGGCTACTAGGTCTCGAGCCTCGGTGGAACCTTTGTGTGGCTTCTCGGCTCTCCC[CG]CCCCCCTCGCCAAGGGCGCCGAGCCTAGGACTTCCGGGCGGGAGGGCAGTTCGAAGGAGC	TAGGTCTCGAGCCTCGGTGGAACCTTTGTGTGGCTTCTCGGCTCTCCCCG			SIN3A	NM_001145357	5'UTR				15:73532399-73535311	15:75746137-75747103	NonGene_Associated		0.0971522	0.113615	0.0164628	169	515	684
cg06703635	0.196318	2.14118	3.4788	0.0008188	0.999978	-1.15396	chr1	201488410	-	67679385		TCTCACAAATAACAACCCTCAAAAAAAATTAATAATAAATACTTCTTTTC		II			NA	NA	NA	NA	NA	NA		OpenSea	GGTAGATGAAATCTCACAGGTAGCAGCCCTCAGAAAGAATTGATGGTAAATACTTCTTTT[CG]ACCTTTAAAGGTGTCAGAGCCTCAGTTAATTGTTCCTAAATCTAAAGAGAAGCCCCACAT	CTCACAGGTAGCAGCCCTCAGAAAGAATTGATGGTAAATACTTCTTTTCG			RPS10P7	NR_026667	TSS1500								0.821364	0.80061	0.0207538	294	391	685
cg10769201	0.174217	2.59377	3.97717	0.000152438	0.999978	-0.0322842	chr2	98794267	+	30779425		CTATCAAATATAAATTCAAATATACCACAAAACTTCCTAAAAACACATTC		II			NA	NA	NA	NA	NA	NA		OpenSea	TGTGAAGTTGGAGTCAGAAGTTAGTCTCTGACTCTTTCAAAACCCTTGCGAGGATTGGTT[CG]AATGTGTTTTTAGGAAGTTCTGTGGTACACTTGAATTTATACTTGATAGAGGGCTCTTAA	TATCAAGTATAAATTCAAGTGTACCACAGAACTTCCTAAAAACACATTCG			VWA3B	NM_144992	Body			TRUE					0.8621	0.848407	0.0136932	55	632	687
cg27331828	-0.216379	1.96048	-3.39838	0.00106019	0.999978	-1.32595	chr1	196619631	+	38625364		TCRAACTCTAACCTCACAACAACATCTAAAAATAAATATCTACRATTTCC		II			NA	NA	NA	NA	NA	NA		OpenSea	AAACCATTTGCAGATGGCAAAGCTAAAGGAGCACACTGTAACATACGCCCACTTGGGCTT[CG]GAAATCGCAGACACCCACCCCTAGATGCTGCTGTGAGGCCAGAGCCCGAAAGCGCTCACT	CGGAAATCGCAGACACCCACCCCTAGATGCTGCTGTGAGGCCAGAGCCCG			CFH;CFH	NM_001014975;NM_000186	TSS1500;TSS1500								0.785261	0.808727	0.0234659	373	316	689
cg08086949	-0.243466	3.23231	-3.85264	0.000234915	0.999978	-0.321054	chr12	72939884	-	13702309		AAACTACCACRATAACTCAATAAAATTTAAACCTTCAAATCCTACATTCC		II			NA	NA	NA	NA	NA	NA		OpenSea	AGAGACAAGAAAAGCTACCACGGTGGCTCAGTGAAATTTAGACCTTCAAGTCCTGCATTC[CG]ATTCTTCATCCTACACTTTCCTTGTCAATACCCTAACTCTCACATAAAAGATCTAATAAA	CGGAATGCAGGACTTGAAGGTCTAAATTTCACTGAGCCACCGTGGTAGCT			TRHDE	NM_013381	Body			TRUE					0.897337	0.911433	0.0140959	80	613	693
cg17768026	0.201128	1.84423	3.4233	0.00097902	0.999978	-1.27294	chr6	137140006	-	47752427		AAAATCCCACTTTCTAATTCATAAATATTCACTTCTTACCRTATCCTCAC		II			NA	NA	NA	NA	NA	NA	chr6:137143635-137144445	N_Shelf	TTATGTCTGGTGAGGTCCCACTTTCTGGTTCATAGATGTTCACTTCTTGCCGTGTCCTCA[CG]TGGTGGAAGGGGTAAGAGGGCTCTCTCTCCAGCCTCTTTTATAAAGGTAATCATCTCATT	AGGTCCCACTTTCTGGTTCATAGATGTTCACTTCTTGCCGTGTCCTCACG													0.788825	0.766356	0.0224694	347	346	693
cg26123763	0.160244	0.0817709	3.3153	0.00137902	0.999978	-1.50076	chr3	150516043	+	30605503		AAATACAACTCRCCCAAAACAAACAATCTCCTACTTACTTTCAAACTACC		II			NA	NA	NA	NA	NA	NA		OpenSea	ATTAGGACCTCAGGTTGCACAATCTCTGTGAACATGGAGAACTTTTTGAGAATGTTGAGG[CG]GCAGCCTGAAAGCAAGCAGGAGATTGTTTGCTTTGGGCGAGCTGCACCTCAGGCTTCCCT	CGGCAGCCTGAAAGCAAGCAGGAGATTGTTTGCTTTGGGCGAGCTGCACC								TRUE					0.524299	0.496322	0.0279776	472	221	693
cg17971837	0.192294	1.39297	3.31434	0.00138318	0.999978	-1.50275	chr22	37215996	-	64745332		ACCAAATAAACATAACTACTCTCRCACAAATAAAAAAACAACATAAAAAC		II			NA	NA	NA	NA	NA	NA	chr22:37212769-37213467	S_Shelf	ACTACAGCCTTGCCAGGTAGACATAGCTGCTCTCGCACAGATGAGGAAACAGCATAAAGA[CG]TTAGATGTTAAGTGACCTGCTGCTCAAAGCCACGGGCCTGGGGTTGGGAGCGGACTCAGC	CGTCTTTATGCTGTTTCCTCATCTGTGCGAGAGCAGCTATGTCTACCTGG			PVALB	NM_002854	TSS1500					22:37215851-37216138	Unclassified_Cell_type_specific		0.733046	0.704936	0.0281103	475	218	693
cg01352688	0.21516	2.43006	3.5244	0.000706057	0.999978	-1.05527	chr4	6072234	-	62630452		AAAATTTCCAAAAACRAAATAAAATACCTTCRTCACAAAAAACAACCTCC		II			NA	NA	NA	NA	NA	NA		OpenSea	GGCTGAAGGGAGAGGTTTCCAGGGGCGGGATAGGGTGCCTTCGTCACAGAGGACAGCCTC[CG]AACCAGTTTATTCTCTGGGGACCTTCCTCCCAGATCCCGTCCTCCCTGAGCCGAGAGCCT	CGGAGGCTGTCCTCTGTGACGAAGGCACCCTATCCCGCCCCTGGAAACCT			JAKMIP1;JAKMIP1	NM_144720;NM_001099433	Body;Body				4:6123064-6123136				0.848784	0.829854	0.0189305	251	444	695
cg10271058	0.244028	2.174	3.34919	0.00123938	0.999978	-1.4298	chr11	134147837	+	41687460		CCCAAAATCRAAAACTCAAATTCCCRACCAAAATACACTTATAAAATAAC		II			rs140570171	0.011	NA	NA	NA	NA	chr11:134145559-134147180	S_Shore	GAAGGCCTGTGGCTTCAATACTGTCACCACGTGAGTGCCGGCCCCTCACCTCCAGGATCT[CG]TTACCCTACAAGTGCATCCTGGCCGGGAACCTGAGCCTCCGATTTTGGGGGCCCAGCGTG	CCAAAATCGGAGGCTCAGGTTCCCGGCCAGGATGCACTTGTAGGGTAACG			GLB1L3	NM_001080407	Body				11:133652720-133653073				0.825515	0.800101	0.0254135	428	269	697
cg05801246	0.317197	-0.642423	3.20689	0.00193147	0.999978	-1.72437	chr10	125651549	+	34772419		AATAAAACAACRAACCTCAATATTTTCTTCTAAAATTAAAACTCATTAAC		II			NA	NA	NA	NA	NA	NA	chr10:125650820-125651373	S_Shore	AAGAAAGCCCCCTTCCCCTCCCCCGCAGGCCAGCCAGCGTGGGGCCTGCTTCCCCAGAGA[CG]CTAATGAGTTTCAATCTTAGAAGAAAACACTGAGGCCCGCTGTTCCATTCCTGTTTTACA	CGCTAATGAGTTTCAATCTTAGAAGAAAACACTGAGGCCCGCTGTTCCAT			CPXM2	NM_198148	TSS200								0.411555	0.360195	0.0513605	669	28	697
cg10017561	0.325214	-3.31076	3.58957	0.000570157	0.999978	-0.912769	chr20	57465858	-	52660496	40655431	ACCACCACCACCAAACACCACCATCACTATATAATATAAATTTTTATTCA	GCCACCGCCACCAAACACCACCATCGCTATATAATATAAATTTTTATTCG	I	T	Red	NA	NA	NA	NA	NA	NA	chr20:57463652-57467739	Island	ACCCCCCACCCCGCCACCGCCACCAGACACCACCATCGCTGTGTAGTGTGGGTTTTTATT[CG]TGTTCGTGTGTGTGTGTGGACACATTTTCCTTTTCGGTTGCTCTGTCCTTTGGTTCGTGC	GCCACCGCCACCAGACACCACCATCGCTGTGTAGTGTGGGTTTTTATTCG			GNAS;GNAS;GNAS;GNAS;GNAS;GNAS;GNAS;GNAS	NM_001077490;NM_000516;NM_001077488;NR_003259;NM_001077489;NM_016592;NM_080426;NM_080425	3'UTR;TSS1500;TSS1500;Body;TSS1500;3'UTR;TSS1500;Body	high-CpG:56898700-56901058			20:56898137-56901134				0.100452	0.0833709	0.0170814	198	500	698
cg09524907	-0.1842	-2.55795	-3.60076	0.000549478	0.999978	-0.888135	chr8	56014406	+	22652356		RAATCCCAAAAACCRAAAAAAACRACCAAAAAAACCTAAAAATAACAATC		II			NA	NA	NA	NA	NA	NA	chr8:56013656-56015761	Island	CCCTCCCCCAGTGTCGCTCAAATCCACCCAGCGTTCCGAAATCCCGGGAGTGGGGGCCTT[CG]ACTGTCACCCTCAGGCCCCCTTGGCCGCTCCTCCCGGCCCTTGGGACCCGCCAGGGCAGT	CGACTGTCACCCTCAGGCCCCCTTGGCCGCTCCTCCCGGCCCTTGGGACC			XKR4	NM_052898	TSS1500				8:56176211-56178290			TRUE	0.140135	0.15694	0.0168051	191	508	699
cg17011709	-0.367451	-2.24248	-3.24333	0.00172606	0.999978	-1.64979	chr10	94826053	+	50602380		ACRACAAACRACAAACRACAAAAAACAAAAAACTAACCATAAACTAACAC		II			rs61863115	0.113449	NA	NA	NA	NA	chr10:94825546-94826320	Island	CGCCAGTGTCCGGGGGCTACCGCACCGCCCTGCGCACCTTCGAGCTCGACGTAAGTGCGC[CG]TGCCAGCCCATGGCCAGCCTCCTGCCTCCTGCCGCCTGCCGCCTGCCGCCTGCCGCCTGC	CGGCAGGCGGCAGGCGGCAGGAGGCAGGAGGCTGGCCATGGGCTGGCACG			CYP26C1	NM_183374	Body		DMR		10:94815537-94816305			TRUE	0.166544	0.203928	0.0373843	603	96	699
cg00066508	0.209796	2.97704	3.82473	0.000258543	0.999978	-0.385042	chr12	110355602	-	67613415		TCCTCTAAAATTTAATTTTCATCACATTATATTCAAAATTCCATATCTCC		II			NA	NA	NA	NA	NA	NA		OpenSea	TACTATACCCTTCCTCTGAGGTTTAGTTTTCATCACATTATGTTCAAGATTCCATATCTC[CG]TAAATTACAGCTAATTACAGGGCATTGTTCCATGGTTATTAAAAATCAGAGTTTATTAAA	CGGAGATATGGAATCTTGAACATAATGTGATGAAAACTAAACCTCAGAGG			TCHP;TCHP	NM_001143852;NM_032300	3'UTR;3'UTR								0.891307	0.877293	0.0140143	86	616	702
cg24058732	0.1617	-0.183403	3.31894	0.00136333	0.999978	-1.49315	chr2	177004998	+	47714380		ACCCTCRAATATACTATACTAACATAACAAAATCCRAAAATAATCAAACC		II			NA	NA	NA	NA	NA	NA	chr2:177005364-177005666	N_Shore	TTGGGAAAAGGCCTTTTCTCCTGGCGCCTGTTCAAACCGCCACACTTCAGGCCAATCCTT[CG]GCCTGACCATTCCCGGATCTTGTTATGCCAGCACAGCACATTCGAGGGCTCTGGGGGGCA	CGGCCTGACCATTCCCGGATCTTGTTATGCCAGCACAGCACATTCGAGGG									2:176713208-176713313	2:177004978-177005733	Unclassified		0.478214	0.451253	0.0269613	466	236	702
cg20011075	0.280048	3.22314	3.55087	0.000647522	0.999978	-0.997594	chr1	4008090	+	15677364	74772465	CACTTTATAAAAAAAATACCATTTAAAAAAAACTCACATTATCAAAAACA	CGCTTTATAAAAAAAATACCATTTAAAAAAAACTCGCATTATCGAAAACG	I	C	Grn	NA	NA	NA	NA	NA	NA		OpenSea	CACATTCCCTCCACCCGGCATCGTCATCATCGTGTTGATCTCCTTCTGGAGCGTCCACAG[CG]CTCCCGACAATGCGAGTCTTCCCCAAATGGCATCTCTTTCATAAAGCGAGACACAGGTCC	CGCTCCCGACAATGCGAGTCTTCCCCAAATGGCATCTCTTTCATAAAGCG									1:3907905-3907965				0.907696	0.889778	0.0179179	229	475	704
cg22514722	0.222466	2.58825	3.46245	0.000863218	0.999978	-1.18914	chr3	127473755	-	41623334		CTAAATATATACACTCATACCCACRTATCCCAAACTCTTTAAAAAAAAAC		II			NA	NA	NA	NA	NA	NA		OpenSea	GAGCTGTATTTCTAGGTGTGTGCACTCATGCCCACGTGTCCCAGGCTCTTTAGAGGGAAG[CG]TTCCCTAGGTACGTGGCATTCCCTTTCAAATTCACCTAGCGCCCCAGAGAAGGGATTGTG	CGCTTCCCTCTAAAGAGCCTGGGACACGTGGGCATGAGTGCACACACCTA			MGLL;MGLL	NM_007283;NM_001003794	Body;Body				3:128956299-128956657	3:127473506-127474444	Unclassified		0.863126	0.84248	0.0206466	309	397	706
cg27239981	0.186887	0.252304	3.28198	0.00153063	0.999978	-1.57003	chr6	166263710	+	51745329	62600419	ACACAAATAATATTAAAAACACATAAAAACTAAAACCTTAACACCTCCCA	ACACGAATAATATTAAAAACACGTAAAAACTAAAACCTTAACGCCTCCCG	I	A	Red	NA	NA	NA	NA	NA	NA	chr6:166267509-166268461	N_Shelf	GAGAGCAGGCTGCTGGGCCAGGCGCTGACAGCTCGCCCCATGGAGCCGCCACCTGGACTC[CG]GGAGGCGCCAAGGCTTCAGCCCCCACGTGCTCTTAACATCATCCGTGCAAATATCATCAC	CGGGAGGCGCCAAGGCTTCAGCCCCCACGTGCTCTTAACATCATCCGTGC									6:166183618-166183746				0.554225	0.524173	0.0300525	525	181	706
cg02133430	-0.18235	2.704	-3.81925	0.000263438	0.999978	-0.397564	chr8	54573841	-	68630320	26659329	ATACCTAACAACTAACTCCAAAAAAAACCTAAAAAACACAAACCACAACA	ATACCTAACAACTAACTCCAAAAAAAACCTAAAAAACGCGAACCACAACG	I	T	Red	NA	NA	NA	NA	NA	NA	chr8:54569667-54570010	S_Shelf	GCTGAGGTCAGGGTGCCTGGCAGCTGACTCCAGGGGAGACCTGAGAGGCGCGGGCCACAG[CG]TGGAAGGAAGCTCTTCAGCCTTGAAGAAAGCGCCGGGGCCAGGTCCGCCAGCCCAAAGTC	CGCTGTGGCCCGCGCCTCTCAGGTCTCCCCTGGAGTCAGCTGCCAGGCAC									8:54736382-54736442				0.861038	0.874885	0.0138471	88	622	710
cg18081258	-0.224678	-2.15991	-3.34033	0.00127454	0.999978	-1.4484	chr14	21494161	-	23688351		TAAAAAAAACRCAATATCCTAAACTAAAACCCAAAAAACCCTATAACTTC		II			NA	NA	NA	NA	NA	NA	chr14:21492735-21494270	Island	GAGTAGGGGCTTGGGGAGGACGCAGTGTCCTGGGCTGGGACCCAAGAGACCCTGTGGCTT[CG]CCGCTAACCCCTCCCAGTCCGGCCCAGAATAGGAGACCAGCTCAGGCCCGCTGAATCGCA	GGGGAGGACGCAGTGTCCTGGGCTGGGACCCAAGAGACCCTGTGGCTTCG		TRUE	NDRG2;NDRG2;NDRG2;NDRG2;NDRG2;NDRG2;NDRG2;NDRG2	NM_201539;NM_201535;NM_201538;NM_201541;NM_201540;NM_201536;NM_016250;NM_201537	TSS1500;TSS1500;TSS1500;TSS1500;TSS1500;TSS1500;TSS1500;TSS1500				14:20562576-20564110			TRUE	0.175679	0.200965	0.0252866	439	273	712
cg02501116	-0.263887	2.60495	-3.35302	0.00122445	0.999978	-1.42174	chr8	68107083	+	71716403		AATTAACATAAAATTACTTCCATTCTTAAAACACCTAATCTAACAAAACC		II			NA	NA	NA	NA	NA	NA		OpenSea	TACAATCAATCAGATTCAATTAAAGAATGAAGCAAGAGCTACCTCTTCATTGACTGGACA[CG]GCCTTGTTAGATTAGGTGTTTTAAGAATGGAAGTAATCTCATGCCAACTAGTGTTTTCCC	CGGCCTTGTTAGATTAGGTGTTTTAAGAATGGAAGTAATCTCATGCCAAC			CSPP1;CSPP1	NM_001077204;NM_024790	Body;Body			TRUE					0.847129	0.871854	0.0247258	424	291	715
cg26804733	-0.264718	2.57857	-3.40336	0.00104346	0.999978	-1.31536	chr6	31617517	+	44608306		TACTTTAATTTAAAAATTTACACAATAATAATCTCACRATCAAAACAAAC		II			NA	NA	NA	NA	NA	NA	chr6:31619856-31620525	N_Shelf	ACAAAGACAGACAACCGAGTTGTGGAGGTGAGGGGTAAAAACCACCACAGAATCACTACC[CG]TTTGTCTTGACCGTGAGATCATTACTGTGCAAACCCTTAAACTAAAGTAACAGCTGTCAA	ACTTTAGTTTAAGGGTTTGCACAGTAATGATCTCACGGTCAAGACAAACG			BAT3;BAT3;BAT3;BAT3	NM_004639;NM_080702;NM_080703;NM_001098534	Body;Body;Body;Body								0.846	0.868251	0.0222503	364	352	716
cg06185146	0.238785	-0.270887	3.22116	0.00184841	0.999978	-1.69522	chr3	63428305	+	26788502		ACRTCTCCTACAAAACCTCAAAATTAAAATAATTTCAAAAACTTAAATAC		II			NA	NA	NA	NA	NA	NA		OpenSea	AGTAGTCGAGCTGAACTCCTTCCTACAGAGGTTTATTTGAAGAAGAAAGCAGATCCATGT[CG]CACTTAAGCCTCTGAAACCATTTTAATTTTGAGGTTTTGCAGGAGACGTCTTTAAGTAAC	CGCACTTAAGCCTCTGAAACCATTTTAATTTTGAGGTTTTGCAGGAGACG			SYNPR;SYNPR	NM_001130003;NM_144642	Body;TSS1500								0.46805	0.428816	0.0392342	638	78	716
cg17283838	0.185142	-1.71576	3.41106	0.00101811	0.999978	-1.299	chr1	93427260	-	34738509	42730499	CTATCAAAAAAACTACTACCAACTCCACCATAAAAAAAAATCACACCTCA	CTATCAAAAAAACTACTACCGACTCCGCCATAAAAAAAAATCGCACCTCG	I	C	Grn	rs6681240	0.482639	NA	NA	NA	NA	chr1:93426512-93427754	Island	CGGCCGCCGCGGCTGTCAGAGAGGCTGCTGCCGACTCCGCCATAAAGGGGAGTCGCACCT[CG]CCTCCGCCGACACAAATCGACTGCGCCTGGAGCTTAAAGGGGAGGCGCGCGGAGGCGGGA	CTGTCAGAGAGGCTGCTGCCGACTCCGCCATAAAGGGGAGTCGCACCTCG			FAM69A	NM_001006605	TSS200				1:93198599-93200333	1:93426914-93427700	Promoter_Associated		0.242656	0.220658	0.0219976	356	362	718
cg12123879	0.306762	0.469125	3.19821	0.00198367	0.999978	-1.74205	chr19	55417361	-	64640419		AACAATTATCAAAATTACTAACTAAACCACAAATATATCAAAAAAACCAC		II			NA	NA	NA	NA	NA	NA		OpenSea	TGGGCTGAGCAGACAATTGTCAGAGTTGCTGGCTAGACCACAGATGTGTCAGAGGGACCA[CG]GCCTTTCTGTAAGCTCATGGTCAGAGGCGGAGGGGAGTTGTGAACGTTCTGATGAAAGCA	ACAATTGTCAGAGTTGCTGGCTAGACCACAGATGTGTCAGAGGGACCACG			NCR1;NCR1;NCR1;NCR1;NCR1	NR_027043;NM_001145457;NM_001145458;NR_027041;NM_004829	TSS200;TSS200;TSS200;TSS200;TSS200			TRUE					0.597386	0.54707	0.0503166	692	29	721
cg10932486	0.244487	0.154136	3.21092	0.00190765	0.999978	-1.71615	chr5	61028265	+	16703415	23702347	TTAAAAAAAACACCCAAACCAACTAATAATACATAATACTCTCCACAACA	TTAAAAAAAACGCCCGAACCGACTAATAATACATAATACTCTCCACAACG	I	C	Grn	rs141165539	0.0234	NA	NA	NA	NA		OpenSea	TAGCCCCATTATTTACTCAGACAACGGTGCAGGCAGCCTGGGCTCCCTGCTTGCGCGGGG[CG]CTGTGGAGAGCACCATGCATCACCAGCCGGCCCGGGCGCTTCCCTTAAATAGTAATATGT	TTAAGGGAAGCGCCCGGGCCGGCTGGTGATGCATGGTGCTCTCCACAGCG									5:61063986-61064132				0.541012	0.500387	0.040625	659	63	722
cg12995777	-0.248951	3.49233	-3.93423	0.000177107	0.999978	-0.132443	chr6	31667842	+	10801498		CCATACAAAAAAACACTATATAACAATACAAATAAACAAACTATAACTAC		II			NA	NA	NA	NA	NA	NA	chr6:31670594-31671274	N_Shelf	ACCAAACTGCTAGGATTACAGGCATGAGCCACTGCACCTGGCTTCATCTGCGTTGTTGAG[CG]TAGCTACAGTTTGTTCATTTGCATTGCTATATAGTGTTCTCTTGCATGGCTATTGCATGG	CATGCAAGAGAACACTATATAGCAATGCAAATGAACAAACTGTAGCTACG			BAT5	NM_021160	Body								0.912412	0.925502	0.0130901	63	660	723
cg20087303	-0.356151	-3.38013	-3.47993	0.000815795	0.999978	-1.15151	chr14	70233840	-	23700352	54609398	AAAAACATCCCCAAAAATAACATAAAACACACCCTCCATTTTATAAAACA	AAAAACGTCCCCGAAAATAACGTAAAACGCGCCCTCCATTTTATAAAACG	I	C	Grn	NA	NA	NA	NA	NA	NA	chr14:70233570-70234668	Island	GACCCAAGGCCCAGGGGCGTCCCCGGAAGTGACGTAGGACGCGCCCTCCATTTTGTGGAG[CG]CCAGAGCTGCTAAGTGCGTCAGTTGTGGAGTGGCGTAGACGAGTTAAGTCCTGGTCTGCG	AGGGGCGTCCCCGGAAGTGACGTAGGACGCGCCCTCCATTTTGTGGAGCG			SFRS5;LOC100289511;SFRS5;SFRS5;SFRS5	NM_006925;NR_029378;NM_001039465;NM_006925;NM_001039465	1stExon;Body;1stExon;5'UTR;5'UTR	high-CpG:69303556-69303634			14:69303348-69304421	14:70233544-70233969	Unclassified		0.0838444	0.103185	0.0193407	292	431	723
cg12327405	0.170889	-0.223931	3.27282	0.00157496	0.999978	-1.58899	chr18	11751343	+	60808495		CCAAACAACACAACAACTCTTCCAAAAAACACTATAACCTCRAACTTAAC		II			NA	NA	NA	NA	NA	NA	chr18:11750953-11752756	Island	GGGTCTCAGTAACGGAGGGCAGGTGCCAGTCTCGCGCCCTAGTTCGTTCCTCTGCTACAA[CG]CCAAGTTCGAGGCCACAGTGCCTTCTGGAAGAGTTGTTGTGCTGCTTGGGAGCACTGCAC	CGCCAAGTTCGAGGCCACAGTGCCTTCTGGAAGAGTTGTTGTGCTGCTTG			GNAL;GNAL;GNAL	NM_001142339;NM_002071;NM_182978	TSS1500;TSS1500;Body				18:11740857-11742150			TRUE	0.472259	0.442616	0.0296425	540	184	724
cg24312771	-0.250749	-3.43802	-3.80615	0.000275513	0.999978	-0.427486	chr1	154378020	+	59646437	70627426	AACAAACAAACTAATAAAAACCAAACAACAAAAATAACAAAAACAAAACA	AACGAACAAACTAATAAAAACCGAACGACAAAAATAACAAAAACGAAACG	I	A	Red	NA	NA	NA	NA	NA	NA	chr1:154377670-154378445	Island	CGGGCTCCTGCGGATGGGGGCTGCCCCCGGGGCCTGAGCCCGCCTGCCCGCCCACCGCCC[CG]CCCCGCCCCTGCCACCCCTGCCGCCCGGTTCCCATTAGCCTGTCCGCCTCTGCGGGACCA	CGCCCCGCCCCTGCCACCCCTGCCGCCCGGTTCCCATTAGCCTGTCCGCC			IL6R;IL6R;IL6R;IL6R	NM_000565;NM_000565;NM_181359;NM_181359	5'UTR;1stExon;1stExon;5'UTR	high-CpG:152644431-152644722			1:152644148-152645296	1:154377029-154379091	Promoter_Associated		0.0808771	0.0944309	0.0135538	89	638	727
cg07496624	0.220854	3.20861	3.70769	0.00038468	0.999978	-0.650276	chr2	183123847	-	13709349		CTCTACTCAATAATTTCAAAAATCTTAACCTCTAATATACCCTAAATAAC		II			NA	NA	NA	NA	NA	NA		OpenSea	TTGGAAAGTCCCTCTACTCAGTAATTTCAAGGATCTTAGCCTCTAATGTACCCTAAATGA[CG]CTCAATTTCTTTCTACCAGACTAACTTCTCAAAGTACTGATTGACATCAATGCAGTATCT	TCTACTCAGTAATTTCAAGGATCTTAGCCTCTAATGTACCCTAAATGACG			PDE1A;PDE1A	NM_005019;NM_001003683	Body;Body			TRUE					0.906485	0.891927	0.0145585	130	597	727
cg17770910	0.328237	-2.21132	3.29856	0.00145335	0.999978	-1.53563	chr8	143851427	-	69617322	48668377	AAAAACCAACCTAACCCCAAAACTCACTAATTAAACCTCTAAACAAACCA	AAAAACCAACCTAACCCCAAAACTCGCTAATTAAACCTCTAAACGAACCG	I	A	Red	rs2289071	0.425169	NA	NA	NA	NA		OpenSea	GGTCCGGGCGGTAGGGGCCAACCTGGCCCCAAAGCTCGCTGGTTAGGCCTCTGAGCGGGC[CG]GTGTCATCTCATGAGCCATCTCTCCTTGTCCATAAAGTAGGGATAGCCCTGGCTGACAGG	CGGCCCGCTCAGAGGCCTAACCAGCGAGCTTTGGGGCCAGGTTGGCCCCT			LYNX1;LYNX1	NM_177458;NM_023946	TSS200;Body								0.191989	0.1645	0.0274897	499	229	728
cg14480449	-0.228452	-0.208047	-3.20184	0.00196166	0.999978	-1.73465	chr14	105933035	+	65680503		CCTTACCCCTACTAAACATCAAAAAACRCTTCTTCATATTACCTAACAAC		II			NA	NA	NA	NA	NA	NA	chr14:105932793-105933036	Island	CCCGCCCGGGCACCCGCCGTGCGTGCTGACGCTGTCTTCTCTCCCTCTCTCCCACCCCGG[CG]CTGCCAGGCAACATGAAGAAGCGCCTCTTGATGCCCAGTAGGGGTAAGGCCTGGAGCCGC	CTTACCCCTACTGGGCATCAAGAGGCGCTTCTTCATGTTGCCTGGCAGCG			MTA1	NM_004689	Body				14:105003839-105004515				0.448606	0.491826	0.0432201	681	49	730
cg08548478	-0.310619	-3.7242	-3.68885	0.00040981	0.999978	-0.692502	chr7	91570500	-	13777387	26728336	CAAAACCAAAATAAAAAAACCCAAAACAACCAAACCTACAATAAAAAACA	CAAAACCAAAATAAAAAAACCCGAAACAACCGAACCTACGATAAAAAACG	I	A	Red	NA	NA	NA	NA	NA	NA	chr7:91569986-91570348	S_Shore	GCTGGAGGCCGGCAAAGCCAAGGTAGGAGAGCCCGAGGCAACCGGGCCTGCGGTGGGAGG[CG]GTGGCTAGCACGGGGTGGGAGGGGGCCTGGGAAGCGGAGTTCGCCGCAGCCCCAGTGCAC	CGCCTCCCACCGCAGGCCCGGTTGCCTCGGGCTCTCCTACCTTGGCTTTG			AKAP9;AKAP9	NM_005751;NM_147185	Body;Body				7:91407859-91408503	7:91569072-91571055	Promoter_Associated	TRUE	0.067001	0.0816644	0.0146635	140	591	731
cg03975447	-0.233385	-0.916308	-3.20958	0.00191555	0.999978	-1.71889	chr5	178741374	-	51734392	69667329	CCACATCTCACTAAAAACTAAACAACCACCAACTCTAAACTAAATAAACA	CCACGTCTCACTAAAAACTAAACGACCGCCAACTCTAAACTAAATAAACG	I	C	Grn	rs114501319	0.011729	NA	NA	NA	NA		OpenSea	GCCTCCTGGCTGCCACGTCTCACTGGGAGCTGGGCGGCCGCCAGCTCTGAGCTAAGTGAG[CG]CAGAGGAGAGTGCAGGGAGCGGCAAGGCCAGGCTCCTCCCCACCCCGTGGCGTGGCGTGG	CCACGTCTCACTGGGAGCTGGGCGGCCGCCAGCTCTGAGCTAAGTGAGCG			ADAMTS2;ADAMTS2	NM_021599;NM_014244	Body;Body			TRUE	5:178673748-178674049			TRUE	0.333447	0.373556	0.0401092	662	69	731
cg22253541	-0.253502	2.55891	-3.43955	0.000929276	0.999978	-1.23823	chr12	65385603	+	73767476		CCTACTATACCAAAACTAATACTCTTTTTATTATATTATCTTACCTTTCC		II			NA	NA	NA	NA	NA	NA		OpenSea	GAGAGTGTTTTAATGTGGAGGAATGACCCTAATGATAGAAGTTTTAATAAGTCAAATGAG[CG]GAAAGGCAAGACAATATAACAAAAAGAGCACCAGTTTTGGCATAGCAGGCACTCAATAAA	CTGCTATGCCAAAACTGGTGCTCTTTTTGTTATATTGTCTTGCCTTTCCG								TRUE					0.845257	0.865676	0.020419	332	400	732
cg03450593	0.262502	1.40921	3.23361	0.00177874	0.999978	-1.66974	chr15	55968870	-	62779365		AAAAACTACATAATACRATTTCTAACCTACCAAACAAAATCCTTAAATTC		II			NA	NA	NA	NA	NA	NA		OpenSea	GCTTGTTAATTAGGAGCTGCATAGTACGATTTCTGACCTACCAAACAAGGTCCTTGAGTT[CG]AATTAAAAAGCCTTGTTCCATTCCTGAATAGACCACTGAGCCTCATGTGGAGGCTCTAAT	CGAACTCAAGGACCTTGTTTGGTAGGTCAGAAATCGTACTATGCAGCTCC			PRTG	NM_173814	Body								0.736612	0.701194	0.0354176	618	114	732
cg18807895	-0.266849	2.71547	-3.4031	0.00104434	0.999978	-1.31592	chr5	110427112	+	17721312		CAACATATAAAATAACCTCTTCTCTTACTATTTTATTTCCATTTCATTTC		II			NA	NA	NA	NA	NA	NA	chr5:110427777-110428270	N_Shore	GTATAGTTACGTTAGTCACTCGACCCAAACCTTAATAGGCTGCCAAAACGTTTTCATAAA[CG]AAATGAAATGGAAATAAAACAGTAAGAGAAGAGGTTATTCCATATGTTGAACTTTGGTCC	CGAAATGAAATGGAAATAAAACAGTAAGAGAAGAGGTTATTCCATATGTT			WDR36	NM_139281	TSS1500		CDMR						0.857429	0.879272	0.0218434	366	368	734
cg18780432	0.2821	3.29176	3.70395	0.000389544	0.999978	-0.658661	chr17	65040769	+	25748450		AAAAAAAAATCACRCRAACCTTCAACATTTTAATCTAAAACATAATAATC		II			NA	NA	NA	NA	NA	NA	chr17:65040729-65041029	Island	CTTGTCACCTGCCCTAGGAGACGCAGCCGCCGGACCCTGCCCAGGGCACCCACGCCTCGG[CG]ACCACCATGTCCCAGACCAAAATGCTGAAGGTCCGCGTGACCCTCTTCTGCATCCTGGCA	GAAGAGGGTCACGCGGACCTTCAGCATTTTGGTCTGGGACATGGTGGTCG			CACNG1;CACNG1	NM_000727;NM_000727	1stExon;5'UTR				17:62470997-62471473				0.910539	0.896211	0.0143279	134	601	735
cg14597492	0.322066	-2.94951	3.39367	0.00107623	0.999978	-1.33594	chr8	125487571	-	15680379	34784300	AACTCTTTAATAAAAAAACAAAATACCATACATCCCAAAACAACTATACA	GACTCTTTAATAAAAAAACAAAATACCGTACGTCCCGAAACGACTATACG	I	A	Red	NA	NA	NA	NA	NA	NA	chr8:125486521-125487622	Island	AGATCTTCCTCCGGCTCTTTGGTAAGGGAACAGGGTACCGTACGTCCCGGGACGGCTATG[CG]GGCCGAGACGTTCCCCGGGGAGCGGGCAGGCGCGCAGAGGCCATGGGTCGAGTATGTGTC	GGCTCTTTGGTAAGGGAACAGGGTACCGTACGTCCCGGGACGGCTATGCG			RNF139	NM_007218	Body				8:125555917-125557178	8:125486424-125488912	Promoter_Associated		0.126002	0.103798	0.0222036	382	355	737
cg11630226	-0.40021	-0.824274	-3.18433	0.00206987	0.999978	-1.77025	chr8	143781816	-	23684503	42612416	TAAAATAAAACTCCAAAAACCCCAACAAACCCCAACAAATAAAAAACACA	TAAAATAAAACTCCAAAAACCCCGACAAACCCCGACGAATAAAAAACGCG	I	C	Grn	NA	NA	NA	NA	NA	NA	chr8:143781581-143782609	Island	GCCGCGAGGCCCTGAGATGAGGCTCCAAAGACCCCGACAGGCCCCGGCGGGTGGGAGGCG[CG]CGCCCCGGGGCGGGCGGGGCTCCCCCTACCGGCCAGACCCGGGGAGAGGCGCGCGGAGGC	TGAGATGAGGCTCCAAAGACCCCGACAGGCCCCGGCGGGTGGGAGGCGCG			LY6K;LY6K;LY6K;LY6K;LY6K;LY6K	NM_001160355;NM_001160354;NM_001160354;NM_017527;NM_017527;NM_001160355	1stExon;1stExon;5'UTR;1stExon;5'UTR;5'UTR				8:143778550-143779976	8:143781752-143781891	Unclassified_Cell_type_specific	TRUE	0.339037	0.412079	0.0730417	728	9	737
cg05873732	-0.253646	-2.93709	-3.52337	0.000708435	0.999978	-1.05751	chr22	26986246	+	29627301	50713486	TAAACCAACAAACAAACAAAAACTTCCAAAACAACAAAACAAAATTCCCA	TAAACCAACGAACAAACAAAAACTTCCAAAACGACGAAACGAAATTCCCG	I	A	Red	NA	NA	NA	NA	NA	NA	chr22:26985516-26986264	Island	TGCGCCTCGGGACCGCGAGGTGAGCAGAGGCTGGTCGGGAAGTTTCCCGGAGGCTCGCCC[CG]GGAACCCCGCCCCGCCGCCCTGGAAGCCCCTGTCTGCTCGCTGGCTTACCCCTAGGACGG	TAAGCCAGCGAGCAGACAGGGGCTTCCAGGGCGGCGGGGCGGGGTTCCCG			TPST2	NM_003595	TSS200				22:25315517-25316287	22:26985206-26986706	Promoter_Associated		0.111044	0.128451	0.0174071	254	488	742
cg05082311	0.152394	0.509141	3.33857	0.00128163	0.999978	-1.45208	chr17	8313457	+	62629484		CTACTAAATACAAAACATTACRACTTCAACAAAACAACCTTCTCACRAAC		II			NA	NA	NA	NA	NA	NA		OpenSea	TGGTTTTACCCTGAGTCAGAACACTAAGAGCCTGGTTTATTTACTGACCACTTGCTTTGA[CG]CTCGTGAGAAGGCTGTTCTGTTGAAGTCGTAATGCTTTGCACCCAGTAGGAGCTCAACAA	CGCTCGTGAGAAGGCTGTTCTGTTGAAGTCGTAATGCTTTGCACCCAGTA							DMR			17:8313341-8315005	Unclassified		0.595735	0.571564	0.0241708	442	300	742
cg18328894	0.330504	-4.11379	5.09035	2.32965e-06	0.954223	2.74719	chr5	175224563	+	66640422	41782406	AAAAATATTCCAAAAACAACCAAAATCAATAATTACAACTACCAACCACA	AAAAATATTCCGAAAACAACCGAAATCAATAATTACAACTACCAACCGCG	I	A	Red	NA	NA	NA	NA	NA	NA	chr5:175223609-175224679	Island	CAGACCCCCACCCCATCCCAGCTCAGAATCGCGGACTTCCAAGAGCCCTGCACAGAAGCC[CG]CGGCTGGCAGCTGCAATCACTGACTCCGGCTGTCCCCGGAACATCCCTAGAAAGTGTGAG	CGCGGCTGGCAGCTGCAATCACTGACTCCGGCTGTCCCCGGAACATCCCT			CPLX2	NM_006650	5'UTR		DMR	TRUE	5:175156227-175157512			TRUE	0.0598092	0.0484003	0.0114089	1	743	744
cg23121350	0.169906	-2.87568	3.87878	0.000214671	0.999978	-0.260882	chr17	38219361	+	73739321		CRCRACTTTACATAATCAATCRCAAAACATTTACATATTAATACCCCCTC		II			NA	NA	NA	NA	NA	NA	chr17:38219084-38219880	Island	GACCCCCGCGTCGCTGCCCAGCCCGGTCCGGCGCGCCACGCCGAGGTAAGGAGGAGGGAG[CG]AGGGGGCATTAATATGCAAATGCCTTGCGATTGATTATGCAAAGCCGCGGGGCTCCGTGG	GCGGCTTTGCATAATCAATCGCAAGGCATTTGCATATTAATGCCCCCTCG			THRA;THRA	NM_003250;NM_199334	5'UTR;5'UTR				17:35472462-35473370	17:38218302-38219385	Promoter_Associated	TRUE	0.12534	0.112367	0.0129727	75	671	746
cg27497839	0.330458	-2.67592	3.28196	0.0015307	0.999978	-1.57007	chr19	51487305	-	40709461		CTAAAACACCCCCRCCTACATTTACRATTCTAATTATCTAAAACCCTAAC		II			NA	NA	NA	NA	NA	NA		OpenSea	CGGAGCCGACTCTGGGACACCCCCGCCTGCATTTGCGGTTCTGGTTATCTGGAACCCTGA[CG]CAGCGAGAGCAATTGGCACCACTGCACTCTCTCTCCACCCTCCCTCCGAAGGACGGGCGG	TGGGACACCCCCGCCTGCATTTGCGGTTCTGGTTATCTGGAACCCTGACG			KLK7;KLK7	NM_005046;NM_139277	TSS200;TSS1500				19:56179057-56179276				0.149583	0.121602	0.0279806	526	220	746
cg07302938	-0.440536	0.214892	-3.18048	0.00209444	0.999978	-1.77806	chr7	12729527	+	16672399		TTAAAACTCRAAACACATACAAATTATCTTTTACATTTTCATTCTACAAC		II			NA	NA	NA	NA	NA	NA	chr7:12726156-12727248	S_Shelf	GTTTTTATATATTTTTGTAGTGTGTTGAGAAGAGCAAAAGCTTTATAAATATACCTGATG[CG]CTGTAGAATGAAAATGTAAAAGATAACCTGTATGTGTTCCGAGCTTTAATTTTTTGTTTA	CGCTGTAGAATGAAAATGTAAAAGATAACCTGTATGTGTTCCGAGCTTTA			ARL4A;ARL4A;ARL4A	NM_001037164;NM_212460;NM_005738	3'UTR;3'UTR;3'UTR		CDMR						0.508896	0.581449	0.0725525	735	11	746
cg00620552	-0.264902	-3.39872	-3.7305	0.000356225	0.999978	-0.598989	chr2	48010097	+	27684319	64648403	ATAAATAAAAACAAAACTAACACACTAACAATAAAAAACCCACCCTACCA	ATAAATAAAAACGAAACTAACACGCTAACGATAAAAAACCCGCCCTACCG	I	C	Grn	NA	NA	NA	NA	NA	NA	chr2:48009808-48011443	Island	AGCCCCGCGGCGTGAGGGAAGGGGAGCTCAGCAGTTCCCCGCGCGGGGCCCAGGCGTCGG[CG]GCAGGGCGGGCCCCTCACCGCCAGCGTGCCAGCCCCGCCCCTACCCACCAGTGTGCCAGC	GTGGGTAGGGGCGGGGCTGGCACGCTGGCGGTGAGGGGCCCGCCCTGCCG			MSH6	NM_000179	TSS200				2:47863313-47864897				0.0832664	0.0968817	0.0136153	114	636	750
cg18000029	-0.280529	-1.18865	-3.22084	0.00185024	0.999978	-1.69588	chr6	164051859	-	56647486		AAACCAAAACTATTAAACRCAACCRAATAACTACTCAAAAAACTCATATC		II			NA	NA	NA	NA	NA	NA	chr6:164051485-164052323	Island	CGTGGGAGGGGGAGCCAGGGCTGTTGGGCGCAGCCGGGTAACTGCTCAGAGGGCTCATGT[CG]AGCCCCTCGGTTTCCTCCGTCCTCGCGAGTCAGGCGGCCTCTGCCGGGCGGGAGGCGGCA	AGCCAGGGCTGTTGGGCGCAGCCGGGTAACTGCTCAGAGGGCTCATGTCG									6:163971454-163972341				0.294639	0.331014	0.0363755	641	109	750
cg24763754	-0.188151	2.77031	-3.63103	0.00049703	0.999978	-0.821231	chr19	1516166	+	67678333		CRAAAAAAATCCCAACTCTACRTAACCCCTACTAATACCCAAAAACAAAC		II			NA	NA	NA	NA	NA	NA	chr19:1512961-1514034	S_Shelf	GGTGGGGCCTCCCCATCCCTGCCCCACAGACCCCTGGACCCCCCGGTCCCTGGGGCTGTC[CG]TCTGTTCCTGGGCACCAGCAGGGGCCACGCAGAGTTGGGACCCTCCCCGGCTGGAGTCAC	GGGGAGGGTCCCAACTCTGCGTGGCCCCTGCTGGTGCCCAGGAACAGACG													0.865669	0.88063	0.0149617	171	582	753
cg23904247	-0.333994	-3.01634	-3.32725	0.00132819	0.999978	-1.4758	chr14	102554826	-	20728314		TACTCAAAAACAAAAATTTTCAAACTACRACCTAAAACCCCCTTAAAAAC		II			rs3809386	0.289486	NA	NA	NA	NA	chr14:102552721-102554068	S_Shore	GAAACGCAACTTGCTCAGGAGCAGGGGTTTTCAGACTGCGGCCTGGGACCCCCTTAAGAG[CG]TGTGAAATCAACATAAAGCGTCTTGCCTGGCATTACAAAGCGGGGGAAGTGGAAGGAAAC	CGCTCTTAAGGGGGTCCCAGGCCGCAGTCTGAAAACCCCTGCTCCTGAGC			HSP90AA1;HSP90AA1	NM_005348;NM_001017963	TSS1500;Body				14:101624474-101624817				0.104941	0.129346	0.0244053	457	297	754
cg17407677	-0.396419	-1.08068	-3.17946	0.00210093	0.999978	-1.78012	chr5	50266228	+	67632317		ACTCCTCTAACTATCCTACCCTTTAAATACTAAACAATTAATCCACAAAC		II			NA	NA	NA	NA	NA	NA	chr5:50265085-50265737	S_Shore	TACATATCATTTGTTTACCAAATCAGTTCGTATTTTCTTAGCCCAGGGTTCAGGATTTTG[CG]TTTGTGGATTAATTGCCCAGTACCCAAAGGGCAGGACAGTCAGAGGAGCCACCTGATGCA	CTCCTCTGACTGTCCTGCCCTTTGGGTACTGGGCAATTAATCCACAAACG							RDMR						0.30437	0.36517	0.0607995	738	22	760
cg27645955	-0.322124	-3.81235	-3.68467	0.00041559	0.999978	-0.701848	chr22	21386885	+	16743317	63806469	AACAACAAATAAAACCACACAAAAAACCTAAAATAAAAACAAACCCTACA	AACAACGAATAAAACCGCGCGAAAAACCTAAAATAAAAACGAACCCTACG	I	C	Grn	NA	NA	NA	NA	NA	NA	chr22:21386493-21387000	Island	GCTGCCGCAGCCGCTGCCTCCGCTCTGAGCACTGAGCCCGCCCAGTTCGCCGGCGCCGAG[CG]CAGGGCCCGCCCCCATCCCAGGCCCCCCGCGCGGCCCCACCCGCTGCCACACACCCAGAT	CGCAGGGCCCGCCCCCATCCCAGGCCCCCCGCGCGGCCCCACCCGCTGCC			SLC7A4	NM_004173	TSS200			TRUE	22:19716534-19717000	22:21386776-21387091	Unclassified_Cell_type_specific	TRUE	0.0633349	0.0772844	0.0139495	142	619	761
cg04883903	0.354982	-3.65944	3.70914	0.000382812	0.999978	-0.647028	chr12	117798954	+	14631347	71622346	AAAAAATACAAAACAAACAAACAAATACACAACACAAAAAAACAACCTCA	AAAAAATACGAAACGAACGAACGAATACGCAACGCGAAAAAACAACCTCG	I	A	Red	NA	NA	NA	NA	NA	NA	chr12:117798076-117799448	Island	CGGAGAAGGGGCGCGGGACGCCTGGATCAGGAACTCACCTGACGCCGAGCCGGGCAGCGC[CG]AGGCTGCCTCTTCGCGCTGCGCACCCGCCCGCCCGCCTCGTACTCCTCCTCTTCCTCCCG	GAGGAGTACGAGGCGGGCGGGCGGGTGCGCAGCGCGAAGAGGCAGCCTCG			NOS1	NM_000620	5'UTR		DMR		12:116282298-116283831			TRUE	0.080753	0.0670883	0.0136647	129	634	763
cg02988698	0.27192	-2.93262	3.46365	0.000859871	0.999978	-1.18655	chr16	17463620	+	21794374		AAAAAAAAACAATAAATACTAAAAACCTCTTCCTATTCTACCTTCTACAC		II			NA	NA	NA	NA	NA	NA		OpenSea	CATCTTCCTCTAGCTCAACAGTCTTGACTTTTCAGGGCCGTGACCCAGAAGGGAGGTGCC[CG]TGCAGAAGGCAGAACAGGAAGAGGTTCTTAGCACCCACTGTTTTCTCTTCCTGCACAGCC	AGAGAAAACAGTGGGTGCTAAGAACCTCTTCCTGTTCTGCCTTCTGCACG			XYLT1	NM_022166	Body			TRUE		16:17463214-17463971	Unclassified_Cell_type_specific		0.124926	0.106408	0.0185175	308	456	764
cg06167730	-0.19866	2.6409	-3.50933	0.000741569	0.999978	-1.08797	chr8	991533	-	34671354		TATACCTATTTCTCCTATTTCTAAAAAAAATATTCTCTAAACCCCTTACC		II			NA	NA	NA	NA	NA	NA	chr8:991532-991862	Island	TCCTGTATTTCTGTGCCTGTTTCTCCTGTTTCTGAGAAAAGTGTTCTCTGAGCCCCTTGC[CG]TGGGTGAGTGTTCTCCGAACCCCTTGCCGTGGGTGAGTGTTCTCCGAACCCCTTGCCGTG	CGGCAAGGGGCTCAGAGAACACTTTTCTCAGAAACAGGAGAAACAGGCAC									8:978685-979306				0.854328	0.871383	0.0170555	264	502	766
cg16037021	0.307544	-2.36167	3.28224	0.00152937	0.999978	-1.56949	chr12	107168324	-	49621483	59704474	TCCTAAACCTTATCAAAAACAACCATAAAACACCAATTACTAAAAAAACA	TCCTAAACCTTATCAAAAACGACCGTAAAACGCCGATTACTAAAAAAACG	I	A	Red	NA	NA	NA	NA	NA	NA	chr12:107167762-107168747	Island	GCCTCGACCGAGTCCTGGGCCTTGTCAGGGGCGGCCGTGAGGCGCCGGTTGCTGGGGGAG[CG]GTGACGTCGCGGGGTGAAAGTTGAGGGGCGGTGACGTCGGGCCGGCCCGGGCGGAGGCTG	CGCTCCCCCAGCAACCGGCGCCTCACGGCCGCCCCTGACAAGGCCCAGGA			RIC8B	NM_018157	TSS200	high-CpG:105692283-105692623			12:105691857-105693038	12:107167428-107169230	Promoter_Associated		0.17633	0.149612	0.0267184	524	242	766
cg25310617	0.182232	0.814047	3.25944	0.00164191	0.999978	-1.61662	chr19	58257751	+	64717492		AATACATATCCTTCTAAAATAAAAAATAATCTCACCTAACCTTAAAACCC		II			NA	NA	NA	NA	NA	NA	chr19:58258088-58258619	N_Shore	AATATTTTTTCAAATACTTGAGTGATCAGTTACAGACACTAATCTCCAAAAATCTCAATA[CG]GGTTCTAAGGCTAGGTGAGACTATCCTCTACCCTAGAAGGACATGCACTTTAAGGACAGG	CGGGTTCTAAGGCTAGGTGAGACTATCCTCTACCCTAGAAGGACATGCAC			ZNF776	NM_173632	TSS1500					19:58257683-58258774	Promoter_Associated		0.646839	0.618521	0.0283181	559	210	769
cg02893550	-0.407508	-0.931511	-3.17144	0.00215305	0.999978	-1.79635	chr16	89119418	+	59705369		TATCCCAAAAAACCTAACAAAAAAAAATACRCCCAATCAAAAAACTCCTC		II			NA	NA	NA	NA	NA	NA	chr16:89119306-89119664	Island	GCTCTCCCTCTTACGTAAACCACCAGGAAGAAGAAGAGGAAACACGGATCCACGTCACAT[CG]AGGAGCCTCCTGATTGGGCGTACCTTCCCCTGCCAGGTCCCCTGGGACACACGCCAGCCC	CGAGGAGCCTCCTGATTGGGCGTACCTTCCCCTGCCAGGTCCCCTGGGAC									16:87646786-87648030	16:89118712-89119741	Unclassified_Cell_type_specific		0.325033	0.391549	0.0665165	753	16	769
cg18237323	-0.286082	-3.53028	-3.52172	0.000712252	0.999978	-1.06109	chr8	22089615	+	38806334	43795418	ACACAACCACTAATCCCATTAATAAAAACAAATTCAATCTAACTCTCTCA	ACGCAACCGCTAATCCCATTAATAAAAACAAATTCGATCTAACTCTCTCG	I	T	Red	NA	NA	NA	NA	NA	NA	chr8:22089367-22089668	Island	AGAGGCAAGAGCGAAATCAAAGCAGCGTGGAGGAGAGAGAGGCAGAGAAGGGAGAAAGAA[CG]AGAGAGCCAGACCGAATCTGCCTCCACCAATGGGATCAGCGGCTGCGCAGCGTCAGGTGA	CGAGAGAGCCAGACCGAATCTGCCTCCACCAATGGGATCAGCGGCTGCGC			PHYHIP;PHYHIP;PHYHIP;PHYHIP	NM_014759;NM_001099335;NM_014759;NM_001099335	1stExon;5'UTR;5'UTR;1stExon			TRUE	8:22145345-22145561				0.0757538	0.0921504	0.0163966	255	516	771
cg03056811	-0.271353	2.40991	-3.33881	0.00128068	0.999978	-1.45159	chr1	160639913	+	53641505		CTAACTTTAACCRTTAACACAAACTTAATACTACTTAAAATTCRAAAAAC		II			NA	NA	NA	NA	NA	NA		OpenSea	CTTCCCCATTCCTTCTCTCCCCGTTCCCGTTTCTCCCCCCAACCACCACACCCCGCCCCC[CG]CCCCCCGAACTCCAAGCAGCACCAAGTCTGTGCCAACGGCTAAAGTCAGTAGAAAGGAGC	TGACTTTAGCCGTTGGCACAGACTTGGTGCTGCTTGGAGTTCGGGGGGCG									1:158906373-158906545				0.830442	0.85354	0.023098	441	330	771
cg04462627	0.305538	-2.16057	3.23909	0.00174883	0.999978	-1.65849	chr16	58019123	-	49631485	40768426	CAAATAAACACTCAAAAAAAACTTTCTATTCACAACAAAAAATCTCAACA	CGAATAAACGCTCGAAAAAAACTTTCTATTCGCAACGAAAAATCTCAACG	I	A	Red	NA	NA	NA	NA	NA	NA	chr16:58018400-58019471	Island	CCTGGGGGGGGGCGGATGAGCGCTCGAGAGGGGCTTTCTGTTCGCAGCGGAGGGTCTCAG[CG]GCTACGCGGTGCGGTACTTGAAGCCCGACGTGACCCAGACCTGGCGGGTAGGGAGCGCTG	CGGATGAGCGCTCGAGAGGGGCTTTCTGTTCGCAGCGGAGGGTCTCAGCG			TEPP;TEPP	NM_199456;NM_199046	Body;Body		DMR	TRUE	16:56575902-56577024	16:58018464-58020013	Unclassified_Cell_type_specific	TRUE	0.198169	0.166854	0.0313144	611	161	772
cg17141735	-0.18984	3.06385	-3.78375	0.000297385	0.999978	-0.478484	chr1	149890522	+	70713486		ATATATATCAACATTCTAAAACCTCCACATTTAATAAAACAAAATCACAC		II			NA	NA	NA	NA	NA	NA		OpenSea	TCATCTGGAAAAGGGGGGCTTGGACTAGATACTGCATCAGGTCCCTCTCAGATCTAATAG[CG]TGTGATTCTGCCTTACTAAATGTGGAGGCTTCAGAATGCTGATATATATACATGGAGAAG	TATATATCAGCATTCTGAAGCCTCCACATTTAGTAAGGCAGAATCACACG			SV2A	NM_014849	TSS1500								0.887601	0.900514	0.0129136	98	675	773
cg03904799	-0.161744	1.75318	-3.40513	0.00103759	0.999978	-1.31161	chr10	134751673	-	33664346		TTAATAACAACCTATACRATAACCCCTCAAAACTAAAACCCAACAAAACC		II			NA	NA	NA	NA	NA	NA	chr10:134755663-134756852	N_Shelf	TGACCGAAGCATTGGTGACAGCCTGTGCGGTGACCCCTCAGGGCTGAGACCCAGCAAGGC[CG]GCCTGCCCTGTGCTGCCCCAACTTCCTCGCAGGGCTGCCTGGGCTCCGCATGTGCTGACT	TGGTGACAGCCTGTGCGGTGACCCCTCAGGGCTGAGACCCAGCAAGGCCG			C10orf93	NM_173572	Body				10:134601528-134601712				0.763026	0.782967	0.019941	362	412	774
cg25820224	0.237842	-1.45257	3.24472	0.0017186	0.999978	-1.64692	chr2	95787551	+	18699466	15749367	AATCACAATAAACAATAAACAAAACTACCCTAAACAAAAACCAAAACACA	AATCGCGATAAACGATAAACAAAACTACCCTAAACGAAAACCGAAACGCG	I	A	Red	NA	NA	NA	NA	NA	NA	chr2:95787089-95787951	Island	TACACAGCACGGGGAGGCAGCCCACAGCGCGCACCGCGGTCGCCATGCTGGAGTCCGAGC[CG]CGCCTCGGCCTCCGCCCAGGGCAGCCTTGCCCACCGCCTACCGCGACTGCTCCTCGTCAA	CGCGCCTCGGCCTCCGCCCAGGGCAGCCTTGCCCACCGCCTACCGCGACT			MRPS5;MRPS5	NM_031902;NM_031902	5'UTR;1stExon	high-CpG:95151243-95151500			2:95150851-95151661	2:95786866-95788446	Promoter_Associated		0.280944	0.250385	0.0305595	601	173	774
cg11772919	-0.239373	-2.08916	-3.30966	0.00140367	0.999978	-1.51252	chr6	33245328	+	34683303	41628404	AATTAAAAATCAAAAAACAAAACAAAACCAAAAACAACCCCAATAAAACA	AATTAAAAATCAAAAAACGAAACAAAACCAAAAACGACCCCGATAAAACG	I	A	Red	rs62639320	0.01282	NA	NA	NA	NA	chr6:33244677-33245554	Island	GCCTTCGGGGTTGGGGGAGGAGCTGCTGAGCCTCTCACTAGCCTCCCTGCTCCCAGCCCC[CG]CCTCACCGGGGCCGCCCCTGGCCCTGCCCCGCCTCTTGATCCCCAACCAGGAAGCTTGCA	GGTTGGGGATCAAGAGGCGGGGCAGGGCCAGGGGCGGCCCCGGTGAGGCG			B3GALT4	NM_003782	1stExon			TRUE	6:33352687-33353910	6:33244505-33246488	Promoter_Associated	TRUE	0.183703	0.208168	0.024465	480	295	775
cg01149683	-0.170154	0.207241	-3.24779	0.00170235	0.999978	-1.64062	chr3	66705803	-	21758400		AATTCTAAATAAAACTCAACCCTACCCTAACCTTACAAAAATCCCTATAC		II			NA	NA	NA	NA	NA	NA		OpenSea	AACATTCTGCTAGTTCTGGGTAGAACTCAGCCCTGCCCTGGCCTTACAGGAATCCCTATA[CG]TTGATGAGAGTGTCTGGTGGAATAGTGGGGCAAGGGTGGCTGAGATTCTGTTTCCTGGCA	GTTCTGGGTAGAACTCAGCCCTGCCCTGGCCTTACAGGAATCCCTATACG								TRUE					0.524903	0.554316	0.0294127	590	187	777
cg14459046	0.212896	-1.17107	3.23614	0.00176486	0.999978	-1.66454	chr5	173728459	+	28719322		CAACAACRACTATCATTAAACAAAAAATATTAAAACAAAACCTTTCATTC		II			NA	NA	NA	NA	NA	NA		OpenSea	GAGATAAGGAGGACCAGGGAGGGCTCCAGGGAATCCGACTCCCTGGGCAAGGCTCTTCCC[CG]AATGAAAGGCTCTGCCTCAACACCCTCTGTCCAATGACAGTCGCTGCTGCTACCAAGGAC	AGCAGCGACTGTCATTGGACAGAGGGTGTTGAGGCAGAGCCTTTCATTCG								TRUE					0.320461	0.289428	0.0310329	615	165	780
cg26119806	-0.297091	0.821734	-3.19016	0.00203327	0.999978	-1.75842	chr2	18061572	-	66727324		ACAAACTCCACTTCTTACCTAAATAATAACCTTCTTAAAAAAATTAACTC		II			NA	NA	NA	NA	NA	NA	chr2:18059493-18060920	S_Shore	TGGTGTAATGTGCAGGCTCCACTTCTTACCTGGGTGGTGACCTTCTTGAGGAGATTGACT[CG]TTCAGTATGCATTTCCAACCAGCCCGCCATGGGCCAGGCCCCAGGATGCACTCGGGGACA	CGAGTCAATCTCCTCAAGAAGGTCACCACCCAGGTAAGAAGTGGAGCCTG			KCNS3	NM_002252	5'UTR		RDMR						0.621253	0.662223	0.0409704	719	61	780
cg21980685	-0.330586	-3.93843	-3.70666	0.000386021	0.999978	-0.652597	chr6	90348553	-	17745408	71650444	AACCCAATTTCCTAAAAAACAACCCACAAATTACTCTCAAACTAAAAACA	AACCCGATTTCCTAAAAAACGACCCGCGAATTACTCTCGAACTAAAAACG	I	C	Grn	rs2236025	0.028055	NA	NA	NA	NA	chr6:90348167-90348564	Island	AGGGGTGTGGCGAGCCCGGTTTCCTAGGAGACGGCCCGCGGGTTGCTCTCGGACTGAGAG[CG]CGAGGCTTCGGGACTGAGCCCTAGCTGCTGCGCTGGCCGAAGTTTTCTCGTCGGTAAAAT	AGCCCGGTTTCCTAGGAGACGGCCCGCGGGTTGCTCTCGGACTGAGAGCG			LYRM2;LYRM2;LYRM2;LYRM2	NR_028495;NR_028494;NR_028493;NM_020466	TSS1500;TSS1500;TSS1500;TSS200				6:90404844-90405314	6:90347792-90348810	Promoter_Associated		0.0583739	0.0717388	0.0133649	132	650	782
cg25495844	0.333334	-3.46334	3.53457	0.000682991	0.999978	-1.03314	chr22	45560678	-	44717430	14703494	CCCACCAAAAATAAAAAACTAACAAAACTATCCTAACATAATCTTCTCCA	CCCGCCGAAAATAAAAAACTAACAAAACTATCCTAACGTAATCTTCTCCG	I	T	Red	rs132852	0.290337	NA	NA	NA	NA	chr22:45560511-45560783	Island	CTCCCCTGCGGCCCCGCCGGAGGTAGGGGGCTGGCAGGGCTGTCCTGGCGTGGTCTTCTC[CG]TTTCCTTCCTAGCGATTCCTCTCGAGCTTCCTCTCCCCCTGGCCGCCCCTCGTCTCTCTT	CGGAGAAGACCACGCCAGGACAGCCCTGCCAGCCCCCTACCTCCGGCGGG			NUP50;NUP50	NM_007172;NM_153645	5'UTR;5'UTR				22:43937903-43939447				0.091596	0.0756422	0.0159538	242	542	784
cg09751728	-0.242802	3.19004	-3.64428	0.000475618	0.999978	-0.791857	chr7	137545862	-	67701367		AAATATCAACTCCTTAAAAACAAAAAACCTTATAATTCTATTACTTCCCC		II			NA	NA	NA	NA	NA	NA		OpenSea	TCTGCCAGTTAGAGTGTCAGCTCCTTGAGAGCAAGAAGCCTTATGGTTCTATTGCTTCCC[CG]ACAGTATCCAATAATGCTCTGCCCAGGATAGTAAATTATGAGTAATCAATTGATTGCTTG	CGGGGAAGCAATAGAACCATAAGGCTTCTTGCTCTCAAGGAGCTGACACT								TRUE					0.894673	0.908612	0.0139394	164	621	785
cg04786857	-0.42265	-4.36119	-3.61469	0.000524727	0.999978	-0.857398	chr2	29033897	+	65614469	53612451	AAAACAAAACTAAAACACTACCTTCTCATCTAAAACAAACAATAAAATCA	AAAACGAAACTAAAACGCTACCTTCTCATCTAAAACGAACGATAAAATCG	I	C	Grn	NA	NA	NA	NA	NA	NA	chr2:29033351-29034011	Island	GGGGCCTCGCAGGCGAATCTCCAGTTTCGAGTGTGCCCGGTCCCTGGGTTCGCTCGCCGG[CG]ACCCCACCGCCCGCCTTAGATGAGAAGGCAGCGCTCCAGCCTCGTCCTCACGCCGCCTCC	AGGACGAGGCTGGAGCGCTGCCTTCTCATCTAAGGCGGGCGGTGGGGTCG		TRUE	SPDYA;SPDYA	NM_182756;NM_001142634	5'UTR;5'UTR		DMR	TRUE	2:28886856-28887706	2:29033093-29034127	Promoter_Associated	TRUE	0.0441758	0.0584594	0.0142837	181	605	786
cg20434562	-0.233254	2.96942	-3.46437	0.000857882	0.999978	-1.18501	chr18	76320786	-	10669333		ATCAATATAAATTCATCAAAATATCTTTATTCAATACCTCTCTACATACC		II			rs73972233	0.012809	NA	NA	NA	NA	chr18:76322675-76323015	N_Shore	CAGGTAAATGCATCAATATGAATTCATCAAAATGTCTTTGTTCAGTACCTCTCTGCATGC[CG]CACTATTCACTGCAATATTAATAAAGGTAGAGAGAAGTGGTCCCAAACCTAAAGAAACTT	CGGCATGCAGAGAGGTACTGAACAAAGACATTTTGATGAATTCATATTGA							RDMR						0.878647	0.896212	0.0175646	307	483	790
cg20686554	0.155939	0.324227	3.27445	0.00156698	0.999978	-1.58562	chr11	5442443	-	65658345		TAATTTACTAAACTCCCTATAAAACCCAAATCCCAAAATACRATACCTCC		II			NA	NA	NA	NA	NA	NA		OpenSea	ACCACCAGAGTTGATTTACTGGGCTCCCTGTGGGACCCAGGTCCCAAGATGCGATGCCTC[CG]TGTAATCCTGAAGCGACCTGCCACACCTTCCACCCTCCAGACTAGAGATCTGCAAGGGGC	CGGAGGCATCGCATCTTGGGACCTGGGTCCCACAGGGAGCCCAGTAAATC			OR51Q1	NM_001004757	TSS1500								0.565244	0.538973	0.0262709	537	253	790
cg21497602	0.44966	-4.73117	4.92253	4.51911e-06	0.954223	2.30932	chr12	12715811	-	39643452	19673486	TCAAATCATATTCCCTTCCAAAATCCAACAACTCTAAAACAAATTCCACA	TCAAATCATATTCCCTTCCAAAATCCGACGACTCTAAAACAAATTCCGCG	I	A	Red	NA	NA	NA	NA	NA	NA	chr12:12714633-12715200	S_Shore	CTCGGGGAGGGGTCAGGTCATGTTCCCTTCCAGAGTCCGGCGACTCTGAGGCAGGTTCCG[CG]GGCGCCGCTGGGAGGAGCCGGAGCTGCCGGAGGAGGCGGCCCCGCGGCCTCCTCCCCCAC	TCAGGTCATGTTCCCTTCCAGAGTCCGGCGACTCTGAGGCAGGTTCCGCG			DUSP16	NM_030640	TSS1500	high-CpG:12606795-12607186			12:12605732-12607330				0.0415197	0.0311272	0.0103926	2	791	793
cg24298648	-0.249275	2.57217	-3.31538	0.00137867	0.999978	-1.50059	chr7	105918135	-	24609371		ACTTTTAACCTTCACAATAACACTATAAAAACCTAAATAACAACAACRAC		II			NA	NA	NA	NA	NA	NA		OpenSea	TGAGGATGATCACTTTTAGCCTTCACAGTGACACTATGAAAACCTGGATGACAGCAACGG[CG]GTGGCAGCAAAGTAAAGCAGCAAAGTAAAAAAAAATCCTGTTTTGTAATCTCCCTTTGTC	CGCCGTTGCTGTCATCCAGGTTTTCATAGTGTCACTGTGAAGGCTAAAAG			NAMPT	NM_005746	Body			TRUE		7:105917966-105918145	Unclassified_Cell_type_specific		0.845204	0.868482	0.023278	471	323	794
cg11265433	-0.237431	3.66454	-3.92379	0.000183661	0.999978	-0.156708	chr11	129903006	-	53801317	70633414	TCATCCAAAAATTAATAATCCTTATACAACCACTACTCATCAAACAACCA	TCATCCAAAAATTAATAATCCTTATACAACCGCTACTCGTCGAACGACCG	I	C	Grn	NA	NA	NA	NA	NA	NA	chr11:129902811-129903119	Island	AGTGTCTTGCCATCATCCAAGAGTTGGTAGTCCTTGTACAGCCGCTGCTCGTCGGGCGGC[CG]CTTGAGGATTCCCTCCACGACGCGCTTCAGCTCGAACACCGTGCTGGACTCCTTGGCGTC	CGGCCGCCCGACGAGCAGCGGCTGTACAAGGACTACCAACTCTTGGATGA									11:129408034-129408416				0.92154	0.933272	0.0117324	66	729	795
cg18792689	-0.232972	1.91482	-3.26938	0.00159191	0.999978	-1.5961	chr1	109254098	-	48690499		AAAATACACACACACAAAATACAAATCCTTTATAAAATATATATTTTCCC		II			rs61797272	0.046203	NA	NA	NA	NA		OpenSea	ACTGGGTTTTGAGAATACACACACACAGAATACAAGTCCTTTATAAGATATATATTTTCC[CG]CAGTCTGTGGCTTATCTTTTCATTCCCTTAATAGTGCAGATATTCTTCATTTTAATGAAG	CGGGAAAATATATATCTTATAAAGGACTTGTATTCTGTGTGTGTGTATTC			FNDC7	NM_001144937	TSS1500								0.778559	0.804913	0.0263541	548	249	797
cg16895792	-0.343352	-3.28262	-3.45536	0.000883179	0.999978	-1.20436	chr1	9711653	-	48766422	16600336	CTAAAATAATACCCCTCTAACAATAAACAAACTAAAAAATATAAACAACA	CTAAAATAATACCCCTCTAACGATAAACGAACTAAAAAATATAAACGACG	I	A	Red	rs7516138	0.374886	NA	NA	NA	NA	chr1:9711780-9713001	N_Shore	TTCCAGAGGCACCTGGGATGATGCCCCTCTAGCGGTAGGCGAACTGGGGAGTGTGGGCGG[CG]GGGGAAGGCGAGGCCCTGGAGGACCTGTTGTTTTTCCTGTTGCAAGTGAAAAGGAAACAA	CGCCGCCCACACTCCCCAGTTCGCCTACCGCTAGAGGGGCATCATCCCAG			PIK3CD	NM_005026	TSS200				1:9634212-9635193			TRUE	0.0898871	0.107695	0.017808	318	480	798
cg13026370	0.160826	-0.667071	3.27528	0.00156295	0.999978	-1.58391	chr18	8367098	-	43761313	60682407	TACAAACCCCACACTCTCCAAACACAAAAACTCTAAATACAAAAAAAACA	TACGAACCCCACACTCTCCAAACACGAAAACTCTAAATACAAAAAAAACG	I	A	Red	NA	NA	NA	NA	NA	NA	chr18:8367273-8367599	N_Shore	ACAGGAAGCGACTGCGAGCCCCACACTCTCCAGACACGGAAACTCTAAATGCAGAGAGAA[CG]AAGCATATTTTGTCTTCCTTTTCCTTTTTTTTTTTAAGCAAAATAATAACTTGACACAAG	TGCGAGCCCCACACTCTCCAGACACGGAAACTCTAAATGCAGAGAGAACG			LOC100192426;PTPRM;PTPRM	NR_024419;NM_002845;NM_001105244	TSS200;Body;Body							TRUE	0.396299	0.370697	0.0256025	536	267	803
cg13985132	0.27114	1.03748	3.1854	0.00206312	0.999978	-1.76808	chr15	65394414	-	31672460		TACRAACTAAACTAAACACCCAAATTATAAAACCTAAACTACTAATTAAC		II			NA	NA	NA	NA	NA	NA	chr15:65394413-65395041	Island	GGGACCGAGGCTGCGGGCTGGGCTGGACACCCAGATTATGGGGCCTGGGCTGCTGATTGG[CG]GCCTTGGAGGGGCGGGCAGAATCCTTACCGCGACCGTAGGCTTGTGGCTCCGCAGCGGGG	GCGGGCTGGGCTGGACACCCAGATTATGGGGCCTGGGCTGCTGATTGGCG			LOC390595	NM_001163692	Body			TRUE	15:63181395-63182080	15:65393270-65394431	Unclassified	TRUE	0.684194	0.644981	0.039213	723	80	803
cg21028292	-0.260475	-2.64161	-3.37352	0.00114747	0.999978	-1.37856	chr3	129158769	-	35694322	12726365	CAAAATATAAAACAAAATAAAATATAAAACCTCTTCAACTCACAACACCA	CAAAATATAAAACGAAATAAAATATAAAACCTCTTCAACTCACGACACCG	I	A	Red	NA	NA	NA	NA	NA	NA	chr3:129158602-129159477	Island	CGCCGCAACGCCCAGGGTGTGGGGCGGAGTAAGATGTGAAACCTCTTCAGCTCACGGCAC[CG]GGCTGCAACCGAGGTCTGAATGTTGCGAAAGCGCCCCAGACGCCGCCGCTGCTTTCCGGC	CAGGGTGTGGGGCGGAGTAAGATGTGAAACCTCTTCAGCTCACGGCACCG			IFT122;IFT122;MBD4;IFT122;MBD4;IFT122	NM_052985;NM_052989;NM_003925;NM_052990;NM_003925;NM_018262	TSS200;TSS200;1stExon;TSS200;5'UTR;TSS200	high-CpG:130641405-130641584			3:130641263-130642204	3:129158073-129160037	Promoter_Associated		0.133103	0.153513	0.0204094	403	402	805
cg27353629	0.196426	2.29246	3.4138	0.00100923	0.999978	-1.29316	chr8	144309591	+	65741328		CTAACTATTAAATAACCTAAAACTAACCCCACACTCATTCCTATCATATC		II			rs61652900	0.033821	NA	NA	NA	NA	chr8:144311708-144311985	N_Shelf	CACAGAGAGGCCAGTGCCATGAGAGAAGTGCCGTCATGCCTGGGAGGATGTGAGGATGAG[CG]ATATGACAGGAATGAGTGTGGGGTCAGCCCCAGGCCACCTAACAGCCAGGCCAGAGGTTG	TGGCTGTTAGGTGGCCTGGGGCTGACCCCACACTCATTCCTGTCATATCG												TRUE	0.835823	0.817189	0.0186344	355	451	806
cg24708831	-0.17391	-1.74382	-3.36745	0.00116976	0.999978	-1.39136	chr14	100070564	-	18642509	65727403	ACCACAATACCAAACACTCTCAAAATTCTAAAAAAACAAACAAAAACCCA	ACCGCGATACCGAACGCTCTCAAAATTCTAAAAAAACAAACGAAAACCCG	I	C	Grn	NA	NA	NA	NA	NA	NA	chr14:100069475-100071813	Island	GCTGCGTCGGCGGCCGCGGTGCCGGGCGCTCTCAGGGTTCTGGAGAAGCAGGCGGAGGCC[CG]CCCCCGGCCCAGCTCCCGGAGCCCCCGCCGCCCCGCCCACCCCGGGCGGAGAGTGGGCGG	GCCGCGGTGCCGGGCGCTCTCAGGGTTCTGGAGAAGCAGGCGGAGGCCCG			CCDC85C;CCDC85C	NM_001144995;NM_001144995	5'UTR;1stExon	high-CpG:99139956-99140398			14:99138944-99141655	14:100070528-100070940	Promoter_Associated		0.223566	0.244172	0.0206064	408	398	806
cg03384579	0.293673	-2.46549	3.27734	0.00155295	0.999978	-1.57965	chr2	70995440	+	13702473	52759407	AAATACTACAAAACAAAACCACTACAAAACAATAAAAAACACTACAAACA	AAATACTACGAAACGAAACCGCTACGAAACGATAAAAAACGCTACGAACG	I	A	Red	NA	NA	NA	NA	NA	NA	chr2:70994447-70995385	S_Shore	ACAGCGCCCCCTCCAGCAGGCCGCGCCGGCCGCCCGAGGGCCGCGGTGCTGCAGTGCCCC[CG]CCCGCAGCGCCCCCCACCGCCCCGCAGCGGCCTCGCCCCGCAGCACCCCCACTACCGCCC	CGCCCGCAGCGCCCCCCACCGCCCCGCAGCGGCCTCGCCCCGCAGCACCC			ADD2;ADD2;ADD2;ADD2;ADD2	NM_017484;NM_017483;NM_017482;NM_017488;NM_001617	TSS200;TSS200;TSS200;TSS200;TSS200	high-CpG:70848621-70849042	DMR		2:70847937-70849054	2:70994051-70995730	Unclassified_Cell_type_specific	TRUE	0.165821	0.140591	0.0252302	531	275	806
cg00562312	0.156016	1.41967	3.43007	0.000957989	0.999978	-1.25849	chr5	178752999	+	43744423		CAAAACRAAAAAACAACCTTTATTAAAAAAACRCTCTAATCCCTTCCTCC		II			rs72648842	0.244296	NA	NA	NA	NA		OpenSea	CTCCGGATTCACTCCCAAAGGAGAACGGCCAGGCGGCCAAGTCCTCCCAGCTGAGGGGTG[CG]GAGGAAGGGATCAGAGCGCTCCCCCAACAAAGGCTGCCTCTCCGTCCTGCACATCCCCTC	AGGACGGAGAGGCAGCCTTTGTTGGGGGAGCGCTCTGATCCCTTCCTCCG			ADAMTS2;ADAMTS2	NM_021599;NM_014244	Body;Body			TRUE	5:178685605-178686410				0.733671	0.715452	0.0182195	338	470	808
cg03897452	0.202341	1.56543	3.26539	0.0016118	0.999978	-1.60434	chr12	130707370	-	16669338		AATAACTTCCRCRTATTTAACACTTTATTCTCCCTTACTCCTAAAAACCC		II			NA	NA	NA	NA	NA	NA		OpenSea	TGAGTTATGCAAATAACTTCCGCGTGTTTGACACTTTGTTCTCCCTTGCTCCTGAAAACC[CG]CCGCAAAGCTTGCCATGCGCCCCGCGTCATCCTGGCGTCTGCCTCCTTTGGCAGGGGAAT	ATAACTTCCGCGTGTTTGACACTTTGTTCTCCCTTGCTCCTGAAAACCCG									12:129273283-129273361				0.755288	0.72927	0.0260181	552	256	808
cg23588049	-0.326313	-3.00903	-3.35473	0.00121787	0.999978	-1.41816	chr12	75784862	-	51692442		AAAACTTACTTACRTCCTCCRTAAATTAACAAATCACTAAAACRACCAAC		II			NA	NA	NA	NA	NA	NA	chr12:75784799-75785241	Island	GGAGGCGGGACAAGGCTTGCTTGCGTCCTCCGTAGATTGGCAGGTCACTGGGACGGCCAG[CG]CGTGCGCACTGGCCTGTCAGCGGCCGGTGGACCATGGAGGCCGCAAGGCCCTTCGCCCGG	AGGCTTGCTTGCGTCCTCCGTAGATTGGCAGGTCACTGGGACGGCCAGCG			GLIPR1L2	NM_152436	TSS200				12:74071122-74071500	12:75784337-75785318	Promoter_Associated	TRUE	0.106445	0.12747	0.0210248	422	387	809
cg11668749	-0.42368	-2.52804	-3.19085	0.00202898	0.999978	-1.75702	chr1	229568360	+	56773417	58676374	CAACCACAAAAAAATAACCCAAATCATATTTAAAACCTTCAACATACCCA	CAACCGCGAAAAAATAACCCAAATCATATTTAAAACCTTCAACGTACCCG	I	C	Grn	NA	NA	NA	NA	NA	NA	chr1:229567206-229570684	Island	CACCGGTGGTCCTGCCGGAGGCGTAGAGGGACAGCACGGCCTGGATGGCCACGTACATGG[CG]GGCACGTTGAAGGTCTCAAACATGATCTGGGTCATCTTCTCGCGGTTGGCCTTGGGATTG	CGGGCACGTTGAAGGTCTCAAACATGATCTGGGTCATCTTCTCGCGGTTG			ACTA1	NM_001100	Body				1:227633789-227635682				0.141662	0.179192	0.0375302	716	95	811
cg01182171	-0.229081	2.70599	-3.43344	0.00094769	0.999978	-1.25129	chr6	106252695	+	53669411		AAACTCTACCTATCTTAAAACTCAATAATAATAAATTCTCCTAAAAACAC		II			NA	NA	NA	NA	NA	NA		OpenSea	GGGGAAACATGATCAATGGCAAATTTTCTTTGTCTTCTTCACCAGGCCAGTTATTAGTTA[CG]TGTTCTTAGGAGAATTTACCACTATTGAGCCTTAAGATAGGCAGAGCTTTAAAATCAGCA	CGTGTTCTTAGGAGAATTTACCACTATTGAGCCTTAAGATAGGCAGAGCT								TRUE					0.858837	0.876751	0.0179141	336	476	812
cg05942459	0.580356	-1.18877	3.14636	0.00232396	0.999978	-1.84694	chr6	101846805	-	33666445	24706418	ACTAACAAAACACCTTTTATACCAAACTATAACTCACTATCAACATCTCA	ACTAACAAAACGCCTTTTATACCGAACTATAACTCGCTATCGACATCTCG	I	T	Red	NA	NA	NA	NA	NA	NA	chr6:101846766-101847135	Island	GGCAAAACCTTTGCTAGCAAAGCGCCTTTTGTGCCGGGCTGTGGCTCGCTATCGACATCT[CG]TCCGTTACCAAGGCTGGGTTTCCTACTGATTTCCCTCCTCCTCTGCTTTCACAGGCTCGC	GCTAGCAAAGCGCCTTTTGTGCCGGGCTGTGGCTCGCTATCGACATCTCG			GRIK2;GRIK2;GRIK2	NM_021956;NM_001166247;NM_175768	TSS200;TSS200;TSS200				6:101953488-101953918				0.349546	0.262519	0.0870271	812	4	816
cg10251446	0.236626	2.84159	3.45539	0.000883095	0.999978	-1.2043	chr3	187624824	+	17662450		ATACACTAAATAACCCRAATACACTATTTCTCCACAATTCTCTATTACTC		II			NA	NA	NA	NA	NA	NA		OpenSea	GTTGTTTGGAGTAATATTTGAGGTCTTGCTGAGTGAAATAAATAGACACTTCTGAAGAAT[CG]AGCAACAGAGAATTGTGGAGAAACAGTGTATTCGGGCCACTCAGTGCACACAGCCAGCTT	CGAGCAACAGAGAATTGTGGAGAAACAGTGTATTCGGGCCACTCAGTGCA								TRUE					0.881981	0.864965	0.0170155	317	503	820
cg06889108	0.140423	0.191608	3.31466	0.00138181	0.999978	-1.5021	chr5	173317342	-	62614359		ATACAAATTTCTTTCACCAAAAAAAAATCCCTACTACTTCRACTAATAAC		II			NA	NA	NA	NA	NA	NA	chr5:173314931-173315979	S_Shore	AATCAATGAAGATGCAAGTTTCTTTCACCAGGGAGGGGTCCCTGCTGCTTCGGCTAATAA[CG]GTGCTCTGTTGTTTCAAAATTTCCCCCATCATGTCAGCCCTGGCTTTGGAGGCAGCTTCT	TGCAAGTTTCTTTCACCAGGGAGGGGTCCCTGCTGCTTCGGCTAATAACG			CPEB4	NM_030627	1stExon	low-CpG:173249920-173250104		TRUE					0.541186	0.518756	0.0224304	473	347	820
cg14136186	-0.228568	-1.07516	-3.20065	0.00196886	0.999978	-1.73708	chr17	49242821	-	65736468		AAAAAAAACAAACRAACTCTCACCATCTCAAAACAATACCACTACTATAC		II			NA	NA	NA	NA	NA	NA	chr17:49243620-49244647	N_Shore	TCAGAGTCCTGAGGGGAAGCAAGCGGGCTCTCACCATCTCAGGGCAGTACCACTGCTGTG[CG]GCTGTCAGTCAGTGCTGCAGGCGCCGAGAGGAGGGGCTTGTGACCGCCCCAGGGAAGCTG	GGGGAAGCAAGCGGGCTCTCACCATCTCAGGGCAGTACCACTGCTGTGCG			NME2;NME2;NME2;NME1-NME2;NME2	NM_001018137;NM_002512;NM_001018138;NM_001018136;NM_001018139	TSS200;TSS1500;TSS1500;Body;TSS1500		RDMR						0.311666	0.344877	0.0332115	685	137	822
cg03658282	-0.204654	-3.51443	-3.98302	0.000149339	0.999978	-0.0185714	chr6	31588850	+	35634305		CAAAAATCACCCCCTAAAACCAAAACRATAAATAATTAAAAACAAACTAC		II			rs114469043	0.048219	NA	NA	NA	NA	chr6:31587779-31589024	Island	CCCCTCCCCCTCCGGTACCTCTACTCCGGGACCCGCACCTCCGGCAGTTCATTCAGGATC[CG]TAGTCTGCCCCTAACCACCCACCGTCTTGGCTTCAGGGGGTGACCCCTGCGCCTGGGTCC	AGGGGTCACCCCCTGAAGCCAAGACGGTGGGTGGTTAGGGGCAGACTACG			BAT2	NM_080686	5'UTR				6:31696373-31697198	6:31587577-31589180	Promoter_Associated		0.0773148	0.0881485	0.0108337	53	773	826
cg25170319	0.210664	0.16943	3.17165	0.00215171	0.999978	-1.79594	chr10	133957726	-	37682410	74660412	AAATTAAAAAAAATAACTCAAACCTCAACTAAAAACCTCAATAACACTCA	AAATTAAAAAAAATAACTCAAACCTCGACTAAAAACCTCGATAACACTCG	I	A	Red	NA	NA	NA	NA	NA	NA	chr10:133953845-133954279	S_Shelf	CCACAGCAAAGTGAATTAAGGGAGGTGGCTCAGACCTCGGCTAGAAGCCTCGGTGGCACT[CG]GGAGGGACTTCACAAACCAGGATGCGGACGGGGGAAGCGCCAGGGCTTTTCCTGTAGATG	GAATTAAGGGAGGTGGCTCAGACCTCGGCTAGAAGCCTCGGTGGCACTCG			JAKMIP3	NM_001105521	Body				10:133807505-133807717				0.543453	0.503915	0.0395375	752	74	826
cg17386710	-0.202732	3.30195	-3.91249	0.000191016	0.999978	-0.182926	chr7	70252335	+	66803329	16614395	CATTTATCTACATCTCTATCTCTATCATAAACTACAACAAACACACTACA	CGTTTATCTACATCTCTATCTCTATCATAAACTACAACGAACGCGCTACG	I	C	Grn	NA	NA	NA	NA	NA	NA	chr7:70254894-70255986	N_Shelf	CACCGAACGCCTCCGTCGTTCCCGACCCCTCCGCCCTGGCTGAAGCCAGGGGAGCTGGAG[CG]CAGCGCGTCCGCTGCAGCTCATGACAGAGATAGAGATGTAGATAAACGAGACTCATCTGT	CGCAGCGCGTCCGCTGCAGCTCATGACAGAGATAGAGATGTAGATAAACG			AUTS2;AUTS2	NM_015570;NM_001127231	Body;Body				7:69890214-69890283				0.903096	0.914094	0.0109984	69	760	829
cg01962750	0.170408	0.7891	3.23339	0.00177996	0.999978	-1.6702	chr2	8298983	-	60764476		TAAAATCTAAATATAAACAACCTTAACTATCRCCTACTCTCTAAACCCAC		II			NA	NA	NA	NA	NA	NA		OpenSea	TTGTAAGACTTTAAAATCTGAGTGTGAACAACCTTGACTGTCGCCTGCTCTCTGGGCCCA[CG]TCACTGAAAGCTAAGAAAACAGCTCCACTCAATGGACTAACATCACCGAGAACCTCCTTC	CGTGGGCCCAGAGAGCAGGCGACAGTCAAGGTTGTTCACACTCAGATTTT								TRUE					0.642901	0.614745	0.0281556	619	214	833
cg22906486	0.103705	-0.19128	3.49817	0.000768973	0.999978	-1.11214	chr5	178773355	-	47640427		CATCCAAAAACACCTAAACCCATTCTAAAACCAATTTACTATTAAAACCC		II			NA	NA	NA	NA	NA	NA	chr5:178770724-178772794	S_Shore	TTCCACCCAAGCATCCAAGGACACCTGGGCCCATTCTGGGGCCAGTTTGCTGTTAGAGCC[CG]TTGCCAACCGGAACCCCTCCCCAGTCCCTCCTCTCCAGCAAGGCCCTGATCCTCCCATGC	CGGGCTCTAACAGCAAACTGGCCCCAGAATGGGCCCAGGTGTCCTTGGAT			ADAMTS2;ADAMTS2	NM_021599;NM_014244	TSS1500;TSS1500		RDMR						0.472613	0.457056	0.0155571	274	561	835
cg25401612	0.226211	-2.15906	3.27648	0.00155713	0.999978	-1.58143	chr12	20009446	+	27802345		CACAACTCTACACAAAATACCATTAAAAAAAATACTTACCRTCCATACTC		II			rs11044902	0.044782	NA	NA	NA	NA		OpenSea	TATGACTGGGTTTTCTTTCTCAGTGTCTTGCTCAAGAGGTTACAGTATTTTTTTGTGTGA[CG]AGCATGGACGGTAAGTATTCCTTTCAATGGCATTTTGTGTAGAGTTGTGTCTGTGGTGGA	CGAGCATGGACGGTAAGTATTCCTTTCAATGGCATTTTGTGTAGAGTTGT								TRUE					0.193857	0.169776	0.024082	533	302	835
cg13315923	-0.299948	-1.07491	-3.14699	0.00231954	0.999978	-1.84568	chr3	171921695	+	37711318		TTCTAAACAAAATACCTTTATCTAACAATCACAATTCAATAAATCCCAAC		II			NA	NA	NA	NA	NA	NA		OpenSea	ACAAATGATTTTTGGGCCCGAATGTGATTGTGAATAGACAGACATAGCTTCTAAGAAAGC[CG]TTGGGACCCACTGAATTGTGACTGTCAGACAAAGGCATTTTGTTTAGAAGGCTTGTCCCA	TCTAAACAAAATGCCTTTGTCTGACAGTCACAATTCAGTGGGTCCCAACG			FNDC3B;FNDC3B	NM_001135095;NM_022763	Body;Body			TRUE					0.306108	0.359056	0.0529473	810	27	837
cg05622686	0.256727	3.84015	3.95593	0.000164197	0.999978	-0.0819029	chr16	58501611	-	33631361		TTATCCCATATAACATTCTAACTACCTAACTTTAAAACAATCTAATAACC		II			NA	NA	NA	NA	NA	NA	chr16:58497033-58498595	S_Shelf	TGAGCCGGGAGTTGTCCCATATGGCATTCTAACTGCCTGGCTTTGGGACAGTCTAATAGC[CG]TTCCACACTTCATTTTCCTCATCTGTAAAATGGGATCGTCGTGGTGCCTACCTGGCTGGG	CGGCTATTAGACTGTCCCAAAGCCAGGCAGTTAGAATGCCATATGGGACA			NDRG4;NDRG4;NDRG4	NM_020465;NM_022910;NM_001130487	5'UTR;5'UTR;Body								0.937516	0.926841	0.0106748	59	779	838
cg13872307	0.192419	2.22944	3.35259	0.00122613	0.999978	-1.42266	chr20	60376281	-	37624421		AACATAAACAACAACACCTCTCAATATCTACAAACTACAACRAAAAAACC		II			NA	NA	NA	NA	NA	NA	chr20:60373338-60373539	S_Shelf	TGGGGACAAAAGGCATGGACAGCAGCACCTCTCAGTGTCTGCAGGCTGCAGCGGGAGAGC[CG]GCAGAAAGCAGGGTGGTCCCCCGACACCTAGACATTGGGGGAGTGGGGTCAGGCAGCCTC	CGGCTCTCCCGCTGCAGCCTGCAGACACTGAGAGGTGCTGCTGTCCATGC			CDH4	NM_001794	Body								0.830053	0.810202	0.0198511	425	416	841
cg22462235	-0.2465	-0.679185	-3.15573	0.00225868	0.999978	-1.82808	chr1	226129481	+	71701366		ATTCCTAAAACTCCTAAAAACAATAAAACTACCAAATTTATATCCTAACC		II			NA	NA	NA	NA	NA	NA	chr1:226127112-226127695	S_Shore	GGTCCCTCAGGGTTGTCGCACCGTCCTTGCCCTCCCCCCATGACATCCTCTGTCTAGACA[CG]GTCAGGACACAAATCTGGCAGCTCTACTGTCTTTAGGAGTCCCAGGAACAGCAATTTCAG	CGGTCAGGACACAAATCTGGCAGCTCTACTGTCTTTAGGAGTCCCAGGAA		TRUE	LEFTY2	NM_003240	TSS1500								0.370777	0.412955	0.0421777	786	55	841
cg22880373	0.167914	-3.09252	3.95202	0.000166458	0.999978	-0.0910352	chr15	66994602	-	14766338		CRCCAAAATATCTAAACTAACATATAATAAAAAACAACCAATAACTCCRC		II			NA	NA	NA	NA	NA	NA	chr15:66993543-66996571	Island	CGCCGCGGAGCCGCCAAAGTGTCTAGACTGGCATATGATGGGAGGCAGCCAATGACTCCG[CG]GCGCTCCTCCGGGGGCCCTCAGTGTGCGTTTGAGGAGAACAAAAAAGAGAGAGAGAGCCG	GCCAAAGTGTCTAGACTGGCATATGATGGGAGGCAGCCAATGACTCCGCG			SMAD6;SMAD6	NM_005585;NR_027654	TSS200;TSS200				15:64781276-64782046				0.109411	0.0987784	0.0106322	60	782	842
cg27307729	-0.337286	-0.750474	-3.14418	0.00233941	0.999978	-1.85133	chr5	50264628	+	12633346		AAAAAACTATCTATATTACAAACAAACTTACTATCCCCTACCTCAAAAAC		II			rs1423229	0.010426	NA	NA	NA	NA	chr5:50265085-50265737	N_Shore	TGACCGTGGGCCAGGGAAGACCGGAGAGAGAGAAAGTAAAGTGTCCAGGACTGGAACTCA[CG]TCCCTGAGGCAGGGGACAGTAAGTTTGCTTGTAACACAGACAGTTTTCCTTGACTGCAGG	CGTCCCTGAGGCAGGGGACAGTAAGTTTGCTTGTAACACAGACAGTTTTC							CDMR		5:50300158-50300386				0.355536	0.410925	0.0553887	819	24	843
cg13575271	-0.255415	-3.84027	-3.80161	0.000279811	0.999978	-0.437819	chr9	140008980	-	34756486	69715377	TAAAAAAAAATCTTATTACCAAAACACTCAAAATTAAAATAATCCAAACA	TAAAAAAAAATCTTATTACCGAAACGCTCGAAATTAAAATAATCCAAACG	I	C	Grn	rs11145999	0.000457	NA	NA	NA	NA	chr9:140008309-140009473	Island	ACCAGGAAGCGCTGAGGGAAGGTCTTGTTGCCGAAGCGCTCGAAGTTGAAGTGGTCCAGA[CG]CTGCTGGAAGAAGCGCTCCTGGAAGCCGGGGTCCGGGGCCCTGCGGGCTGTGGGGGGACG	TGAGGGAAGGTCTTGTTGCCGAAGCGCTCGAAGTTGAAGTGGTCCAGACG			DPP7	NM_013379	Body	high-CpG:139128229-139129454			9:139128115-139129473				0.0624178	0.0734373	0.0110194	92	759	851
cg18075761	-0.321457	4.46598	-4.77608	7.98893e-06	0.993103	1.93183	chr7	75617028	+	35653322	47781311	TACAAACACTAAACAAACAACACACCATAAACCTCACTATAAATAAATCA	TACGAACGCTAAACGAACGACACACCATAAACCTCACTATAAATAAATCG	I	A	Red	NA	NA	NA	NA	NA	NA		OpenSea	CGCTACCACTCAGACCCGGGATGGGAGGAAAGGGGAATGTCCAGATGCCAGGGCCACTCC[CG]ACTCACCCACAGTGAGGTCCATGGTGTGCCGCTCGCCCAGCGCCCGCAGGCGGTAGAGGC	TGCGGGCGCTGGGCGAGCGGCACACCATGGACCTCACTGTGGGTGAGTCG			TMEM120A	NM_031925	Body				7:75454734-75455136			TRUE	0.952498	0.961534	0.00903559	3	850	853
cg02017348	-0.235477	3.14784	-3.49083	0.000787495	0.999978	-1.128	chr8	141046852	+	22695415		CACACRCRACATCTTAACTTCCAAAAAACCCCAAACATCAAATAAAAATC		II			NA	NA	NA	NA	NA	NA		OpenSea	CGCTGCAGAACTCAGAGCAGGGAGCCCATCTGTCCAGAGAGAGAGCAGGAGCCAGCGGAG[CG]ACCCTCACCTGATGCCTGGGGTTCCTTGGAAGCTAAGATGCCGCGTGTGTGTTTACGGAA	ACACGCGGCATCTTAGCTTCCAAGGAACCCCAGGCATCAGGTGAGGGTCG			TRAPPC9;TRAPPC9	NM_001160372;NM_031466	Body;Body				8:141115889-141116035				0.891529	0.906702	0.0151735	278	575	853
cg17835072	0.176227	2.03914	3.38953	0.00109052	0.999978	-1.34471	chr2	71189456	+	27783365		ACACTTAAATCAACTAAAACACCCTCACTACATATCCTCTAAATAATTTC		II			rs2072460	0.461483	NA	NA	NA	NA	chr2:71192094-71192495	N_Shelf	CGAGCACATTAGGTGTGCTTTGAGCAGTGAAAGGGACAGTGAGAGGAGCAGTGAGAGGGA[CG]AAACCATCCAGAGGACATGCAGTGAGGGTGCTCCAGCTGACCCAAGTGTGGGTGCCCTAG	CACTTGGGTCAGCTGGAGCACCCTCACTGCATGTCCTCTGGATGGTTTCG			ATP6V1B1	NM_001692	Body		CDMR						0.809844	0.791447	0.0183974	389	465	854
cg06973164	-0.235402	3.38862	-3.55225	0.000644601	0.999978	-0.99458	chr11	129903187	+	61735507	49641484	AAAACAAATCTTCTCTAAAAAAAACAAAACCACACAAAACATACCAAACA	AAAACGAATCTTCTCTAAAAAAAACGAAACCGCGCGAAACATACCGAACG	I	A	Red	NA	NA	NA	NA	NA	NA	chr11:129902811-129903119	S_Shore	CCTCTCCCCTCGCTGCGCCGGCGCGGCCGCGCTCCGCCCCGTTCCCTGCAGCCCGCGCGC[CG]CCCGGCATGCCCCGCGCGGCCCCGCCTCCCCCAGAGAAGACTCGTTTTTCCATGTTATTG	AAAACGAGTCTTCTCTGGGGGAGGCGGGGCCGCGCGGGGCATGCCGGGCG									11:129408034-129408416				0.90643	0.920199	0.0137697	227	628	855
cg04071798	0.166616	0.856478	3.27168	0.00158056	0.999978	-1.59135	chr10	134838595	-	58749380		TTACCATAAAACCCRACAAAACAATCCCAAAATAACACTTAACRAAACTC		II			NA	NA	NA	NA	NA	NA	chr10:134834676-134835899	S_Shelf	ACCATCTCCTTTTGCCATGAGACCCGGCAGAGCAGTCCCAGAGTAACACTTGGCGGGGCT[CG]GCTCTGCGGAGATGTGGCCACCGGGCTCCCTCCGCGTCCCTCGAGGCTGTGGCCACTCCC	TGCCATGAGACCCGGCAGAGCAGTCCCAGAGTAACACTTGGCGGGGCTCG								TRUE	10:134688323-134688622				0.651988	0.628447	0.0235408	542	313	855
cg05807849	0.167437	2.5228	3.50404	0.000754432	0.999978	-1.09942	chr11	132946692	-	62690308		AAAAAACTAAATAACTCTCCAACTAATCAACAAACTAATAATAAAACAAC		II			NA	NA	NA	NA	NA	NA		OpenSea	GCGGAAGCTCAGAGAAGCTAAGTGACTCTCCAGCTGGTCAGCAGGCTGGTGATGGAGCAG[CG]TGAAACATGCACCTCCTGACCCCACTAGGAATCTTCTGTATTCCAAAAGACTCATCTCAA	CGCTGCTCCATCACCAGCCTGCTGACCAGCTGGAGAGTCACTTAGCTTCT			OPCML	NM_001012393	Body		CDMR						0.856286	0.841433	0.0148535	270	586	856
cg02280348	0.238585	3.48834	3.65031	0.000466159	0.999978	-0.778457	chr14	22011087	+	36698490		ATTCATTTCTCTTACAATTAAATCAAATCATAAAATCATAAAATTCTAAC		II			NA	NA	NA	NA	NA	NA		OpenSea	TTTTCTAGTTTGTTTTCAGAAATGGAGGTATTGTGGAGGCATTTTCTCTACCTTCTGAAG[CG]TTAGAATCCTATGATCTCATGACTTGATTTAATTGCAAGAGAAATGAACTAGGAATCTAG	TTCATTTCTCTTGCAATTAAATCAAGTCATGAGATCATAGGATTCTAACG								TRUE					0.921453	0.908944	0.0125084	160	698	858
cg18736186	0.163101	0.262762	3.23785	0.00175555	0.999978	-1.66103	chr15	49462118	+	35759369		CATAACCTAACRCCCTACATACACCTAATTTCTAATCTATCTCRAACTAC		II			NA	NA	NA	NA	NA	NA		OpenSea	TAGCTGCTGAACAATAAAGACCAAAACCATAACTAAAAAACAAACAAACAAACAAAAAAA[CG]CAGCCCGAGACAGATCAGAAACTAGGTGTATGTAGGGCGCCAGGTTATGACACTGTTCTC	CGCAGCCCGAGACAGATCAGAAACTAGGTGTATGTAGGGCGCCAGGTTAT			GALK2;GALK2	NM_002044;NM_001001556	TSS1500;Body					15:49462017-49462821	Promoter_Associated	TRUE	0.554823	0.528215	0.0266082	613	245	858
cg19530281	0.153846	-0.324712	3.22928	0.00180269	0.999978	-1.67861	chr8	1113432	+	57675372		CACTAACATCCACAAAATTTACTTCCTACAAAAAAAAATCCCAAAACATC		II			NA	NA	NA	NA	NA	NA	chr8:1113058-1114073	Island	GGGTCCGCGGTTCCGGCTGGAGACGGGCGGCCCCACGCTGGGCGAGGGGAGGCCTGTGTC[CG]ATGCTCTGGGACCCTTCCCTGCAGGAAGCAAACTCTGTGGATGCCAGTGACAATTATTTA	ACTGGCATCCACAGAGTTTGCTTCCTGCAGGGAAGGGTCCCAGAGCATCG									8:1100442-1101830				0.454243	0.426805	0.0274382	628	230	858
cg24044426	0.172171	1.96879	3.34352	0.00126177	0.999978	-1.4417	chr14	93699254	+	32639440		TCRTCCTACATAAATTACCTACRATATACTATAAATAATTTCCAAACCAC		II			NA	NA	NA	NA	NA	NA		OpenSea	TTGAACACGCAGAGCAAAAGCAGGCGAGCACGGGCGGAAGGAGCCGGGAGGCCCTGAGGA[CG]TGGCCTGGAAACTATTCACAGCACACCGCAGGCAATCTATGCAGGACGACCGACGACCGA	CGTGGCCTGGAAACTATTCACAGCACACCGCAGGCAATCTATGCAGGACG									14:92768819-92769067				0.802479	0.782963	0.0195163	435	426	861
cg12613839	-0.182014	-0.827617	-3.20103	0.00196656	0.999978	-1.73631	chr5	178741205	-	34796435		CCTAAAAACACACAAACCRACCAAAACCAAAACCAAAACTAACATTTCCC		II			NA	NA	NA	NA	NA	NA		OpenSea	ATTGGGCGCAGCCTGGGAGCACACAGACCGGCCAGGGCCAGGGCCAGGACTGGCATTTCC[CG]GGCTCCTGGTCCCATCCTGCCCCTCCCACCGGGTCGGCCCTGTCCTTGTCTTGCTCAGCT	CTGGGAGCACACAGACCGGCCAGGGCCAGGGCCAGGACTGGCATTTCCCG			ADAMTS2;ADAMTS2	NM_021599;NM_014244	Body;Body			TRUE	5:178673748-178674049			TRUE	0.35027	0.380597	0.0303267	683	178	861
cg25570453	-0.172682	2.46146	-3.49033	0.00078878	0.999978	-1.12908	chr7	14834316	+	31696385		TCTTTTTCAATTAAATACCTTCATTTTAACTATAAACCTCCTACCAAACC		II			NA	NA	NA	NA	NA	NA		OpenSea	AAAAATCCAAAGCAGAGCATTATCTTGCAACTGGCTGAATTACAAAGCAAGTTGAGCTTT[CG]GTCTGGCAGGAGGTCTACAGTTAAAATGAAGGCATTTAATTGAAAAAGAATGGGATCCTC	CGGTCTGGCAGGAGGTCTACAGTTAAAATGAAGGCATTTAATTGAAAAAG			DGKB;DGKB	NM_145695;NM_004080	Body;Body			TRUE					0.839917	0.854838	0.0149209	279	583	862
cg16877615	-0.211714	0.754613	-3.19805	0.00198464	0.999978	-1.74238	chr13	111973089	-	11638508	65670380	ATTTTCCACATAAAATAAAACTAAAAAACACAAATAACTAAAAAAACCCA	ATTTTCCACGTAAAATAAAACTAAAAAACACAAATAACTAAAAAAACCCG	I	C	Grn	rs11841171	0.156193	NA	NA	NA	NA		OpenSea	TACCTAAAAGGTGTTTTCCACGTGGAGTGGGACTGAGAGGCACAGGTGGCTGAGGGGACC[CG]CCTGGGATGTGAGGCGCAGGTGAGTCGATGAACGCCCCCTCCTGGTGTGAGCCGCCCGCT	CGGGTCCCCTCAGCCACCTGTGCCTCTCAGTCCCACTCCACGTGGAAAAC			C13orf16;C13orf16	NM_152324;NM_152324	1stExon;5'UTR				13:110771050-110771181				0.615476	0.646197	0.030722	694	169	863
cg06384642	-0.204945	-2.47933	-3.40334	0.00104354	0.999978	-1.31541	chr7	99613517	+	55717509	41795351	CTCCCCACCTAATCCTAAAAATAAAACAAAAACATCTCCCAAAAAAAACA	CTCCCCGCCTAATCCTAAAAATAAAACGAAAACGTCTCCCAAAAAAAACG	I	A	Red	NA	NA	NA	NA	NA	NA	chr7:99613104-99613797	Island	CTGTTGTGCGAAGAGAGTCCATGCCCCTGCCTCCTGGCCGGGCCCGGCCGTAGAAAGCGC[CG]TTCTTCCTGGGAGACGTCCCCGCCCCACCCCCAGGATCAGGCGGGGAGGGGGCGAGGGTT	CTCCCCGCCTGATCCTGGGGGTGGGGCGGGGACGTCTCCCAGGAAGAACG			ZKSCAN1	NM_003439	5'UTR				7:99451058-99451773	7:99612594-99614247	Promoter_Associated		0.147346	0.164437	0.0170905	365	499	864
cg05474055	0.254056	-3.85979	3.74401	0.000340318	0.999978	-0.5685	chr11	64611972	-	35694357	56642475	AACCACTACTAAACTCATAATACAACACCAACAACAAATCTAAAAAACCA	AACCGCTACTAAACTCGTAATACAACGCCAACAACAAATCTAAAAAACCG	I	T	Red	NA	NA	NA	NA	NA	NA	chr11:64611714-64612634	Island	CCCGCCGTAGGGGGCCGCTGCTGAGCTCGTGGTGCAGCGCCAGCAGCAGATCTAGGAGGC[CG]TCGAGCCCCGGGCAGCCGCCGGCCTCGCCCCGCGCCAGCTGCTCCAGCGCGCGCAGCCGC	CGGCCTCCTAGATCTGCTGCTGGCGCTGCACCACGAGCTCAGCAGCGGCC			CDC42BPG	NM_017525	1stExon				11:64368183-64369182	11:64610375-64613007	Promoter_Associated		0.0696604	0.0585853	0.0110751	110	756	866
cg00738660	0.204036	2.46039	3.39193	0.00108221	0.999978	-1.33962	chr10	134884271	+	68771403		TCCTTAAACCTCCTAATAAATAACTAAATAACTAACCTATACRAATAAAC		II			NA	NA	NA	NA	NA	NA	chr10:134884426-134884646	N_Shore	ATTTCTGTGCCTGTCTCTCCTCTGGGGCCGCCCACCCGGCTCACATCCTCCGTGGGACTT[CG]CCCATCCGCACAGGCCAGTCACCTAGTCACCTATTAGGAGGCCCAAGGAGCAATTTCAGA	CGCCCATCCGCACAGGCCAGTCACCTAGTCACCTATTAGGAGGCCCAAGG													0.851199	0.833446	0.0177526	385	481	866
cg09106624	-0.332217	-4.47516	-4.22252	6.35653e-05	0.993103	0.551585	chr12	54332501	+	19735346	50715460	CCTCCCTACATTCCCTCTACACATACAAAAACACTTCATTAAAAAATCCA	CCTCCCTACATTCCCTCTACGCATACGAAAACACTTCATTAAAAAATCCG	I	C	Grn	NA	NA	NA	NA	NA	NA	chr12:54332805-54333731	N_Shore	TGCGCAGAGCGGGTCACGTGGGCGCGGGAGGGGTGCTGAGAGGTGGAGAGCGGGAGCCGG[CG]GATTTCTTAATGAAGTGTCTCCGCATGCGTAGAGGGAATGTAGGGAGGGAGGTGGAAGCA	CCTCCCTACATTCCCTCTACGCATGCGGAGACACTTCATTAAGAAATCCG			HOXC13	NM_017410	TSS200				12:52618420-52619998	12:54332022-54332693	Unclassified_Cell_type_specific	TRUE	0.0408644	0.0500037	0.00913924	21	847	868
cg23252919	0.230958	3.11086	3.54224	0.000666083	0.999978	-1.01643	chr11	68701893	-	28759458		AACAAAAACRTACCCRAAACACRTATTAATAATAAATACCCACTTAAAAC		II			NA	NA	NA	NA	NA	NA		OpenSea	TGGCCATGATAGACAGAAACGTGCCCGAAACACGTGTTGGTGGTGGATGCCCACTTGGGG[CG]ACCTTGTGCTGCTCACCCGTTCTTTCTTTCCCTCCAGGCGAAGTCCGCCTCGTCAGTTTG	CGCCCCAAGTGGGCATCCACCACCAACACGTGTTTCGGGCACGTTTCTGT			IGHMBP2	NM_002180	Body				11:68458434-68458911				0.899724	0.886083	0.0136415	233	635	868
cg01185855	-0.323192	-3.30256	-3.4494	0.000900297	0.999978	-1.21714	chr3	9975508	-	29687508	44670463	TAAACAACAAACTCCACCCCCTAAACTACAACACAAATAAAAATTATACA	TAAACGACAAACTCCGCCCCCTAAACTACGACGCGAATAAAAATTATACG	I	T	Red	NA	NA	NA	NA	NA	NA	chr3:9974379-9975722	Island	GTCGCCATTGGCTGGGCGGCAAGCTCCGCCCCCTGGACTGCGGCGCGGGTGGGGGTTGTG[CG]TTTTACGCAGGCTGTGGCAGCGACGCGGTGAGGAGACGGCCCACGGCGCCCGCGGGCTGG	CGCACAACCCCCACCCGCGCCGCAGTCCAGGGGGCGGAGCTTGCCGCCCA			CRELD1;CRELD1;CRELD1;CRELD1;CRELD1;CRELD1	NM_001077415;NM_001031717;NM_015513;NM_015513;NM_001077415;NM_001031717	1stExon;5'UTR;1stExon;5'UTR;5'UTR;1stExon	high-CpG:9950474-9950541			3:9949380-9950722	3:9974268-9976243	Promoter_Associated		0.0891795	0.105097	0.0159176	324	544	868
cg11150353	-0.206867	1.38441	-3.19556	0.00199985	0.999978	-1.74744	chr1	9308197	+	33785509		AAACTAAAAAAACAATAACCTCRAATACTCCCRCTACAACTACAAAAAAC		II			NA	NA	NA	NA	NA	NA		OpenSea	GCCTGGCGCCGCTGCGCTGTGCTGCCAGCGCTGCGTCAGTGGCCAGCTCATCCCCGCGGC[CG]CTTTCTGCAGCTGCAGCGGGAGCACCCGAGGCCACTGCCCCCCCAGCCCCCGCAGTGCGT	GGCTGGGGGGGCAGTGGCCTCGGGTGCTCCCGCTGCAGCTGCAGAAAGCG			H6PD	NM_004285	Body				1:9229636-9230785				0.710014	0.74092	0.0309059	701	167	868
cg06532176	0.178617	-3.46016	4.15654	8.06518e-05	0.993103	0.392721	chr16	78133804	-	66646483		CCAAAAACRACTAAATTTACTACRCCAAATAAAAAAACCRCAATAAAACC		II			NA	NA	NA	NA	NA	NA	chr16:78133174-78134066	Island	GGAGAGAACCACCAAGGACGGCTGGGTTTACTACGCCAAGTAAGGGGGCCGCAGTGGGGC[CG]CGGACGCACCTGGGACCCTGCACAGCCCACGGACGCCACCTGCGCGGGGAGGACGCGCAC	CGGCCCCACTGCGGCCCCCTTACTTGGCGTAGTAAACCCAGCCGTCCTTG		TRUE	WWOX;WWOX;WWOX;WWOX	NM_016373;NM_130791;NM_130844;NM_130844	Body;Body;1stExon;3'UTR				16:76690676-76691567	16:78132751-78134701	Promoter_Associated		0.0872465	0.0778678	0.00937872	31	838	869
cg06329093	-0.192471	-3.0834	-3.65235	0.000462996	0.999978	-0.773916	chr16	67449835	+	28603508		TCTTTACCAAACTCTATACCAAACRTAAACACAAAAAACTCCCAACAAAC		II			rs147832640	0.0147	NA	NA	NA	NA	chr16:67449936-67450472	N_Shore	ATGTATGACATCCGCTTCCCAGCCCCCTTCCTTAATGCTCTGGGTTCTGGAGACAGACCA[CG]TCTGTTGGGAGTCCTCTGTGCCCACGCCTGGCACAGAGCCTGGCAAAGAGTAAGCGCTCA	CTTTGCCAGGCTCTGTGCCAGGCGTGGGCACAGAGGACTCCCAACAGACG			ZDHHC1	NM_013304	5'UTR					16:67449803-67450793	Unclassified		0.102047	0.114241	0.0121939	159	710	869
cg24457538	0.255371	3.42285	3.59962	0.000551552	0.999978	-0.890647	chr10	88414321	+	33744477	35673470	AAAACTAACAATTACTCTATATCTAATAAAACACAAATAAATAAATATCA	AAAACTAACGATTACTCTATATCTAATAAAACGCAAATAAATAAATATCG	I	C	Grn	NA	NA	NA	NA	NA	NA		OpenSea	GCTCCCACATCGCTATATAAAGATGGGGATGAACTCTGTGGCTGTGAGTCACCATAACTG[CG]ACACTCACTCATTTGCGCTTCACCAGACACAGAGCAACCGCCAGCCCCAAGAGCAGCTCC	GGGGCTGGCGGTTGCTCTGTGTCTGGTGAAGCGCAAATGAGTGAGTGTCG			OPN4;OPN4;OPN4;OPN4	NM_033282;NM_001030015;NM_033282;NM_001030015	1stExon;1stExon;5'UTR;5'UTR								0.917837	0.904955	0.0128827	192	678	870
cg26819753	-0.265653	-3.44484	-3.59479	0.000560421	0.999978	-0.901284	chr6	33265313	-	41694354	50673308	AACAACTAAAAATAACTAAAACCTCAATCCAAACACTACCACATACCCCA	AACGACTAAAAATAACTAAAACCTCAATCCAAACACTACCGCATACCCCG	I	C	Grn	NA	NA	NA	NA	NA	NA	chr6:33266302-33267582	N_Shore	CAAGCCAGAGGCAGCGACTAGGGGTAGCTGAAACCTCAGTCCAGGCACTGCCGCATGCCC[CG]CCCCTCCCGGCCAAGGACTATACCAGCCCAGAGAATTAGTCTTTTTCAGGACCCCTTTCA	AGCGACTAGGGGTAGCTGAAACCTCAGTCCAGGCACTGCCGCATGCCCCG			RGL2;RGL2	NR_028387;NM_004761	Body;Body					6:33265294-33265530	Unclassified_Cell_type_specific		0.0810939	0.0940111	0.0129173	196	674	870
cg09544279	-0.185702	-1.77443	-3.30128	0.00144102	0.999978	-1.52997	chr5	179921349	-	55747446	66659363	ATAATTATACCCAACAACAACACCCAATAAACAACCAAAATATTAAAACA	ATAATTATACCCGACGACGACGCCCAATAAACGACCAAAATATTAAAACG	I	C	Grn	NA	NA	NA	NA	NA	NA	chr5:179921201-179922179	Island	ACCGAAGGGCGGATGGTTGTGCCCGGCGACGGCGCCCAATGAGCGGCCAGGATGTTGGAG[CG]CCGGCGGCGGTCCGGGCGCTCGCTGGCTGAGGGACGGCGGCCGCCGCCATGATGCTTGTT	ATGGTTGTGCCCGGCGACGGCGCCCAATGAGCGGCCAGGATGTTGGAGCG			CNOT6	NM_015455	TSS200	high-CpG:179853955-179854099			5:179853729-179854807	5:179920929-179922803	Promoter_Associated		0.219795	0.241133	0.0213385	495	377	872
cg02228688	0.200183	2.90447	3.45195	0.000892941	0.999978	-1.21168	chr7	75951057	+	17785334		AACATTTTACTCCCAATATTCATATTTCTCCTTACAAAAAAAACATTCTC		II			NA	NA	NA	NA	NA	NA	chr7:75947393-75947910	S_Shelf	ATCCGCCCGCCTCGGCCTCCCAAAGTGGTGGGATTACAGGCGTGAGCCACTGCGCCTGGC[CG]AGAATGTCCTTTTTGTAAGGAGAAATATGAACATTGGGAGTAAAATGCCAACAGTGACTT	GCATTTTACTCCCAATGTTCATATTTCTCCTTACAAAAAGGACATTCTCG													0.886603	0.870903	0.0157002	320	554	874
cg23925201	-0.16062	1.11143	-3.24741	0.00170433	0.999978	-1.64139	chr2	130001008	+	51627477		ATTATAACATATTACTAAACCCAACACCACTATAATATAACTCTCCTCTC		II			NA	NA	NA	NA	NA	NA		OpenSea	TAACCTAGGGGCTAGGTCCAGTTATATGTCACAATTACCCCAGTGGGCTGGCCCCAGGCA[CG]AGAGGAGAGTCACATCACAGTGGTGCTGGGCCCAGCAATATGTCACAATCCCCACTGTGG	TTGTGACATATTGCTGGGCCCAGCACCACTGTGATGTGACTCTCCTCTCG										2:130000830-130001032	Unclassified_Cell_type_specific		0.673665	0.698625	0.0249595	593	282	875
cg08239565	0.233059	4.01533	4.15992	7.96778e-05	0.993103	0.40083	chr19	54290996	-	27634300		AAACACTTTCTACTCTCTAATAAAAATACCRCCATCTTTTAAATATTACC		II			NA	NA	NA	NA	NA	NA		OpenSea	TCAAACTGTGGGGGCACTTTCTGCTCTCTGGTGAAAGTGCCGCCATCTTTTGAGTGTTAC[CG]CTTGAGAAGACTCAACCTGCGGAGAAGATACCATTTTGATTGGGTGAGGGGGCGGGTAGC	GGCACTTTCTGCTCTCTGGTGAAAGTGCCGCCATCTTTTGAGTGTTACCG			MIR372;MIR373	NR_029865;NR_029866	TSS200;TSS1500				19:58982710-58983058				0.944294	0.935231	0.00906343	28	849	877
cg12524338	0.233517	3.11381	3.43685	0.000937356	0.999978	-1.244	chr4	183729343	+	74663334		CCTAAATAATAACRAAACRAATCCTATTACCCTTTAATTTACAAAAACCC		II			NA	NA	NA	NA	NA	NA	chr4:183729059-183729344	Island	TTCCGAGGCGGCTGCCTGCCGGTTCCTCTCGCGCCTGTTACACGGCGGACGGCAGGCTCC[CG]GGCTCTTGTAAATCAAAGGGCAACAGGACTCGCCTCGCCACCACTCAGGCTCTTTCTGCG	CGGGCTCTTGTAAATCAAAGGGCAACAGGACTCGCCTCGCCACCACTCAG									4:183965959-183966972				0.900589	0.884673	0.0159164	333	545	878
cg24879426	-0.235112	-2.85677	-3.42612	0.000970196	0.999978	-1.26692	chr3	49449864	-	34630450	61789431	TAAAAACTACAATAACAATACCCCAAATAAAACAAAAACCAATCATAACA	TAAAAACTACGATAACAATACCCCGAATAAAACGAAAACCAATCATAACG	I	A	Red	NA	NA	NA	NA	NA	NA	chr3:49448861-49449965	Island	ACGCGTGCGTGGTGGGGACTACGGTGACAGTACCCCGGGTGGGGCGAGGGCCAGTCATGG[CG]GAGTCCTGGTCTGGGCAGGCCTTGCAGGCTCTGCCGGCCACGGTGCTGGGCGCGCTGGGC	CGCCATGACTGGCCCTCGCCCCACCCGGGGTACTGTCACCGTAGTCCCCA			RHOA;TCTA	NM_001664;NM_022171	TSS1500;1stExon		RDMR		3:49423875-49425117	3:49448823-49449965	Promoter_Associated		0.117255	0.133254	0.0159991	341	538	879
cg14173442	-0.245243	2.77965	-3.33493	0.00129642	0.999978	-1.45971	chr13	24008109	-	42802336		CTCTATTAAACACCAATTATATAACCTTAAACAAATCACTCATAAATCTC		II			NA	NA	NA	NA	NA	NA		OpenSea	CAGAAGACTGGCTCTATTAAACACCAGTTGTGTGACCTTAGACAAGTCACTCATGGGTCT[CG]AGTACCTCATGGGAAATGAAGACCTGTGACCTGGTAATGTTGTAGCTCACAATCTGCTTT	CGAGACCCATGAGTGACTTGTCTAAGGTCACACAACTGGTGTTTAATAGA			SACS	NM_014363	TSS1500								0.863731	0.882935	0.0192039	445	434	879
cg10887385	-0.280672	2.53819	-3.28573	0.00151283	0.999978	-1.56227	chr1	107688142	-	69645422		AATTATATTAAATAACAACTTAATATCCCTCTACTCCTAATCTATAATAC		II			rs114105698	0.024327	NA	NA	NA	NA	chr1:107682889-107684463	S_Shelf	TGAAATCAAATAATTATGTTAAATAACAGCTTAGTGTCCCTCTGCTCCTGATCTGTAATA[CG]CCGTGGTCAATATCTTTTTCTGTGTCAATGGGAGCTCATTAAATGTAAACTCTGCAGACT	ATTATGTTAAATAACAGCTTAGTGTCCCTCTGCTCCTGATCTGTAATACG			NTNG1;NTNG1;NTNG1	NM_014917;NM_001113226;NM_001113228	5'UTR;5'UTR;5'UTR								0.84215	0.864182	0.022032	519	360	879
cg00797058	0.232465	2.14052	3.25602	0.00165943	0.999978	-1.62367	chr10	8137978	+	59800458		AATTAAACATAATCTATTTAAAAAAACCRTAAAAAAACCAAATATCCCTC		II			NA	NA	NA	NA	NA	NA		OpenSea	TGACTCTCCCGAGAGACAGGAAAATCTGTCCCATTGTTTGTGCGCCCCTCTGCTCCTCTG[CG]AGGGATATCTGGCTTCTTTACGGCTCCTCTAAATAGACCATGTTTAATCATCACTGTCAG	ATTAAACATGGTCTATTTAGAGGAGCCGTAAAGAAGCCAGATATCCCTCG									10:8177906-8178065				0.821468	0.797928	0.0235406	566	314	880
cg23916979	0.183626	2.58671	3.45417	0.000886577	0.999978	-1.20692	chr12	132657517	-	20611393		AACAAAACTAACRAAATTTACTACAACAACCACCATAAATAAAAAAAACC		II			NA	NA	NA	NA	NA	NA		OpenSea	TGTGCATCAAAGGCAGAGCTGACGGAATTTGCTGCAGCAGCCACCATGGGTGGAAAGAGC[CG]CCAAGGCTGAACCCGACGCCCTGGTGTGATCACTTGTGGGGACAAAGTGGTCGCTAATGG	CGGCTCTTTCCACCCATGGTGGCTGCTGCAGCAAATTCCGTCAGCTCTGC									12:131223250-131223524	12:132657154-132658198	Unclassified_Cell_type_specific		0.861808	0.846307	0.0155007	319	562	881
cg26955850	0.19369	0.091236	3.18273	0.00208003	0.999978	-1.77349	chr20	3052345	+	10655421		CCCTCTTACCTCCCAAAAAACAATTCTAAATATAACAAACRAAAATCAAC		II			NA	NA	NA	NA	NA	NA	chr20:3052097-3053103	Island	CCCAGCGCACCCGCACCATGGCCGGCCCCAGCCTCGCTTGCTGTCTGCTCGGCCTCCTGG[CG]CTGACCTCCGCCTGCTACATCCAGAACTGCCCCCTGGGAGGCAAGAGGGCCGCGCCGGAC	CCTCTTGCCTCCCAGGGGGCAGTTCTGGATGTAGCAGGCGGAGGTCAGCG		TRUE	OXT	NM_000915	1stExon				20:3000147-3001103	20:3052273-3053455	Unclassified_Cell_type_specific		0.527353	0.495261	0.0320919	733	149	882
cg09166519	-0.297286	-3.85801	-3.5638	0.000620614	0.999978	-0.969302	chr12	103344414	+	67788396	65765322	CAACTAAAACAAAAAATACAAACACCTAAAACCTTAAAACTCCTAAAACA	CGACTAAAACGAAAAATACAAACGCCTAAAACCTTAAAACTCCTAAAACG	I	T	Red	NA	NA	NA	NA	NA	NA	chr12:103344398-103344640	Island	ACACACGACTGACCTCAGTCACTTCGGTAAACTGCCCTTGCTTTCCGGAGGCGGCAGGAA[CG]TTTCAGGAGCTCCAAGGCTCTAGGCGCCTGCATTCCTCGCCCCAGCCGGTAGTCTCCTAG	CGGCTGGGGCGAGGAATGCAGGCGCCTAGAGCCTTGGAGCTCCTGAAACG								TRUE	12:101868372-101869201				0.0615762	0.0745761	0.013	214	669	883
cg22775636	0.210782	2.28403	3.34076	0.00127283	0.999978	-1.4475	chr4	85139232	-	40753492		TAATTTTCAATAAATAAAAACTACCCTTTCAACCAATTTATAATATCTCC		II			NA	NA	NA	NA	NA	NA		OpenSea	CCAAGAAAATCTAGTTTTCAATGAATAAAGGCTACCCTTTCAACCAATTTGTGGTGTCTC[CG]GAGCAAGGAATTGTGTCGATCGTCACCACAAAAATGCACAGGCAGAGGGCAGACAGGCAG	AGTTTTCAATGAATAAAGGCTACCCTTTCAACCAATTTGTGGTGTCTCCG								TRUE					0.834707	0.81604	0.0186673	438	449	887
cg19471655	0.2306	-3.33346	3.59325	0.000563269	0.999978	-0.904664	chr19	51487109	+	60636432		CCAACTATATACCAACCCAAATCRAAACTTAAATCACATCAAATCCTCTC		II			NA	NA	NA	NA	NA	NA		OpenSea	TTGGAGCCAGCATCACCCTCTCCCCTACAGGTGCACCCTTGATGAAGCCTCTTCTCACCT[CG]AGAGGATCTGATGTGATCCAAGTTCCGACTTGGGCTGGCACACAGCTGGGCTCCAAAATC	CAGCTGTGTGCCAGCCCAAGTCGGAACTTGGATCACATCAGATCCTCTCG			KLK7;KLK7;KLK7	NM_005046;NM_005046;NM_139277	5'UTR;1stExon;TSS200								0.0961537	0.0835399	0.0126138	197	692	889
cg13853141	0.150834	0.544362	3.22116	0.00184846	0.999978	-1.69524	chr2	98329942	+	22634477		ATTTACATCAAAATCACAAAATACTATACTCAAAAAAAATCACAAACCAC		II			NA	NA	NA	NA	NA	NA		OpenSea	CATCCTGCAGCTGGGCAGGCAGTGCTGGGCCCCGGAAATGCCCTCTGCCTCCCTGGAGCA[CG]TGGCCTGTGATTTTCCTTGAGCACAGCACTTTGTGACTTTGATGTAAACATCAAACACAG	CGTGGCCTGTGATTTTCCTTGAGCACAGCACTTTGTGACTTTGATGTAAA			ZAP70	NM_001079	TSS200					2:98329743-98330828	Promoter_Associated_Cell_type_specific		0.602362	0.576013	0.026349	639	250	889
cg16265599	0.238247	0.570856	3.13942	0.00237347	0.999978	-1.8609	chr17	40936658	+	48638386		ATATCTAACCTATTTTCRTACAAACAAAAAACATTAACTACRAACTAACC		II			NA	NA	NA	NA	NA	NA	chr17:40936445-40936668	Island	GTGAGAGGGATGGGGCTGGCGGGAAAGGCAATTCCAGGGCCACTTCCCCTTTTCCTGCGC[CG]GCCAGCCCGCAGTCAATGCCCTTTGCCTGCACGAAAACAGGCTAGACACAGAGTCGCCTT	TGTCTAGCCTGTTTTCGTGCAGGCAAAGGGCATTGACTGCGGGCTGGCCG			WNK4	NM_032387	Body				17:38189972-38190294				0.611328	0.570305	0.0410232	831	60	891
cg01410440	-0.275306	3.60325	-3.51024	0.000739385	0.999978	-1.086	chr7	157193063	-	59693334	17602324	ATCTAAACATAAAAAATACCTAAATCCCCACACCTTCATAAACACACTCA	ATCTAAACATAAAAAATACCTAAATCCCCGCGCCTTCATAAACACGCTCG	I	T	Red	NA	NA	NA	NA	NA	NA	chr7:157192920-157193155	Island	GTACGTAGGGAGGTCTGAGCATGGGGGATGCCTGGGTCCCCGCGCCTTCATGGACACGCT[CG]TGTGTGGTGTGCCGTGATGCTTGCTGTGCAGCAGGCCGGCTGGTGGAGAGCTTTCGCTGG	CGAGCGTGTCCATGAAGGCGCGGGGACCCAGGCATCCCCCATGCTCAGAC			DNAJB6	NM_058246	Body				7:156885702-156886170				0.91723	0.930947	0.0137167	263	630	893
cg18680788	0.310132	-3.09334	3.30338	0.00143154	0.999978	-1.52559	chr5	172754896	+	22626498	25760340	AAAACCACACAAACTCTTAAAATAACACAAAACATACAAAAAAAAACACA	AAAACCACGCAAACTCTTAAAATAACACGAAACGTACAAAAAAAAACGCG	I	A	Red	NA	NA	NA	NA	NA	NA	chr5:172754056-172757098	Island	ACCCTGCTAGCACGTGCAGATTCCGGGCCCTCGGAGCCCGGCGCGGACCTCGCCTTGCCT[CG]CGCTTCCCTTTGCACGTCCCGTGCCATCCCAAGAGTTTGCGTGGCCCTGGGTGGGCGCCT	CGCGCTTCCCTTTGCACGTCCCGTGCCATCCCAAGAGTTTGCGTGGCCCT			STC2	NM_003714	Body		DMR		5:172686584-172689856	5:172754357-172756346	Unclassified		0.115328	0.0950947	0.0202333	489	404	893
cg22584911	-0.287208	3.27448	-3.46999	0.000842458	0.999978	-1.17293	chr15	52176689	+	46738501		TTTACAAAAAATTCTACCCTACAAATTTTTCCTCTAATCTATAACCCAAC		II			NA	NA	NA	NA	NA	NA		OpenSea	ACACTATAGTTGCCCATTGAACAACCATTCACAGATGCTTGCTTTCCTAGCCACCCTTGC[CG]CTGGGCCATAGACCAGAGGAAAAATCTGCAGGGCAGAATTTCTTGTAAAAGTTGACAATT	TTACAAGAAATTCTGCCCTGCAGATTTTTCCTCTGGTCTATGGCCCAGCG			TMOD3	NM_014547	Body			TRUE					0.898818	0.913378	0.01456	298	596	894
cg26686068	0.175606	1.81149	3.31619	0.00137518	0.999978	-1.4989	chr4	7700686	+	22674440	38790491	AAACACATCTCACTACATCCCTAACAACCTAAACACAATAAAAAACCACA	AAACGCATCTCACTACATCCCTAACAACCTAAACACGATAAAAAACCACG	I	A	Red	rs6845903	0.4191	NA	NA	NA	NA		OpenSea	AGGCAGGGGCAGAGTGGGACAGAGGCAGGGAGGGCAGGGTGGTGAGCCCAGGACGGTCTC[CG]TGGCTTCCTATCGTGCCCAGGTTGCCAGGGATGCAGTGAGATGCGTCTGAGAGAGAACTC	AGACGCATCTCACTGCATCCCTGGCAACCTGGGCACGATAGGAAGCCACG			SORCS2	NM_020777	Body			TRUE		4:7699880-7701009	Unclassified	TRUE	0.784217	0.764533	0.0196842	470	424	894
cg25720885	-0.158564	0.23811	-3.20405	0.00194842	0.999978	-1.73017	chr12	42850523	+	20624374		ACCTATAATTACCRACTTAATCTATTCTCACATTACTACAAAAAACTACC		II			NA	NA	NA	NA	NA	NA		OpenSea	CTCCCCAGCCATGTGGAATTGGGTCAGTTAAACCTCTTTCCTTTATAAATTACCCAGTCT[CG]GCAGTTCTTTGTAGTAATGTGAGAATAGACTAAGTCGGCAACTATAGGCTTTATTTTCTT	CGGCAGTTCTTTGTAGTAATGTGAGAATAGACTAAGTCGGCAACTATAGG													0.53069	0.558797	0.0281066	675	219	894
cg13613346	0.464186	2.93148	3.12899	0.00244967	0.999978	-1.88182	chr6	31855008	+	32626421		TAATACCTTTAACTCCTTATTCTAATAAATACTATAATAAAAACAAACTC		II			NA	NA	NA	NA	NA	NA	chr6:31856896-31857104	N_Shore	CTTCTTTCAGGAAGGCTTCTCAGGGCCCCAAGCTGGATCAGGGCCCCTCCTGGCATTCTC[CG]AGCTTGCCTCCACCACAGCATTTATCAGAATAAGGAGTCAAAGGCATCAGCTCTGCCTGA	GATGCCTTTGACTCCTTATTCTGATAAATGCTGTGGTGGAGGCAAGCTCG			EHMT2;EHMT2	NM_006709;NM_025256	Body;Body								0.891429	0.847073	0.0443563	852	43	895
cg19716930	-0.194472	-0.402026	-3.16328	0.00220735	0.999978	-1.81285	chr17	79826898	+	48790501		ACAAAACTAACTACATAATAAACAACTATAAACCCCRAACCRAAAAATAC		II			NA	NA	NA	NA	NA	NA	chr17:79826700-79827675	Island	TGCTGTAGCTGCCCCGGGCCAGCATACCCTTGGGTGCCTCCTCCACGGGGGTCAGGAACT[CG]TACTCCTCGGCCCGGGGCCCATAGCTGCCTACCATGTAGTCAGTCTTGTCAACTGCGGCA	CAAGACTGACTACATGGTAGGCAGCTATGGGCCCCGGGCCGAGGAGTACG			ARHGDIA	NM_004309	Body			TRUE	17:77419555-77423406				0.419207	0.452994	0.0337874	768	129	897
cg15776446	-0.293479	-4.14951	-3.70627	0.000386527	0.999978	-0.653472	chr2	179058736	-	43802463	62714349	CTCAAAAAAACACCCAAAAACATAAATTTAACAACCCCAAACAAAAACCA	CTCAAAAAAACGCCCAAAAACATAAATTTAACAACCCCGAACGAAAACCG	I	C	Grn	rs12693155	0.410391	NA	NA	NA	NA	chr2:179058611-179060144	Island	TGAAATGACGACCTCAGAAGGGCGCCCAGGGACATGGGTTTGGCAGCCCCGAGCGGAGGC[CG]CCAGGCAGCCGTTCCTTTCGGAATTCGGTCTCCCGCAGTGCTCCCGGCTGCGGCGCTCCT	CGGCCTCCGCTCGGGGCTGCCAAACCCATGTCCCTGGGCGCCCTTCTGAG	TRUE		OSBPL6	NM_032523	TSS1500				2:178766706-178768390				0.0508336	0.0617715	0.010938	133	766	899
cg15699693	0.325171	3.39678	3.34459	0.00125752	0.999978	-1.43946	chr5	150054944	-	66644424		ACTCTAATTCCTTTTAAACTACTATATAATTTTCTTTTTCTTTTTTTTTC		II			NA	NA	NA	NA	NA	NA	chr5:150051116-150052107	S_Shelf	TAATACGTAGAGCTCTAGTTCCTTTTAAGCTGCTGTATAGTTTTCTTTTTCTTTTTTTTT[CG]CGGGGTGGAGCAGAGTTTTGCTTTTGTGGCCCAGGCTGCAGTGCAATGACACAATCTCAG	CTCTAGTTCCTTTTAAGCTGCTGTATAGTTTTCTTTTTCTTTTTTTTTCG			MYOZ3;MYOZ3	NM_133371;NM_001122853	Body;Body								0.917088	0.898709	0.0183792	433	466	899
cg13627258	0.122518	0.203968	3.30235	0.0014362	0.999978	-1.52774	chr4	3770608	+	24677340		CTCAAAACTACTCTCAATCTTAAACTAAAAAAACCCCACCTCTTTCCACC		II			NA	NA	NA	NA	NA	NA	chr4:3767072-3769789	S_Shore	GTCTTCCCTGCATTCCCATCCCTGCCCCCTGCCCTTCCCCACTCTGATATTCAGGGCCTC[CG]GTGGAAAGAGGTGGGGCTCTTCCAGTCCAAGACTGAGAGTAGCTTTGAGCTAGTCCTCCT	TCAAAGCTACTCTCAGTCTTGGACTGGAAGAGCCCCACCTCTTTCCACCG										4:3770506-3770649	Unclassified_Cell_type_specific		0.542529	0.522366	0.0201633	493	409	902
cg19102858	-0.193381	-3.62638	-4.03994	0.000122213	0.999978	0.115275	chr2	237993901	+	74787353		TTTTTCCTTTCCTAAAACRTAAAACAAATCTAATTACTCTTCTACACAAC		II			NA	NA	NA	NA	NA	NA	chr2:237994004-237994876	N_Shore	GAGGGGAGCTGAGAATTAGATGTAAATTCTGAGGGATGGGAAGGGCCCTAGATTTTAGGG[CG]TTGTGCAGAAGAGTAACCAGATCTGCTCTACGTTTCAGGAAAGGAAAAAAAAATTCCCTC	TTTTCCTTTCCTGAAACGTAGAGCAGATCTGGTTACTCTTCTGCACAACG		TRUE	COPS8;COPS8	NM_198189;NM_006710	TSS200;TSS200					2:237993660-237995483	Promoter_Associated		0.0722953	0.0812259	0.00893064	48	857	905
cg20727052	0.221814	3.3016	3.65888	0.000453018	0.999978	-0.759381	chr4	107224533	-	35603356		TAAACCCTTTTTTCTTTTTTTTCCATTAAAAATCCTTTTTAAAAATCTAC		II			NA	NA	NA	NA	NA	NA		OpenSea	ACCAGTGCTTTTAAGCCCTTTTTTCTTTTTTTTCCATTAGGAATCCTTTTTGAAAATCTG[CG]AAAAACTATGCATTTTCATTATTCAGCAAACACATGTGTACATATGTATATACACATACA	CGCAGATTTTCAAAAAGGATTCCTAATGGAAAAAAAAGAAAAAAGGGCTT			TBCK;TBCK;TBCK;TBCK	NM_033115;NM_001163437;NM_001163435;NM_001163436	Body;Body;Body;Body			TRUE					0.910804	0.899568	0.0112362	155	750	905
cg13151171	0.212006	-0.215789	3.14469	0.00233579	0.999978	-1.8503	chr3	69915189	-	71703505		AAATAAACTTCCCRAAATACTTACCTAACTACTAAACTACCTCCCTAACC		II			NA	NA	NA	NA	NA	NA		OpenSea	TGGGTAAGGCTAAATAAGCTTCCCGAGGTGCTTGCCTGGCTGCTGGGCTGCCTCCCTGGC[CG]TGCCTGGGTCCTTGAGTAGCCCTCATTGTGGTGTGAGGCAGCGTTTTTGTCCTGCAGGTA	CGGCCAGGGAGGCAGCCCAGCAGCCAGGCAAGCACCTCGGGAAGCTTATT			MITF;MITF;MITF	NM_198159;NM_006722;NM_198177	Body;Body;TSS1500								0.477104	0.438568	0.0385359	816	89	905
cg19407955	0.362626	-2.29358	3.19942	0.00197634	0.999978	-1.7396	chr1	165599744	+	55665450	17659395	AAAATCTCTACCTTCACAACCCAAACCTTTAATATAAACACCTACTCCCA	AAAATCTCTACCTTCGCGACCCAAACCTTTAATATAAACACCTACTCCCG	I	T	Red	rs10800118	0.49459	NA	NA	NA	NA	chr1:165599563-165600574	Island	GCCCCCACCCCTCCTCCACCCGGCCTCGAGCCCCGCCCCGGACGCTGGACCCGAGCGTAA[CG]GGAGCAGGTGTTCACATCAAAGGTCTGGGTCGCGAAGGCAGAGACTCCATGTGCCGCAAA	CGGGAGCAGGTGTTCACATCAAAGGTCTGGGTCGCGAAGGCAGAGACTCC			MGST3	NM_004528	TSS1500				1:163866227-163866552	1:165599652-165601505	Promoter_Associated		0.185173	0.157062	0.0281112	690	217	907
cg27550918	-0.216543	3.29994	-3.5709	0.000606303	0.999978	-0.95375	chr10	75410777	+	68638427		TTTAAAAAACRTAAAAAATAACTCAAACTAATCCTACTCCAACCAACACC		II			NA	NA	NA	NA	NA	NA	chr10:75407413-75407706	S_Shelf	AGCTGGCTTGGCTGAGGGGCTCTTGGCTGATGGGCTCAAAGGTCTCCATGCTGAGAAAGG[CG]GTGTTGGCTGGAGCAGGACCAGCTTGAGCCACCCCCCACGCCTTTTAAAGCCCCTTTGTC	TTAAAAGGCGTGGGGGGTGGCTCAAGCTGGTCCTGCTCCAGCCAACACCG		TRUE	SYNPO2L;SYNPO2L;SYNPO2L	NM_024875;NM_024875;NM_001114133	1stExon;5'UTR;Body								0.90208	0.914536	0.0124563	210	701	911
cg15244223	-0.296166	-4.46128	-4.36654	3.75366e-05	0.993103	0.902848	chr6	118228493	+	72801480	20666413	AAAAATCCTAATTTCTCCTTATTTCCTCATACCCAAATCTCCTCAAAACA	AAAAATCCTAATTTCTCCTTATTTCCTCGTACCCGAATCTCCTCGAAACG	I	C	Grn	rs2788996	0.468795	NA	NA	NA	NA	chr6:118228042-118229811	Island	GGTAGCTTTCCGACCGAGCGGGGCACAGGCTGAGGCGGCGCCAGCACAACTGCCGCCGCG[CG]CCCCGAGGAGACCCGGGCACGAGGAAACAAGGAGAAATCAGGACTCCTTCCCCGGAACCG	AGGAGTCCTGATTTCTCCTTGTTTCCTCGTGCCCGGGTCTCCTCGGGGCG			SLC35F1	NM_001029858	TSS200		DMR		6:118334736-118336530			TRUE	0.041491	0.0492929	0.00780187	11	903	914
cg05063999	0.298818	-4.10216	3.78752	0.000293585	0.999978	-0.469897	chr3	64253605	-	74743412	73604450	TATAAAAAAACCACTTACCCAACTTAACCTTACATTACTCCAACACTACA	TATAAAAAAACCACTTACCCGACTTAACCTTACATTACTCCGACGCTACG	I	A	Red	rs114852521	0.018679	NA	NA	NA	NA	chr3:64253533-64253819	Island	GTGCTCCCCGGCTATGGGGGGGCCACTTACCCGGCTTAGCCTTGCATTGCTCCGACGCTG[CG]GCGCCTCTGCCGGCCCGGGAAACTGCGGGGGAGCCGGGGAAAGGGGGTTGGAGACCCAGG	TATGGGGGGGCCACTTACCCGGCTTAGCCTTGCATTGCTCCGACGCTGCG									3:64228574-64228770			TRUE	0.059961	0.0501174	0.00984367	96	818	914
cg02972793	-0.275593	3.89275	-3.55521	0.000638378	0.999978	-0.988114	chr2	3322136	-	12726417	56717349	AAACAAAACACCCAACAAATAATAAAACAAAACACCATAAAAAACCATCA	AAACAAAACACCCGACAAATAATAAAACAAAACGCCGTAAAAAACCGTCG	I	T	Red	NA	NA	NA	NA	NA	NA	chr2:3321063-3321293	S_Shore	AGGAAGGGCCATAAACAAAGCACCCGGCAAATGATAGAGCAGGACGCCGTGAGGAGCCGT[CG]TGGGCTGCTCCAGGGACCAAGTCTTATTTCACATCTTCATTAGTGATCTGGAAGGAGCCA	AAACAAAGCACCCGGCAAATGATAGAGCAGGACGCCGTGAGGAGCCGTCG			TSSC1	NM_003310	Body				2:3301066-3301144				0.930812	0.943362	0.0125494	223	693	916
cg12035503	0.199492	3.58863	3.83561	0.000249077	0.999978	-0.360139	chr8	1853599	+	19781462		AATAACTTTTCCAAACTAAACRCTTTACRAAAATCRTTCCTATATTCCCC		II			NA	NA	NA	NA	NA	NA		OpenSea	GCGGGAGGGCCAACTGCGGTGAAAGTCTGTGAGGAAGGAGGCGGATGTTCAGCGCAGTCA[CG]GGGAACATAGGAACGATTTCCGTAAAGCGCTCAGTTTGGAAAAGTCACCCTGAGACTCCA	CGGGGAACATAGGAACGATTTCCGTAAAGCGCTCAGTTTGGAAAAGTCAC			ARHGEF10	NM_014629	Body				8:1840962-1841099				0.925928	0.91648	0.00944888	84	837	921
cg12406703	-0.270539	-2.25321	-3.20217	0.00195966	0.999978	-1.73398	chr10	112258680	-	12693351		ACTAATCTAACRAAATCAACAAATCRCRATCCACTCTCCCTTAATATAAC		II			NA	NA	NA	NA	NA	NA	chr10:112257163-112258684	Island	CTTCCTGATAGACTGATCTGGCGGGATCAGCAGGTCGCGATCCACTCTCCCTTGGTGTGG[CG]CCGTGGTGCCCCCCTTCCTCCCGCCTAGCCAGCTGTGGTCTTCACCGACCCCCTTGCCTT	CTGATCTGGCGGGATCAGCAGGTCGCGATCCACTCTCCCTTGGTGTGGCG			DUSP5	NM_004419	Body		RDMR		10:112247105-112248743				0.166707	0.193491	0.0267838	680	241	921
cg07748767	0.211288	2.05384	3.24972	0.00169218	0.999978	-1.63664	chr2	112659978	+	49797356		AAAACAAAAAACCACTAAAAAATTTTCAAATAAAAAATACAATCAAATTC		II			NA	NA	NA	NA	NA	NA	chr2:112656186-112656918	S_Shelf	CTTGAACACACATGTGAAACAGTCGCTTTCCATATAATAGCCAGAATGAGATTTTGGAAA[CG]AATCTGATTGTATTTTCCATTTGAAAATCTTCCAGTGGCTTCCTGTTCCCTACTAGAATT	GAACAGGAAGCCACTGGAAGATTTTCAAATGGAAAATACAATCAGATTCG			MERTK	NM_006343	Body								0.812383	0.789496	0.0228878	586	337	923
cg14990071	-0.250447	3.32769	-3.49177	0.000785108	0.999978	-1.12597	chr3	62975961	-	13773431		TCATCAATTCAAACCTACTCRAAAAACCTAATACCCATAAATTAAACTTC		II			NA	NA	NA	NA	NA	NA		OpenSea	GGCAGAACTAGTCATCAATTCAGGCCTGCTCGGGAAACCTGGTACCCATGAGTTAAGCTT[CG]GTAGCCATGCACGTCCTGGGCTCAAACTCAGCTCTGGGCAGAATAAGACAGCAATACAGT	CATCAATTCAGGCCTGCTCGGGAAACCTGGTACCCATGAGTTAAGCTTCG								TRUE					0.902913	0.916291	0.0133786	277	647	924
cg00293631	-0.211987	-2.45228	-3.31635	0.00137447	0.999978	-1.49856	chr22	28315337	+	19757420	47807417	CTCATATACCCAAAATAAAACACAAAACTAAACAAAACTAAACCCCCTCA	CTCGTATACCCGAAATAAAACACGAAACTAAACGAAACTAAACCCCCTCG	I	C	Grn	NA	NA	NA	NA	NA	NA	chr22:28314588-28315958	Island	CGAGCCACCATCGCGCCTGCGTGCTTACACCCTTCCGCCGCGACCAGTCGCGTCAGCGCG[CG]AGGGGGCCTAGCTCCGCCCAGTTTCGTGCCCCACCCCGGGCACACGAGGCCTCCACTGCG	CTCGTGTGCCCGGGGTGGGGCACGAAACTGGGCGGAGCTAGGCCCCCTCG			LOC284900;PITPNB;LOC284900	NR_026962;NM_012399;NR_026963	TSS200;TSS200;TSS200				22:26644402-26645929	22:28314334-28316233	Promoter_Associated		0.14944	0.167978	0.0185372	469	455	924
cg26148059	-0.228931	-0.8995	-3.15215	0.00228343	0.999978	-1.83529	chr6	33256755	-	41684373	35658323	CCAATTCTTCTTATTACAAAAAAACCCTAAAAAAACTCCAACTATAATCA	CCGATTCTTCTTATTACGAAAAAACCCTAAAAAAACTCCGACTATAATCG	I	A	Red	NA	NA	NA	NA	NA	NA	chr6:33256539-33256973	Island	AGGACGGAGCTCCCGATTCTTCTTGTTACGAGGAGGCCCTGGAGAGGCTCCGGCTGTGGT[CG]GAACGGTCTCTTCCTCCCAGTATCGCCGCGGTTTCTACAGGCACATCAGGAACTCCGCAC	CCGATTCTTCTTGTTACGAGGAGGCCCTGGAGAGGCTCCGGCTGTGGTCG			PFDN6;WDR46;WDR46	NM_014260;NM_005452;NM_001164267	TSS1500;Body;Body				6:33364518-33365187	6:33256480-33257731	NonGene_Associated		0.338424	0.372152	0.0337278	794	130	924
cg07511723	0.220601	2.92547	3.35612	0.00121253	0.999978	-1.41524	chr8	1323048	+	14701347		CTAACTATCRTATTAAACTTAAAATCCCACTCRTAAAACAAACRAATCAC		II			NA	NA	NA	NA	NA	NA	chr8:1321232-1321638	S_Shore	CACTCAGGAAAGCAACTGTGCGTGGGACTCCGGTGCCGCACGGCCTGGCACTTCGTCTTC[CG]TGACTCGCCTGTTTCACGAGTGGGATCCCAAGCCCAATACGACAGCCAGGGCATTGTCCT	TGGCTGTCGTATTGGGCTTGGGATCCCACTCGTGAAACAGGCGAGTCACG									8:1310346-1311684				0.888213	0.871212	0.0170013	421	504	925
cg15263723	-0.242922	3.33903	-3.52546	0.000703608	0.999978	-1.05295	chr17	78305484	+	43668306		TCCAATAACAAAACATAAATTACATTTAAAAAATCATAAACTAATTAAAC		II			rs114349828	0.029105	NA	NA	NA	NA		OpenSea	GGTGATCCGCCCATCTCAGCGTCCCAACGTGCTGGGTGGGATTACAGGCATGAGCCACTG[CG]CCCAACTAGTTTATGACTTTTTAAATGCAATTTATGTTCTGTCATTGGAGTGGGGTTTGG	CGCCCAACTAGTTTATGACTTTTTAAATGCAATTTATGTTCTGTCATTGG			RNF213	NM_020914	Body								0.903893	0.916722	0.0128289	248	680	928
cg26104475	0.159776	2.30194	3.39487	0.00107211	0.999978	-1.33338	chr5	169693176	+	31806404		TTTTTCTTCACAATTTACRCAAAATATTCTTAAATTACAATTACCTTCAC		II			NA	NA	NA	NA	NA	NA		OpenSea	CTTGCCCCATAGCAGTTGCTCAATAAATGGTAGCTAAGAATTGAATTGAAAATAGCTGCA[CG]TGAAGGTAACTGCAATCCAAGAATATTCTGCGTAAATTGTGAAGAAAAAGCACTGTGGTA	TTTTCTTCACAATTTACGCAGAATATTCTTGGATTGCAGTTACCTTCACG			LCP2	NM_005565	Body			TRUE					0.836253	0.820422	0.0158302	381	547	928
cg22227345	0.179589	-2.82525	3.53221	0.000688283	0.999978	-1.03828	chr15	96952113	+	72661388		RTAACCCAAATACRCAATCCTCAACATAACCAAATACCCCTAAACTAAAC		II			NA	NA	NA	NA	NA	NA	chr15:96952547-96953085	N_Shore	GGTACCCAGGGTGTCCCTGGGTACCGAGGAACCTCTCGGTCAGGAGGAGGCCAAGCCAGA[CG]TCCAGCTCAGGGGCACTTGGCCATGCTGAGGACTGCGCACCTGGGCCACGTGGTCCGTGG	CGTCCAGCTCAGGGGCACTTGGCCATGCTGAGGACTGCGCACCTGGGCCA									15:94753054-94753256				0.129233	0.116484	0.0127493	244	688	932
cg02504465	0.372997	-4.43006	3.66789	0.000439589	0.999978	-0.739305	chr6	108582065	-	19731481	32730386	ACAAATTACTCACATCAATCTCAAAAAAATTACTAAAAAATCCATAAACA	ACGAATTACTCACATCGATCTCGAAAAAATTACTAAAAAATCCGTAAACG	I	T	Red	NA	NA	NA	NA	NA	NA	chr6:108581716-108582669	Island	CCCCCACCGTTTGCGGGTTGCTCACATCGATCTCGAGGAAGTTGCTGGGGGGTCCGTAGG[CG]TCATTCAGGTTCTGCGGCTTGGTGATCAGCCGCCGGGTGTCAGCCACGGTCTCCGCCATT	CGCCTACGGACCCCCCAGCAACTTCCTCGAGATCGATGTGAGCAACCCGC		TRUE	SNX3;SNX3	NM_152827;NM_003795	1stExon;1stExon				6:108688410-108689485	6:108581286-108583170	NonGene_Associated		0.0501506	0.0395573	0.0105933	150	784	934
cg13372862	0.24143	2.40856	3.25624	0.00165829	0.999978	-1.62322	chr8	145235328	-	51685301	47768304	AACACTAAAAACCTTAACAAAAACCTTTAACAATATCCTCTCTCACAACA	AACGCTAAAAACCTTAACGAAAACCTTTAACGATATCCTCTCTCACAACG	I	T	Red	NA	NA	NA	NA	NA	NA	chr8:145235202-145235442	Island	GGAGGAGCACGGGGCGCTGGAAGCCTTGGCGGAGGCCTTTGACGGTGTCCTCTCTCACAG[CG]TTCGGCGTAGTCCCCTTCCTGCCATCCGTCCTGAGCTCCCTGCTGCCCGTGCTGGGCGTG	CGCTGTGAGAGAGGACACCGTCAAAGGCCTCCGCCAAGGCTTCCAGCGCC			HEATR7A;HEATR7A;HEATR7A	NM_001099281;NM_001099280;NM_032450	Body;Body;Body				8:145307159-145307399				0.847029	0.825358	0.0216713	565	370	935
cg20399842	-0.183698	3.54606	-3.94	0.000173587	0.999978	-0.119039	chr2	21346738	+	28642487	64647331	CAAACTTAAAAACCAAATACAACAAAAAAAACCTACAACTACACAAAACA	CGAACTTAAAAACCGAATACGACGAAAAAAACCTACAACTACGCAAAACG	I	T	Red	NA	NA	NA	NA	NA	NA		OpenSea	CCCTTACCAGGCCGCACACAGCTTCCGCCCTCAGGAAGCCAGGGACAGCGCCAGGCGGGA[CG]CTTTGCGCAGCTGCAGGCCTCCCCCGCCGCATTCGGCCTTCAAGCCCGCACATGCTCCCT	CGCTTTGCGCAGCTGCAGGCCTCCCCCGCCGCATTCGGCCTTCAAGCCCG									2:21200238-21200408				0.917437	0.925914	0.00847628	61	875	936
cg08799809	0.178472	-0.623553	3.16324	0.00220758	0.999978	-1.81292	chr12	111468036	-	29605442		TTATCTTCCCCRAAATTCTTACACAATTAATAAATTTCCTAAAAAATCCC		II			rs138971966	0.0114	NA	NA	NA	NA	chr12:111471061-111471578	N_Shelf	AGGACCTGCCATTATCTTCCCCGGGATTCTTGCACAGTTAGTGAATTTCCTAAAGGATCC[CG]GCTCTCTGCCTGCTTCTGCTGTTAGGATAGGCTGCCCCAAGCTGCCCTCTGATTCCTCTG	TATCTTCCCCGGGATTCTTGCACAGTTAGTGAATTTCCTAAAGGATCCCG													0.405513	0.374732	0.0307813	769	168	937
cg02835038	0.18912	-3.19863	3.62595	0.000505496	0.999978	-0.832495	chr21	47743854	-	43742467	21605387	AAAATTTTAAAATCAACCAATCACAACAAACACCAAACCTCCACTTTCCA	AAAATTTTAAAATCGACCAATCACAACGAACGCCAAACCTCCGCTTTCCG	I	C	Grn	NA	NA	NA	NA	NA	NA	chr21:47743685-47745351	Island	CCAGCCTGGCAGGGGATTTTAAAATCGGCCAATCACAGCGGGCGCCAGGCCTCCGCTTTC[CG]CTTACTGGTCCTGCCGTAGGAGGCGGGTACGTGAGCGCACCAATCTGTGGCCGGCGAGCG	CGGAAAGCGGAGGCCTGGCGCCCGCTGTGATTGGCCGATTTTAAAATCCC			PCNT;C21orf58	NM_006031;NM_058180	TSS200;TSS200				21:46567774-46569804	21:47743607-47744173	Promoter_Associated		0.103089	0.0921208	0.0109679	176	763	939
cg24264962	-0.220064	0.258022	-3.12998	0.00244229	0.999978	-1.87982	chr3	31958652	-	60652460		AAATAAAACAAAACAAAATCRATATCACAACCRAAATTCAACATCCCACC		II			rs7641636	0.345909	NA	NA	NA	NA		OpenSea	AGGACACTGGAGAATAAGACAAGACAAAGTCGGTGTCACAGCCGGGGTTCAGCATCCCAC[CG]GTGCCCACACTAGGCCCCACACAAGAAATTACACGACAGTTACAGCGTTCATGTGAGGTG	AATAAGACAAGACAAAGTCGGTGTCACAGCCGGGGTTCAGCATCCCACCG			OSBPL10	NM_017784	Body			TRUE					0.530288	0.568374	0.0380868	847	92	939
cg24153199	0.317387	-4.3642	3.81951	0.000263208	0.999978	-0.39698	chr14	50698328	+	58632317	39786338	CATAACAAAAATCAAAACAAAACTAAACCAACTATACCCCTAACAAACCA	CGTAACGAAAATCGAAACGAAACTAAACCAACTATACCCCTAACGAACCG	I	C	Grn	NA	NA	NA	NA	NA	NA	chr14:50697800-50698733	Island	TCCTTTCCCGGCGGCGCTGGCCCGCTTCTGGGGCGGCTCCTCCTCCTTTGTCTGGGTTCG[CG]GCCCGTCAGGGGTACAGCTGGCCCAGCCCCGCCCCGACTCCCGCTACGGCCGCGGCGGGC	CGGCCCGTCAGGGGTACAGCTGGCCCAGCCCCGCCCCGACTCCCGCTACG			SOS2	NM_006939	TSS1500	high-CpG:49767690-49768153			14:49767551-49768692				0.0509288	0.0419581	0.00897073	87	855	942
cg05837753	-0.186919	2.98522	-3.51186	0.000735489	0.999978	-1.08248	chr12	8926941	+	54666407		AAAAAACCTTTATTAAATTATATTCAATTTAACCTCCCACCAAATTAAAC		II			NA	NA	NA	NA	NA	NA		OpenSea	GTAGTTTATGAAATCTTGAGGGGCTCTTTTACTGGGATTTCTTATTTTTTTGTTTTTTCC[CG]CTTAATTTGGTGGGAGGTCAAATTGAATATAACCCAATAAAGGCTTCTTAATGACAAAAT	AGAAGCCTTTATTGGGTTATATTCAATTTGACCTCCCACCAAATTAAGCG			RIMKLB	NM_020734	3'UTR								0.882227	0.894997	0.0127697	261	684	945
cg24300924	0.140334	-3.30256	4.14399	8.43696e-05	0.993103	0.362643	chr18	12407808	+	52788503		CCCRTCTAATAACTAAACTAACTACAACRACTAAAAATAACTCTACRAAC		II			rs141200952	0.0119	NA	NA	NA	NA	chr18:12407715-12408242	Island	AGCAAGCGCGCATCGCGCACCCCAGGGTAGCAGCGCAGGTCTGGGGCTGCGCCACAGCCG[CG]CCCGCAGAGCTATTTTTAGCCGCTGCAGCCAGCCTAGCCACCAGACGGGGTGGGCGGCAT	CGCCCGCAGAGCTATTTTTAGCCGCTGCAGCCAGCCTAGCCACCAGACGG		TRUE	SLMO1;SLMO1	NM_001142405;NM_006553	TSS200;TSS200				18:12397666-12398518	18:12407515-12408413	Unclassified		0.0951057	0.087556	0.0075497	34	913	947
cg23127291	0.24129	1.73489	3.16323	0.00220767	0.999978	-1.81295	chr16	57563324	+	68734402		TACCTCATTAAAACTCTCCTAAAACAAAACTCTCTCCTCCTACCTTAACC		II			NA	NA	NA	NA	NA	NA	chr16:57562451-57563325	Island	CTGCGACCACCGTCAGTCTCGAAGATCAGCCGCGCCAAGGCCCTGGCGGAGGGAACAGAA[CG]GCCAAGGTAGGAGGAGAGAGTTCTGTTCCAGGAGAGTCCCAATGAGGCAGGATTGGTGGA	CGGCCAAGGTAGGAGGAGAGAGTTCTGTTCCAGGAGAGTCCCAATGAGGC			CCDC102A	NM_033212	5'UTR					16:57563152-57563608	Unclassified_Cell_type_specific		0.777455	0.747126	0.030329	770	177	947
cg12039611	-0.219269	-2.90465	-3.34541	0.00125429	0.999978	-1.43775	chr1	156786653	+	67633309		AACTACRTAACTTCCRAAAATAAAACAATCRTCTTAAAACTTTCCATAAC		II			NA	NA	NA	NA	NA	NA	chr1:156783523-156784037	S_Shelf	CCTGGCCCCGGGGGCAGGAAATGTCGCCTTACCCACAGCCTTAGTTCTGGCGAGGACTCA[CG]TCATGGAAAGCCTTAAGACGATTGTCCCACCCCCGGAAGCCACGCAGCTGTAGATAGCGG	GCTGCGTGGCTTCCGGGGGTGGGACAATCGTCTTAAGGCTTTCCATGACG			NTRK1;SH2D2A;SH2D2A;SH2D2A;SH2D2A;SH2D2A	NM_001007792;NM_003975;NM_001161444;NM_001161443;NM_001161442;NM_001161441	Body;TSS200;TSS200;TSS1500;TSS200;TSS200					1:156785631-156787029	Promoter_Associated		0.113436	0.129826	0.0163909	432	517	949
cg07158939	0.295401	3.10397	3.25054	0.00168788	0.999978	-1.63495	chr1	32476805	-	43621424		TAACCAAAATCTATCTTCTACATTAAACTCCAACAACACTTAATTTTTTC		II			NA	NA	NA	NA	NA	NA	chr1:32479102-32480583	N_Shelf	TTATTCTTCCTTGGCCAAAATCTATCTTCTGCATTGAACTCCAACAGCACTTAATTTTTT[CG]TTTCTTTTTTCTTTTTGACACGGAGTCTGACTCTGTTGCCCAGGCTGGAGTGCAGTGTGG	GGCCAAAATCTATCTTCTGCATTGAACTCCAACAGCACTTAATTTTTTCG													0.900733	0.878981	0.0217518	581	369	950
cg22869025	-0.131473	-2.78183	-3.64575	0.000473285	0.999978	-0.788578	chr20	25037708	-	57731342		TCTACTCAACAAATTCCAAACAACTAACCACCAATCAACTATTTAAAACC		II			NA	NA	NA	NA	NA	NA	chr20:25037707-25039211	Island	GCAGCAGGGCCTCTGCTCAGCAAGTTCCAAACAACTGACCACCAGTCAACTGTTTGGGGC[CG]ACGTCAGACCCCGCGGGTCCAAAGCAGGCCCCAGGTCGCTGGGGTGCAGTTCTCTGAGGC	CGGCCCCAAACAGTTGACTGGTGGTCAGTTGTTTGGAACTTGCTGAGCAG			ACSS1	NM_032501	Body			TRUE				TRUE	0.123588	0.134064	0.0104765	163	789	952
cg08532914	-0.167363	-0.449705	-3.18019	0.00209626	0.999978	-1.77864	chr3	11763045	-	64646405		AAAACTCRAAAAATTCCCAATCTTCCCAAAAATACTCTTACATAAACTCC		II			rs11128570	0.4372	NA	NA	NA	NA	chr3:11760638-11762078	S_Shore	ATTCACAGATTAAAGCTCGGAAGGTTCCCAGTCTTCCCAAAGGTACTCTTACATAGACTC[CG]TTTTAGTCCATCAGTAGTCTCGGACTAGGAAAAGAGAAATCCTGAGAAAGACTGTAAATA	CGGAGTCTATGTAAGAGTACCTTTGGGAAGACTGGGAACCTTCCGAGCTT			VGLL4	NM_014667	TSS1500					3:11762853-11763054	Unclassified_Cell_type_specific		0.412947	0.441078	0.0281315	737	216	953
cg09062961	-0.195781	3.34879	-3.60869	0.000535248	0.999978	-0.870637	chr2	1204735	-	27782464		TATATTAAACTTAAATTCTATATTCCAAATACCTACAAATACCTCTCCCC		II			NA	NA	NA	NA	NA	NA		OpenSea	ATCAGTTGAAATGTGTTGGACTTGAGTTCTGTGTTCCAGGTGCCTGCAGATGCCTCTCCC[CG]CATGCAGCCTCCTCTGCCTCTGTGACGCTTCATTCTCCTTTCTTCTGTACAGGCCCCATC	CGGGGAGAGGCATCTGCAGGCACCTGGAACACAGAACTCAAGTCCAACAC			SNTG2	NM_018968	Body				2:1194735-1194880	2:1204726-1204934	Unclassified_Cell_type_specific		0.90574	0.916648	0.0109087	183	771	954
cg09348504	-0.213558	3.53607	-3.80138	0.000280032	0.999978	-0.438346	chr2	209025539	+	47716467	48649369	CAACTAAAAAAATACAAATACCAAAATCAACTCTTTAAAACAAATCACCA	CGACTAAAAAAATACAAATACCAAAATCGACTCTTTAAAACGAATCACCG	I	A	Red	NA	NA	NA	NA	NA	NA		OpenSea	TTGTATATTTATTATGTTTCTATGGGGATCACAACAAGGCAGGCACAGCTTAGTACAAAT[CG]GTGACCCGTCTCAAAGAGCCGACTTTGGCATCTGCACCCCCCCAGTCGTGGTACCTTCTG	CGGTGACCCGTCTCAAAGAGCCGACTTTGGCATCTGCACCCCCCCAGTCG	TRUE		CRYGA	NM_014617	Body								0.916516	0.925324	0.00880768	93	862	955
cg24519533	0.234003	3.56315	3.60451	0.0005427	0.999978	-0.879858	chr2	135226787	-	71685503	40723309	TCCAAAAAACCAAAACTAAACTCCACCACAACCTATCCAAAAACTATACA	TCCAAAAAACCAAAACTAAACTCCACCGCGACCTATCCAAAAACTATACG	I	A	Red	rs55654488	0.047743	NA	NA	NA	NA		OpenSea	GAAACTTCAACTTCCAAGAGACCAGGACTGAGCTCCACCGCGGCCTATCCAGGGGCTGTG[CG]GGAAGTTTCCTGTACCTGGGAGGCTTCATCTCGGGGGAGCTCTCGATGGACCGGAGGGCC	TCCAAGAGACCAGGACTGAGCTCCACCGCGGCCTATCCAGGGGCTGTGCG			TMEM163	NM_030923	Body				2:134943235-134943814				0.924738	0.913813	0.0109246	187	768	955
cg04728296	0.276267	-2.70597	3.23079	0.00179431	0.999978	-1.67552	chr4	166414646	-	61620416		ATAAAACCCAAAACRACTACTACRTTAAAAATCCRAATACAACAAATAAC		II			NA	NA	NA	NA	NA	NA		OpenSea	AGGCGGAGTGAGTGGAGCCCAGGGCGGCTGCTGCGTTAGAAATCCGGGTGCAGCAGATGG[CG]CCCTTTCCTCAGCTATCTCGCCCCAGAGCTGGGAGGTGGTGCCACAGGCTGCCGATTCTT	TGGAGCCCAGGGCGGCTGCTGCGTTAGAAATCCGGGTGCAGCAGATGGCG			CPE	NM_001873	Body				4:166634039-166634271	4:166414250-166415399	Unclassified	TRUE	0.144171	0.121151	0.0230196	623	332	955
cg04134015	0.189651	1.34394	3.20642	0.00193428	0.999978	-1.72534	chr3	193310532	-	24773350		CCATCTAATCCTCAAAAATTCTAAAAAACTTAACCTATCCATAACTCTTC		II			NA	NA	NA	NA	NA	NA	chr3:193310824-193311188	N_Shore	AAGTCCCTTTCCCATCTGATCCTCAGAGATTCTAAGGGACTTAGCCTATCCATGACTCTT[CG]TCCTGCTTCTCACCTCCCATGATTGCCCTAACGATGTGAAAGTGCTTTCAAACAAAGATG	CATCTGATCCTCAGAGATTCTAAGGGACTTAGCCTATCCATGACTCTTCG			OPA1;OPA1;OPA1;OPA1;OPA1;OPA1;OPA1;OPA1	NM_130833;NM_130837;NM_130835;NM_130834;NM_130836;NM_015560;NM_130832;NM_130831	TSS1500;TSS1500;TSS1500;TSS1500;TSS1500;TSS1500;TSS1500;TSS1500					3:193310388-193311249	Promoter_Associated		0.72512	0.700187	0.0249337	670	285	955
cg16260610	0.225484	3.42905	3.60984	0.000533223	0.999978	-0.868109	chr6	30152322	+	25772365		TCACATATACATCTTATTTCTACCTCTAATTTTATAAACTCCTAAAAAAC		II			rs7843	0.156295	NA	NA	NA	NA		OpenSea	CTCTGTGCCCAGCACTGCACTAGGTGCCATGAGAATACAAGAGTAGTATAAGATGTTATC[CG]CCCTCCAGGAGCTTACAAAACTAGAGGCAGAAATAAGATGTACATGTGACTCAGGCAGCA	CGCCCTCCAGGAGCTTACAAAACTAGAGGCAGAAATAAGATGTACATGTG			TRIM26	NM_003449	3'UTR								0.917748	0.906958	0.0107904	182	774	956
cg02940003	0.233367	0.126138	3.13276	0.00242187	0.999978	-1.87426	chr3	186174294	+	61673340		TAACAACAAAATAACCCTTCCTCCTCTAAAAACCTAAACATCAACAAATC		II			NA	NA	NA	NA	NA	NA		OpenSea	CAGGGGGCAGGCCTCCTGAGCCCCCAGCAGGATTCCATTTCTCCACCTTCCACTGCCATC[CG]ACTTGCTGATGCCCAGGCCCCCAGAGGAGGAAGGGCTATCCTGTTGTTATGAGAACAAAT	AACAACAGGATAGCCCTTCCTCCTCTGGGGGCCTGGGCATCAGCAAGTCG								TRUE					0.53449	0.499033	0.0354569	843	113	956
cg16922753	0.230339	-0.0802243	3.12531	0.00247708	0.999978	-1.88918	chr8	1113291	-	66618368		ATCRCCTCCCTCTAAAAAATCCCCTATTCTAAAATATTAAACTCCCAAAC		II			NA	NA	NA	NA	NA	NA	chr8:1113058-1114073	Island	GCCTCCTCCCAATCGCCTCCCTCTGGGGAGTCCCCTGTTCTGAGATATTAAACTCCCAGA[CG]GGACCACGCGGGCTGTGCCGCACCCCCTGCCTGCTGCCGGCCTTCCCGGGGTGTCGTGTT	TCGCCTCCCTCTGGGGAGTCCCCTGTTCTGAGATATTAAACTCCCAGACG									8:1100442-1101830				0.500145	0.462261	0.0378844	864	93	957
cg01897796	0.373436	-3.99712	3.47853	0.000819506	0.999978	-1.15453	chr15	59225903	+	49611341	25724431	CCATCATCCAAATACTAACAACTACTACTACAAATTACACTAAAATAACA	CCGTCATCCGAATACTAACGACTACTACTACAAATTACGCTAAAATAACG	I	A	Red	NA	NA	NA	NA	NA	NA	chr15:59225272-59226300	Island	CGGCGGCCGCCGGCGCCGCGCAGCGCTGCGCACAATGAGCCGCTGGCCCCTCCCCCGGTC[CG]CCACCCTAGCGCAACCTGCAGCAGCAGCCGCCAGCACCCGGATGACGGCCGCGCGTGCGC	CGCCACCCTAGCGCAACCTGCAGCAGCAGCCGCCAGCACCCGGATGACGG			SLTM;SLTM	NM_001013843;NM_024755	TSS200;TSS200	high-CpG:57012832-57013285			15:57012458-57013565	15:59225018-59226807	Promoter_Associated		0.066275	0.0532368	0.0130382	295	665	960
cg02004048	0.238016	1.78253	3.19505	0.00200299	0.999978	-1.74848	chr6	109868066	+	54649446		ATAAAATACCTAAATACAATCTAAACACCAAACAACCCTAATTACRAAAC		II			NA	NA	NA	NA	NA	NA		OpenSea	ATTTTAAACCTCTCCGTGATAAAACTACCGGATTAACACTTCACTCACCCACCAGTTAAA[CG]TCTCGCAACTAGGGCTGTCTGGTGCTCAGACTGTATTCAGGTACCCTATGGTAGGGAAGG	CGTCTCGCAACTAGGGCTGTCTGGTGCTCAGACTGTATTCAGGTACCCTA			AKD1	NM_001145128	Body								0.781779	0.755833	0.0259466	703	257	960
cg14728415	-0.153094	-2.74238	-3.5361	0.000679577	0.999978	-1.0298	chr7	32535168	+	55613484		ACAACACATAAAAACCRCACAAAAAAATCRATAAAAACAAAACAACTCCC		II			rs56981934	0.378995	NA	NA	NA	NA	chr7:32535086-32535540	Island	GTGACAGCCCGGAAGCTGCGGAAGCGGATGAGGGAAGGGCGGCCGTGGCCCTGGGGGCGG[CG]GGAGCTGCTTTGCCTCCACCGATCTCCCTGTGCGGCCCTCATGTGCTGTGCTCGCTGACA	CAGCACATGAGGGCCGCACAGGGAGATCGGTGGAGGCAAAGCAGCTCCCG			LSM5;LSM5;AVL9	NM_001139499;NM_001130710;NM_015060	TSS1500;TSS1500;TSS200	high-CpG:32501577-32501736			7:32501359-32502065	7:32534392-32536147	Promoter_Associated		0.126372	0.138255	0.0118835	241	720	961
cg01391867	-0.316189	-3.54638	-3.39604	0.00106811	0.999978	-1.3309	chr7	99097871	+	40713424	44730502	ACTTCCAACACAAAATATTTTCAATTATTTAACCAAAAAAATTATAAACA	GCTTCCGACACGAAATATTTTCGATTATTTAACCGAAAAAATTATAAACG	I	C	Grn	NA	NA	NA	NA	NA	NA	chr7:99097277-99098104	Island	CCCAAACACCGGGCCCCACCACACCAGGCCCCTCTCCACACTCTCCTTTCCTCAGCTTTG[CG]CCTACAACTCTCTCGGTCAAACAACCGAAAACATCCCGTGCCGGAAGCGCGTCATCGAGG	CGCCTACAACTCTCTCGGTCAAACAACCGAAAACATCCCGTGCCGGAAGC			ZNF394;ZNF394	NM_032164;NM_032164	5'UTR;1stExon	high-CpG:98935801-98935905			7:98935148-98936031	7:99097062-99098354	Promoter_Associated		0.075895	0.0907901	0.0148952	378	584	962
cg07936585	0.123727	0.603159	3.26859	0.00159584	0.999978	-1.59774	chr2	238472405	+	74679480		AATATACAACTCACCRTTCTCRAATATAATAAAAAAACTATCCTAACTAC		II			NA	NA	NA	NA	NA	NA		OpenSea	GTCCTCTCGGGGGCTATAAAAGGGGAACAGAGGCTCCCGCCTCCTCGGCTCCACTGCACC[CG]TAGCCAGGACAGCTCCTCTACCACACTCGAGAACGGTGAGTTGCACATCCAGGCGCTGGA	ATGTGCAACTCACCGTTCTCGAGTGTGGTAGAGGAGCTGTCCTGGCTACG									2:238137028-238137145				0.609959	0.590096	0.0198636	549	415	964
cg05124021	0.196162	-1.53663	3.20822	0.00192355	0.999978	-1.72165	chr7	157487066	-	25718345	26738463	CTCATCCACACCTTAATACACCTACAACAATATATTCTAAATAACAAACA	CTCGTCCACGCCTTAATACACCTACGACAATATATTCTAAATAACAAACG	I	A	Red	NA	NA	NA	NA	NA	NA	chr7:157476886-157486719	S_Shore	ACAGCACACTTCCTCGTCCACGCCTTGGTGCACCTGCGGCAATATATTCTGGGTGGCAGA[CG]GTTATTTATGTCTGAGAGCCTCCAACTCACTCCCCTTCCTCCCACCACCCCTCCTCTAAG	CTCGTCCACGCCTTGGTGCACCTGCGGCAATATATTCTGGGTGGCAGACG			PTPRN2;PTPRN2;PTPRN2	NM_002847;NM_130842;NM_130843	Body;Body;Body		CDMR			7:157487000-157487313	Unclassified_Cell_type_specific		0.266695	0.242523	0.0241723	665	299	964
cg07160277	-0.195245	-4.29092	-4.62895	1.40408e-05	0.993103	1.55739	chr4	165304855	+	66797343		CCTAAAAAACAAACAACAAATACCTTTACCTAATAAATCCACTAAAAAAC		II			NA	NA	NA	NA	NA	NA	chr4:165304328-165305177	Island	CTACTGGGCGAGCCCGCCGCCCGCAGGTTGGGTGGCAGCACCCGCCGCGAACCCCAGCCA[CG]CTCCCCAGTGGACCCACCAGGCAAAGGCACCTGCTGCCTGCCCTCCAGGGCTGATGCTGT	CGCTCCCCAGTGGACCCACCAGGCAAAGGCACCTGCTGCCTGCCCTCCAG			2001-03-01	NM_001166373	TSS1500				4:165523779-165524912				0.0466995	0.0529224	0.00622295	4	962	966
cg15685268	0.197751	-3.24228	3.50834	0.000743962	0.999978	-1.09011	chr11	133827456	+	35796385		AACTCACTCTAAATCTTAACRACTTTAAAAAATCATTTTAATCATCCCCC		II			NA	NA	NA	NA	NA	NA	chr11:133825337-133827457	Island	CCTCCGCACCCAGACACGTCCCCAGAGCAGCGCACCACCCCCTCCAAACGTGATGCAGAC[CG]GGGGATGACTAAAATGACCTCTCAAAGTCGCTAAGATTTAGAGTGAGTCATTGGCTCAGC	CGGGGGATGACTAAAATGACCTCTCAAAGTCGCTAAGATTTAGAGTGAGT			IGSF9B	NM_014987	TSS1500		DMR	TRUE	11:133330347-133332667				0.101168	0.088686	0.0124817	266	700	966
cg21376774	-0.254305	-3.92296	-3.6823	0.000418902	0.999978	-0.707145	chr18	12254241	+	62617327	17661382	AAAAACCTAACTAACACAAAAAAAAACATTTTAACACAAACTCTCCACCA	GAAAACCTAACTAACGCAAAAAAAAACGTTTTAACACGAACTCTCCACCG	I	C	Grn	rs28362151	0.036056	NA	NA	NA	NA	chr18:12254147-12255089	Island	TCCAGGCTGCGGGAGCCAGGACGACCGGGGGCTCCCAGAGCGCGAAGTCGCGATCCTCGG[CG]GTGGAGAGCTCGTGCCAAAACGTCCTCCCCTGCGCCAGTCAGGCCTTCGCGGGGCTGGCA	GAAGGCCTGACTGGCGCAGGGGAGGACGTTTTGGCACGAGCTCTCCACCG			CIDEA;CIDEA	NM_198289;NM_001279	TSS1500;TSS200				18:12243567-12245089			TRUE	0.0594515	0.0691772	0.00972568	144	823	967
cg24112713	-0.179422	-3.13112	-3.52399	0.000707004	0.999978	-1.05616	chr14	21494093	-	56606453		AAAAACTCTAACTCCTAAATAAACAAACRCAAAAACRAAATTAACCCTAC		II			NA	NA	NA	NA	NA	NA	chr14:21492735-21494270	Island	CGGGGACCCCCAGAGGCTCTGACTCCTGGGTAAACAGGCGCAGGGGCGGAGTTAACCCTG[CG]GGGGTGGAGTAGGGGCTTGGGGAGGACGCAGTGTCCTGGGCTGGGACCCAAGAGACCCTG	GAGGCTCTGACTCCTGGGTAAACAGGCGCAGGGGCGGAGTTAACCCTGCG			NDRG2;NDRG2;NDRG2;NDRG2;NDRG2;NDRG2;NDRG2;NDRG2	NM_201539;NM_201535;NM_201536;NM_201538;NM_201541;NM_201540;NM_016250;NM_201537	TSS1500;TSS200;TSS200;TSS1500;TSS1500;TSS1500;TSS200;TSS200				14:20562576-20564110			TRUE	0.0989381	0.110988	0.0120502	253	714	967
cg13850887	-0.230535	3.4345	-3.51322	0.00073225	0.999978	-1.07954	chr2	241993303	+	33745505		ACATCACACAAACTTTCTAATAAACAATTTAAACTCCTCTAACATAATAC		II			NA	NA	NA	NA	NA	NA	chr2:241992490-241992713	S_Shore	AAGGCTCCCTCTGACCGAAGCCCCTGGAGAAGTAGGGCCATTAACACCCTGCAGGTGCAT[CG]CATTATGCCAGAGGAGTCCAAACTGTCCATCAGAAAGTCTGTGTGATGTGAGCTAGTTTT	CGCATTATGCCAGAGGAGTCCAAACTGTCCATCAGAAAGTCTGTGTGATG			SNED1	NM_001080437	Body								0.909537	0.921789	0.0122515	260	707	967
cg00435528	0.208473	2.96083	3.41013	0.00102116	0.999978	-1.30099	chr7	76143274	-	57728401		TCRAAAAACAACCCCTCTAAACAACTAATATATATACAAAAAAAACCCCC		II			NA	NA	NA	NA	NA	NA	chr7:76145396-76145781	N_Shelf	CAGCCCTGGGGTCGAGGGGCAGCCCCTCTGAGCAGCTGGTGTGTGTGCAGGGAAGACCCC[CG]GATCCATCGACACCTGGCCAGGGCGGCGAAGTGGCAGCATGATCGTCATTACCTCCATCC	CGGGGGTCTTCCCTGCACACACACCAGCTGCTCAGAGGGGCTGCCCCTCG			UPK3B;UPK3B	NM_182684;NM_030570	Body;Body	low-CpG:75981113-75981338							0.890013	0.875831	0.0141818	358	609	967
cg27621721	0.486001	1.11117	3.09145	0.00274327	0.999978	-1.9567	chr3	189901160	+	62733489		TTCAACATCACACCAAACTAAATTATCAAACTTCTATTTTTAAATTCAAC		II			NA	NA	NA	NA	NA	NA		OpenSea	AGACCACAGCATGAGGCAGACAAACAGAAAACAATGAGGTCATGCAGAAGTAGCTCATTA[CG]CTGAACCCAAAAATAGAAGCCTGACAACCCAGCTTGGTGTGATGTTGAAAAGCACTGGAC	CGCTGAACCCAAAAATAGAAGCCTGACAACCCAGCTTGGTGTGATGTTGA								TRUE				TRUE	0.701928	0.628999	0.072929	958	10	968
cg00754900	0.21473	-3.75749	3.70739	0.000385064	0.999978	-0.650941	chr14	62228975	-	55778381		AATCTCAACACTCTAAATAAAAACAATCTCAACCAATAAAACATCAAAAC		II			rs56971798	0.306746	NA	NA	NA	NA	chr14:62228974-62229268	Island	AAAGAAGGGTGGATCTCAGCACTCTGGGTGAAAGCAATCTCAGCCAGTAAAACATCAGAA[CG]CTTTCACGCACGCGCAGTAAGCACACGACCGGTGGCAAGAGCCCGGATAAAGGCGGAGCT	ATCTCAGCACTCTGGGTGAAAGCAATCTCAGCCAGTAAAACATCAGAACG			SNAPC1	NM_003082	TSS200				14:61298728-61299131	14:62228356-62229621	Promoter_Associated		0.0731112	0.0637892	0.00932207	131	840	971
cg03007208	0.329842	-4.88688	4.1282	8.92785e-05	0.993103	0.324896	chr19	36266554	-	37682501	34648480	AAAAACAACAAACAAAAAATCAAACACAACCAAAACCTAAAAAAACTACA	GAAAACGACGAACGAAAAATCGAACGCGACCGAAACCTAAAAAAACTACG	I	C	Grn	NA	NA	NA	NA	NA	NA	chr19:36266234-36266622	Island	GGCAGCGGCGACGAGAACGGCGAGCGAGGGGTCGAGCGCGGCCGGGGCCTGAGGAGGCTA[CG]CGACCATGGTGGTAAGGGTCCCACGCGGCCGTCAGCCTGTCCGTCCGGATGTCAGTCTGT	GAGAACGGCGAGCGAGGGGTCGAGCGCGGCCGGGGCCTGAGGAGGCTACG			SNX26;SNX26	NM_052948;NM_052948	1stExon;5'UTR				19:40958075-40958592	19:36265655-36267172	Unclassified		0.0361442	0.0292111	0.00693305	36	937	973
cg27258399	-0.23003	-3.57021	-3.55563	0.000637492	0.999978	-0.987189	chr8	38832267	+	72790350		AAAATCTTATTCCTTTACRCTCCTCCAAAATTAAAAAATATTCCRAAAAC		II			NA	NA	NA	NA	NA	NA	chr8:38831592-38832353	Island	TCCCGGCCGTGCCTGTGCAGTGGGGGAACTGCGGGGATACAGGTGAGCCGCGGGGGCGCG[CG]CCCTCGGAACACTTTCTAACTCTGGAGGAGCGTAAAGGAACAAGACCTCACTGAGACCGC	AGGTCTTGTTCCTTTACGCTCCTCCAGAGTTAGAAAGTGTTCCGAGGGCG		TRUE	HTRA4	NM_153692	Body			TRUE	8:38950750-38951774				0.0747961	0.0859922	0.0111961	220	753	973
cg20281962	0.434507	-2.81109	3.12589	0.00247276	0.999978	-1.88803	chr10	8089733	-	56709400	24670384	TACATCTAATTACTATTTTATTTTATATAACAAATTACTTAAAATCCACA	TACGTCTAATTACTATTTTATTTTATATAACAAATTACTTAAAATCCGCG	I	A	Red	NA	NA	NA	NA	NA	NA	chr10:8091374-8098329	N_Shore	AGAACAGGCACATGCGTCTGGTTGCTGTTTTGTTTTATATAACAAATTGCTTAGGGTCCG[CG]AGGTGGAAGGCAGCCTAGAGCTGAGCTGCCCGGAGGGAGGGGCTGCGGGTAGGGGGCAGT	CGCGGACCCTAAGCAATTTGTTATATAAAACAAAACAGCAACCAGACGCA							CDMR	TRUE	10:8129618-8129952				0.145427	0.109531	0.0358956	862	111	973
cg00874835	-0.332505	-3.35073	-3.20581	0.00193789	0.999978	-1.72657	chr2	3381734	-	47628340	24662473	ACACTAACTTATACACATAACCACTTAAACTCACATCCAAACTCTCAACA	ACGCTAACTTATACGCATAACCACTTAAACTCACATCCGAACTCTCAACG	I	C	Grn	NA	NA	NA	NA	NA	NA	chr2:3381344-3381912	Island	CCAATGGCAGCGGCGCTGGCTTGTGCGCATGGCCACTTGGGCTCACATCCGGGCTCTCAG[CG]CGGGGACTCCTGGAGGTGAGAACCCGGCCCAGAGGAAATAAGTTGGTGGGCGGAGCGGGC	GCGCTGGCTTGTGCGCATGGCCACTTGGGCTCACATCCGGGCTCTCAGCG			TSSC1	NM_003310	TSS200				2:3360369-3361076	2:3381333-3381882	Promoter_Associated		0.0843195	0.108314	0.0239948	671	305	976
cg13954292	0.312459	0.753659	3.09594	0.00270644	0.999978	-1.94776	chr5	32445523	+	14722349		TCTATATTTTAACTACCRACTATTAACTAACATATACCCRCTCCTAAAAC		II			NA	NA	NA	NA	NA	NA	chr5:32443753-32444923	S_Shore	GTTGTAGGTGCTGGAGATACGGCAGAGAACAAAACAAAGTCCCTGTTCCCGTGGAGTTTA[CG]TTCTAGGAGCGGGTATATGTCAGCCAACAGCCGGTAGCCAAAACACAGAAATTCTGTCTG	CGTTCTAGGAGCGGGTATATGTCAGCCAACAGCCGGTAGCCAAAACACAG		TRUE	ZFR	NM_016107	TSS1500					5:32445345-32445590	Unclassified		0.642818	0.593892	0.0489269	944	32	976
cg25325612	-0.178257	-3.79874	-3.86501	0.000225117	0.999978	-0.292607	chr16	46723166	+	68710371		CAATAAACACRCRAAACTCRAATTCCTAAAAATAAACCAATCAATAAACC		II			NA	NA	NA	NA	NA	NA	chr16:46722564-46724107	Island	TGTGACGCTGCGGCCCCTCCAAGCCCCGCCCTCTCTAGCCCCGCCCCCGGGCCCTACAGG[CG]GCTCATTGATTGGCCTACTTCTAGGAACCCGAGTCTCGCGTGCTTATTGGCCCTGTCACT	AATAAGCACGCGAGACTCGGGTTCCTAGAAGTAGGCCAATCAATGAGCCG		TRUE	ORC6L;VPS35	NM_014321;NM_018206	TSS1500;TSS200				16:45279875-45281777	16:46722828-46723677	Promoter_Associated		0.0647356	0.0725757	0.00784014	78	901	979
cg03955175	-0.279124	-3.72438	-3.49661	0.000772861	0.999978	-1.1155	chr7	128095977	+	23731466	67684408	AAAAATCCAAAAAAAAATCAATTACTAAACACCAACACAAAAACTTCCCA	AAAAATCCGAAAAAAAATCGATTACTAAACACCAACGCAAAAACTTCCCG	I	C	Grn	NA	NA	NA	NA	NA	NA	chr7:128095678-128096197	Island	GGGCGGCGTTGCTCTGCGCTCTGCGGCTGACGGCGCTTTTGTCTCCGGTGAGTTTTGTGG[CG]GGAAGCTTCTGCGCTGGTGCTTAGTAACCGACTTTCCTCCGGACTCCTGCACGACCTGCT	AGGAGTCCGGAGGAAAGTCGGTTACTAAGCACCAGCGCAGAAGCTTCCCG			C7orf68;C7orf68;C7orf68	NM_013332;NM_001098786;NM_013332	1stExon;5'UTR;5'UTR	high-CpG:127883117-127883236			7:127882777-127883433	7:128095368-128096412	Promoter_Associated		0.0675056	0.0799349	0.0124293	275	704	979
cg13717540	0.238402	3.57544	3.51121	0.000737061	0.999978	-1.0839	chr9	137646141	-	41663420		TAACCCTTTATCTCTTACCCCTAACAAAATCCTCRAAATATACAAAACCC		II			NA	NA	NA	NA	NA	NA		OpenSea	GGACTCGCCACTGACCCTTTGTCTCTTACCCCTGGCAGGGTCCTCGAGGTGTGCAAGGCC[CG]CCTGGTCCGGCCGGGAAGCCCGGAAGACGGGTGAGTGGTGCGAGTGTGTGTGGTTTAGTG	CGGGCCTTGCACACCTCGAGGACCCTGCCAGGGGTAAGAGACAAAGGGTC			COL5A1	NM_000093	Body				9:136785330-136785985				0.925613	0.913716	0.0118965	262	718	980
cg06875162	-0.200815	-3.08722	-3.42823	0.000963655	0.999978	-1.26241	chr1	28184973	-	64810303		ACAAACCCAAATCACAACCCTAACAAACCATACAATAAAAATTCTAACCC		II			NA	NA	NA	NA	NA	NA		OpenSea	GCTCAGGGTACACAGACCCAGGTCACAGCCCTGGCAAGCCATGCAGTGGGGATTCTAGCC[CG]GCCCTGAGGTTTTGGAGCAGGGACGGTGCAGGGGAGTCTCCAGCCCAGGCTCCTCCCCTG	CAGACCCAGGTCACAGCCCTGGCAAGCCATGCAGTGGGGATTCTAGCCCG								TRUE		1:28183692-28185616	Unclassified		0.101581	0.115043	0.0134621	339	641	980
cg07843733	-0.217438	2.87924	-3.33568	0.00129338	0.999978	-1.45815	chr7	140567399	+	31636311		ATAAAACCTTCAAATTTTACCATACTACAAAATAAATAACCACCCACCCC		II			NA	NA	NA	NA	NA	NA		OpenSea	ACAGACAATGTCAGATGGTCATAAAAAGTTATAGAGAAAAACAGAGACTGTGAGCAGGAT[CG]GGGTGGGTGGCTATTCATTTTGTAGTATGGTAAAACTTGAAGGTCTCATTGGTAAGATGA	CGGGGTGGGTGGCTATTCATTTTGTAGTATGGTAAAACTTGAAGGTCTCA			BRAF	NM_004333	Body			TRUE					0.872948	0.888963	0.0160155	444	536	980
cg04196933	0.232524	3.28696	3.4007	0.00105237	0.999978	-1.32102	chr5	178195556	-	44646387	59606307	CTAAACACCAACTTCCAAAAAAAACCTACATATCACTTCATATAATATCA	CTAAACGCCGACTTCCGAAAAAAACCTACATATCACTTCGTATAATATCG	I	C	Grn	NA	NA	NA	NA	NA	NA		OpenSea	CTAATTAGGGATCTAAGCGCCGGCTTCCGAGGAGGGCCTGCATGTCACTTCGTGTGGTGT[CG]CCGGCCCTCCCGCTGTGAGATGGAAATGGCTCGCCTGCTCTGTGCCCCACTACGCTTCAT	CTAAGCGCCGGCTTCCGAGGAGGGCCTGCATGTCACTTCGTGTGGTGTCG			AACSL	NR_024035	Body				5:178128129-178128196				0.910702	0.89657	0.0141321	369	612	981
cg11522747	0.21692	2.13955	3.24998	0.00169082	0.999978	-1.63611	chr17	21795636	+	50703456		AAAATTTCRCRATTTACTCCTAAAACTCTACCTAACRTTTCTTCAAACTC		II			NA	NA	NA	NA	NA	NA		OpenSea	CTGTCTTCTCCGTGGGATCCACAGGATAGTCCGAGGATCCTAGGAGAGGGCAGATGTGAG[CG]AGCCTGAAGAAACGTCAGGCAGAGCCCCAGGAGTAAACCGCGAAATCCCTAGGGATCCAA	GGATTTCGCGGTTTACTCCTGGGGCTCTGCCTGACGTTTCTTCAGGCTCG									17:21719377-21720073				0.820476	0.799929	0.020547	582	399	981
ch.13.1084609F	0.244801	-3.36012	3.38339	0.00111203	0.999978	-1.3577	chr13	74427480	+	22713337		AAATCATCACACACATAAACCAAACCAAAATTTCAAAATAACAATCAACT		II			NA	NA	NA	NA	NA	NA		OpenSea	ATTTACCAGGACTTTCATAAATCATATTATTTACCTGAAGCAAATCAGAATCTATGTTTA[CA]GCTGACTGCTACTCTGAAACTCTGGTTTGGCCCATGTGTGTGATGACTTTAGGTTGGTGT	CAGCTGACTGCTACTCTGAAACTCTGGTTTGGCCCATGTGTGTGATGACT			KLF12	NM_007249	Body								0.0958789	0.0810537	0.0148252	394	588	982
cg13065735	0.18177	1.7993	3.26324	0.00162261	0.999978	-1.60878	chr1	180868449	+	63706317		ACTAACTCCCTCTTAAAAACCCTATAACCCCAAACTATACAACCATATCC		II			NA	NA	NA	NA	NA	NA		OpenSea	CTTCAGCAGAATCCCCCAGGCTGGTGGACGCAGGAGGGAGCGAGGAGGCAGGAGTCCCCA[CG]GACATGGCTGCACAGCCTGGGGCCACAGGGCTTCCAAGAGGGAGCCAGTCTGCAGCAGAA	CGGACATGGCTGCACAGCCTGGGGCCACAGGGCTTCCAAGAGGGAGCCAG								TRUE					0.782536	0.763063	0.0194724	554	428	982
cg13341941	-0.224816	2.01099	-3.23162	0.00178972	0.999978	-1.67382	chr4	69187090	+	28702364		TATCATATTTTATACCRATCRTAAATACACTCCCCAAACTACAAAAAAAC		II			NA	NA	NA	NA	NA	NA		OpenSea	GTTGCATCTACAATAAATAATACTAAGAAAATTAAAAGCTGGTTTAAAAAATAAACATAC[CG]CTTTCCTGTAGTTTGGGGAGTGCATTTACGACCGGTATAAAACATGATAGTAACAGTTCA	CGCTTTCCTGTAGTTTGGGGAGTGCATTTACGACCGGTATAAAACATGAT			YTHDC1;YTHDC1	NM_001031732;NM_133370	Body;Body			TRUE					0.791076	0.813081	0.0220056	622	361	983
cg02395917	0.31694	2.54517	3.19024	0.00203274	0.999978	-1.75825	chr8	139613712	-	64712439	26799413	AAACAAACAAAAATAAACTAAAAATACCTAAAACATCCATATCCATATCA	AAACAAACGAAAATAAACTAAAAATACCTAAAACGTCCATATCCGTATCG	I	T	Red	NA	NA	NA	NA	NA	NA		OpenSea	CAGGACCATGGAAAACAAGCGGGGGTGGGCTGGGGGTGCCTGGGACGTCCATGTCCGTGT[CG]TGCAACAGTGTGACAGCGTGAGGCTGACCAAACGCAGGATTGTGGGCAAACGAGACGCAT	AAACAAGCGGGGGTGGGCTGGGGGTGCCTGGGACGTCCATGTCCGTGTCG			COL22A1	NM_152888	Body				8:139682879-139682981				0.858985	0.833324	0.0256611	718	265	983
cg00517261	0.184902	-0.809596	3.14	0.00236927	0.999978	-1.85973	chr12	323801	+	16609436		AACCTTACCTAAAAACCACAAAAAACAAATACTTAATAAAAAACTCCAAC		II			NA	NA	NA	NA	NA	NA		OpenSea	GAGAACCTTGGGAGGGGAGGTGACCTCACTGACGAGGGCAAGGGAGGAGGGTGAATCACA[CG]CTGGAGTTTTCCACCAAGTACCTGCCCTCTGTGGCTTCTAGGCAAGGCCCTGGACCTTCA	CGCTGGAGTTTTCCACCAAGTACCTGCCCTCTGTGGCTTCTAGGCAAGGC			SLC6A12;SLC6A12;SLC6A12	NM_001122847;NM_001122848;NM_003044	TSS1500;TSS1500;TSS1500								0.375805	0.344106	0.0316991	829	154	983
cg01173485	-0.223592	2.03493	-3.22095	0.00184964	0.999978	-1.69567	chr11	74302893	+	53753423		CCTAATATCACCCCCRCAAAAATCTTTAATAATTAACTTCAACATAAACC		II			NA	NA	NA	NA	NA	NA	chr11:74303529-74304040	N_Shore	AGTAAGTCTGACTCTAGAGCCCACTCTCTTACGCACTACACCTGCGATACTGAACTGCAC[CG]GCTTATGCTGAAGTCAATTATTAAAGATTTTTGCGGGGGTGATACTAGGAGAAATTTGAG	CGGCTTATGCTGAAGTCAATTATTAAAGATTTTTGCGGGGGTGATACTAG			POLD3	NM_006591	TSS1500		CDMR						0.793529	0.816142	0.0226137	640	344	984
cg01498219	-0.298958	2.16412	-3.13925	0.00237469	0.999978	-1.86124	chr7	2812373	-	26686390		AAAACRTAAACTAACTATCCCACACTACTAAAAAAACTATAAACCAATAC		II			NA	NA	NA	NA	NA	NA		OpenSea	AAGTGTTGGTTAGAACGTGGACTAACTGTCCCACACTGCTGGAGAGACTATAAACCAGTA[CG]GCCAGTTTGGAGAAATAGTTGGCAAACCCAGCAATCCCACTCCTAGGTATATTTCCAAGA	GAACGTGGACTAACTGTCCCACACTGCTGGAGAGACTATAAACCAGTACG			GNA12	NM_007353	Body			TRUE					0.80201	0.833841	0.0318302	832	152	984
cg01239112	-0.30258	1.22902	-3.10356	0.00264512	0.999978	-1.93261	chr7	77669957	-	25713441		RTAAAACAACRAAACTCAACTCTAAAAACRCRAAATAACTTCTAAAAACC		II			rs3779337	0.06298	NA	NA	NA	NA	chr7:77669670-77670057	Island	CGCAGGTAGACGTAGAGCAGCGGGGCTCAGCTCTGGAAGCGCGGGATGACTTCTGGGAAC[CG]CACCCGGGGCAGGTCACCTCGCCTTGGAGACAGCCCTGAGTCAGGTCAGGTGGCAATCGG	TAGAGCAGCGGGGCTCAGCTCTGGAAGCGCGGGATGACTTCTGGGAACCG			MAGI2	NM_012301	Body				7:77507607-77507993	7:77669373-77670322	Unclassified		0.682631	0.723004	0.0403725	919	65	984
cg01518591	0.166022	1.56285	3.2226	0.00184022	0.999978	-1.69228	chr6	29408229	-	39668347		CRCTACCCACTACTACTAAACCACCRAATATATCTACAACTAACTAAATC		II			rs17177646	0.028541	NA	NA	NA	NA		OpenSea	GTGAACCCCTCCGCTACCCACTGCTGCTGAGCCACCGGGTGTGTCTACAGCTAGCTGGGT[CG]GCGTGGGCCTGTGGGGTGCTGGTGGGGCTGGGCCACACCCCTTTCATCTTCTCTTTGCCC	GCTACCCACTGCTGCTGAGCCACCGGGTGTGTCTACAGCTAGCTGGGTCG			OR10C1	NM_013941	1stExon								0.754141	0.731797	0.0223442	636	349	985
cg15653282	0.436328	-4.37348	3.54107	0.000668621	0.999978	-1.01897	chr18	11689218	-	55652489	16686367	ATTTACAATAACAAAAACCAACTATATTTACAATAACAAAAACTAAACCA	ATTTACGATAACGAAAACCAACTATATTTACGATAACGAAAACTAAACCG	I	A	Red	NA	NA	NA	NA	NA	NA	chr18:11689061-11690108	Island	CTGGGCGGCAGTATTTACGGTAACGAAAGCCAGCTGTATTTACGGTAGCGAGGGCTGGAC[CG]GCGGCGGCATTTACGGTAACGGGGGCCGGGCTCGCGGAGGCCCGTCGGTTCGGTCCGCTC	ATTTACGGTAACGAAAGCCAGCTGTATTTACGGTAGCGAGGGCTGGACCG			GNAL;GNAL	NM_182978;NM_182978	5'UTR;1stExon	high-CpG:11679188-11679290		TRUE	18:11678945-11680146	18:11689042-11689263	Unclassified_Cell_type_specific	TRUE	0.0528866	0.0416737	0.0112129	235	751	986
cg09990454	-0.223402	3.03188	-3.39531	0.00107062	0.999978	-1.33245	chr6	31616671	+	66677421		TATTCACATCAACATAAAACAAACCCCRATTCAAATATTAAAAAACCTCC		II			NA	NA	NA	NA	NA	NA	chr6:31619856-31620525	N_Shelf	TCTCAGCCAGGTCCACCCCACCTCCCAGCCTCCTTCTCCCAGATCCCCTTCCCTGACCCT[CG]GAGGCCCCTCAATACCTGAATCGGGGCCTGTTCCATGTTGATGTGAACATCCACAGCAGA	CGGAGGCCCCTCAATACCTGAATCGGGGCCTGTTCCATGTTGATGTGAAC			BAT3;BAT3;BAT3;BAT3	NM_004639;NM_080702;NM_080703;NM_001098534	Body;Body;Body;Body								0.884335	0.898607	0.0142719	380	606	986
cg07008962	-0.236094	2.66945	-3.30652	0.00141752	0.999978	-1.51905	chr6	138478542	-	36749415		TTATTAAAACAACTTAACCTTTCCATCAAATAACATATACATATTACATC		II			NA	NA	NA	NA	NA	NA	chr6:138482534-138483710	N_Shelf	TTGTTGGGTCTTTGTTAAAACAACTTAGCCTTTCCATCAAATAACATGTACATGTTGCAT[CG]TACTGAAGTTATTGATTGTTACGAGGAAAGTACTCATTAAATTATATGAACTCAGGAACA	CGATGCAACATGTACATGTTATTTGATGGAAAGGCTAAGTTGTTTTAACA													0.855972	0.873037	0.0170655	486	501	987
cg03894242	0.174833	2.9639	3.49199	0.000784554	0.999978	-1.1255	chr12	57513121	-	15654467		TTAAATAAATTCTCCCCCAACTACTTTTCATAATTCCTTTCTTAATCTTC		II			NA	NA	NA	NA	NA	NA		OpenSea	GTTAGCCATTCTTGAGTAAGTTCTCCCCCAACTACTTTTCATGATTCCTTTCTTGGTCTT[CG]GCCTACCTCTCTGCGTCCTCCCTCTCAGTCTCCTGTCTTCACGGGACACTCTTTCTGTGT	TGAGTAAGTTCTCCCCCAACTACTTTTCATGATTCCTTTCTTGGTCTTCG								TRUE					0.88991	0.877803	0.012107	276	712	988
cg06254525	-0.165103	2.60815	-3.42574	0.000971375	0.999978	-1.26772	chr10	1205641	-	74787442	60649493	AACACAAACACAAACCTACACACAAAACTTTAAACAAATAAAAAATAACA	AACGCAAACACAAACCTACGCGCAAAACTTTAAACAAATAAAAAATAACG	I	C	Grn	rs12569517	0.023766	NA	NA	NA	NA	chr10:1205562-1205859	Island	CAGATGAGGGATGGCGCAAGCACAGGCCTGCGCGCAGGGCTTTAGGCAGATGAGGGATGA[CG]CAGGCACAGGCCTGAGCGTCGCACGCTTTGCGTAGATGAGGGATGGCGCCGGCGCAGGCC	GGCGCAAGCACAGGCCTGCGCGCAGGGCTTTAGGCAGATGAGGGATGACG			NCRNA00200	NR_015376	TSS200				10:1195097-1195852	10:1205437-1205651	Unclassified_Cell_type_specific		0.853331	0.86672	0.0133885	343	646	989
cg26292028	0.197465	1.75802	3.21148	0.0019044	0.999978	-1.71501	chr12	109878728	+	12620356		TACCTACAATTATCTTAAACATTTCAAAACATAAAACTAACATAACCCCC		II			NA	NA	NA	NA	NA	NA		OpenSea	GGTGGGTGTAAGAGTGGGTCCTGAGTGTCAGTCCTCCTCATCCACCATTTCACCTATAAG[CG]GGGGTCATGCTAGTCCCATGCTTTGAAATGTTCAAGATAATTGCAGGTAGACCTGCAGAG	CGGGGGTCATGCTAGTCCCATGCTTTGAAATGTTCAAGATAATTGCAGGT		TRUE	MYO1H	NM_001101421	Body								0.778519	0.755575	0.0229444	656	335	991
cg08615567	0.247569	-1.37199	3.12355	0.00249028	0.999978	-1.8927	chr10	125651621	+	46606357		CTCTAATTTACTTTAAAACCCTAAACCAATCTTTTCTTCTCTCAAATCAC		II			NA	NA	NA	NA	NA	NA	chr10:125650820-125651373	S_Shore	TCAATCTTAGAAGAAAACACTGAGGCCCGCTGTTCCATTCCTGTTTTACAGGTGGAGAAA[CG]TGACCTGAGAGAAGAAAAGATTGGCCCAGGGTCCTAAAGTAAATCAGAGCCCAAGCAGCC	CGTGACCTGAGAGAAGAAAAGATTGGCCCAGGGTCCTAAAGTAAATCAGA			CPXM2	NM_198148	TSS200								0.293897	0.259142	0.0347555	871	120	991
cg01180513	0.384119	-3.75681	3.3195	0.00136095	0.999978	-1.49199	chr20	3388407	-	66797384	34797468	AAACATAAAAAAAACACACACACCAAAAACAAATAAAAACATTAAAAACA	AAACGTAAAAAAAACGCGCGCACCGAAAACGAATAAAAACGTTAAAAACG	I	A	Red	NA	NA	NA	NA	NA	NA	chr20:3387965-3388901	Island	GGGCGGGGGCGGGGGCGTGGAGGGGGCGCGCGCACCGAGAGCGGATGGGGGCGTTGGGAG[CG]GCTGGAGTTGGGGGTCGGCGCACGGCCACAGGGACCCCACTTCTTAAGCTGCGAGGCCGC	GGGCGTGGAGGGGGCGCGCGCACCGAGAGCGGATGGGGGCGTTGGGAGCG			C20orf194	NM_001009984	TSS200	high-CpG:3336219-3336600			20:3335259-3336901				0.0781258	0.0619523	0.0161734	465	527	992
cg12968258	0.169575	1.90373	3.24535	0.00171529	0.999978	-1.64564	chr11	57126602	-	58636491		AACACACAAAAATAAACAAAATAAAAAACCRTCACCACTATAAACCTACC		II			NA	NA	NA	NA	NA	NA		OpenSea	ATGGGAGTCGAGGCACACAGGGATGAACAAAGTGGGAAGCCGTCACCACTGTAGACCTGC[CG]CCCCCGCGGGAGGAATGGGAGCCTGGTTTTGAGCTGGGGTGCCTGACAGGAGCAGCAGTC	GCACACAGGGATGAACAAAGTGGGAAGCCGTCACCACTGTAGACCTGCCG			P2RX3	NM_002559	Body			TRUE					0.795435	0.774731	0.0207038	599	394	993
cg03354772	-0.425681	-2.95377	-3.14907	0.00230489	0.999978	-1.84149	chr10	134756503	-	57798493		CCATTCAATCAATCAATCAATCAATCAATCAATCATTCCTTCATTCTTTC		II			rs74369280	0.035224	NA	NA	NA	NA	chr10:134755663-134756852	Island	CATTCATTCATCCATTCAGTCAGTCAGTCAGTCAGTCAGTCAGTCATTCCTTCATTCTTT[CG]TTCTTTCATTCATTCCGTCATTACTTTAACAGGCGGTGATTTGCCCCTGCCACGGTGCTG	CATTCAGTCAGTCAGTCAGTCAGTCAGTCAGTCATTCCTTCATTCTTTCG		TRUE	C10orf93	NM_173572	TSS1500							TRUE	0.110696	0.139608	0.0289121	801	192	993
cg24999588	0.204881	0.319789	3.12206	0.00250154	0.999978	-1.89568	chr8	61839426	-	21663498		TATTCATACCCCATCCTATTAAACATACAACAAATACTTCTCAATATACC		II			NA	NA	NA	NA	NA	NA	chr8:61834699-61835871	S_Shelf	ATCCTCAGGGGTGTTCATGCCCCATCCTGTTGGGCATGCAGCAGGTGCTTCTCAGTATGC[CG]TGGTCCAGTGCTTTATACTGCCCACTTTTTGGAGGTCATCCGTGGTGCTGGGCTGTAGCT	CGGCATACTGAGAAGCACCTGCTGCATGCCCAACAGGATGGGGCATGAAC										8:61838726-61839726	Unclassified_Cell_type_specific		0.567145	0.532839	0.0343068	874	122	996
cg12763828	-0.182744	-3.06207	-3.54029	0.000670341	0.999978	-1.02068	chr1	9129646	+	60787425		ACATAACCAAAATACACCCAAAATATCTTCTCTCTCCATTCAATACACRC		II			NA	NA	NA	NA	NA	NA	chr1:9131602-9131909	N_Shore	GTTGCTCCATGCTTGCTCTGGAAGGGCAGAGTGCCGCTCACCTCCTTTTAGCCAAAGTAA[CG]CGTGCACTGAATGGAGAGAGAAGACATTCTGGGTGCACTTTGGCCATGCCAAATAACAGC	CGCGTGCACTGAATGGAGAGAGAAGACATTCTGGGTGCACTTTGGCCATG			SLC2A5;SLC2A5;SLC2A5;SLC2A5;SLC2A5	NM_003039;NM_001135585;NM_003039;NM_001135585;NR_024180	5'UTR;5'UTR;1stExon;1stExon;Body	low-CpG:9051939-9052394		TRUE		1:9129596-9130487	Unclassified		0.103851	0.114841	0.0109903	238	761	999
cg23110286	-0.158361	2.53999	-3.44273	0.000919809	0.999978	-1.23142	chr8	141630685	-	60709341		ACATTTAAATTTTTCCACAATAAAAAACCCTTTAAAACTTCTTCTCRACC		II			NA	NA	NA	NA	NA	NA		OpenSea	CACTTTTATGTACATTTGAATTTTTCCACAATAAAAAGCCCTTTAAAACTTCTTCTCGGC[CG]GGCACGGTGGCTCATGCCTGTAATCCCAGCACTTTAGGAGGCTGAGGCAGGCAAATCACT	CGGCCGAGAAGAAGTTTTAAAGGGCTTTTTATTGTGGAAAAATTCAAATG			EIF2C2;EIF2C2	NM_012154;NM_001164623	Body;Body			TRUE					0.847738	0.86074	0.013002	331	668	999
cg17958423	0.244091	-2.90197	3.27953	0.00154238	0.999978	-1.57511	chr11	6947583	-	13796510	12658501	CAACACCAAAAATATAACACTCATTTCTTTAAACCACTAAAAACTCACCA	CAACGCCGAAAATATAACGCTCATTTCTTTAAACCACTAAAAACTCACCG	I	T	Red	NA	NA	NA	NA	NA	NA	chr11:6947520-6948212	Island	GACGGGATGAGGCAGCGCCGGAAGTATGACGCTCATTTCTTTAAGCCACTAGAAGCTCAC[CG]TGAGTCCATTCACAGGGCCAGAGTTCCAAGTGTGCGGCGTGGGCGGGGCCTGCAGAAAGG	CGGTGAGCTTCTAGTGGCTTAAAGAAATGAGCGTCATACTTCCGGCGCTG			ZNF215	NM_013250	TSS200				11:6904097-6904842	11:6947217-6947985	Promoter_Associated	TRUE	0.126714	0.108474	0.0182405	530	469	999
cg05844871	-0.41778	-2.22347	-3.092	0.00273872	0.999978	-1.9556	chr6	32526342	+	35715467	36715502	CTAAAAAAATATTCACAAAATAAACACAATAAATACTATTAAAAAAACCA	CTAAAAAAATATTCACAAAATAAACGCGATAAATACTATTAAAAAAACCG	I	A	Red	rs11757886	0.283821	NA	NA	NA	NA		OpenSea	TCCTGGGAGCCTCCACCCTAAAGACACTCTCTGCTCCTTCTCTCATCCCACACGCTTTAC[CG]GTTCCTTCAACAGCACCCACCGCGTTCATCCTGTGAACACTTCCTTAGTGATAACCTTGT	CGGTTCCTTCAACAGCACCCACCGCGTTCATCCTGTGAACACTTCCTTAG			HLA-DRB6	NR_001298	Body								0.168304	0.212638	0.0443342	956	44	1000
cg07585502	-0.188623	2.8837	-3.39636	0.00106705	0.999978	-1.33023	chr8	101912084	-	64721363	41728496	AAAATAAAAAAATCTAACAAAATCCCTCTTCCAAAAACACAAACCAAACA	AAAATAAAAAAATCTAACGAAATCCCTCTTCCAAAAACGCGAACCAAACG	I	A	Red	rs4734017	0.278626	NA	NA	NA	NA		OpenSea	TGTCAGGCCAGCAGAGTGAGAGAGTCTAACGGGGTCCCTCTTCCAAGGGCGCGGGCCAGG[CG]AGTTATAGAGGAAGGTTGTTTTGCTTTGTTTTTGTTTTCTAATCTGGTGGAGAAGAGACA	CGCCTGGCCCGCGCCCTTGGAAGAGGGACCCCGTTAGACTCTCTCACTCT								TRUE	8:101981166-101981261				0.874525	0.888336	0.0138107	377	624	1001
cg16083168	-0.26573	2.64886	-3.23559	0.00176789	0.999978	-1.66568	chr11	75678837	-	55601484		AAACACCTAAATTTTCACATCTACTTCTACAATAAATCTATTACAATATC		II			NA	NA	NA	NA	NA	NA		OpenSea	AGCCTAATAAAAGACACCTGGATTTTCACATCTGCTTCTGCAGTGAATCTGTTGCAATAT[CG]TAAGTCTCGCAGACTCTGGTAAACTCCATCATACACTTATGAGAAAATGAGAGTGGAAAA	GACACCTGGATTTTCACATCTGCTTCTGCAGTGAATCTGTTGCAATATCG			UVRAG	NM_003369	Body			TRUE					0.85209	0.873132	0.0210416	616	385	1001
cg08894593	-0.250676	-0.0241613	-3.0911	0.00274611	0.999978	-1.95738	chr16	88910841	+	33807405		CTACCAAACTCCTACTAAAATAAACRCTCAAAAAAACRACTAAAAAATCC		II			NA	NA	NA	NA	NA	NA	chr16:88908433-88908698	S_Shelf	GGCCAGGACTTTGCTCTAGAAGGAGAAGGGGAGGGCACCGCCTGGGGCTTTGGCTCTCCT[CG]GATCCTCCAGCCGTCTCCCTGAGCGCCCACCTCAGCAGGAGCCTGGTAGAAGCCAACACT	CGGATCCTCCAGCCGTCTCCCTGAGCGCCCACCTCAGCAGGAGCCTGGTA			GALNS	NM_000512	Body					16:88910831-88910992	Unclassified_Cell_type_specific		0.479136	0.524969	0.045833	962	39	1001
cg01358740	0.312118	-4.22163	3.5526	0.000643861	0.999978	-0.993814	chr2	241075901	-	24736415	48691369	TTTATCTTTACACTAACAAAAACAAACATCTACAACACCTCTAATAAACA	TTTATCTTTACGCTAACGAAAACGAACGTCTACAACGCCTCTAATAAACG	I	A	Red	NA	NA	NA	NA	NA	NA	chr2:241075403-241075916	Island	CGGCCACCGGCGTTTGTCTTTGCGCTGGCGAGGGCGGGCGTCTGCAACGCCTCTGATGGG[CG]GCCGGGCGGCCACGGGGAGAAAAGGCTGCCAGCAATGGGAGCAGTGCCTGCAGAGCACGC	TTTGTCTTTGCGCTGGCGAGGGCGGGCGTCTGCAACGCCTCTGATGGGCG			MYEOV2;MYEOV2	NM_138336;NM_001163424	TSS200;TSS200				2:240723796-240725257				0.0563851	0.0456124	0.0107727	226	776	1002
cg05995220	0.223389	-0.788715	3.12405	0.00248652	0.999978	-1.8917	chr20	55964998	-	10780447	42711401	AAAACAACAAAAACCACAAACAAAAACAAAAACACCAAAAACAAAAAACA	AAAACAACGAAAACCGCAAACGAAAACAAAAACGCCAAAAACGAAAAACG	I	A	Red	NA	NA	NA	NA	NA	NA	chr20:55964916-55965271	Island	CACGCGGGATGAAGGGCAACGGGGGCCGCAAGCGGGGGCAGGAGCGCCAGGAACGAGGAA[CG]AAGGGGGAAGGGAGGAAAGGACGCCCAGGCTTCCGGAAGACTCGGGGGTCCCATCCCCAC	AGGGCAACGGGGGCCGCAAGCGGGGGCAGGAGCGCCAGGAACGAGGAACG			RBM38;RBM38	NM_017495;NM_183425	TSS1500;TSS1500				20:55397657-55399354				0.380246	0.346557	0.0336883	870	133	1003
cg11118615	0.181031	2.32345	3.30772	0.00141221	0.999978	-1.51655	chr1	18703404	+	20706489		AAACCCAATAAATTCTAAACRATACAACRATACATAAAACCATTAAACTC		II			NA	NA	NA	NA	NA	NA	chr1:18703295-18703496	Island	CCTCCTGGACGGCAGCGCTGAGTTCGACGGGAAGGAGCTGGTGCTGGAGCGGGTTCCCGC[CG]AGCTCAATGGCTCCATGTATCGCTGCACCGCCCAGAACCCACTGGGCTCCACCGACACGC	AGCCCAGTGGGTTCTGGGCGGTGCAGCGATACATGGAGCCATTGAGCTCG			IGSF21	NM_032880	Body				1:18575909-18576059				0.838176	0.821848	0.0163273	483	521	1004
cg06898308	-0.238768	2.83245	-3.28752	0.0015044	0.999978	-1.55856	chr5	97761216	-	73808352		AACACAAATTATTTAAATATTTTAAACAAAAATACCTTTTTATAAAAACC		II			NA	NA	NA	NA	NA	NA		OpenSea	CTGTGGGGGTGGGCACAAATTGTTTAGATGTTTTGAACAAAGGTACCTTTTTATAAAAAC[CG]CATGTTGTACACAGCATTTCTTACCTTTCCCATGAACAACAAAGGCTCCCAAATAAAATA	GCACAAATTGTTTAGATGTTTTGAACAAAGGTACCTTTTTATAAAAACCG								TRUE					0.868564	0.885956	0.0173912	515	489	1004
cg10217292	-0.251923	2.76837	-3.24629	0.00171027	0.999978	-1.6437	chr5	1491600	-	59729457		RACAAAAAACAAAACAATAACRTAAAAACRTTTCACACTCAAATAAATCC		II			NA	NA	NA	NA	NA	NA	chr5:1489799-1490071	S_Shore	TTGTCTATAACGGCAAAGAACAGAACAGTGACGTGGGGGCGTTTCACACTCAGATGGGTC[CG]GGGGTAAATGTGGGGGGTGCAGGGGGAGGACTCTGAGTGAAGTCTTGGGCCGTGCGTCTT	GCAAAGAACAGAACAGTGACGTGGGGGCGTTTCACACTCAGATGGGTCCG			LPCAT1	NM_024830	Body				5:1544550-1544657	5:1491578-1491717	Unclassified_Cell_type_specific		0.862311	0.88245	0.0201392	595	410	1005
cg13483241	-0.218027	1.92665	-3.20084	0.00196772	0.999978	-1.7367	chr2	203999871	-	68670356	27633456	TAAAAACCAAAAATTATAATAAATCAAAATCACACCACTACACTAATACA	TAAAAACCGAAAATTATAATAAATCAAAATCGCACCACTACACTAATACG	I	A	Red	NA	NA	NA	NA	NA	NA		OpenSea	GTTGCATGAACCTAGGAGCCGGAGGTTGTAGTGAGTCAAGATCGCACCACTGCACTGGTG[CG]ACAGAGCAAGACCCTGTCTCAAAAAAAAAAAAAAAACTTAACTTTCCCTGAAAAAAACGA	CGCACCAGTGCAGTGGTGCGATCTTGACTCACTACAACCTCCGGCTCCTA			NBEAL1	NM_001114132	Body								0.781225	0.804546	0.0233208	684	321	1005
cg15467085	-0.247707	3.92746	-3.66047	0.000450628	0.999978	-0.755853	chr1	54049407	-	17622406		CAATAACAAATTCTCATTTTATCATTACCCACRTCACAAAAATATATTAC		II			NA	NA	NA	NA	NA	NA		OpenSea	CAACAGAATCTCAGTGACAGATTCTCATTTTATCATTACCCACGTCACAAGAATGTATTG[CG]AGGAGGAGGGGCCGGGAAAGTCGGTGCCTTAATCACTTACAGACCACGGAGGCCCCAGTC	CGCAATACATTCTTGTGACGTGGGTAATGATAAAATGAGAATCTGTCACT			GLIS1	NM_147193	Body			TRUE					0.933952	0.942947	0.008995	153	854	1007
cg26908825	0.19107	3.37131	3.53935	0.000672404	0.999978	-1.02273	chr6	1635818	-	47657476		AACTAACTTTAATAAAAACTTTAATAAAAACTCCRAAAACRACACTATAC		II			rs117147799	0.010851	NA	NA	NA	NA		OpenSea	GAAAATAATCAGGCTGACTTTGATGGGAGCTTTGGTGGGGACTCCGAGGGCGACACTGTG[CG]GCGACCCTTGGCAGGTGCTTTGTTTGCCGTCGGGGCCAGCCTCACTGACAAGGCTGAGGG	GCTGACTTTGATGGGAGCTTTGGTGGGGACTCCGAGGGCGACACTGTGCG			GMDS	NM_001500	Body				6:1580801-1580850				0.914971	0.904046	0.0109256	240	767	1007
cg13217260	-0.23752	-2.92683	-3.35763	0.00120674	0.999978	-1.41205	chr2	176981469	-	72802385		TACRACTCAAAACCATTTTCAAATCTCATTAACTTAATTATCATATAATC		II			NA	NA	NA	NA	NA	NA	chr2:176982107-176982402	N_Shore	CGAGAGGAGGCTGCGGCTCAAGGCCATTTTCAAATCTCATTGGCTTGGTTGTCATGTGGT[CG]GCAGAGGCATCCACAATTACACGGGGAATGTTTTCCTAGAGATGTCAGCCTACAAAGGAC	GCGGCTCAAGGCCATTTTCAAATCTCATTGGCTTGGTTGTCATGTGGTCG			HOXD10	NM_002148	TSS200		CDMR		2:176688904-176689739			TRUE	0.112788	0.1275	0.0147118	419	589	1008
cg12629285	-0.201067	2.87197	-3.39123	0.00108463	0.999978	-1.34111	chr2	161353287	+	69626366		AATAACCCAAAACAAAACATCCAACATTACTATTTCTAAAAATCTCCTTC		II			NA	NA	NA	NA	NA	NA	chr2:161349223-161350371	S_Shelf	ACATAAAATTCAAAACAGTATCTCTTAGGAAGAAGAAGGATGAAGTATTTAAGGAGGGGC[CG]AAGGAGACCTCTAGAAATAGTAATGTTGGATGTTTTGCTCTGGGTTATTGATAACATGAG	ATAACCCAGAGCAAAACATCCAACATTACTATTTCTAGAGGTCTCCTTCG													0.873469	0.887308	0.0138391	386	623	1009
cg16472904	0.2194	-1.03775	3.11678	0.00254176	0.999978	-1.90624	chr11	7597402	-	17648365		ATAAAAAACATAAAAAACTACTCTTCAAACTAAAAATTCCAAAAAACCCC		II			NA	NA	NA	NA	NA	NA		OpenSea	GGGCATGCGGCATGAGGGGCATGAAGGACTGCTCTTCAGACTGGGAGTTCCAGGAAACCC[CG]GAGGTGACCCCCAAGGGAACTGGGAAGGCCCAGGCAGTCACAAGCTGTGCATCTGCAAGT	CGGGGTTTCCTGGAACTCCCAGTCTGAAGAGCAGTCCTTCATGCCCCTCA			PPFIBP2	NM_003621	Body					11:7597231-7597450	Unclassified_Cell_type_specific		0.341609	0.307723	0.0338864	884	127	1011
cg19938922	-0.207576	3.14728	-3.44639	0.000909042	0.999978	-1.22358	chr22	47231861	+	73664357		AAACTCTTACCCTCATTAAAACAACTTTACTAAATATTATATTCTTAATC		II			NA	NA	NA	NA	NA	NA		OpenSea	GTATGTCAGGAGTGAATGGGCTGATATATTCAAAGTAATGCAAGGAAAAAAAAAACCTGC[CG]ACTAAGAATACAATACCCAGCAAAGCTGTCCTAATGAGGGCAAGAGTTTCCCAGACGAAA	AACTCTTGCCCTCATTAGGACAGCTTTGCTGGGTATTGTATTCTTAGTCG			TBC1D22A	NM_014346	Body	low-CpG:45610523-45610566							0.892723	0.905481	0.012758	327	687	1014
cg23265439	0.133898	1.9606	3.3638	0.0011834	0.999978	-1.39907	chr17	62074445	-	34797501	42721455	TTAAAACTCCATCCCTCAACAATCAAATCCTCTCTTTTTCATTATCCCCA	TTAAAACTCCATCCCTCAACGATCAAATCCTCTCTTTTTCATTATCCCCG	I	A	Red	NA	NA	NA	NA	NA	NA		OpenSea	GGACTGACTTCCTTGGAACTCCATCCCTCAGCGGTCAAGTCCTCTCTTTTTCATTATCCC[CG]GGGCGTAGTCTTATCTTTCTGCTCTCTTTCCATGGATACATTTTCACTTCCCAACAATGC	TTGGAACTCCATCCCTCAGCGGTCAAGTCCTCTCTTTTTCATTATCCCCG			C17orf72	NM_001164257	TSS1500								0.800157	0.785864	0.0142937	412	604	1016
cg26249834	0.178243	1.90559	3.25628	0.00165807	0.999978	-1.62313	chr14	52479816	-	51638500		ATCRTTTATCCCAAACAAAAATACACATTCAAATAAACTTCCATTAACCC		II			NA	NA	NA	NA	NA	NA		OpenSea	AAAATTGAAAAGTCGTTTGTCCCAGGCAAGAGTACACATTCAAATGAGCTTCCATTAACC[CG]GGAATCATGGGATTCATAAACCCATGTCATAACCTCAGGTTAGAGAAAAAGTCCCAGTTT	TCGTTTGTCCCAGGCAAGAGTACACATTCAAATGAGCTTCCATTAACCCG			NID2	NM_007361	Body			TRUE					0.794781	0.776192	0.018589	564	452	1016
cg07871442	0.312594	-2.98348	3.21559	0.00188043	0.999978	-1.70662	chr5	171057196	-	73710431	47700490	ACCATCATCCAAACACAAAACTAAATAAACATAAACAACCCTTCCCAACA	ACCGTCATCCAAACGCAAAACTAAATAAACGTAAACAACCCTTCCCAACG	I	C	Grn	NA	NA	NA	NA	NA	NA	chr5:171057071-171057340	Island	AGCCCGGGGCGGGCCGTCATCCAGGCGCAGGGCTGGGTGGGCGTGGGCAGCCCTTCCCAG[CG]CCTCTGTCTGGGTGGAGCGGCAGGTTGGAGTTGCAGCGGCGTCTCCCTCATTTCCATAAG	GCCGTCATCCAGGCGCAGGGCTGGGTGGGCGTGGGCAGCCCTTCCCAGCG								TRUE	5:170989683-170989945	5:171056486-171058001	Unclassified_Cell_type_specific	TRUE	0.123805	0.10193	0.0218748	650	367	1017
cg10196290	0.332329	-2.70693	3.18829	0.00204492	0.999978	-1.76221	chr1	212587951	+	53730337	57655430	ACAAATACAAAACAAAAAATATCAAAACTACACAACAAAAAACTCTTCCA	ACGAATACGAAACGAAAAATATCGAAACTACGCGACAAAAAACTCTTCCG	I	A	Red	NA	NA	NA	NA	NA	NA	chr1:212587591-212588284	Island	TGCCCCTGGGCCGCTCCTCTGCACCCCGGGAGCCCTCCCCTGACGCACCCGTCGGTCCCT[CG]GAAGAGCCCTCTGCCGCGCAGCCCCGACACCCCCCGCCCCGCATCCGCCCAGGCCCCCGG	CGGAAGAGCCCTCTGCCGCGCAGCCCCGACACCCCCCGCCCCGCATCCGC			TMEM206	NM_018252	Body				1:210654031-210655031	1:212587948-212588739	Promoter_Associated		0.145974	0.121535	0.0244392	721	296	1017
cg06190547	-0.266998	-4.33825	-3.64986	0.000466855	0.999978	-0.779453	chr11	65488312	-	22725355	60705469	AACACTAAAACTAACACAAAAAACACACAAAACCTCTCAAAAAACCTCCA	AACACTAAAACTAACGCGAAAAACGCGCAAAACCTCTCAAAAAACCTCCG	I	C	Grn	NA	NA	NA	NA	NA	NA	chr11:65487660-65488348	Island	GGCTCGCGAGCTGACACTGAAGCTGGCGCGGAAAGCGCGCAGGACCTCTCAGGAAGCCTC[CG]CGGGGCCTCACGGGAAGCCGCCGCGGAGCTTCACGGGAAGTGTAGTCCCCTTACCCCCTA	GACACTGAAGCTGGCGCGGAAAGCGCGCAGGACCTCTCAGGAAGCCTCCG			RNASEH2C;RNASEH2C	NM_032193;NM_032193	1stExon;5'UTR	high-CpG:65244486-65244901			11:65243988-65244914	11:65486901-65488592	Promoter_Associated		0.044945	0.0538245	0.0088795	161	858	1019
cg14962049	0.179199	0.609757	3.13073	0.0024368	0.999978	-1.87833	chr5	145166924	+	66808338		ACTCCCCAAAAATCTCAAACCAAAAATTTCCAAACRCAAAACAAAAAAAC		II			NA	NA	NA	NA	NA	NA		OpenSea	AGCCTCCCCAGAGAAGCAAAATGTGGAATTTGTAAGCAACTATGTGGGGGTTCACCAAAA[CG]TTCTTTTGCTTTGCGTTTGGAAATTTTTGGTTTGAGATTTTTGGGGAGTGGGAAGCTAGC	CGTTCTTTTGCTTTGCGTTTGGAAATTTTTGGTTTGAGATTTTTGGGGAG			PRELID2;PRELID2;PRELID2	NM_205846;NM_138492;NM_182960	Body;Body;Body			TRUE					0.614509	0.583972	0.0305373	845	174	1019
cg18756771	-0.23906	0.166984	-3.10053	0.00266937	0.999978	-1.93864	chr10	112261994	-	58784415		AATAAAAAACAATAAAACTATTTTACTACCCTAAATCRAAATAAAACCTC		II			NA	NA	NA	NA	NA	NA	chr10:112257163-112258684	S_Shelf	AGCACCTTGGGAGTGAGAAGCAGTGAGGCTGTTTTACTGCCCTGAGTCGAAATGAAACCT[CG]TATCAGCCCCCATTTCCTTATAAATGGAGGAGGTTCCAGCTAGAATCCTGCTTAGAGCAG	CGAGGTTTCATTTCGACTCAGGGCAGTAAAACAGCCTCACTGCTTCTCAC			DUSP5	NM_004419	Body			TRUE					0.514445	0.553252	0.0388065	932	87	1019
cg26629730	0.118929	-0.0398877	3.23302	0.00178198	0.999978	-1.67095	chr22	43599560	-	47637484		RAAACCRTAACCTTACCTATAACTAAAAAAATTAACAAAACRTAAAACCC		II			rs114922639	0.013901	NA	NA	NA	NA		OpenSea	CGCAACAGCCCGGAGCCGTGGCCTTGCCTGTGGCTGGAGGAGTTGGCAAAGCGTGGGGCC[CG]CGGATGCCAGCACAGGCTCATCGACCTCCCCCAGACGGCGCCTTTGTCCCCTCCTCTCTC	CGGGCCCCACGCTTTGCCAACTCCTCCAGCCACAGGCAAGGCCACGGCTC			SCUBE1	NM_173050	3'UTR			TRUE					0.500529	0.480116	0.0204129	620	401	1021
cg16898822	0.27717	-1.9368	3.15745	0.0022469	0.999978	-1.82461	chr8	142626817	+	22660430		TAAAATAAAACAATAAAATATTTCCAAACAACACAAAAAACCAAAAACCC		II			NA	NA	NA	NA	NA	NA	chr8:142630127-142630468	N_Shelf	GCAGGGGGTGGGGTGTGTTTGGCCCCTGCTGTTTCGGCATTTCCTAGGCGTCACGAACCC[CG]GGCTCTTGGTTTCCTGTGTTGCTTGGAAACATCTCATTGTTCCACCTCAGGCTGCTGTGA	CGGGCTCTTGGTTTCCTGTGTTGCTTGGAAACATCTCATTGTTCCACCTC								TRUE	8:142695759-142696335				0.220398	0.193524	0.0268746	783	238	1021
cg16039960	0.238549	-3.49392	3.44567	0.000911176	0.999978	-1.22514	chr1	161369277	-	22655465	60637501	AACAAAACAAAACCACAACACAATACCTAATAATATCAAAAAATCTCACA	AACAAAACGAAACCGCGACACGATACCTAATAATATCAAAAAATCTCACG	I	A	Red	NA	NA	NA	NA	NA	NA	chr1:161368863-161369932	Island	GACACAAAAACTGACAGGGCGGAACCGCGACACGGTGCCTGATGATATCAAAAGGTCTCA[CG]GCTCCGGAGGGACCCAGTCGCCCACAGCCGCCAGGGGCGCCGCCGGCTCCGAGCCCGTTG	GACAGGGCGGAACCGCGACACGGTGCCTGATGATATCAAAAGGTCTCACG									1:159635488-159636062	1:161368650-161370319	Promoter_Associated		0.0875149	0.0749861	0.0125288	328	695	1023
cg04021014	0.144107	0.569733	3.21102	0.0019071	0.999978	-1.71595	chr22	49502115	+	48790329		CACAATTTAATTCTAAAAATATAACCCCAAAAAACTAACCTAAAAAACCC		II			NA	NA	NA	NA	NA	NA	chr22:49498162-49498377	S_Shelf	CTTCAGCACAGGCAGGGAGCCGTGGCGGATGCTCATTAACTCTGCCAGGGCCTGCATGGC[CG]GGCTCTTCAGGCCAGCTCCCTGGGGCTACATTCTCAGAACCAAACTGTGTTCCTCTTACC	CGGGCTCTTCAGGCCAGCTCCCTGGGGCTACATTCTCAGAACCAAACTGT													0.605036	0.583101	0.0219344	658	366	1024
cg26653867	0.204083	0.962498	3.1294	0.00244663	0.999978	-1.88099	chr1	3037655	-	36760452		TTTCTCCCCCTTTCTTTCTATCRTATAAAAAAATACTTTAATTAAAACCC		II			rs876740	0.381888	NA	NA	NA	NA	chr1:3038067-3038343	N_Shore	TGAGCGTGTGGTTTCTCCCCCTTTCTTTCTGTCGTGTAGGAAAATGCTTTAGTTAGGGCC[CG]GCTTGGAGGCAGGGCTGAGGAGTCAGCGGAGGCTGAGGCCAGAGGACAGCTTGCCCGTCA	CGGGCCCTAACTAAAGCATTTTCCTACACGACAGAAAGAAAGGGGGAGAA			PRDM16;PRDM16	NM_022114;NM_199454	Body;Body				1:3027487-3027701				0.670601	0.64008	0.0305208	850	175	1025
cg14966901	0.153438	1.15077	3.21381	0.00189079	0.999978	-1.71026	chr1	3100143	-	35633502		TAAAACRAATTTTTCCTAAAAACTATAAACAATCRCTTAACCCCRTAACC		II			NA	NA	NA	NA	NA	NA	chr1:3102540-3103352	N_Shelf	GGACAGCAAAATGAGACGGGTTTTTCCTGGAGGCTGTGGGCAATCGCTTAACCCCGTGAC[CG]CCGGGGAAGGGAGGCCGGGGGCCCAATGCACAGGCCTGCCTTTAATCAGCAGGAAACACT	GAGACGGGTTTTTCCTGGAGGCTGTGGGCAATCGCTTAACCCCGTGACCG			PRDM16;PRDM16	NM_022114;NM_199454	Body;Body				1:3089959-3090137				0.69648	0.675034	0.0214464	652	374	1026
cg03826200	-0.186387	3.1137	-3.49968	0.000765197	0.999978	-1.10886	chr19	45515559	+	32698401		TAAATACATATAAATAACTCCRAAATACAAAAAAAACCCCAATCCCACCC		II			rs187374471	0.011	NA	NA	NA	NA	chr19:45515163-45515560	Island	AGCACCGAGGCCAGCAAGACGCTGCCCGCCATCGAGGTGGGCCCGGCGAGCGGCCCCGGG[CG]GGTGGGACTGGGGCTTCCCCTGCACCCCGGAGCCATCCACATGCATTTATACGTTTATTT	AAATGCATGTGGATGGCTCCGGGGTGCAGGGGAAGCCCCAGTCCCACCCG			RELB	NM_006509	Body				19:50207041-50207400				0.891425	0.902574	0.0111486	273	755	1028
cg22495968	-0.217005	2.5384	-3.25337	0.00167317	0.999978	-1.62914	chr2	5622155	-	70691497		TACAAATTACACACTAAAAACCTCAACCAATAAAAAACACAAATTAAATC		II			NA	NA	NA	NA	NA	NA		OpenSea	GTGCATGGTGCTGCAGGTTACACACTGAAGACCTCAGCCAGTGGAAAACACAGGTTAGGT[CG]TCAAAAGACTCTGGTTTGGTCAGTTGGAAAACTTTATATGTTTTGAATGAACATTTCTAG	CGACCTAACCTGTGTTTTCCACTGGCTGAGGTCTTCAGTGTGTAACCTGC								TRUE					0.844579	0.863127	0.0185477	574	454	1028
cg23791482	0.192821	1.59921	3.18131	0.00208911	0.999978	-1.77638	chr6	100658339	-	47603354		TACTCTCTTTCCATTATAAACTATAAAAAATACTACCCAAAAACTAATCC		II			rs80330228	0.032552	NA	NA	NA	NA		OpenSea	TTTGGGAATCTTGCTCTCTTTCCATTGTAAACTGTAAAAAATGCTACCCAGAAGCTAATC[CG]AAAGCCACATGGCCCTAGAGGGGTCTGTGGTAAGTAAAGGGAAATGTAGTCTAATATGTA	CGGATTAGCTTCTGGGTAGCATTTTTTACAGTTTACAATGGAAAGAGAGC								TRUE					0.759197	0.734732	0.0244651	734	294	1028
cg12352403	-0.19333	2.41009	-3.28543	0.00151424	0.999978	-1.56289	chr2	202797851	+	40650358		CATTCTAAACATCAATACTACRATTTTAAACACCAAACATAACCATCCCC		II			NA	NA	NA	NA	NA	NA		OpenSea	TGCTATGGAGTGCATGCATGCCTGTGTGTGTGTGTGTGCGTGTGTGTGTAGGGAGGCATG[CG]GGGATGGCTATGTCTGGTGCCTAAAACCGCAGCACTGATGTCCAGAATGATTAATACAAG	CGGGGATGGCTATGTCTGGTGCCTAAAACCGCAGCACTGATGTCCAGAAT								TRUE					0.834076	0.850975	0.0168993	522	507	1029
cg05017628	-0.364231	1.51537	-3.08877	0.00276538	0.999978	-1.96201	chr19	48698632	-	42755403	71801350	TAACATAACACAATACCTTCACAACCTAATAACCATACAATAAACCAACA	TAACGTAACGCAATACCTTCGCGACCTAATAACCATACAATAAACCGACG	I	C	Grn	NA	NA	NA	NA	NA	NA	chr19:48697900-48698669	Island	CAGCCCCTCGCGTGGCGTGGCGCAGTGCCTTCGCGACCTGGTGGCCATGCAGTGGGCCGA[CG]CGGCCGGGGAGGCGGTGCCCGAGGGGCCCGATGGCGGGGGGCCTTGGCTGGAGGATGAGC	TGGCGTGGCGCAGTGCCTTCGCGACCTGGTGGCCATGCAGTGGGCCGACG									19:53389713-53390466				0.719572	0.761531	0.0419593	973	56	1029
cg13483696	0.272533	2.63365	3.16403	0.0022023	0.999978	-1.81133	chr3	15639924	-	55785462		CTCCATTCACAAACAAAACAATATACATAATACTTAAAAAATAAACTCTC		II			rs56959292	0.024703	NA	NA	NA	NA	chr3:15642770-15643581	N_Shelf	TACTAAACTACCTCCATTCACAGGCAGAACAGTGTACATGGTACTTAGAGAGTGGACTCT[CG]AGCCAATCTGTTTTGATTTAAATCCCAGCTTCCCCACTTTCTACTGTGTAATTTTGGCAA	TCCATTCACAGGCAGAACAGTGTACATGGTACTTAGAGAGTGGACTCTCG			HACL1	NM_012260	Body								0.867464	0.841772	0.025692	767	263	1030
cg03523550	-0.219275	-2.81706	-3.29538	0.00146785	0.999978	-1.54222	chr11	64001996	+	58695446	37641504	AAAAACTAAACCCAAACTAACAAACAAACAACTCATATAACCCAAACACA	AAAAACTAAACCCGAACTAACGAACAAACGACTCATATAACCCAAACACG	I	C	Grn	NA	NA	NA	NA	NA	NA	chr11:64001572-64002712	Island	CGACGGCCTCGCCCCCCCACCCCGCCGCCCCGCCCCCGCCCCACGGGCCGGTGGGGAGCG[CG]TGTCTGGGTCACATGAGCCGCCTGCCCGCCAGCCCGGGCCCAGCCCCCCGCCGCCCCCGC	GGGGGCTGGGCCCGGGCTGGCGGGCAGGCGGCTCATGTGACCCAGACACG			VEGFB	NM_003377	TSS1500	high-CpG:63758550-63758697			11:63758167-63759270	11:64001511-64002785	Unclassified	TRUE	0.120044	0.136257	0.0162131	506	526	1032
cg23794932	-0.191403	3.66033	-3.66345	0.00044616	0.999978	-0.749204	chr10	134512497	+	63670369	30809310	CAATACCAAAAACAAAACCAAAAACAAAAAACTAACCCACTAACACAACA	CGATACCGAAAACAAAACCGAAAACAAAAAACTAACCCACTAACACGACG	I	T	Red	rs78253684	0.02474	NA	NA	NA	NA		OpenSea	ATGGGGTGCTCCTGTCACCCTGTGGCTCGGCCTCCTCATCCGTCTTCCCAAGGCCAAGGA[CG]CCGTGTCAGTGGGCCAGCCTCCTGTCCTCGGTCCTGCTTCCGGCACCGCCCGTTTGCCTC	CGCCGTGTCAGTGGGCCAGCCTCCTGTCCTCGGTCCTGCTTCCGGCACCG			INPP5A	NM_005539	Body				10:134361709-134362559				0.922963	0.931277	0.00831355	152	881	1033
cg20229931	-0.233597	-1.42961	-3.11345	0.00256741	0.999978	-1.91288	chr21	47647656	+	70611472		TACATTCACTATTTTAACTTAAACTATATATAAAAAAAATTCCTCTAACC		II			NA	NA	NA	NA	NA	NA	chr21:47648191-47649622	N_Shore	GTAATTCTTCTGCAAAGAGATCGAAAAAAAAAAAAAGAGATAGCTGACGGGACTGTTGCC[CG]GCCAGAGGAACCCTCTTCACATACAGCCCAAGTCAAAACAGTGAATGTAAATTACTTTAA	CGGCCAGAGGAACCCTCTTCACATACAGCCCAAGTCAAAACAGTGAATGT			LSS;LSS;LSS;LSS	NM_001145436;NM_002340;NM_001001438;NM_001145437	Body;Body;Body;5'UTR		RDMR						0.261283	0.293793	0.0325094	890	145	1035
cg22814622	0.164709	2.94051	3.4096	0.00102289	0.999978	-1.30211	chr11	107621204	+	19759408		RACAAATCAACAAACCATCRACCRACAAAACATAAAATTTAAACAAAATC		II			rs57495756	0.201554	NA	NA	NA	NA		OpenSea	CAGAAGGGAGATGGTTTTCCCCTGGAATCTGGCCATTCAGCAGCGCAGGCTCTCCTCCTC[CG]ACCCTGTCCAAACTCCATGTTCTGCCGGTCGATGGCCTGCTGACCTGCCGGCGTCTGTCG	GCAGGTCAGCAGGCCATCGACCGGCAGAACATGGAGTTTGGACAGGGTCG									11:107126397-107126696				0.888551	0.875743	0.0128073	359	682	1041
cg05645927	-0.217074	3.17416	-3.42042	0.000988083	0.999978	-1.27907	chr6	27344393	-	20647400		CAAATAACAACATCTCTAAAATCCAATCTCTTCATACTTAAAATAAAAAC		II			NA	NA	NA	NA	NA	NA	chr6:27342437-27342779	S_Shore	TCTCTGTATTGCAAATGACAACATCTCTGGGATCCAGTCTCTTCATACTTAAAATAGAAA[CG]AAATCAGTTTCCACCCATTGATAAGGTATAACCTTATCAAGACCAGCCTGGCCAACATGG	CGTTTCTATTTTAAGTATGAAGAGACTGGATCCCAGAGATGTTGTCATTT			ZNF204P	NR_024553	TSS1500								0.894336	0.906883	0.0125472	348	694	1042
cg01370294	-0.227	2.94447	-3.36	0.00119772	0.999978	-1.40707	chr7	55414328	+	36765353		TTACCTTTACTCATCATTCTACACTACCAACTTTATCATAAATCAAATAC		II			NA	NA	NA	NA	NA	NA	chr7:55411965-55412772	S_Shore	GTATAGACAAATGGACCAAAGGAAACAATACAGAACAGAAACAAGACTCCCCTGGGCACA[CG]TACTTGACTTATGACAAAGCTGGCAGTGCAGAATGATGAGTAAAGGCAATAATGCTGGGC	TGCCTTTACTCATCATTCTGCACTGCCAGCTTTGTCATAAGTCAAGTACG	TRUE												0.878399	0.892171	0.013772	416	627	1043
cg27477373	0.255771	-2.63372	3.25425	0.00166859	0.999978	-1.62732	chr19	56879645	+	48692445	62608383	AATTTCTAAAAATAAACAAAAACTCACAATACACATATACAACCCCCACA	AATTTCTAAAAATAAACGAAAACTCGCAATACGCATATACAACCCCCACG	I	A	Red	NA	NA	NA	NA	NA	NA	chr19:56879417-56879995	Island	CCCAGGTAGCTCGTCTCTTAGCCATGTACGCCTCTGCATTCCGGTCACTGGGAGCGGGGC[CG]TGGGGGCTGCACATGCGCACTGCGAGTCCTCGCCTACTCCCAGAAACCACCCGGGCGCAT	GGTTTCTGGGAGTAGGCGAGGACTCGCAGTGCGCATGTGCAGCCCCCACG			ZNF542;ZNF542;ZNF542;ZNF542	NR_024056;NR_003127;NR_024055;NR_024057	TSS200;Body;Body;TSS200		DMR		19:61571181-61571790	19:56879238-56879773	Unclassified		0.147806	0.129755	0.0180501	571	472	1043
cg19019913	-0.318801	-4.09868	-3.45963	0.000871093	0.999978	-1.19519	chr11	34073162	-	44770332	29749462	AAACCAAAAAACAACAAAAAAACTAACAAACAACCTCTTCCAAACAAACA	AAACCGAAAAACGACGAAAAAACTAACGAACGACCTCTTCCGAACAAACG	I	T	Red	NA	NA	NA	NA	NA	NA	chr11:34072986-34074703	Island	CCCACAGCGCCGGGGCCGGGGGACGGCGGAGAAGCTAGCGGGCGGCCTCTTCCGGGCAGG[CG]TTCGCGCCGGGCAGCCCGAGCGGCCGCGAAGGCCCCCGCTCTCCGCTTCTCCCGCCCCTC	CGCCTGCCCGGAAGAGGCCGCCCGCTAGCTTCTCCGCCGTCCCCCGGCCC			CAPRIN1;CAPRIN1	NM_203364;NM_005898	TSS200;TSS200				11:34029563-34031695	11:34072746-34073979	Promoter_Associated		0.0527685	0.064409	0.0116405	311	733	1044
cg23092801	-0.227053	2.34004	-3.20061	0.00196911	0.999978	-1.73717	chr2	201139343	-	62711474		TAACCATTATTAAATCRATAAATCATTAATCAATTTCAATTACCTAACAC		II			NA	NA	NA	NA	NA	NA		OpenSea	TGGACTCTCACTGACCATTGTTAAATCGGTAAGTCATTAATCAATTTCAATTACCTGGCA[CG]ATGAGAGGGTGAGGTCTGAAAACTATTGTCATGGGTGATATGTGGTCTATGGTTTCTGAG	CGTGCCAGGTAATTGAAATTGATTAATGACTTACCGATTTAACAATGGTC								TRUE					0.824861	0.847006	0.0221447	686	358	1044
cg14145524	0.151555	1.98859	3.30371	0.00143009	0.999978	-1.52491	chr9	132310915	-	51756493	74600376	CATCCTACCTACTACTTTACTAAACTCAAAAAAAACCCTATCCCAACCCA	CGTCCTACCTACTACTTTACTAAACTCAAAAAAAACCCTATCCCAACCCG	I	C	Grn	rs75978278	0.038228	NA	NA	NA	NA	chr9:132312156-132312892	N_Shore	AAGGCAGCAGCACGTCCTGCCTGCTGCTTTGCTGGGCTCAGAGGAAACCCTGTCCCAGCC[CG]CCGGAAGGTGGTGACTTCCCGGGCTGCTGTGTCCAGAGGCAAGCGGCCAGGCTCCACCAG	CGTCCTGCCTGCTGCTTTGCTGGGCTCAGAGGAAACCCTGTCCCAGCCCG													0.803549	0.787891	0.0156574	487	558	1045
cg06335814	0.172038	-3.55665	3.70245	0.000391523	0.999978	-0.662041	chr18	30051251	-	46708324		CCTAACAATACRATAACTAAATACAAAACACAAAAAATACCTTTAATAAC		II			NA	NA	NA	NA	NA	NA	chr18:30050115-30051345	Island	TCCACTCCCATCCTGGCAATGCGGTGGCTAAATACAAGGCACAAAAGATACCTTTAGTGG[CG]CTCCCTCTTGCTTCCCGGTGACCCAGACTTTGGTCAGAAGAGTACCACAGCCCAACGGGG	CGCCACTAAAGGTATCTTTTGTGCCTTGTATTTAGCCACCGCATTGCCAG		TRUE	FAM59A	NM_022751	TSS1500				18:28304114-28305630				0.0817123	0.074031	0.00768128	136	910	1046
cg04372182	0.235841	3.52416	3.43459	0.000944194	0.999978	-1.24883	chr2	1625113	-	37742450		RACTCCAACAAAAAACACACCRATAAAACCCAACAATCAAACAAAATATC		II			rs9712143	0.311757	NA	NA	NA	NA		OpenSea	CAAACTGTCACGGCTCCAGCAGAGAACACACCGGTAAGGCCCAGCAGTCAGACAGGATGT[CG]TCACACCACCAACTCGGCAATGCTGGCTGATAAAACAGCCATCTCACCCTTTCTGGGGGT	GCTCCAGCAGAGAACACACCGGTAAGGCCCAGCAGTCAGACAGGATGTCG									2:1603992-1604193				0.923066	0.910904	0.0121619	335	711	1046
cg06367154	0.235247	-2.99484	3.30286	0.0014339	0.999978	-1.52668	chr7	1707338	+	66665382	13637451	CTAAAAAATTAAAACCTAAAAAACAACAAAATCCCAAAATTAACAAAACA	CTAAAAAATTAAAACCTAAAAAACGACGAAATCCCGAAATTAACGAAACG	I	A	Red	NA	NA	NA	NA	NA	NA	chr7:1703861-1710517	Island	GCCCAGCCCTCAGGCAGCGTGGGGATCTTTGTCCCCAGGGCCAGCGCCGGCCCCGCCCCC[CG]CCCCGTTAACTCCGGGACTCCGCCGCCCTCCAGGTTCCAACCTCCCAGCTTCACCGCCGC	CTGGGAGGTTGGAACCTGGAGGGCGGCGGAGTCCCGGAGTTAACGGGGCG						high-CpG:1673863-1673868			7:1670330-1674527				0.118981	0.103305	0.0156768	491	555	1046
cg14028447	-0.221575	2.72582	-3.25401	0.00166984	0.999978	-1.62782	chr1	95401503	-	42627337		CRTATTTAAAACCAAATAACAATAACTCATCTCTAAAATCCCAACATTTC		II			NA	NA	NA	NA	NA	NA		OpenSea	ATTTAGAAAACCGTGTTTAAGGCCAGGTGGCAGTGGCTCATCTCTGAAATCCCAGCATTT[CG]GGAAGCCAAGGCAGGTGGATCACTTGAGCCCAGGAGTTTGAGACCCACCTGGGCAACATG	GTGTTTAAGGCCAGGTGGCAGTGGCTCATCTCTGAAATCCCAGCATTTCG								TRUE					0.860375	0.878295	0.0179203	572	474	1046
cg20477084	0.201466	2.60526	3.28505	0.00151602	0.999978	-1.56367	chr18	76769175	-	17656438		ATATCTACACACTATCCATATATTCCATCTTCCTCATCAAAAAAACCCRC		II			NA	NA	NA	NA	NA	NA	chr18:76765747-76766833	S_Shelf	CTCCCTGGCCTGTGTCTGCACACTGTCCATGTATTCCATCTTCCTCATCAGAGGAGCCCG[CG]TGGCCCACTGCGGGATACTCACCTTGCCAACCGCTGTGGGCCAGGGTCGTGTTAACACCC	CGCGGGCTCCTCTGATGAGGAAGATGGAATACATGGACAGTGTGCAGACA									18:74870161-74870251				0.863284	0.847003	0.016281	523	524	1047
cg06449742	-0.336456	-4.11019	-3.41735	0.000997853	0.999978	-1.28562	chr17	79633586	+	50716389	70794308	AAAAATTACCAAATCCCATCCACAAACAATACTACTACAAAAAATAATCA	AAAAATTACCGAATCCCGTCCGCGAACGATACTACTACGAAAAATAATCG	I	A	Red	NA	NA	NA	NA	NA	NA	chr17:79633256-79634230	Island	CAAGACCCGTCCTGGTACTTGCCGAGCCACGGACCGCGGCGGCTACCGCCCGGCCTCCCT[CG]ACCACCCTCCGCAGCAGCATCGCCCGCGGACGGGATCCGGCAACCCCTGACCGTGAGCGG	AGGGGTTGCCGGATCCCGTCCGCGGGCGATGCTGCTGCGGAGGGTGGTCG			CCDC137;C17orf90	NM_199287;NM_001039842	TSS200;1stExon	high-CpG:77243978-77244091			17:77243533-77244635	17:79632717-79634208	Promoter_Associated		0.0523	0.0648067	0.0125067	351	699	1050
cg03673138	0.172701	0.939073	3.14115	0.00236099	0.999978	-1.85741	chr11	72385963	+	52734467		ACAACTAACTATACATAAAAACCTAATCTCTCAAACTTAAAAACACAAAC		II			NA	NA	NA	NA	NA	NA		OpenSea	GGGGCAGCAGACCCAGACCCTCTGCTGCCCCATCGCAGAAGCCTTCAGGATGAGGGGACA[CG]CTTGTGCCCTCAAGTCTGAGAGATCAGGCCTCCATGCACAGCTAGCTGCCCTCTCCTCTG	CGCTTGTGCCCTCAAGTCTGAGAGATCAGGCCTCCATGCACAGCTAGCTG			PDE2A	NM_002599	TSS1500								0.666336	0.638546	0.0277909	827	224	1051
cg22805485	0.208516	1.05672	3.10171	0.00265994	0.999978	-1.9363	chr11	13983818	-	69757432	64620374	AAAAACAATAAACCCAAAATCACCACATCTAACCCTACTATAACTAATCA	AAAAACAATAAACCCGAAATCGCCGCATCTAACCCTACTATAACTAATCG	I	C	Grn	NA	NA	NA	NA	NA	NA	chr11:13984066-13986349	N_Shore	TATGGCCTTGGGAAGAGCAATGGGCCCGGAGTCGCCGCATCTAACCCTGCTGTAACTGGT[CG]CAAGTCACAGTTTGCTCATCTATAAAGTGAGCGAAAGTAATGTAATCTTTATTGGGAGTA	AAGAGCAATGGGCCCGGAGTCGCCGCATCTAACCCTGCTGTAACTGGTCG			SPON1	NM_006108	TSS200								0.686023	0.652125	0.0338981	925	126	1051
cg16492833	-0.192726	-2.48849	-3.27627	0.00155811	0.999978	-1.58185	chr6	33679775	-	59712445		CRTCTCTTTTTCAATAACTACACAAACTTAAAACTAAAAAACCCTCCCCC		II			NA	NA	NA	NA	NA	NA	chr6:33679158-33679701	S_Shore	AGACAGCTTTGCGTCTCTTTTTCAATGACTGCACAAGCTTGAGACTAAAAAACCCTCCCC[CG]AGGCCTCCGCTGTTTTGCATAAACCAATATATTTGCATGTAAATACAGGTTACTGGATGA	CGGGGGAGGGTTTTTTAGTCTCAAGCTTGTGCAGTCATTGAAAAAGAGAC			C6orf125	NM_032340	TSS1500					6:33678990-33680036	Promoter_Associated		0.146692	0.163054	0.0163628	535	519	1054
cg27273675	-0.198525	-1.47285	-3.15119	0.00229013	0.999978	-1.83723	chr2	105911437	+	41617463		AAAAAAATACAAACCAAAAACAAATCRCCAATCCCAAACCTACCACTACC		II			rs77543735	0.036924	NA	NA	NA	NA		OpenSea	GACTTCCACACATCCACCGAGAGCAGCTTGCAGGAGAGGAGAAGGGGCTGAGAGCACATG[CG]GCAGTGGCAGGCCTGGGACTGGCGATCTGCCTCTGGTCTGCACCCTCCCCTCCAGGGCAC	CGGCAGTGGCAGGCCTGGGACTGGCGATCTGCCTCTGGTCTGCACCCTCC			TGFBRAP1;TGFBRAP1	NM_001142621;NM_004257	Body;Body					2:105910893-105911942	Gene_Associated	TRUE	0.257087	0.282929	0.0258421	797	258	1055
cg24290299	-0.198992	2.01196	-3.20243	0.00195813	0.999978	-1.73346	chr12	121813316	-	49711385		TTTTTTCRCTATTTAAAACCATATTACTTTTATAAACTATAACACTCACC		II			rs116258740	0.047894	NA	NA	NA	NA		OpenSea	GGGTGGTTTAGTTTTTTCGCTGTTTGGGGCCATATTGCTTTTATGAGCTGTGACACTCAC[CG]CGAAAGTCTGCGAAGCTTCATTCATGTAAGCCCCCGAGACCACGAACCTGCCGAGAGGAA	TTTTTCGCTGTTTGGGGCCATATTGCTTTTATGAGCTGTGACACTCACCG									12:120297699-120297940				0.791983	0.813071	0.0210878	678	384	1062
cg02471507	-0.258004	-3.73586	-3.324	0.00134184	0.999978	-1.48259	chr8	82644747	-	27769456		TAAAATATATATCACCTATCCAAAACRACTTATTAATTCCCAAAAAAACC		II			NA	NA	NA	NA	NA	NA	chr8:82644603-82644849	Island	AGGAAATGCCCTGGAGTGTGTGTCACCTGTCCAGGACGACTTGTTGATTCCCAGGAGGGC[CG]CCTTTCCGGTCTGGGTCCCCGAGAGGACTGCCTTGCTCACCTGTCCCCTCGGCGCGGCCC	CGGCCCTCCTGGGAATCAACAAGTCGTCCTGGACAGGTGACACACACTCC		TRUE	CHMP4C;CHMP4C	NM_152284;NM_152284	1stExon;5'UTR	high-CpG:82807218-82807313			8:82807114-82807505	8:82644347-82645281	Unclassified	TRUE	0.0663652	0.0806726	0.0143074	460	603	1063
cg12891342	0.189377	2.56399	3.29632	0.00146358	0.999978	-1.54029	chr11	58344244	-	41632479		TTTACTACTTACTATAATTACAAAATCTAAAATCTTTCCTCTACAACACC		II			rs73470723	0.011894	NA	NA	NA	NA	chr11:58345673-58347321	N_Shore	TAATTGGTAGCTTTGCTACTTACTATAATTGCAAAGTCTGGGATCTTTCCTCTACAACAC[CG]TAGCCTTCTTTACTTTTTTTAAGACAAGCTCTCTGTCACCCAGGCTGGCGTGCAAAGGTA	CGGTGTTGTAGAGGAAAGATCCCAGACTTTGCAATTATAGTAAGTAGCAA			LPXN;LPXN	NM_001143995;NM_004811	Body;TSS1500								0.859659	0.84421	0.0154482	505	563	1068
cg10809622	-0.210619	3.94947	-3.63042	0.000498049	0.999978	-0.822597	chr6	167511399	+	28668427	22781306	CACCCTATAAACATTTAAAAATAAACAAAACAAACACTTCACATACATCA	CACCCTATAAACATTTAAAAATAAACGAAACAAACACTTCGCGTACATCG	I	A	Red	NA	NA	NA	NA	NA	NA	chr6:167507434-167507730	S_Shelf	GGAGCTGCCCGAGCCCAGCGCTCAAGGCCCAGCCAGAACCGAACCAAGGCTGGCTGGGGC[CG]ATGCACGCGAAGTGCTTGTCCCGTTTACTTCTAAATGCCCACAGGGTGTTCATTAGACAG	CACCCTGTGGGCATTTAGAAGTAAACGGGACAAGCACTTCGCGTGCATCG									6:167431347-167431600				0.935568	0.943436	0.00786859	172	898	1070
cg03209809	-0.16037	-3.46572	-3.55794	0.000632667	0.999978	-0.982124	chr3	126422892	+	37624321		ACRATCTATACCTACTAAAATACRTTAAACTAAAACCRAAAATATATACC		II			rs79874786	0.025195	NA	NA	NA	NA	chr3:126422888-126423609	Island	GCTCCCAAAGCGAGAACGTGACCCTGTCCTGCACCCAGCCCTCCACTCCAGGGCCTCCGC[CG]GTACACATCTTCGGCCTCAGCCTAACGCACTCTAGCAGGCACAGACCGCCACGCCCCCAC	CGGTCTGTGCCTGCTAGAGTGCGTTAGGCTGAGGCCGAAGATGTGTACCG			CHCHD6	NM_032343	TSS1500				3:127905329-127906627	3:126422224-126423851	Promoter_Associated		0.0803067	0.0893168	0.00901012	217	853	1070
cg10388017	0.177992	2.70576	3.36892	0.00116433	0.999978	-1.38827	chr1	160856347	-	59641319		TTTCATATTTACAAACAACAACCTCTTAAAAATAAAAATCTCAACCAAAC		II			NA	NA	NA	NA	NA	NA		OpenSea	ACATACCCAGCTTTCATATTTACAAACAACAACCTCTTAGAAATAGAGGTCTCAGCCAGG[CG]CTGCGGCTTACACCTGTAATCCCAGCACTTTGAGGGGACGAGGGTGGCCAATCACTTGAG	CGCCTGGCTGAGACCTCTATTTCTAAGAGGTTGTTGTTTGTAAATATGAA			ITLN1	NM_017625	TSS1500								0.870789	0.857731	0.0130586	407	663	1070
cg19667304	-0.187575	-3.73422	-3.54567	0.000658634	0.999978	-1.00893	chr12	68043875	+	29603458		RAATCTTCCTTTATAACTACAACTTTAAACTCRCCCAACTTAACCAAAAC		II			NA	NA	NA	NA	NA	NA	chr12:68042166-68043876	Island	AGAAGAGGGGTCGAGATACAAGCAGCCCCACGCCTCGGGCCGATGGTCTCTCGTCGACGC[CG]CCCTGGTTAAGTTGGGCGAGCCCAAAGCTGCAGCCACAAAGGAAGATTCGTGGCGTGGGC	AATCTTCCTTTGTGGCTGCAGCTTTGGGCTCGCCCAACTTAACCAGGGCG			DYRK2;DYRK2	NM_006482;NM_003583	Body;5'UTR				12:66327912-66330427	12:68043548-68044723	Promoter_Associated		0.0672617	0.076556	0.00929434	231	841	1072
cg23819669	0.204783	1.58854	3.14238	0.00235221	0.999978	-1.85494	chr3	128187274	-	20807426	39711364	TCTCCCCCAAACAAACTAATAAAACCAATTAAACAACCAATTAATATTCA	TCTCCCCCGAACGAACTAATAAAACCGATTAAACAACCAATTAATATTCG	I	A	Red	rs76939711	0.053065	NA	NA	NA	NA		OpenSea	GTACCAGGAAGGTCTCCCCCGGGCGAGCTGATGGAGCCGATTAAGCAGCCAATTGGTATT[CG]GAGCAGCCAGAGGCCCCTCTCTGTCTCTGTAATTAATGGAGTGGCTTTTTAAAAGGATTC	TCTCCCCCGGGCGAGCTGATGGAGCCGATTAAGCAGCCAATTGGTATTCG			DNAJB8	NM_153330	TSS1500								0.758252	0.731932	0.0263202	822	251	1073
cg24024903	0.270091	-3.37258	3.31464	0.00138188	0.999978	-1.50213	chr10	830689	+	12784449	38791386	AAAACTCCCACACACAAAAAAACCAACAAAAAACCAACCAAAAATATACA	AAAACTCCCACGCGCAAAAAAACCAACGAAAAACCGACCAAAAATATACG	I	T	Red	rs11253442	0.323274	NA	NA	NA	NA		OpenSea	GGGGTCTGAACTCCCAGCCAAGCCCGGCCTCTGCACACAGCAGTGAGAAGCCAGGACCTA[CG]CACACCCCTGGCCGGCTCCCCGCTGGCCCCTCTGCGCGTGGGAGCTTCCAGCCTCCCGGG	CGCACACCCCTGGCCGGCTCCCCGCTGGCCCCTCTGCGCGTGGGAGCTTC									10:819728-821563	10:830610-830850	Unclassified_Cell_type_specific	TRUE	0.0953151	0.0809215	0.0143936	474	600	1074
cg20129082	0.187502	-2.60049	3.255	0.00166469	0.999978	-1.62577	chr11	19736150	-	38692309		CCAACTAAAACCRACAACTAAAAACTCCTAACRCCTTAACTAACTATTAC		II			rs74323708	0.023892	NA	NA	NA	NA	chr11:19733936-19735320	S_Shore	GTACTAGTGCACCAGCTGAGGCCGGCAGCTGGAGACTCCTAGCGCCTTGGCTGGCTGTTG[CG]GTGGGGGTGGGGGTGGAGGTGGCTGCCTCAGAATGGCGGCCGAAGCTAAGCCCCTCCTTC	CAGCTGAGGCCGGCAGCTGGAGACTCCTAGCGCCTTGGCTGGCTGTTGCG			LOC100126784;NAV2;NAV2;NAV2	NR_015384;NM_182964;NM_001111018;NM_145117	TSS200;Body;Body;Body					11:19736057-19736190	Unclassified_Cell_type_specific		0.149072	0.132126	0.0169464	568	506	1074
cg26344776	-0.197185	2.08354	-3.2022	0.00195949	0.999978	-1.73392	chr15	25487823	-	47637350		CAAAATAAAACTCTAATACCTAATCATACTACAAATCAACCTTAAAACTC		II			NA	NA	NA	NA	NA	NA		OpenSea	TGGGGTTGGGTCAAGGTGGAGCTCTGGTACCTGGTCATGCTGCAGGTCAGCCTTGGGACT[CG]TAAGCTTTGGGCCAAGGGACAGCTGGCATCCTGCTGGGGGGTCACCCTATCTCTGGGGTC	CGAGTCCCAAGGCTGACCTGCAGCATGACCAGGTACCAGAGCTCCACCTT			SNORD115-40	NR_003355	TSS1500								0.799955	0.820614	0.0206589	679	395	1074
cg17085123	0.196211	1.84252	3.19182	0.00202296	0.999978	-1.75505	chr1	54943133	+	71607500		TCCRATACACACCTACTTATTAAACTATACAAACRTTTAAACTACAAAAC		II			NA	NA	NA	NA	NA	NA	chr1:54940346-54940753	S_Shelf	TGCTTCAGCCCCTTGGGCAGAATGAGTTCCTGTTTCCTGAAGGCATCTGGGCTTTCTGTG[CG]TTCTGTAGCTCAAACGTTTGCATAGTTTAATAAGCAGGTGTGTACCGGACCAGTGGATGT	CCGGTACACACCTGCTTATTAAACTATGCAAACGTTTGAGCTACAGAACG										1:54942760-54943384	Unclassified_Cell_type_specific		0.788317	0.766344	0.0219727	711	363	1074
cg26223555	-0.178512	3.40929	-3.49973	0.00076507	0.999978	-1.10875	chr19	52327441	-	24775479		ACCTAAACCCAAAACCATCRCACCATAAATCTAACCAAAAAAATAATAAC		II			NA	NA	NA	NA	NA	NA		OpenSea	TCCTGCATCCAGCCTGGGCCCAGAACCATCGCACCATGAGTCTGGCCAAGAGGGTGATGA[CG]GGACTCTGGATTTTCACCATAGTCCTTACCTTACCAAATTTCATCTTCTGGACTACAATA	CCTGGGCCCAGAACCATCGCACCATGAGTCTGGCCAAGAGGGTGATGACG			FPR3	NM_002030	Body								0.909505	0.919626	0.0101217	272	803	1075
cg09619390	0.152772	-1.38328	3.18788	0.0020475	0.999978	-1.76304	chr2	19553546	+	11615381		CCRAATTAAAAAACCACTACAACTACCRAAATAAACAACAAAACCTTACC		II			rs45535040	0.010566	NA	NA	NA	NA	chr2:19551735-19551961	S_Shore	CACTGCCTGAAGGAAGGAGTAGTTGGTGAGCTGCAGGGAAGGGTGGATAGGCACCGGCGC[CG]GCAAGGTTTTGCTGCCCATTTCGGTAGTTGCAGTGGCTTCTCAATCCGGATCTGCAAAGA	CGGATTGAGAAGCCACTGCAACTACCGAAATGGGCAGCAAAACCTTGCCG			OSR1	NM_145260	Body		RDMR	TRUE		2:19553010-19553559	Unclassified		0.286031	0.263947	0.0220848	722	359	1081
cg17900076	0.195428	0.739342	3.1161	0.00254699	0.999978	-1.9076	chr18	5195574	+	25770378		AAACTAATTCCAAATAATCTTACTAATCTCTAATAAAATTTTCTAACCTC		II			NA	NA	NA	NA	NA	NA	chr18:5196243-5197389	N_Shore	CCCTGGAGCCAGTGAGATATTTTGTCAGGAAGAAAGGTTGTGGGAGAAAAAGACAGAATT[CG]AGGTCAGAAAACTCCATTAGAGACTAGCAAGATTATCTGGAACCAGCCTCCCTGGGGATG	CGAGGTCAGAAAACTCCATTAGAGACTAGCAAGATTATCTGGAACCAGCC			LOC642597	NM_001145194	Body		RDMR						0.634747	0.606043	0.0287042	885	196	1081
cg03461851	0.269853	-2.60069	3.16891	0.00216977	0.999978	-1.80147	chr15	62457883	-	74639425		TTAATTTAACTAAAAAATAAACCRTCACTCACCCTACATATAACCTAAAC		II			NA	NA	NA	NA	NA	NA	chr15:62456015-62457648	S_Shore	GAAACAGGAAGTTAATTTGGCTAGGAGATAAACCGTCACTCACCCTGCATGTAACCTGGA[CG]TGACCTGCACGTCCTGGGAGCTTCTGTTTTCCTGTCCCCACGCACTCGCAGCGTGCAGAC	CGTCCAGGTTACATGCAGGGTGAGTGACGGTTTATCTCCTAGCCAAATTA			C2CD4B	NM_001007595	TSS1500				15:60243326-60245229				0.152928	0.12971	0.0232181	758	324	1082
cg15704700	0.205761	0.185417	3.10693	0.00261843	0.999978	-1.9259	chr8	144314046	-	64643403		ATATTACACCAAATTATACAAAATAATAACCTTAAATTAAACACRATAAC		II			NA	NA	NA	NA	NA	NA	chr8:144311708-144311985	S_Shelf	CGGAGGGTGTAATATTGCACCAAGTTATGCAAAATGATAGCCTTGGGTTGGGCACGGTAG[CG]CACGCCTGTAATCCCAGCACTTTGGGAGGCCAAGGCCAGTGGATCACCTGAGGTCAGGAG	TATTGCACCAAGTTATGCAAAATGATAGCCTTGGGTTGGGCACGGTAGCG												TRUE	0.542922	0.512323	0.0305988	910	172	1082
cg21112440	0.246732	-3.3519	3.36395	0.00118281	0.999978	-1.39874	chr12	48744082	+	44733449	38780348	TACCCATAACAAAAACCAAAATTCTCTAATAAACAAAACCAACTCATCCA	TACCCGTAACAAAAACCAAAATTCTCTAATAAACGAAACCAACTCGTCCG	I	T	Red	rs74087201	0.033364	NA	NA	NA	NA	chr12:48744318-48745099	N_Shore	AGCCAGTGCTGATGAACAGAAAAGGGGCCATGTTATAAAAATGAGTAGCCCAAGGGCACA[CG]GACGAGTTGGCTCCGTCCATCAGAGAACCCTGGCCCCTGCCACGGGTAGGGCATGGGCGG	CGGACGAGTTGGCTCCGTCCATCAGAGAACCCTGGCCCCTGCCACGGGTA			ZNF641	NM_152320	TSS200					12:48743712-48745643	Promoter_Associated		0.0956323	0.0827087	0.0129236	411	673	1084
cg03738025	0.21466	-3.02936	3.31226	0.00139225	0.999978	-1.5071	chr6	105388694	+	26633311	74644499	AACCTATAAAACACACAACAAAACCAAAAAAATCAACACATTATAAACCA	AACCTATAAAACGCGCGACGAAACCGAAAAAATCAACACATTATAAACCG	I	A	Red	rs11754600	0.471259	NA	NA	NA	NA	chr6:105388190-105389545	Island	GCGACAGCGGATTCCGTGCCCGGTGGCCGCGCGCCGCCCGGCTGTTCCGCGTCCCCTTGC[CG]GCTCACAATGTGCTGACCCTCCCGGCCCCGCCGCGCGCCTCACAGGTCTCTCGACCTCCG	CGGCTCACAATGTGCTGACCCTCCCGGCCCCGCCGCGCGCCTCACAGGTC									6:105494945-105496203	6:105388630-105389286	Unclassified_Cell_type_specific	TRUE	0.11577	0.101523	0.0142469	477	607	1084
cg18928811	0.14206	-3.67745	3.71037	0.000381231	0.999978	-0.644266	chr4	56412338	-	59645465		CRAATAATAACAAAAATAAAATAAATCACAAAACCTAACRAATCCCCAAC		II			NA	NA	NA	NA	NA	NA	chr4:56411993-56413357	Island	CCAAACGTGCCCGAGTGGTGACAGGAATAAAGTGGGTCACAAGGCCTAGCGGGTCCCCAG[CG]AAAGCTCTCTCGGCACCCGGTCCCCGTCTTTCCCCGCCTCCCAGCTGCTGGAATCGGCCG	CGCTGGGGACCCGCTAGGCCTTGTGACCCACTTTATTCCTGTCACCACTC			CLOCK	NM_004898	5'UTR				4:56106697-56108474	4:56411984-56412397	Promoter_Associated		0.075151	0.0688259	0.0063251	128	957	1085
cg19022780	-0.244171	-2.7169	-3.2169	0.00187287	0.999978	-1.70394	chr9	134378720	-	28666487		AAAAAAACRTACTACRAATACAATCTCAAAATAAAAACRAAACTAAAACC		II			NA	NA	NA	NA	NA	NA	chr9:134378193-134378792	Island	AGCCCTAGGGAGGAAGGGCGTGCTGCGGGTGCAGTCTCAGGGTGAGGACGGAGCTGGGGC[CG]ACGCAGCCTCGGGAGTTGGTGGACGGGACAGGTGCGGCCTGTGGGGAAGAAGGGCCGGCC	CGGCCCCAGCTCCGTCCTCACCCTGAGACTGCACCCGCAGCACGCCCTTC			POMT1;POMT1;POMT1;POMT1;POMT1	NM_001136113;NM_001077365;NM_001136114;NM_001077366;NM_007171	5'UTR;5'UTR;5'UTR;5'UTR;5'UTR				9:133367851-133369400	9:134378038-134380060	Promoter_Associated		0.127295	0.146394	0.0190995	647	438	1085
cg27165836	0.187363	2.84772	3.37685	0.0011354	0.999978	-1.37153	chr1	4193882	-	48667431	18769467	AATAAACAATAATACCAAAACATCACAACAAAACCTTCCATCTCCCACCA	AATAAACGATAATACCGAAACATCACAACAAAACCTTCCATCTCCCACCG	I	A	Red	rs6693173	0.48683	NA	NA	NA	NA	chr1:4192633-4193243	S_Shore	TGGGCATCCGGGGGTGGGCGGTGGTGCCGGAGCATCACAGCAGGGCCTTCCATCTCCCAC[CG]GCAGGAACACACTCTCCAAAAATGAGCTCTGCTCCCCATCTCCAGAGCATCCTCCCGGCC	GGTGGGCGGTGGTGCCGGAGCATCACAGCAGGGCCTTCCATCTCCCACCG							RDMR						0.88153	0.868772	0.0127583	401	686	1087
cg09630706	-0.225473	3.6483	-3.48703	0.000797268	0.999978	-1.13621	chr7	229695	-	20687478	18721434	AATAAACAAAAAACATAAACCACAAACTCAAAAACCAAAAAATCATACCA	AATAAACAAAAAACGTAAACCGCGAACTCGAAAACCAAAAAATCGTACCG	I	A	Red	rs62430333	0.115525	NA	NA	NA	NA	chr7:231272-231539	N_Shore	AAGTGACGCAGAAATGGGCAGGAAGCGTGGACCGCGAACTCGGGGACCAAAAGGTCGTGC[CG]GAGTCACTGCCAGGGAGAGCCCCGCACCTTCCAGAGCTCTGCCGGCTGAAAGCCTGGTAT	CGGCACGACCTTTTGGTCCCCGAGTTCGCGGTCCACGCTTCCTGCCCATT			FAM20C	NM_020223	Body			TRUE	7:324396-324823			TRUE	0.921391	0.931446	0.0100549	283	806	1089
cg04833845	-0.165229	0.628502	-3.12597	0.00247214	0.999978	-1.88786	chr19	44286076	+	41786500		AAATATACCAAAATCATCTTACTTCAAACATATACTTCTTAAATTTCTCC		II			NA	NA	NA	NA	NA	NA		OpenSea	GTATGGTCAGAGGACAAGCTGAGTGGATGCATGCAGAGACCTACAAGGTACAGCGACACA[CG]GAGAAACCCAAGAAGCACATGCCTGAAGCAAGATGATTCTGGTATATTCTGGCCACACAG	CGGAGAAACCCAAGAAGCACATGCCTGAAGCAAGATGATTCTGGTATATT		TRUE	KCNN4	NM_002250	TSS1500								0.596593	0.62409	0.0274974	861	228	1089
cg00566369	0.182866	2.48092	3.29294	0.00147912	0.999978	-1.5473	chr8	144935784	+	23778427	33713450	AAACACACTTAAAAATATTAACATTTTCACTTTAACAAACACTCATCCCA	AAACGCGCTTAAAAATATTAACATTTTCACTTTAACGAACACTCATCCCG	I	A	Red	NA	NA	NA	NA	NA	NA		OpenSea	TGAGCCAACACGGATCCACTGCACACAGCCGCTGGGATACGGCTTGTGGCCTGACCCAGC[CG]GGATGAGTGCCCGCCAAAGTGAAAATGCCAACATTCTCAAGCGCGTTCTCGCAGGGCTCA	GAACGCGCTTGAGAATGTTGGCATTTTCACTTTGGCGGGCACTCATCCCG								TRUE	8:145007722-145007824			TRUE	0.852326	0.837248	0.0150782	512	578	1090
cg04645160	0.242245	1.04967	3.08228	0.00281974	0.999978	-1.97488	chr15	96913183	-	32712452		TAAAACATTACTCTTAAATCCTAAAAACTAAAAAACATATTACAACCCCC		II			NA	NA	NA	NA	NA	NA	chr15:96911511-96911808	S_Shore	CGTCCGGCAACTGAAGCATTGCTCTTGGGTCCTGAGAGCTGGAGGGCATGTTGCAACCCC[CG]GCGCCCACTCCCAGACACTTACACCTACATCTACTTTTCTGCAAAACAAAGTTCTGTTCC	GAAGCATTGCTCTTGGGTCCTGAGAGCTGGAGGGCATGTTGCAACCCCCG							RDMR	TRUE					0.685451	0.648833	0.0366183	986	105	1091
cg01924880	0.208669	-1.96421	3.1372	0.0023895	0.999978	-1.86536	chr4	5892208	+	74769402	72712325	CTACCAACAAAACAACCTTAAAACTTAAATTACAATAAACTCAAATTCCA	CTACCGACAAAACGACCTTAAAACTTAAATTACAATAAACTCGAATTCCG	I	A	Red	rs115557370	0.055169	NA	NA	NA	NA	chr4:5891981-5892365	Island	GGGCGGGGGGGGAAGGGCCGGGGCACCCGTTGCGAAGCCCTGGAGCGGTGAGGCCCGCCC[CG]GAACCCGAGCCCACTGTAACCCAAGCCTCAAGGCCGCTCTGCCGGCAGAAAGTAAAACCC	CTGCCGGCAGAGCGGCCTTGAGGCTTGGGTTACAGTGGGCTCGGGTTCCG			CRMP1	NM_001014809	Body		DMR		4:5942931-5944006				0.215405	0.189598	0.0258075	833	259	1092
cg02964602	-0.136896	0.422267	-3.16472	0.00219771	0.999978	-1.80995	chr2	203130213	-	31759377	26723421	AACATAAACCACTACACCCAACTAAAAAAATTTCTTAAACCCAAAAAACA	AACGTAAACCACTACGCCCGACTAAAAAAATTTCTTAAACCCGAAAAACG	I	A	Red	NA	NA	NA	NA	NA	NA	chr2:203130313-203130760	N_Shore	GCTGGGATTACAGGCGTGAGCCACTGCGCCCGGCTAGGAGAATTTCTTGAACCCGGGAGG[CG]GAGGTTGCAGTAAGCCGAGATCACACCACTGCACTCCAGCCTGGGTTACAGAGCGAGACT	CGCCTCCCGGGTTCAAGAAATTCTCCTAGCCGGGCGCAGTGGCTCACGCC			NOP58	NM_015934	TSS1500					2:203130183-203131013	Promoter_Associated		0.563975	0.587074	0.0230989	765	329	1094
cg21611170	0.149813	-0.015594	3.126	0.00247189	0.999978	-1.88779	chr5	114938389	-	56658447		AATCTAAAAAAAAATTCCACCRTATTTACTCCTTACAAACCAAACAAACC		II			rs73254595	0.010064	NA	NA	NA	NA	chr5:114937613-114938149	S_Shore	AGGCCCAGAAAAATCTGGAAAGGAATTCCACCGTGTTTGCTCCTTACAGACCAGACAAAC[CG]TAGATCTTTCAGAGGTACAGCGACTCTCCTGGTTCCCTAAGATAGTCTCGACTTTTCCTT	CGGTTTGTCTGGTCTGTAAGGAGCAAACACGGTGGAATTCCTTTCCAGAT			TMED7-TICAM2;TICAM2;TMED7-TICAM2	NM_001164468;NM_021649;NM_001164469	Body;TSS1500;Body					5:114937345-114938922	Unclassified	TRUE	0.507173	0.480057	0.0271162	860	234	1094
cg21099419	0.24641	3.22653	3.25455	0.00166705	0.999978	-1.62671	chr7	97844473	+	29604508	24743394	AACACCTATCTATCAAAAACTAAATACATCCACAACCCCAAAAAATAACA	AACGCCTATCTATCGAAAACTAAATACGTCCACAACCCCGAAAAATAACG	I	C	Grn	NA	NA	NA	NA	NA	NA	chr7:97840559-97840845	S_Shelf	CAAGTCCCTGCACAAGCAGGTCAGAGACCCACCCACATGCCGTTCCTGGGCTACGCCACG[CG]CCATCCCCCGGGGCTGTGGACGCACCCAGCCCCCGACAGACAGGCGCCCTGAGAGCTCCG	GGCGCCTGTCTGTCGGGGGCTGGGTGCGTCCACAGCCCCGGGGGATGGCG									7:97682294-97682556	7:97843969-97844507	Unclassified_Cell_type_specific		0.907484	0.891214	0.0162698	570	525	1095
cg15353061	0.159526	-3.79011	3.64977	0.000466997	0.999978	-0.779655	chr14	51562486	+	70640406		ATCTCATATCRACACTAAAAAATCRACTTTATACATACTCTTTAAAAAAC		II			NA	NA	NA	NA	NA	NA	chr14:51560116-51562487	Island	GTCTGACGGCGCTGGCGCAAGCCCTGGCGACACTCTTGGCTTCTTTCATCCTGCGTCCCT[CG]TTTCCTAAAGAGCATGTATAAAGTCGATTTCCTAGTGTCGACATGAGATTCAACTGGGTA	TCTCATGTCGACACTAGGAAATCGACTTTATACATGCTCTTTAGGAAACG			TRIM9;TRIM9	NM_052978;NM_015163	TSS200;TSS200				14:50629875-50632237				0.070419	0.0634198	0.00699924	162	934	1096
cg27267377	0.141829	1.52362	3.23669	0.00176189	0.999978	-1.66343	chr8	142336170	-	51689423		ACRCTAAAACCAACTCAAAACACAAACRTCTAAACAACCTTACTAAAAAC		II			NA	NA	NA	NA	NA	NA		OpenSea	CAGGAACAAAGACGCTGGGACCAGCTCAAGACACAGACGTCTGGACAGCCTTACTGGAGA[CG]GTGGGGACTTGGAGGCCAGGGAGGGCGAGGGGCCGGGGGGACAAGGAGGGGCGGAGGAGG	CGCTGGGACCAGCTCAAGACACAGACGTCTGGACAGCCTTACTGGAGACG									8:142404568-142405388	8:142336120-142336248	Unclassified		0.747608	0.729964	0.0176441	614	482	1096
cg00920424	0.14353	0.564217	3.15868	0.00223853	0.999978	-1.82214	chr3	127172519	+	74687473		TATTAAACTAAAAATTACATTCTTACTATTTACCCATTCATTCATTCACC		II			rs77064329	0.016011	NA	NA	NA	NA	chr3:127174375-127174944	N_Shore	CAATAAACAAGATGGCTTAAGATGGAGAAGATAAAACAGGGTGATGTGCTGGGCCAGAGT[CG]GTGAATGAATGAATGGGCAAATAGCAAGAATGCAATTTTCAGTCCAACAACACAATAGGA	CGGTGAATGAATGAATGGGCAAATAGCAAGAATGCAATTTTCAGTCCAAC													0.604659	0.581166	0.0234935	781	315	1096
cg19320928	-0.136332	-3.37911	-3.63448	0.000491373	0.999978	-0.813595	chr4	103749266	+	19797485		CCAACCACCRACATAAACATTCAAAAACRTTACTTTCCTAACAATAACCC		II			NA	NA	NA	NA	NA	NA	chr4:103747631-103749392	Island	TCCGCCTCCAAAATGCATAAGTTCTCGCGAGACGCAGTAAGGCACCGGCTCGAACTGGGG[CG]GGCCACTGCCAGGAAAGCAACGCCCCTGAATGCTTATGCCGGTGGTTGGTAGAGGAAATG	CGGGCCACTGCCAGGAAAGCAACGCCCCTGAATGCTTATGCCGGTGGTTG			UBE2D3;UBE2D3;UBE2D3;UBE2D3;UBE2D3;UBE2D3;UBE2D3;UBE2D3;UBE2D3;UBE2D3	NM_181886;NM_003340;NM_181889;NM_181887;NM_181891;NM_181892;NM_181893;NM_181889;NM_181888;NM_181890	TSS200;TSS200;5'UTR;TSS1500;TSS1500;TSS1500;Body;1stExon;TSS200;5'UTR				4:103966711-103968675			TRUE	0.0855147	0.0925766	0.00706187	167	930	1097
cg05460370	0.239158	-3.82974	3.50724	0.000746629	0.999978	-1.0925	chr3	45635690	+	71610366	15802385	AAAATTCACAACAACTAAAACTAACAACCCATTATCCAATAACAACAACA	AAAATTCACGACAACTAAAACTAACGACCCATTATCCGATAACGACGACG	I	A	Red	NA	NA	NA	NA	NA	NA	chr3:45635090-45635932	Island	GACTGCGCCTGGCGCACTCACTTCCGCGTCCCGCCGCCCTCCGGCCCGCGCGCGCCGATC[CG]CCGCCGCCATCGGACAATGGGCCGCCAGCCCCAGCTGCCGTGAACTTCCTGCCGCTGCTC	CGCCGCCGCCATCGGACAATGGGCCGCCAGCCCCAGCTGCCGTGAACTTC			LIMD1	NM_014240	TSS1500	high-CpG:45610317-45610707			3:45609848-45610936	3:45634285-45635813	Promoter_Associated		0.0703638	0.0607499	0.00961389	268	829	1097
cg25575458	-0.209493	4.53821	-3.73068	0.000356	0.999978	-0.598568	chr3	39821421	+	55620426	23770336	AAAAAACAACTAAAACACTACAAAAATTCAAACATAAAACAAACAAACCA	AAAAAACGACTAAAACGCTACGAAAATTCGAACGTAAAACAAACAAACCG	I	A	Red	rs142893009	0.0179	NA	NA	NA	NA		OpenSea	TGAGGGGCTTAGCACCCGGGCCAGCAGCTGCGGAGGGGGCGCCGGGTACCCCAGCACTGC[CG]GCCTGCCTGCCCCACGCTCGAATTCTCGCAGCGCCTCAGCCGCCTCCCCGCCGGGCAGGG	CGGCCTGCCTGCCCCACGCTCGAATTCTCGCAGCGCCTCAGCCGCCTCCC									3:39796127-39796539				0.956233	0.961679	0.00544588	113	985	1098
cg17827632	0.123608	-3.20523	3.59944	0.00055188	0.999978	-0.891043	chr1	161087992	-	29609444		ACRAATAATTTTAACTATATCTTCATATAAAACCTACTCCCTATCCCRTC		II			NA	NA	NA	NA	NA	NA	chr1:161087722-161088112	Island	GATCGGACCCTGCGAATGGTTTTGGCTATATCTTCATGTAGGACCTACTCCCTATCCCGT[CG]GCCGCGGTGAATCCCACCTGCGGTGCTTTAACTTGTGTAACAGAGATGCTGCCTCTGGGA	CGAATGGTTTTGGCTATATCTTCATGTAGGACCTACTCCCTATCCCGTCG			PFDN2;NIT1	NM_012394;NM_005600	TSS200;Body				1:159354170-159354813	1:161087185-161088469	Promoter_Associated		0.100984	0.0932243	0.0077595	193	906	1099
cg25638545	-0.173756	3.20156	-3.4647	0.000856958	0.999978	-1.18429	chr6	119461188	-	17697478		AAACAATAACRCCTTACTAAAACTACCCAAAATAACTTAAACCTCAAACC		II			NA	NA	NA	NA	NA	NA		OpenSea	TCCCCAGCTTTGAGCAGTGGCGCCTTGCTGGGGCTGCCCAGGGTGGCTTGGACCTCAGGC[CG]CTGAGTGAGAGGGCTTAAGGACTGGCAGTGGGGAGTTGCTAAAAATGTGTGGGTCTTCAT	CGGCCTGAGGTCCAAGCCACCCTGGGCAGCCCCAGCAAGGCGCCACTGCT			FAM184A	NM_001100411	5'UTR			TRUE					0.897413	0.907727	0.0103142	306	795	1101
cg24744501	0.198478	-2.79994	3.27686	0.00155525	0.999978	-1.58063	chr2	207024175	-	39726353	26810483	AAACCAAATCACTTATTCAATATAACAACCTCAACTAACTCTATCAACCA	AAACCGAATCGCTTATTCAATATAACGACCTCGACTAACTCTATCAACCG	I	A	Red	NA	NA	NA	NA	NA	NA	chr2:207023910-207024981	Island	CGACCCCCTAGGAGGCCGGGTCGCTTATTCAATATGGCGGCCTCGGCTAACTCTGTCAGC[CG]GGCCTGGAGAACGGAAAGCCCGGAGGGACTAGAATCCTTGCATTCGACAAGTTTGTCGGC	AGGCCGGGTCGCTTATTCAATATGGCGGCCTCGGCTAACTCTGTCAGCCG			NDUFS1;EEF1B2;EEF1B2;EEF1B2;NDUFS1	NM_005006;NM_001037663;NM_021121;NM_001959;NM_005006	1stExon;TSS200;TSS200;TSS200;5'UTR	high-CpG:206732390-206732447			2:206731919-206732658	2:207024098-207024946	Promoter_Associated		0.132473	0.11727	0.0152026	532	571	1103
cg08316234	0.179366	1.91504	3.22303	0.00183782	0.999978	-1.69142	chr17	51899386	+	22654460		TATATCCTTTAAAAATTATTAAACAAAACTAAAAAACAACTAAAACCATC		II			NA	NA	NA	NA	NA	NA		OpenSea	TTATAAGCTAATTCTTATGCATGAAAATATTGCAATCTTGGCAAAATATATTTTTGCATC[CG]ATGGTCTTAGCTGCCTTCCAGCCTTGCTTAACAACTTCTAAAGGACACACACAAGTACTG	GTGTCCTTTAGAAGTTGTTAAGCAAGGCTGGAAGGCAGCTAAGACCATCG			KIF2B	NM_032559	TSS1500								0.795679	0.777511	0.0181679	634	471	1105
cg00704310	-0.132276	-3.6107	-3.68533	0.000414672	0.999978	-0.700373	chr19	34288103	-	70796377		ACAAAAACCTAATACAAAAATAAAATTACCCACRTAAACTAATCCTAACC		II			NA	NA	NA	NA	NA	NA	chr19:34286184-34289135	Island	GGGTGCCCAGCACAAAGGCCTGGTGCAAGAGTGGGGTTGCCCACGTGGGCTGGTCCTGGC[CG]CGGGTGGACCCTCCCCACGCGGGCGGTCTCGGAGCTTCCTGCCGCGCGGTGTGTGTGTGT	CAAAGGCCTGGTGCAAGAGTGGGGTTGCCCACGTGGGCTGGTCCTGGCCG		TRUE	KCTD15;KCTD15;KCTD15	NM_001129994;NM_001129995;NM_024076	5'UTR;5'UTR;5'UTR				19:38978051-38980468				0.073757	0.0798874	0.00613046	141	966	1107
cg14529474	0.233876	-2.15039	3.13374	0.00241469	0.999978	-1.8723	chr1	82269526	-	70620417		TCAATACRTACACTTCTCTTCCCCTTTCCAAAAACATAAATTTAACRAAC		II			rs12726673	0.012663	NA	NA	NA	NA	chr1:82265998-82269048	S_Shore	TCTGCATTCTTTCAGTACGTGCACTTCTCTTCCCCTTTCCAGAGGCATAGATTTAACGGA[CG]TAGTTGATTCATTCATTTCTCTGTCACTATTTATGTGTGGAACGGGTCCCACCGAGTTTG	CGTCCGTTAAATCTATGCCTCTGGAAAGGGGAAGAGAAGTGCACGTACTG			LPHN2	NM_012302	5'UTR	low-CpG:82042098-82042155	DMR						0.195592	0.170033	0.025559	840	268	1108
cg14913969	0.305581	-5.31825	3.73903	0.000346098	0.999978	-0.579739	chr18	19749138	-	57664404	37676413	TACAACTACAAAAACAAAAAAATACACCACCACTAAATAAATACAAATCA	TACGACTACGAAAACGAAAAAATACACCGCCGCTAAATAAATACGAATCG	I	C	Grn	rs181830357	0.0179	NA	NA	NA	NA	chr18:19744936-19752363	Island	TGGGTGTGTGTGTGCGACTGCGGGAGCGGGAGGGTGCACCGCCGCTGGATGGGTGCGGGT[CG]CTAGCCAGGTCAGGCGTTCTGTGGCCTCCGCCCCTCCCCCGGGGTCCCTGGGCTCGGTGC	TGCGACTGCGGGAGCGGGAGGGTGCACCGCCGCTGGATGGGTGCGGGTCG			GATA6	NM_005257	TSS1500	high-CpG:18003020-18003307			18:18002221-18004908	18:19749106-19750021	Unclassified		0.0267923	0.0224009	0.00439146	112	997	1109
cg06670785	0.162444	3.48579	3.54147	0.000667753	0.999978	-1.0181	chr22	20073572	+	24719474	68734404	ACCACTAAACATTTACAAAAAAAATAATAAAAACTACTCACAAAACAACA	ACCACTAAACGTTTACAAAAAAAATAATAAAAACTACTCACGAAACAACG	I	C	Grn	NA	NA	NA	NA	NA	NA	chr22:20073363-20073931	Island	CGCTCCCGTGTGGGCCCGCAGGAGAAGCGGTGATGGAGAGCCGAGCTCGCCCCTTCCAAG[CG]CTGCCCCGTGAGCAGTCTCCACCACCTCCCCTGCAAACGTCCAGTGGTGCAGAGGTAATG	CGCTGCCCCGTGAGCAGTCTCCACCACCTCCCCTGCAAACGTCCAGTGGT			MIR1306;DGCR8	NR_031706;NM_022720	TSS200;Body				22:18453512-18453931				0.920469	0.912229	0.00824081	234	882	1116
cg23200841	-0.179694	-3.93377	-3.60504	0.000541756	0.999978	-0.878697	chr20	33104125	-	56651411		TTACCACAATAAAAAACAAATTTTCCAAAAATCCTAACRAAACCAAAATC		II			NA	NA	NA	NA	NA	NA	chr20:33104112-33104543	Island	AGCTTTTCGCTTTGCCACAGTGGAAAGCAGATTTTCCAAGAATCCTGGCGGAGCCAAGAT[CG]GCTCGCCCGCCCCCGCCTCACGCTGGCTCCTGATAGGCAGCTAGAGCTGTCCGTTTTGAC	TGCCACAGTGGAAAGCAGATTTTCCAAGAATCCTGGCGGAGCCAAGATCG			DYNLRB1	NM_014183	TSS200				20:32567774-32568322	20:33103923-33105042	Promoter_Associated		0.0594231	0.0664733	0.0070502	186	931	1117
cg16347917	-0.254292	2.96292	-3.20491	0.00194327	0.999978	-1.72841	chr1	243491053	+	38764419		ATCAAAAAAATAATTTATTCTTTCTAAAAATAACTCTCTCACACTAAACC		II			NA	NA	NA	NA	NA	NA		OpenSea	AGCTTTAATGGAGATAGTGTATAAATAATTGTTTACTAGACCCAAATCTTTTAGTATGTG[CG]GTCCAGTGTGAGAGAGTTATCTTTAGAAAGAATAAATCATTTTTCTGATTCCAAGTGTTA	CGGTCCAGTGTGAGAGAGTTATCTTTAGAAAGAATAAATCATTTTTCTGA	TRUE		SDCCAG8	NM_006642	Body								0.877058	0.895959	0.0189015	672	446	1118
cg24348823	0.363915	-4.38792	3.38201	0.00111692	0.999978	-1.36062	chr19	5680464	+	45698452	69726319	ATAAATCCAAACAACCATAATAACCCAAATATAATCACTAATAAAATACA	GTAAATCCGAACGACCATAATAACCCGAATATAATCGCTAATAAAATACG	I	T	Red	NA	NA	NA	NA	NA	NA	chr19:5680433-5681417	Island	GACAGGGATGCCCACAAAAATGGACTTTTTCGGGGACTCGGGTCCCCTCCGGCGCCCCCA[CG]CACCTCATCAGCGACCACACCCGGGCCACCATGGTCGCTCGGATCCACGCGCAAGGACAC	CGCACCTCATCAGCGACCACACCCGGGCCACCATGGTCGCTCGGATCCAC			HSD11B1L;HSD11B1L;HSD11B1L;HSD11B1L;C19orf70;HSD11B1L;HSD11B1L	NM_198707;NM_198706;NM_198533;NM_198704;NM_205767;NM_198705;NM_198708	TSS1500;TSS1500;TSS1500;TSS1500;Body;TSS1500;TSS1500				19:5630778-5632417	19:5679964-5681501	Promoter_Associated		0.0522496	0.0403779	0.0118716	396	724	1120
cg21493873	-0.234839	2.68494	-3.26248	0.00162647	0.999978	-1.61036	chr14	57960754	+	33605374		TCTAAACCTCTACTCTACATCTCTCTCTATTAATAACCTTCCTAATATTC		II			NA	NA	NA	NA	NA	NA		OpenSea	CTACTTTCTGAAATACTCAGTGATAGGAATAGAAGCCACTGTTGATCATTAAACAAATAT[CG]AACACCAGGAAGGTTATTAACAGAGAGAGATGTAGAGCAGAGGTTTAGAGAAGTCTTAAA	CGAACACCAGGAAGGTTATTAACAGAGAGAGATGTAGAGCAGAGGTTTAG			C14orf105	NM_018168	TSS200			TRUE					0.857801	0.873213	0.0154117	556	565	1121
cg14909842	-0.213582	1.97932	-3.15148	0.00228809	0.999978	-1.83664	chr21	44869885	+	24604396		AAAACRAACAAACTACRAAACAAAAAACAATAAACCTTCTACCTAAATAC		II			NA	NA	NA	NA	NA	NA		OpenSea	AGGGGCTGGCTGAGGGGCTGGGATGGGGTCCCCGGGGCGCGGAGCTGCACACCAGCCCCT[CG]CACCTAGGCAGAAGGTCCATTGCCCTCTGCCCCGCAGCCTGCCCGTTCCCAGGCCAGCGA	CGCACCTAGGCAGAAGGTCCATTGCCCTCTGCCCCGCAGCCTGCCCGTTC			C21orf125	NR_026960	TSS200				21:43693938-43694886			TRUE	0.787275	0.810427	0.023152	796	326	1122
cg14110086	-0.235309	2.5111	-3.18951	0.0020373	0.999978	-1.75974	chr17	53827579	+	41679357		AACTTTAAATAAAATAAATCRTTTAAACATCAAAACRATATAACAACCAC		II			NA	NA	NA	NA	NA	NA	chr17:53828422-53828738	N_Shore	CAATTCTTGACCCATTTTACAGATTAGGAAACATGAGTTTCCAGAGTTTATTGGCACTCA[CG]TGGCTGTTACATCGTTTTGATGTTCAAACGACCTACTTTATTCAAAGTCAGGTAGTACAG	CGTGGCTGTTACATCGTTTTGATGTTCAAACGACCTACTTTATTCAAAGT			PCTP;PCTP	NM_021213;NM_001102402	TSS1500;TSS1500								0.841152	0.861363	0.0202105	720	405	1125
cg10066189	0.121688	-3.58939	3.68104	0.000420674	0.999978	-0.709962	chr6	33239327	-	23760300		CCACCCTTATACCTAAACCCAACTCAAATCTTTCTAAAACTAAAAACACC		II			NA	NA	NA	NA	NA	NA	chr6:33239326-33240099	Island	CAGCCAAGTTCCCACCCTTGTGCCTAAACCCAGCTCAGGTCTTTCTGAAGCTAGGAGCAC[CG]GAACTACGGAGGAGAAACAGCTCCGCGCTCTCACCAGCGGGCCCTCTTCCTCCTCCATAT	CGGTGCTCCTAGCTTCAGAAAGACCTGAGCTGGGTTTAGGCACAAGGGTG			VPS52;RPS18	NM_022553;NM_022551	Body;TSS1500					6:33238930-33240058	Promoter_Associated		0.0789543	0.0734929	0.00546139	145	984	1129
cg14430886	0.396942	-3.03707	3.10126	0.00266355	0.999978	-1.9372	chr7	44646103	+	42690383	10624351	TCCCCTAAAAAAAAATACCCTCCCCTCTTACAAAAAACCAATTCATAACA	TCCCCTAAAAAAAAATACCCTCCCCTCTTACAAAAAACCGATTCGTAACG	I	T	Red	NA	NA	NA	NA	NA	NA	chr7:44646065-44646823	Island	GCTGGCCCTGGCTTCTGCAACTGCGCAGTCGGCGCTGTGACGCCCGGCGCGGCTCTGTGA[CG]TCACGAATCGGTCCTCTGTAAGAGGGGAGGGCATTCTTCTCCAGGGGAGGGCTACGTGTT	CGTCACGAATCGGTCCTCTGTAAGAGGGGAGGGCATTCTTCTCCAGGGGA			OGDH;OGDH;OGDH	NM_001165036;NM_001003941;NM_002541	TSS200;TSS200;TSS200				7:44612546-44613378	7:44645641-44647293	Promoter_Associated		0.124802	0.0963269	0.0284756	929	201	1130
cg25316305	0.158064	1.46243	3.1609	0.0022234	0.999978	-1.81765	chr12	4361135	+	27688356		ATACAAAACCCCAAACCAAAAACAATAAAAAAACATAAAAATAACCCAAC		II			NA	NA	NA	NA	NA	NA		OpenSea	CAAAATGCAGCTGGCTACAACAGCGCCTCCAGTCTGCAGCCTCCTCCAGAGTGGTCTCCA[CG]CTGGGTTATCCTCATGCCCTCTTACTGTTCCTGGTCTGGGGTCTTGCACATCATAGCCAC	CGCTGGGTTATCCTCATGCCCTCTTACTGTTCCTGGTCTGGGGTCTTGCA								TRUE					0.740802	0.718612	0.0221897	774	357	1131
cg03712476	0.160886	-3.36516	3.51323	0.000732211	0.999978	-1.07951	chr4	77611020	+	70650504		TCTCTAATAAAAAACCAAAACCTAAAAATATCAAAAAACCCTCRAAACAC		II			NA	NA	NA	NA	NA	NA	chr4:77610324-77610943	S_Shore	TCTGGAGGATGGCTCCCAGGGGCTTTCACGGCCAGCACCCCGGCTGATGGGGGCAGGTGG[CG]TGCTCCGAGGGTCTCCTGACACTCCTAGGCCTTGGCTTTTTATCAGAGAGGCAGTAGCTG	CTCTGATAAAAAGCCAAGGCCTAGGAGTGTCAGGAGACCCTCGGAGCACG			SHROOM3	NM_020859	Body					4:77611006-77611022	Unclassified_Cell_type_specific	TRUE	0.0921603	0.0836755	0.00848486	259	873	1132
cg07944258	-0.238407	3.07908	-3.24581	0.00171282	0.999978	-1.64469	chr4	76407419	-	46780372		TACTAAAAATTAAATACAATTCTATCAAAAACTAAAAATAAACTACACRC		II			NA	NA	NA	NA	NA	NA		OpenSea	GTCAAGACTACTACTGAAAATTAAGTGCAGTTCTATCAAGAACTAGAAATGAACTGCACG[CG]TAGTGTCACTTAAAGCAAAGCTTCATGAAAATATAATACACTTCTATGAATGTATCAGTG	CGCGTGCAGTTCATTTCTAGTTCTTGATAGAACTGCACTTAATTTTCAGT			RCHY1;RCHY1;RCHY1	NM_001009922;NM_001008925;NM_015436	3'UTR;3'UTR;3'UTR					4:76407400-76407546	Gene_Associated_Cell_type_specific		0.886501	0.902527	0.0160257	597	535	1132
cg20540748	0.148624	1.63418	3.22191	0.00184418	0.999978	-1.6937	chr6	170407101	-	20661460		AAAAAATATATTAAAACTTATCTATATCAAATACCTCATCATCRATCAAC		II			rs79079842	0.018679	NA	NA	NA	NA		OpenSea	TAAATTGCACCAGGGAATATGTTAGGACTTATCTGTATCAGGTGCCTCATCATCGGTCAA[CG]CTGCGTCACCCTGGGCAGTCACAACACCACACAAACTCACGACAGCACCACGCAGCTCAC	GGGAATATGTTAGGACTTATCTGTATCAGGTGCCTCATCATCGGTCAACG									6:170249026-170249446				0.761708	0.744542	0.0171652	637	496	1133
cg05347613	-0.222591	3.05956	-3.25344	0.0016728	0.999978	-1.629	chr9	101748082	+	70630474		TCCTCCACACCTAAAAACCRCAAACCCAAATAAATAACCTTCTAAAAAAC		II			NA	NA	NA	NA	NA	NA	chr9:101747876-101748083	Island	CATCAGCGTCGTGGTGAAGCCCAGCAGCACCCGTGGTGGCGTGCTCTTCGCCATCACTGA[CG]CCTTCCAGAAGGTCATCTACCTGGGCCTGCGGCTCTCAGGTGTGGAGGACGGCCACCAGC	CGCCTTCCAGAAGGTCATCTACCTGGGCCTGCGGCTCTCAGGTGTGGAGG			COL15A1	NM_001855	Body				9:100787698-100787984				0.885618	0.901054	0.0154359	573	564	1137
cg08851181	-0.203563	2.35194	-3.19267	0.0020177	0.999978	-1.75333	chr10	71228077	-	17790474		CTAACTACCCACAACCTACCTAAAAAAACCCRATATACCCTAATATAACC		II			rs73269811	0.011436	NA	NA	NA	NA		OpenSea	AAGACCCCCAGCTGGCTGCCCACAGCCTGCCTGGGGAGACCCGGTGTGCCCTGGTGTGGC[CG]GGTCATGGCTCTTGGCAAGTCAGTGCACTGATGTGTAGGGCAGTGGCTCTTTGTTCCTTG	CGGCCACACCAGGGCACACCGGGTCTCCCCAGGCAGGCTGTGGGCAGCCA			TSPAN15	NM_012339	Body			TRUE					0.82741	0.846864	0.0194543	708	429	1137
cg25081552	0.25042	2.16278	3.12499	0.00247946	0.999978	-1.88981	chr10	29186582	+	42724418		TACRAAACRCTAAAACCTACACACAACAAATTAACTCCAAAAAACATTCC		II			NA	NA	NA	NA	NA	NA		OpenSea	GGGTGGTGTGGGACAGCGACCTCTCATCATATCGTCAACAGCCAGAAACATAGATACAAC[CG]GAATGTTTTCTGGAGCCAATTTGCTGTGTGCAGGCCTCAGCGTTCCGTATCGTTTTGTTC	ACGGAACGCTGAGGCCTGCACACAGCAAATTGGCTCCAGAAAACATTCCG									10:29226544-29226806				0.823893	0.798509	0.025384	867	270	1137
cg23389585	-0.264011	-4.50163	-3.57296	0.000602222	0.999978	-0.949248	chr17	11900605	+	11613391	55725437	AAACTACAAAAAAACCAACAAACTCCCTTACCCATACATCTAAAAACACA	AAACTACGAAAAAACCAACGAACTCCCTTACCCATACGTCTAAAAACGCG	I	C	Grn	NA	NA	NA	NA	NA	NA	chr17:11900442-11900984	Island	CGCACCCACGGTCCACTCCCAGCCATGGCTGCCCCGGCCCCGCACTCGCCACGTCCCCCG[CG]CGCTCCCAGACGCATGGGCAAGGGAGCCCGCTGGCCCCTCCGTAGCTCCGGGGTGCCCAG	GAGCTACGGAGGGGCCAGCGGGCTCCCTTGCCCATGCGTCTGGGAGCGCG			ZNF18;ZNF18	NM_144680;NM_144680	5'UTR;1stExon				17:11840946-11841806	17:11899658-11901617	Promoter_Associated		0.0406872	0.0477207	0.00703346	208	933	1141
cg09304244	-0.21635	3.59068	-3.38369	0.00111098	0.999978	-1.35707	chr2	11299993	-	44755414		TTTCTTCTAAAAATATAAAACCCTATAACCTTCRCAACATCCTCACAACC		II			rs11891302	0.363014	NA	NA	NA	NA	chr2:11295559-11296006	S_Shelf	AAGCTCTGCCTTTTCTTCTGAGAATGTGGGACCCTGTGGCCTTCGCAGCATCCTCACAGC[CG]GAGTCTTCTTAGCGAAATTGAGGGTGGTTCTTCACGCTTTCCCCCACTGCCCTCTCAACC	CGGCTGTGAGGATGCTGCGAAGGCCACAGGGTCCCACATTCTCAGAAGAA			PQLC3	NM_152391	Body								0.918091	0.929368	0.0112773	393	749	1142
cg10116794	-0.309377	-2.28393	-3.09805	0.00268935	0.999978	-1.94357	chr16	4588889	-	22686493	69650427	TCTCAAAAAACACATAATACACCATAATAACATCAATAAAAACAAAAACA	TCTCGAAAAACACGTAATACGCCGTAATAACGTCAATAAAAACGAAAACG	I	A	Red	NA	NA	NA	NA	NA	NA	chr16:4587836-4588890	Island	TGGGGGGTGGGGTCTCGGGAGGCACGTGATGCGCCGTGATGACGTCAGTGGGAGCGGAGG[CG]ATTTGGCCTAGAGCTGGGGCTGAGCACGTGGGATGGTCGGGGCCTGTTTGCCCAATGTAC	CGCCTCCGCTCCCACTGACGTCATCACGGCGCATCACGTGCCTCCCGAGA			C16orf5	NM_013399	TSS200		DMR		16:4527620-4528930	16:4587791-4589201	Promoter_Associated		0.164365	0.19273	0.0283648	938	207	1145
cg22777513	-0.160964	2.43628	-3.25873	0.00164552	0.999978	-1.61808	chr4	713393	-	53663463	13799477	CTATAATACAACTACAATACAAAATCCCATCAAAAAACAAAAACAAAACA	CTATAATACAACTACAATACGAAATCCCGTCAAAAAACAAAAACGAAACG	I	T	Red	NA	NA	NA	NA	NA	NA	chr4:713927-714137	N_Shore	AGCTGTGTGTGTCTGTGGTGCAGCTGCAATGCGGGGTCCCGTCAGGGAACAGGAGCGAGG[CG]TTTACGCCATAAGGAGGTGGAGAAGGGATGGTGTGTGAGTTTGGCAGGTGCTGAGGGCTA	CGCCTCGCTCCTGTTCCCTGACGGGACCCCGCATTGCAGCTGCACCACAG			PCGF3	NM_006315	5'UTR				4:703175-703758				0.837673	0.852526	0.0148532	560	587	1147
cg18150721	0.158	-4.01111	3.60543	0.000541059	0.999978	-0.877839	chr3	134514881	-	21790507		CTACATTACRATACATACTCCTTAACTCTAAAACAAAACCAAAACTAAAC		II			NA	NA	NA	NA	NA	NA	chr3:134514085-134515980	Island	CTCGGAGCCCGCTGCATTGCGGTGCATGCTCCTTAGCTCTGGGGCAGAGCCAGAGCTGGG[CG]TTGGGGAGAAAGGGGTGCCTCTGGCCATCCGGCTCCTGGAGTACTGGCGCCCGTCTGCTC	CGCCCAGCTCTGGCTCTGCCCCAGAGCTAAGGAGCATGCACCGCAATGCA		TRUE	EPHB1	NM_004441	Body		DMR		3:135996374-135999273				0.0610476	0.0549249	0.0061227	185	967	1152
cg25876840	0.132795	0.930561	3.19941	0.00197635	0.999978	-1.7396	chr17	41920477	-	11698304		AATTCTAAAATTCAACATTAAATTCTACCCACTATCCTATTTCCAAAACC		II			NA	NA	NA	NA	NA	NA		OpenSea	CAGTTTTACCTGATTCTGGGGTTCAGCATTAGGTTCTGCCCACTGTCCTGTTTCCAAAAC[CG]TGTTACTATGCCTGCATCAAGCTTATCCACCCGCGGCCCACGGGCTGCATGCAGCCAGGA	CGGTTTTGGAAACAGGACAGTGGGCAGAACCTAATGCTGAACCCCAGAAT							DMR						0.662081	0.643634	0.0184463	691	462	1153
cg12608507	-0.149532	-0.930493	-3.122	0.00250197	0.999978	-1.8958	chr2	207025477	+	21744396		CTAAAATAACCTAAATCCAATTTTATCATATAAACATCCTAATAAACTTC		II			NA	NA	NA	NA	NA	NA	chr2:207023910-207024981	S_Shore	CGAAAAGGAAAAGGCCAGGTAAAATCATCTTTGTATAGAGCTGAAGAATAAGACTGCTCT[CG]AAGTTTATCAGGATGTTCACATGACAAAACTGGACCCAGGCTACTTTAGTTTTGTTGGGA	TAAAGTAGCCTGGGTCCAGTTTTGTCATGTGAACATCCTGATAAACTTCG			EEF1B2;EEF1B2;SNORD51;NDUFS1;SNORA41;EEF1B2	NM_001037663;NM_001959;NR_002589;NM_005006;NR_002590;NM_021121	Body;Body;TSS1500;TSS1500;TSS1500;Body								0.335712	0.360906	0.0251934	875	278	1153
cg16704279	-0.217693	2.33836	-3.16802	0.00217564	0.999978	-1.80327	chr2	215678246	+	33629391		TTCATTTACTCTAATCACAATTAAATTATACCCCAAATATAATAACRCAC		II			NA	NA	NA	NA	NA	NA	chr2:215673995-215675052	S_Shelf	GCGTTCAAGGGGTTCAAGCGATTCTCGTGCCTCACCCTGCCGAGTAGCTGGGGCTACAGG[CG]TGCGCCACTATACTTGGGGCACAATTTAACTGTGATCAGAGTAAATGAAAATTTCACATT	TCATTTACTCTGATCACAGTTAAATTGTGCCCCAAGTATAGTGGCGCACG													0.825403	0.846057	0.0206541	759	396	1155
cg03035871	0.299589	-4.51501	3.4706	0.000840783	0.999978	-1.1716	chr14	50100940	-	58778399	49794375	CTAAATACAAAAACAAAAACCACAACCAATAATCAAATTTCCTCAAATCA	CTAAATACGAAAACGAAAACCGCAACCGATAATCAAATTTCCTCGAATCG	I	A	Red	NA	NA	NA	NA	NA	NA	chr14:50100315-50102009	Island	GGCCATCGTCCACTGGGTACGGGAGCGAGAGCCGCAGCCGGTAGTCAGGTTTCCTCGAGT[CG]AGGCACAGCAGCTTTCTCGTTACCTCCAGCGCCGCCTGCTCGGCCGAGCGCAACAGCGGC	CTGGGTACGGGAGCGAGAGCCGCAGCCGGTAGTCAGGTTTCCTCGAGTCG			C14orf104;C14orf104	NM_001083908;NM_018139	1stExon;1stExon	high-CpG:49170408-49170791			14:49169983-49171759	14:50100225-50101419	Promoter_Associated		0.0464465	0.037601	0.00884546	297	860	1157
cg10494703	-0.219059	2.8141	-3.20735	0.00192873	0.999978	-1.72343	chr4	184032120	-	27679328		ATTAATACTACAAACCCCTAATTAAAATCCTAATTTACAAAACTAAACTC		II			NA	NA	NA	NA	NA	NA		OpenSea	GAATTATAGAGATTGGTGCTACAAACCCCTGATTAAAATCCTGATTTACAGGGCTGGGCT[CG]GTGGCTCACGCCTGTAATCCTAGCACTTTGGGAGGCTGAGGCGGGCGGATCACGAGGTCA	TTGGTGCTACAAACCCCTGATTAAAATCCTGATTTACAGGGCTGGGCTCG			WWC2	NM_024949	Body			TRUE					0.867433	0.884703	0.0172705	668	491	1159
cg05908371	-0.200388	-3.21992	-3.30014	0.00144615	0.999978	-1.53233	chr20	25129529	+	64642332		TACAAAACCAAACAAACRAACTACTAACTACAACTTCRCTATAATCTACC		II			NA	NA	NA	NA	NA	NA	chr20:25128764-25129610	Island	CATCCCCGTGCGCACGTGTTCGCTGTGCTAGCCCCGTGCGAGCTGAGCTGCCGTTAGAGT[CG]GTAGATTACAGCGAAGCTGCAGTCAGCAGCTCGTCTGCCTGGCCCTGCACACCGTGAGAC	CGGTAGATTACAGCGAAGCTGCAGTCAGCAGCTCGTCTGCCTGGCCCTGC			LOC284798;LOC284798;LOC284798	NR_027093;NR_027092;NR_027091	TSS1500;TSS200;TSS200		DMR	TRUE	20:25076584-25077610	20:25128787-25129737	Unclassified_Cell_type_specific	TRUE	0.0934544	0.106498	0.0130437	497	664	1161
cg17321214	0.263223	-2.99364	3.22726	0.00181399	0.999978	-1.68276	chr18	42260121	-	52699494	22810376	ATTTTCCCCCTTAATATCTCTCTCCATAAATCAATAACACAACAAAAACA	ATTTTCCCCCTTAATATCTCTCTCCATAAATCGATAACGCGACGAAAACG	I	A	Red	NA	NA	NA	NA	NA	NA	chr18:42258983-42260795	Island	TCCGGAGACGCCATTTTCCCCCTTGATATCTCTCTCCATAAATCGGTGGCGCGGCGGAGG[CG]GCAGAGTCGGGCGGGAAGCGCGGGGCCGGCCGGGGCGCCCGCCGCTCGCCGCCGCCTCCG	CGCCTCCGCCGCGCCACCGATTTATGGAGAGAGATATCAAGGGGGAAAAT			SETBP1;SETBP1	NM_001130110;NM_015559	TSS200;TSS1500	high-CpG:40513052-40514335			18:40513972-40514793	18:42259936-42260316	Unclassified_Cell_type_specific		0.119722	0.10366	0.0160622	629	533	1162
cg01192875	-0.150731	0.731562	-3.13973	0.00237121	0.999978	-1.86027	chr15	65578195	+	26640469		AATTATCCATCCTTTTACAAATAATTAAACACCAAAAAATCACCAAAACC		II			NA	NA	NA	NA	NA	NA	chr15:65578613-65579490	N_Shore	ATGTTACAGTTTATAAAAGTACTGCCCATAGATCACCTCATCTGAAGACCAATGTCTGGG[CG]GCTTTGGTGACTTTTTGGTGTCTAATTATTTGCAAAAGGATGGATAACTTTCTAGCTAAG	GTTATCCATCCTTTTGCAAATAATTAGACACCAAAAAGTCACCAAAGCCG			PARP16	NM_017851	Body					15:65578019-65579962	Promoter_Associated		0.615187	0.638185	0.0229984	830	333	1163
cg15156614	0.181496	-3.79136	3.54536	0.000659297	0.999978	-1.00961	chr1	59248148	-	17697331		ATCTACTAAAACAAATAATACRACRACTACTACTACTACTAAAATTACRC		II			NA	NA	NA	NA	NA	NA	chr1:59247461-59250940	Island	GCTGCACGGGCATCTGCTGGGGCAGGTGGTGCGGCGGCTGCTGCTGCTGCTGGGGTTGCG[CG]GGAAAGGCCAGGCCGGCCGCGCCGTAGGAGGGCGCCCCGCCGCCGCTGCTCAGCGCGCCT	CGCGCAACCCCAGCAGCAGCAGCAGCCGCCGCACCACCTGCCCCAGCAGA			JUN	NM_002228	1stExon				1:59020305-59023712	1:59248049-59248301	Promoter_Associated_Cell_type_specific		0.070575	0.0635372	0.00703779	232	932	1164
cg23297230	0.158823	2.37142	3.24327	0.00172638	0.999978	-1.64992	chr14	100849016	+	52602470		AACTAACATTTAATTAACACCCRCTACATATCAAATACTTTACTAACTAC		II			NA	NA	NA	NA	NA	NA		OpenSea	CCCACCTGGGACCTGTCTCCAGCCCTTCGAGCTGTGCACTGCATCCCTCCTCTCTCTCCT[CG]CAGCTAGCAAAGCACCTGATATGTAGCGGGTGCCAACTAAATGCTAGCTGAACAGAAAGC	CGCAGCTAGCAAAGCACCTGATATGTAGCGGGTGCCAACTAAATGCTAGC			WDR25;WDR25	NM_024515;NM_001161476	Body;Body			TRUE					0.842728	0.827159	0.0155691	604	560	1164
cg05457480	0.189398	0.626905	3.08162	0.00282532	0.999978	-1.97618	chr5	139139201	-	62752507		ATTTCCCCACTAAATTAATCTACAATAACTAAAAATAACCTTCTAAAAAC		II			NA	NA	NA	NA	NA	NA	chr5:139138875-139139242	Island	TACGGAAAGAAGTTTCCCCACTGAGTTAATCTGCAGTGGCTGGAGGTGACCTTCTGGAGA[CG]GCGATTAATCACGGGCCGTGGCGGGCGCCGCGCCACGCCGGGCCCTTTGGGGGAATACTA	TTTCCCCACTGAGTTAATCTGCAGTGGCTGGAGGTGACCTTCTGGAGACG									5:139119060-139119426				0.617081	0.586916	0.0301646	987	179	1166
cg07109358	0.103136	2.66232	3.48618	0.000799451	0.999978	-1.13803	chr4	7774727	+	13752367	39632496	TACCTACCACAAAAATAACAACATTTCTAAAAATTCCAAACAAAAAACCA	TACCTACCGCGAAAATAACGACGTTTCTAAAAATTCCAAACAAAAAACCG	I	C	Grn	NA	NA	NA	NA	NA	NA	chr4:7774495-7774769	Island	CGCCTCCTTCTGCCGGCACTCCTCCTCCAGCTGCTTCAGCTTCTCCTCCAGGATCGCCTG[CG]GCTTCCTGCCTGGAATTCCCAGAAACGCCGTTACTCCCGCGGCAGGCACAGGTTCTCCAA	CGGCTTCCTGCCTGGAATTCCCAGAAACGCCGTTACTCCCGCGGCAGGCA			AFAP1;AFAP1;LOC84740	NM_198595;NM_001134647;NR_026892	Body;Body;Body				4:7825278-7826031				0.866307	0.858071	0.00823577	284	883	1167
cg05102668	0.176713	2.26003	3.22997	0.00179883	0.999978	-1.67719	chr18	76541148	-	17765460		CTCAAATTTCCCTAAAAATAAAAACTACAAATAATACCTCAACACATTCC		II			NA	NA	NA	NA	NA	NA	chr18:76541147-76541888	Island	CCACCCGGCATCTCAGATTTCCCTGGAAATGGAAACTGCAGGTGGTGCCTCAGCACATTC[CG]AGGCGTTCCCGTGGCTGGATGTTTCTCACGCGGTGAGGTGAAGAACGAGTCACCTGTTTA	CGGAATGTGCTGAGGCACCACCTGCAGTTTCCATTTCCAGGGAAATCTGA									18:74641967-74643867				0.831806	0.815853	0.0159535	626	543	1169
cg16329658	0.184831	0.796334	3.1245	0.00248318	0.999978	-1.89081	chr7	157258677	+	47708480	60741437	AATCACCCCATAACACCCAACCTCAATTATCAAAAATTTTACCTACTTCA	AATCACCCCGTAACACCCGACCTCAATTATCGAAAATTTTACCTACTTCG	I	T	Red	rs114096142	0.01477	NA	NA	NA	NA	chr7:157260938-157261221	N_Shelf	GGCTTTCCCGCCAGCGTCTACCTGTAGAGAGTGAGACGAAGATGGAGACAATTAACTGGA[CG]AAGCAGGCAAAATCCCCGATAATTGAGGCCGGGTGCCACGGGGTGACTTTCCCTTTCTGG	AGTCACCCCGTGGCACCCGGCCTCAATTATCGGGGATTTTGCCTGCTTCG									7:156951377-156951632				0.642334	0.618195	0.0241391	868	301	1169
cg21997465	0.185247	1.40501	3.11606	0.00254732	0.999978	-1.90768	chr1	203055662	+	72786301		ATACTAAATACCCATAAATACCCAAAATCTAAAACAATCCCATTCTTTCC		II			NA	NA	NA	NA	NA	NA		OpenSea	TCCTGACAGCACCTTAACCACACTACATCAGTCGATGAGACTCTTTTAAAGACTTCCCTC[CG]GAAAGAATGGGACTGCTTCAGATTCTGGGCATTCATGGGCACTCAGTATCCAGGGATAAG	TACTGAGTGCCCATGAATGCCCAGAATCTGAAGCAGTCCCATTCTTTCCG			MYOG	NM_002479	TSS1500					1:203055591-203055792	Unclassified_Cell_type_specific		0.733546	0.708591	0.0249548	886	284	1170
cg09165964	0.287709	-3.04894	3.17884	0.00210492	0.999978	-1.78137	chr15	75287851	-	16789326	34732503	TTAAAAACAAAACAAAAATCTCACAAAAATAACTACTACAAACAATAACA	TTAAAAACAAAACGAAAATCTCGCGAAAATAACTACTACAAACAATAACG	I	A	Red	rs12911421	0.411143	NA	NA	NA	NA	chr15:75287694-75288699	Island	GGAGGAGCAGCCTTAGGAGCAGAGCGGAAGTCTCGCGAGAGTGACTGCTGCAGGCAGTGG[CG]GCGCGGGCGCGCGCAGAGACGGCCTCGGGCGCGCGCGCGCGCGCGCGCGCTCCCCGCCCC	TTAGGAGCAGAGCGGAAGTCTCGCGAGAGTGACTGCTGCAGGCAGTGGCG			SCAMP5	NM_138967	TSS200	high-CpG:73074882-73075038			15:73074764-73075705	15:75287332-75288611	Promoter_Associated		0.117795	0.0984332	0.0193615	743	430	1173
cg10424417	0.207302	-2.26969	3.15276	0.00227921	0.999978	-1.83407	chr5	87989191	+	58730385		ACAAAAAATAAATCCTTTCTATACRCCCCAAATAATACCAAAAATAATTC		II			NA	NA	NA	NA	NA	NA	chr5:87985470-87985810	S_Shelf	CAAGGATTCACTAACATTCCTACCGGCCTTGCTTAACCTCCATGCCCCCGGGAAGTGGCG[CG]AATCACTCTTGGCACCACTTGGGGCGCACAGAAAGGACCCACCTCCTGTTGGCCAGGCAA	CAGGAGGTGGGTCCTTTCTGTGCGCCCCAAGTGGTGCCAAGAGTGATTCG							RDMR		5:88024910-88024948	5:87988274-87989323	Unclassified_Cell_type_specific		0.181301	0.160192	0.021109	790	383	1173
cg24590723	0.201028	2.39655	3.17937	0.0021015	0.999978	-1.7803	chr3	54355910	-	67694502		AAAAACATTTCTATCCAAATAAAATTATACCAATTCACAACTACTCCAAC		II			rs76823671	0.013724	NA	NA	NA	NA		OpenSea	TTTATGCATATGAAAGCATTTCTGTCCAGATAAGGTTGTGCCAATTCACAGCTGCTCCAG[CG]ACAGTGGTGTGCAAGTGCTTATTTTCTGAAATCCTTGCAAAAAAAAAAAAAAAAAAAACT	CGCTGGAGCAGCTGTGAATTGGCACAACCTTATCTGGACAGAAATGCTTT			CACNA2D3	NM_018398	Body			TRUE					0.845709	0.826511	0.0191979	739	435	1174
cg03935359	0.178992	2.22231	3.18282	0.00207948	0.999978	-1.77332	chr1	68363156	-	69761370		ATAATTATAATATCTACCTACTTCCCCTCTAACTTATCTAATAATCCCAC		II			NA	NA	NA	NA	NA	NA		OpenSea	CCACGTGGCCAATGGTTGTGGTATCTGCCTGCTTCCCCTCTGGCTTGTCTGATGGTCCCA[CG]AAGAGGCTGGAAGGCGAACTTTTCTGGGACTGTCTCCATGGGGACTTGGAATGTAATAGA	CGTGGGACCATCAGACAAGCCAGAGGGGAAGCAGGCAGATACCACAACCA								TRUE					0.82905	0.81012	0.0189299	732	445	1177
cg16498533	0.331398	-2.87268	3.16422	0.00220103	0.999978	-1.81095	chr6	74230343	+	48641498	62774364	TACAAACCAAAATCTACACACTAATATTTCAATTTTTAAAACCACAAACA	TACGAACCAAAATCTACACACTAATATTTCGATTTTTAAAACCGCGAACG	I	A	Red	NA	NA	NA	NA	NA	NA	chr6:74229962-74231497	Island	GCCGCGCTCGCAGGCCCCGCCTCGCCGAACATGTGCGCTGGGACGCACGGGCCCCGTCGC[CG]CCCGCGGCCCCAAAAACCGAAATACCAGTGTGCAGATCTTGGCCCGCATTTACAAGACTA	CGCCCGCGGCCCCAAAAACCGAAATACCAGTGTGCAGATCTTGGCCCGCA			EEF1A1	NM_001402	5'UTR				6:74286684-74287111	6:74229749-74231667	Promoter_Associated		0.131416	0.111348	0.0200684	766	411	1177
cg09135741	0.167334	-3.05071	3.39699	0.00106488	0.999978	-1.32888	chr10	104263683	-	36754509		ATAACTAACACAAACATTAACCAATAAATACTTAAATAAAATACRCCRAC		II			rs3818470	0.324829	NA	NA	NA	NA	chr10:104263676-104264155	Island	CTTCCCTGCCTGTGACTGGCACAGACATTAGCCAATGGGTGCTTGGATAGGGTGCGCCGG[CG]CCCCGCCCCCCTTAGCGCCCCGCCGCCCCGAGGCACCCTCTGGCAGACTCGGCGGCGGCG	TGACTGGCACAGACATTAGCCAATGGGTGCTTGGATAGGGTGCGCCGGCG			ACTR1A;SUFU	NM_005736;NM_016169	TSS1500;TSS200				10:104253667-104254465	10:104263259-104264879	Promoter_Associated		0.112208	0.102071	0.0101369	376	802	1178
cg07651364	-0.265908	-2.64887	-3.1494	0.00230261	0.999978	-1.84083	chr18	12991164	+	58682423	71732341	AAAAAAAACCCAATAATTAATAAAAACAACACATTCCTAAATTTAAAACA	AAAAAAAACCCGATAATTAATAAAAACAACGCGTTCCTAAATTTAAAACG	I	A	Red	NA	NA	NA	NA	NA	NA	chr18:12991061-12991696	Island	GGTCCCACGCAGCGCAGAGCTCCATTTCCTCCTCCGGACTCGCAGGGCGCGCGGCTTCCT[CG]CTTCAAATCCAGGAACGCGCTGTCCCCACCAATCACCGGGCTTCTTCCCGCCCCATGTCT	CGCTTCAAATCCAGGAACGCGCTGTCCCCACCAATCACCGGGCTTCTTCC			CEP192	NM_032142	TSS200				18:12980833-12981784	18:12990736-12992014	Promoter_Associated		0.13261	0.153904	0.0212936	800	378	1178
cg01389761	0.136823	-3.16645	3.42633	0.000969555	0.999978	-1.26648	chr3	169482968	+	11684351		CRAAAAAACAACRTCCTTCCTCATAACCRAAAATAAAACTTTAATTTCCC		II			NA	NA	NA	NA	NA	NA	chr3:169482338-169483052	Island	CAAGCTGACTCTCGCGGCTCTCGTGAGAGTCACTCTCTCGGGCGGGCTGGTTGGGGGGAA[CG]GGAAATTAAAGTTCCATTTCCGGCCATGAGGAAGGACGTTGCCCTTCCGCACGTCCGGGA	CGGGAAATTAAAGTTCCATTTCCGGCCATGAGGAAGGACGTTGCCCTTCC		TRUE	TERC	NR_001566	TSS200				3:170964884-170965746	3:169481981-169483408	Unclassified		0.104129	0.0947734	0.00935516	340	839	1179
cg09965668	0.258793	3.59223	3.27969	0.00154158	0.999978	-1.57477	chr4	1977395	-	13702497	67808439	ACCTCACAAACACATAATTTCACAATTCTAAATATAAACAAAACCATACA	ACCTCACAAACGCGTAATTTCGCAATTCTAAATATAAACAAAACCGTACG	I	C	Grn	rs75304584	0.022589	NA	NA	NA	NA	chr4:1980580-1980834	N_Shelf	TGCCAGAACAATGCCTCACAGACGCGTGGTTTCGCAGTTCTGGGTGTGGGCAGGGCCGTG[CG]CCCTCTGAAGGTTCCTTGGGAGGCTCTTTCCCAGGCCTGTCTCCCGTTCCTGGTGGCGGC	GCCTCACAGACGCGTGGTTTCGCAGTTCTGGGTGTGGGCAGGGCCGTGCG			WHSC1;WHSC1;WHSC1;WHSC1	NM_001042424;NM_133330;NM_133331;NM_133335	Body;Body;Body;Body								0.926506	0.913153	0.013353	528	653	1181
cg07602744	-0.224319	-3.78709	-3.30268	0.0014347	0.999978	-1.52705	chr7	157484164	-	67678387		CRAACCTTTTTACTCCCTTTCCAAATAAAAACAAACCAATAATTCAAAAC		II			NA	NA	NA	NA	NA	NA	chr7:157476886-157486719	Island	GTGTTGCCGTTCGGGCCTTTTTGCTCCCTTTCCAAATGGAAGCAGGCCAATGATTCAGGG[CG]AGTAGACGAGAGCCCCTCTGCTCACTTTACCAGGGTCCTCCCGAGTGTTTAGGTCCCGAT	CGCCCTGAATCATTGGCCTGCTTCCATTTGGAAAGGGAGCAAAAAGGCCC			PTPRN2;PTPRN2;PTPRN2	NM_002847;NM_130842;NM_130843	Body;Body;Body		CDMR		7:157174012-157179480				0.0643313	0.0769715	0.0126402	492	691	1183
cg25049844	-0.198137	1.42806	-3.08947	0.00275958	0.999978	-1.96062	chr21	46933374	+	14774418		TAACAAAAAACCTTATTACACCTCRTAACTACTTTATTCACCCRCAAAAC		II			NA	NA	NA	NA	NA	NA	chr21:46932081-46932387	S_Shore	AGGAAACCCATATCCTTACCCTCCTTGGGACTGAAGGGGAACCCCGGGGTGCCCACAGGC[CG]CCCTGCGGGTGAACAAAGCAGCCACGAGGTGCAACAAGGTCCTCTGTCAGTCACAGCCAC	CGCCCTGCGGGTGAACAAAGCAGCCACGAGGTGCAACAAGGTCCTCTGTC			COL18A1;COL18A1;COL18A1	NM_030582;NM_130444;NM_130445	3'UTR;3'UTR;3'UTR							TRUE	0.717084	0.745293	0.0282092	970	213	1183
cg12457035	-0.201685	-2.70286	-3.22932	0.00180247	0.999978	-1.67853	chr5	180688144	+	53631396	72660410	ACCTAAAACATCTCTCCAAAACATATACAAAAACAAAACATCATTTTACA	ACCTAAAACGTCTCTCCAAAACGTATACAAAAACGAAACGTCATTTTACG	I	T	Red	NA	NA	NA	NA	NA	NA	chr5:180688051-180688962	Island	TGTGCCCTACACTGCGGCGTCCGCCTCAGATGCAGCCGCTGGCTACCCTGCCCGAGGCGA[CG]CAAAATGACGTCTCGCTCCTGCACACGCTCTGGAGAGACGCTCTAGGCCGGCGGAGGACC	CGCAAAATGACGTCTCGCTCCTGCACACGCTCTGGAGAGACGCTCTAGGC			TRIM52	NM_032765	TSS200	high-CpG:180620721-180620761			5:180619908-180621568	5:180687668-180689292	Promoter_Associated		0.128983	0.144574	0.0155911	627	559	1186
cg19378640	0.252913	-2.06451	3.09651	0.00270181	0.999978	-1.94663	chr1	109656145	-	19800305	30807509	ATACAACACTTAAAAAATTACAACTAAAACAAACTCCTCACTTAAACTCA	GTACGACGCTTAAAAAATTACGACTAAAACAAACTCCTCGCTTAAACTCG	I	A	Red	NA	NA	NA	NA	NA	NA	chr1:109656095-109656611	Island	AGAGAGGCCCACGTGCGGCGCTTGGGAAATTGCGGCTAAGGCAAACTCCTCGCTTAAACT[CG]GATCAACTACAGTGTCAGGGCTTCTCTTCTAGCCGGTTGTAAAAGCACGGATGGATTTGG	GTGCGGCGCTTGGGAAATTGCGGCTAAGGCAAACTCCTCGCTTAAACTCG			C1orf194;KIAA1324	NM_001122961;NM_020775	Body;TSS1500			TRUE	1:109457619-109458575	1:109656064-109657490	Promoter_Associated		0.205562	0.178887	0.0266754	942	244	1186
cg04494197	-0.23283	3.55895	-3.32789	0.00132551	0.999978	-1.47446	chr11	1011415	-	49645349		RATAACRCAAAACTCAAAAATATACTCRTCTCTTTCCTATCAAAATAAAC		II			NA	NA	NA	NA	NA	NA	chr11:1009403-1009649	S_Shore	AAGTGTGGGCCGGTGGCGCAAGACTCAGAGGTGTGCTCGTCTCTTTCCTGTCAGAGTGGG[CG]TCCCCAGGCCACGGTGCAGGCCTGAGTCCTTCCACCGGCCCCGTCCAGTCGTCCCTGGAG	CGCCCACTCTGACAGGAAAGAGACGAGCACACCTCTGAGTCTTGCGCCAC			AP2A2	NM_012305	3'UTR				11:1001217-1001453			TRUE	0.916134	0.927796	0.0116614	455	732	1187
cg04250867	0.272818	-3.15544	3.20128	0.00196503	0.999978	-1.73579	chr11	126081485	-	30656353	62803333	CACAAAATAACTTTAAAACAAAAATAAAAAAACTCCCACAACCTTAACCA	CACAAAATAACTTTAAAACGAAAATAAAAAAACTCCCGCAACCTTAACCG	I	T	Red	NA	NA	NA	NA	NA	NA	chr11:126081369-126082028	Island	CAGCGGCAGCGGCACAAAATGGCTTTGAGACGAGAGTGAAGAGACTCCCGCAACCTTGGC[CG]TTTCCCCGGATCCAGGGGCCCGACGCGCTCCACCTGGGCGCCGCCATCTTACAAGGAAGG	CGGCCAAGGTTGCGGGAGTCTCTTCACTCTCGTCTCAAAGCCATTTTGTG			RPUSD4;RPUSD4;FAM118B	NM_001144827;NM_032795;NM_024556	1stExon;1stExon;TSS200				11:125585981-125587230	11:126080920-126082559	Promoter_Associated		0.109553	0.0925945	0.0169581	682	505	1187
cg19287823	0.187651	-1.90418	3.1507	0.00229354	0.999978	-1.83822	chr6	155316843	+	36751436	46750418	TTTCAAAACCTTCTAAAAAATACTTCATCCCCCATACCAAACTATACCCA	TTTCAAAACCTTCTAAAAAATACTTCGTCCCCCGTACCAAACTATACCCG	I	A	Red	NA	NA	NA	NA	NA	NA	chr6:155316299-155317197	Island	GCGGAAGGTCGCGGCTGCGGGGCGCGGCCTGGCACCCTCTCCCCGGAGGGCGGCAGCGTC[CG]GGCACAGCCTGGCACGGGGGACGAAGCACTTTCCAGAAGGCTCTGAAACTAGGTCCCCTG	CGGGCACAGCCTGGCACGGGGGACGAAGCACTTTCCAGAAGGCTCTGAAA									6:155357715-155358935			TRUE	0.219929	0.19914	0.0207888	798	390	1188
cg21656748	-0.312257	-4.50337	-3.46194	0.000864634	0.999978	-1.19023	chr4	77135347	+	15741487	12678407	CTACATTATATTATAATTACAATAACAATATCCCCACTAACTTACAAACA	CTACATTATATTATAATTACGATAACGATATCCCCGCTAACTTACGAACG	I	C	Grn	NA	NA	NA	NA	NA	NA	chr4:77134566-77135377	Island	CCTCCCATGGGCCACGCGCTGGGGATTCAAGGTGGCTGGGACATTCCCCTGCTCTAGAGG[CG]CTCGCAAGTTAGCGGGGACACCGTTACCGCAATTACAACACAATGTAGCAAGTGCTTCTA	CTACATTGTGTTGTAATTGCGGTAACGGTGTCCCCGCTAACTTGCGAGCG		TRUE	SCARB2	NM_005506	TSS1500					4:77134885-77135559	Promoter_Associated		0.0406533	0.048972	0.00831874	310	880	1190
cg03017520	0.271586	-2.15723	3.10665	0.00262059	0.999978	-1.92644	chr18	28623090	+	53659454	34749510	ATTCCTAACATCCAACAAAACCCATATCAAAACAAAAATCCCTACAAACA	ATTCCTAACATCCAACAAAACCCGTATCGAAACAAAAATCCCTACGAACG	I	A	Red	NA	NA	NA	NA	NA	NA	chr18:28621489-28623117	Island	CGTCCCAGGGCGGCCCCATCGCCGGCGCTGCGCGGTGCATCTCAATGCAGAACCCCAATC[CG]CCCGCAGGGATCCCTGCCTCGACACGGGCTCTGCTGGATGCCAGGAACACCCTTGTCATT	CGCCCGCAGGGATCCCTGCCTCGACACGGGCTCTGCTGGATGCCAGGAAC			DSC3;DSC3	NM_001941;NM_024423	TSS1500;TSS1500				18:26875488-26877115	18:28623000-28623190	Unclassified	TRUE	0.195567	0.170437	0.0251301	912	279	1191
cg02848777	0.27049	-3.96538	3.36371	0.00118371	0.999978	-1.39924	chr10	98273714	-	65654415	60646432	TACAACAACTACAAATATAACAATAACAACAATAATTAAAACAATAACCA	TACGACGACTACGAATATAACGATAACGACGATAATTAAAACAATAACCG	I	C	Grn	NA	NA	NA	NA	NA	NA	chr10:98272207-98273939	Island	GGCGGCCGAGGCTGCGGCGGCTGCGAGTGTGGCGGTGGCGGCGGTGGTTGGAGCAGTGGC[CG]CTCCGCCCCTCTCCACCAGGGCTGGACCACACAGCCTTCGCCCGGGGCCCTAAGCAGCCA	CGGCCACTGCTCCAACCACCGCCGCCACCGCCACACTCGCAGCCGCCGCA		TRUE	TLL2	NM_012465	TSS200				10:98262850-98264231	10:98272391-98274464	Unclassified		0.0655457	0.054938	0.0106077	413	783	1196
cg12305545	0.214609	3.05543	3.25987	0.00163971	0.999978	-1.61574	chr19	40472727	-	52639331		CTCTCATATAACTTCTAAAAACATAAACTACAACCACCTATATAAAAACC		II			NA	NA	NA	NA	NA	NA	chr19:40476511-40476928	N_Shelf	ATGGGATTTTGCTCTCATGTAACTTCTGAGAACATGAGCTGCAGCCACCTGTATAAAAAC[CG]CAGGCTGAAACCCTCCGGAGCAGTCCAACGGTTACTTTGAAAGACTCTCCCAGGTTGTGA	TCTCATGTAACTTCTGAGAACATGAGCTGCAGCCACCTGTATAAAAACCG													0.896004	0.882485	0.0135187	558	639	1197
cg02031712	-0.256376	2.93463	-3.1916	0.0020243	0.999978	-1.75549	chr17	113799	+	20636301		TAAAATCTAATCAAAAATCCCCRCCCAACCATCTTAAAAAACAACATCRC		II			rs114084543	0.01477	NA	NA	NA	NA	chr17:113664-113881	Island	GGCAGGCAGAGCTGGGTCCAGCAGGAAACAAGGGCCTGAGGGTATCGTGCTGTTAGCGGA[CG]CGATGCTGCTTTCCAAGATGGCTGGGCGGGGATCTCTGATCAGATTTCAAAGCCACGATT	CGCGATGCTGCTTTCCAAGATGGCTGGGCGGGGATCTCTGATCAGATTTC			RPH3AL	NM_006987	Body				17:113580-114353				0.875645	0.89308	0.0174348	712	485	1197
cg16958667	-0.176132	2.90247	-3.29321	0.00147788	0.999978	-1.54674	chr6	161863721	-	38773385		AACRAACTAAACTCCCAACTAAAAATAACTTAAAATTTAACTATTCCTTC		II			NA	NA	NA	NA	NA	NA		OpenSea	GTCTTGGACTGGACGGGCTGGACTCCCAGCTGAAGGTGGCTTGGAATTTAGCTGTTCCTT[CG]GGGCCCCGCTTACACACCAACACCCATGAATGCTTTTCAACGAAGTTGCTAGAATGCAGC	ACGGGCTGGACTCCCAGCTGAAGGTGGCTTGGAATTTAGCTGTTCCTTCG			PARK2;PARK2;PARK2	NM_004562;NM_013987;NM_013988	Body;Body;Body				6:161783592-161783774				0.876395	0.889093	0.0126972	511	689	1200
cg06281904	-0.235313	3.20199	-3.24568	0.00171353	0.999978	-1.64496	chr2	37041582	-	37613504		ACTACTTTACTAACTAACRTATTAAACCACCCCACCRCTTAATAAAACAC		II			NA	NA	NA	NA	NA	NA		OpenSea	CACCAGCAAGTGCTGCTTTACTAACTGACGTGTTGGACCACCCCACCGCTTAATGGGGCA[CG]CACGGTGCATCAAGTCTTGGGCAGGGCATGGAGAAACAAATGTCTTGTTATTATTCTTTG	CTGCTTTACTAACTGACGTGTTGGACCACCCCACCGCTTAATGGGGCACG			VIT	NM_053276	3'UTR								0.895053	0.909372	0.0143193	598	602	1200
cg20684251	-0.193358	3.3476	-3.34397	0.00125999	0.999978	-1.44076	chr19	51840554	-	31762420		CCRACTTTATAATAAAATCCCTAACTAACCCCCCAAAATAAACAAAATCC		II			NA	NA	NA	NA	NA	NA	chr19:51842128-51842353	N_Shore	GCCCGGTAGACCCGGCTTTGTGATGGAGTCCCTGGCTGGCCCCCCAGGATGGGCAGGATC[CG]AAAGGTCCAGGTCCCTGGGTTCCGAGGTGGAAGGGGCACCACGGCTGACCGCTCCTGAGG	CGGATCCTGCCCATCCTGGGGGGCCAGCCAGGGACTCCATCACAAAGCCG			VSIG10L	NM_001163922	Body								0.905579	0.916434	0.0108548	434	772	1206
cg14260355	-0.175031	-3.21152	-3.32484	0.00133827	0.999978	-1.48082	chr14	77423234	-	48729460		AACTCTTCCTTCCCTTCCCTCCAACAAAAATATATAACRTAAATATATAC		II			NA	NA	NA	NA	NA	NA	chr14:77422842-77423094	S_Shore	AATGAGGCAGAGGCTCTTCCTTCCCTTCCCTCCAGCAGGGGTGTGTGGCGTGGGTGTGTG[CG]GGTGTGGCAGGGTCTGTCTGTATGTCTGATGCCTGTCCATCACCGGTGTATATTTTCGCG	GCTCTTCCTTCCCTTCCCTCCAGCAGGGGTGTGTGGCGTGGGTGTGTGCG								TRUE		14:77422079-77424026	Promoter_Associated		0.094228	0.105507	0.0112785	459	748	1207
cg16240260	-0.293787	2.27579	-3.09592	0.00270665	0.999978	-1.94781	chr3	137725933	+	22611480		TAATTTAATTTTCAAATATTCAATTTATAACATTTATCTAACCTTCCCCC		II			NA	NA	NA	NA	NA	NA	chr3:137728994-137729206	N_Shelf	TTATTTTTCCATCTTCAATCTATGTTTTTGGTGGTATTCTAACACATGTATATGTATTGT[CG]GGGGAAGGTTAGACAAATGTCATAAATTGAACATCTGAAAATCAAACCAATAGAGCTTTT	CGGGGGAAGGTTAGACAAATGTCATAAATTGAACATCTGAAAATCAAACC			CLDN18	NM_001002026	Body								0.815679	0.841407	0.0257287	945	262	1207
cg26053840	-0.209025	3.13759	-3.27176	0.00158015	0.999978	-1.59118	chr6	38644662	-	37735377		AATAAACACTTTATACTTTACTAAAAAAACACTAATATTCTTTCCTTTCC		II			NA	NA	NA	NA	NA	NA		OpenSea	CTCTTTTGTAAAATAAACACTTTGTACTTTACTGAAAGAACACTAGTGTTCTTTCCTTTC[CG]TTGTGAAAAAAGTTGTTTCTGAGGAATTGAAACCCCAGAAGATAACTACAACAAAAACAT	CGGAAAGGAAAGAACACTAGTGTTCTTTCAGTAAAGTACAAAGTGTTTAT			GLO1	NM_006708	3'UTR								0.891875	0.904899	0.0130235	541	667	1208
cg23426945	-0.305742	-2.72233	-3.10335	0.00264681	0.999978	-1.93303	chr10	77190054	-	13632332	63645468	AAAACTAAACTAAAAAACAACTACAAAAAACAAAATACTAACTAAATCCA	AAAACTAAACTAAAAAACAACTACGAAAAACAAAATACTAACTAAATCCG	I	A	Red	NA	NA	NA	NA	NA	NA	chr10:77191061-77191571	N_Shore	AGCCCTTCTAGGAAAGCTGAGCTGAAAGGCAGCTGCGGAGGGCAGAGTGCTGGCTGGGTC[CG]GGCTCACTTCCTCCTTTTCAGGCAGGAAAAGCAGACAAAAGTGCACAATGGACCAGAGAG	AAAGCTGAGCTGAAAGGCAGCTGCGGAGGGCAGAGTGCTGGCTGGGTCCG							RDMR	TRUE		10:77189939-77190177	Unclassified_Cell_type_specific	TRUE	0.12638	0.151148	0.0247684	920	288	1208
cg17974780	-0.24669	-3.83094	-3.39743	0.00106341	0.999978	-1.32796	chr7	73184617	-	37808346	42617372	TAACTTTATAAACAAACAACAACAACTAAACTAACCCTAAACTAAAACCA	TAACTTTATAAACGAACGACGACGACTAAACTAACCCTAAACTAAAACCG	I	A	Red	NA	NA	NA	NA	NA	NA	chr7:73183379-73185115	Island	TGCACCTGCCTGTGGCTTTGTGGGCGGGCGGCGGCGACTGGGCTGGCCCTGGGCTGGGGC[CG]GTGCGTCTTAGCTAAGTGCCCAGCGCTCCGGTGGGGGCGGTAGGGGCGGAGCCGCGCTCT	CGGCCCCAGCCCAGGGCCAGCCCAGTCGCCGCCGCCCGCCCACAAAGCCA			CLDN3	NM_001306	TSS200			TRUE	7:72820924-72823026			TRUE	0.0635653	0.0730272	0.00946182	375	834	1209
cg22495726	-0.224733	2.72	-3.19146	0.00202514	0.999978	-1.75577	chr4	190771160	-	13665498		CAACACAAAACAAACAAAAAAATCATCCTACAACATACAATCTAAATAAC		II			NA	NA	NA	NA	NA	NA	chr4:190767204-190767597	S_Shelf	CCTAGACAGCTCAGCACAGGACAAACAGAAAGGTCATCCTGCAACATGCAATCTAGATGA[CG]AAGAAAGATAACTCAAATGAGACACCTCAGAGACCTCTGTTCTCCAGTTCTGGCTCTGAT	CGTCATCTAGATTGCATGTTGCAGGATGACCTTTCTGTTTGTCCTGTGCT													0.860097	0.87725	0.0171527	713	497	1210
cg22088594	-0.194631	-3.19804	-3.30292	0.00143362	0.999978	-1.52655	chr13	37634133	-	43665439		ACTAACTTTTCTCTTTACTTAACACATACAAATAAAAAAACAACRACACC		II			NA	NA	NA	NA	NA	NA	chr13:37633395-37633966	S_Shore	AGAAACATAGAACTAGCTTTTCTCTTTGCTTAGCACATACAAATGGAAAAACAGCGACAC[CG]TTACCTACATTTACTAGTCCAATGCGTACAACCTTCTGTAGTATATCAACTGCCAATGAG	CGGTGTCGCTGTTTTTCCATTTGTATGTGCTAAGCAAAGAGAAAAGCTAG		TRUE	FAM48A;FAM48A	NM_017569;NM_001014286	TSS1500;TSS1500					13:37632712-37634363	Promoter_Associated		0.0950813	0.106965	0.0118834	490	721	1211
cg18557131	0.230186	-2.56129	3.14159	0.00235785	0.999978	-1.85653	chr13	100624207	+	66626427	26759356	CAAATACAACTTAAACATCCCCAAAAAAACAAAAACATATAACTCCAACA	CAAATACAACTTAAACATCCCCGAAAAAACGAAAACGTATAACTCCAACG	I	A	Red	NA	NA	NA	NA	NA	NA	chr13:100620241-100624348	Island	CAGCGGGGATTCGCCCCCGTGCTTGCGGCCGCCTGCGCTTTCGCTTCGCGCCCCCTCCTC[CG]CTGGAGCCACACGTCCCCGCCTCCCCGGGGATGCCCAAGTTGCACTTGCAGAAAGTTTGA	CAAGTGCAACTTGGGCATCCCCGGGGAGGCGGGGACGTGTGGCTCCAGCG			ZIC5	NM_033132	TSS200				13:99420289-99422349				0.154697	0.13386	0.020837	825	389	1214
cg17789479	-0.24021	-4.06998	-3.43523	0.00094224	0.999978	-1.24746	chr17	39845073	-	24750398	23767366	CAACACCACCTAAACACTTAAAACACAACACTATAAATAAAATCAAAACA	CGACGCCGCCTAAACGCTTAAAACACGACGCTATAAATAAAATCAAAACG	I	T	Red	NA	NA	NA	NA	NA	NA	chr17:39844833-39845950	Island	ACCAATTGGAAGCGGCGCCGCCTGGGCGCTTGGGGCACGACGCTGTGGGTGGGGTCAGGA[CG]TGAGGGCAGCGCGCTGGCGTCAGAGGCGCGGCTATATAACTAAACACAGGCACCGCCCCT	CGTCCTGACCCCACCCACAGCGTCGTGCCCCAAGCGCCCAGGCGGCGCCG			EIF1	NM_005801	TSS200				17:37098303-37099535	17:39844212-39846513	Promoter_Associated		0.0542884	0.0624338	0.0081454	334	887	1221
cg12664464	0.215645	-3.25336	3.27081	0.00158485	0.999978	-1.59315	chr20	61051021	-	54719381	38695328	CTAAAACACTCACCAACAAACAAAAAAAACAACAAAACACAACAATAACA	CTAAAACACTCACCAACGAACAAAAAAAACGACAAAACACGACGATAACG	I	A	Red	NA	NA	NA	NA	NA	NA	chr20:61049361-61051897	Island	CTGCAGCCCGGGCTGGAGCACTCACCAGCGGGCAGGGAGGGCGGCAGGGCACGGCGGTGG[CG]GTGGGTCGGCGACCGGCGGGCCGAAGACTGGAAGCCCGGGCCGCTGAGGCTCCGCAGCCC	CGCCACCGCCGTGCCCTGCCGCCCTCCCTGCCCGCTGGTGAGTGCTCCAG			GATA5;GATA5	NM_080473;NM_080473	1stExon;5'UTR				20:60483279-60485311			TRUE	0.101008	0.0881174	0.0128908	544	677	1221
cg04804472	-0.261755	3.21465	-3.19256	0.00201833	0.999978	-1.75353	chr3	21267468	+	59622320		AAAAAAAATAAAACTAATAATTAATTTTCCCCTAAAATACRACCATTTCC		II			rs4858300	0.122566	NA	NA	NA	NA		OpenSea	AGAGAAGTGGCCTGACTTCAGAGGGACAGCTTGAGGTATAATTTCGGAGAAGAATCTGGC[CG]GAAATGGCCGTACTTCAGGGGAAAATTAACTATCAGCCTCATCCTCTTTTCAGCTCCCCT	AAGAGGATGAGGCTGATAGTTAATTTTCCCCTGAAGTACGGCCATTTCCG									3:21242383-21242483				0.894432	0.911108	0.0166766	710	512	1222
cg16239406	0.157491	-3.93947	3.52482	0.000705081	0.999978	-1.05435	chr6	36954249	+	73752385		TAACTTAAAAACRCCTCAAACCATATTAAAAACRTCTAACAACCAAAAAC		II			NA	NA	NA	NA	NA	NA	chr6:36953667-36954470	Island	GGCAGCCGCAGGCCGGGGCGCTCCCCCGGGATGCCCAGAGCACGCGGGGGCGGGGTTCGG[CG]CCTCTGGCTGCCAGACGTCCCCAATATGGTCTGAGGCGCTTCCAAGCCACCTCCCTGGCT	GGCTTGGAAGCGCCTCAGACCATATTGGGGACGTCTGGCAGCCAGAGGCG		TRUE	MTCH1	NM_014341	TSS1500	high-CpG:37061625-37062277			6:37061275-37062567	6:36953470-36955113	Promoter_Associated		0.0638089	0.0578258	0.00598313	250	974	1224
cg15270970	0.18161	2.80913	3.25055	0.00168787	0.999978	-1.63495	chr7	30791913	-	44639306	61663380	CAAAACCAAAATACTAAAATTTAACTTAAAATATCTCCACAAAACCTTCA	CGAAACCGAAATACTAAAATTTAACTTAAAATATCTCCACAAAACCTTCG	I	A	Red	NA	NA	NA	NA	NA	NA		OpenSea	CAGCCCCTCACCCGAGGCCGAGATGCTGAAGTTTAACTTGGAATGTCTCCACAAGACCTT[CG]GCCCTGGTGAGCAGAGGGTGGCCCTTCCCCTTGAGCCTCTCTCCAAGGAACCTGGATGGG	CGAGGCCGAGATGCTGAAGTTTAACTTGGAATGTCTCCACAAGACCTTCG			INMT	NM_006774	1stExon			TRUE					0.878885	0.865464	0.0134212	580	644	1224
cg04131583	0.364799	-3.75853	3.19429	0.00200769	0.999978	-1.75003	chr16	86529961	+	38706325	23771505	CCACATAACTACATCTCCACAAACAAAATAAAACAAAAACTCAACAAACA	CCGCATAACTACGTCTCCACAAACAAAATAAAACGAAAACTCGACGAACG	I	T	Red	NA	NA	NA	NA	NA	NA	chr16:86530747-86532994	N_Shore	CCAGTCAAAGTTCCTCTAGGAAAAGATTAGACACGGCTCCGAAAGTTCCACTGGGCTAGA[CG]CCCGCCGAGTCTCCGTTTCACCTTGTCTGTGGAGACGCAGCTATGCGGTGTCTGATAAGT	CGCCCGCCGAGTCTCCGTTTCACCTTGTCTGTGGAGACGCAGCTATGCGG							CDMR		16:85087075-85087787				0.0782595	0.0619238	0.0163357	704	520	1224
cg23008646	-0.29638	-2.84705	-3.12542	0.00247626	0.999978	-1.88896	chr14	61113963	-	11692467	30761451	CTCTAATTTCATCTAAAATCAACCCTCAAACCTAACTTATAAAACAACCA	CTCTAATTTCATCTAAAATCGACCCTCGAACCTAACTTATAAAACGACCG	I	T	Red	NA	NA	NA	NA	NA	NA	chr14:61114102-61116552	N_Shore	AGCGCAGCCAGTCTCTGATTTCATCTGGAGTCGGCCCTCGGGCCTGGCTTATAGGACGGC[CG]TTTTGTAACTAAAGGCTAACTGCAACCATACAATCCCTGTTCCTGTGTTACTTGCTAACT	CGGCCGTCCTATAAGCCAGGCCCGAGGGCCGACTCCAGATGAAATCAGAG			SIX1	NM_005982	Body		CDMR	TRUE					0.117427	0.139381	0.0219541	863	364	1227
cg21907496	0.219707	3.90872	3.41505	0.0010052	0.999978	-1.29051	chr1	15052930	-	22725463	62657318	AAAACATCCCCTAAAAAACACATTCCCAACATCTCAACAAATATAAAACA	AAAACGTCCCCTAAAAAACGCGTTCCCAACATCTCAACAAATATAAAACG	I	A	Red	rs10927520	0.271272	NA	NA	NA	NA		OpenSea	CCCCACCAGAAGGAAGCGTCCCCTGGGAGACGCGTTCCCAGCATCTCAGCAGGTGTGGAG[CG]GCTTCCGGGTGTGTGCTCTCCCCCAGGGATCCAGGTGGGTCATCCATGCTTCCCTCAGTC	GAAGCGTCCCCTGGGAGACGCGTTCCCAGCATCTCAGCAGGTGTGGAGCG			KIAA1026;KIAA1026	NM_201628;NM_015209	Body;Body			TRUE					0.939694	0.931217	0.00847661	354	874	1228
cg01200389	0.238834	3.34469	3.22416	0.00183139	0.999978	-1.68909	chr18	76123613	-	26761388		AATATAAAAACAATTAAAACTTATCCRTAATCCACAAAAATAATTACTAC		II			NA	NA	NA	NA	NA	NA	chr18:76123612-76123926	Island	GAAACCAAACAAATGTAAGAGCAATTGGGGCTTATCCGTGATCCACAGAAATGATTGCTA[CG]TTCCCTGCAGAACGGACGGCAGTCGCTGGACAGGGCCCCAGAGCGCCTGGGTGCGGTCAG	ATGTAAGAGCAATTGGGGCTTATCCGTGATCCACAGAAATGATTGCTACG									18:74224577-74225000				0.913875	0.899414	0.0144606	632	598	1230
cg08743313	-0.212233	-2.37235	-3.12724	0.00246264	0.999978	-1.88531	chr4	188843522	+	12711510		CCATTCTAAATTAATACCCTACCTAAAAACACRAACAAACTACTACAAAC		II			NA	NA	NA	NA	NA	NA		OpenSea	CAAAAAGCCTATTGATTATTACAGCTTGTACTGACAACATTGTATATACATAGCTGGCAT[CG]TTTGTAGCAGTTTGCTCGTGTCCTCAGGCAGGGTACTAACCCAGAATGGGCACCCAGCCA	CATTCTGGGTTAGTACCCTGCCTGAGGACACGAGCAAACTGCTACAAACG								TRUE					0.156028	0.177456	0.0214285	855	375	1230
cg25284075	-0.268749	-3.43575	-3.24629	0.00171028	0.999978	-1.6437	chr1	214776764	-	70740462	54761428	AACAAACAACATAAAAATACCACTAACTTTTTACCAACAAATACTAAACA	GACGAACGACGTAAAAATACCGCTAACTTTTTACCGACGAATACTAAACG	I	A	Red	NA	NA	NA	NA	NA	NA	chr1:214776256-214776935	Island	CGGGCGGTAGGCGGCGGGCGGCGTGGGGGTGCCGCTGGCTTTTTGCCGGCGGGTACTGGG[CG]GGGAGGCCTCTGGGATCACTCTCCCGGCCCTGTAGGTGCCGGGGACCGCCCCCTCCCACC	GGCGGGCGGCGTGGGGGTGCCGCTGGCTTTTTGCCGGCGGGTACTGGGCG			CENPF	NM_016343	5'UTR				1:212842880-212843642	1:214775766-214777248	Promoter_Associated		0.0817604	0.0953281	0.0135677	596	637	1233
cg04245097	-0.205618	3.33305	-3.30074	0.00144346	0.999978	-1.53109	chr12	5600445	+	23720330		TACAAACTTCCTATAAACTCCATTTTAATAATCRACTTCTAACTTTTCTC		II			rs4074967	0.000208	NA	NA	NA	NA	chr12:5603587-5603990	N_Shelf	AGCTGCAAACCTCTGTGTTTTGGGGAGTTCTGTTAGCAACATTCTTGGACTTGCTCTCTA[CG]AGAAAAGCTAGAAGTCGATTATTAAAATGGAGTCCACAGGAAGCCTGCAGGGCTTTAAGA	CGAGAAAAGCTAGAAGTCGATTATTAAAATGGAGTCCACAGGAAGCCTGC			NTF3	NM_001102654	Body								0.904344	0.915868	0.0115237	496	738	1234
cg23557746	-0.177514	3.46001	-3.39934	0.00105694	0.999978	-1.3239	chr10	104060662	+	11723364		TTATATATTTTAAACCACTATCCTAACAAACTACTCTTAACATAATTAAC		II			NA	NA	NA	NA	NA	NA		OpenSea	GAGGAGACAATGCCAAATTGACTAGCCTATTGTTTTATTTTGGTTTTGTGTTTTAGTTCT[CG]TTAATTATGCTAAGAGTAGTTTGTTAGGACAGTGGTTTAAAATATATAAGAGAATCAGTA	TATATATTTTAAACCACTGTCCTAACAAACTACTCTTAGCATAATTAACG			GBF1	NM_004193	Body		RDMR						0.912744	0.921465	0.00872084	371	866	1237
cg19530831	0.205319	3.66792	3.35954	0.00119947	0.999978	-1.40804	chr14	76461805	+	38612333		CAACATTTCTCAAATTCCTACRAAAAAATCTAACTAACTTTCAATTCTAC		II			rs10135003	0.096066	NA	NA	NA	NA		OpenSea	GTGTTGGAGTCACAGCTGTTCCCTTTCTCTCCCCCTATTCCCTTGGTGTTCCTCCGAGGA[CG]CAGAACTGAAAGTTAGCCAGATTCCCTCGCAGGAATCTGAGAAATGCTGCTGGGCTCATG	CGCAGAACTGAAAGTTAGCCAGATTCCCTCGCAGGAATCTGAGAAATGCT			C14orf179;C14orf179	NM_001102564;NM_052873	Body;Body			TRUE					0.929636	0.919876	0.00975919	417	821	1238
cg09194449	-0.183204	-3.17341	-3.29484	0.00147036	0.999978	-1.54336	chr7	157482914	+	62656447		CRCCTAAAATCATCCCCAAATAAATCTAAAATAAACCTATAAAAAAAAAC		II			NA	NA	NA	NA	NA	NA	chr7:157476886-157486719	Island	TGGGCCAGGACAGCTGCCAACCCTCCAAATCTGTGCGCTCAGAAGGAGCTGCCCTTTGCC[CG]CTCCTCCTCACAGGCCCACCCTAGACCCACTTGGGGATGATCCCAGGCGCAGCTCTCCCC	GCCTGGGATCATCCCCAAGTGGGTCTAGGGTGGGCCTGTGAGGAGGAGCG			PTPRN2;PTPRN2;PTPRN2	NM_002847;NM_130842;NM_130843	Body;Body;Body		DMR		7:157174012-157179480				0.0965332	0.108251	0.0117173	509	730	1239
cg01719157	-0.277059	-3.78925	-3.25462	0.00166665	0.999978	-1.62655	chr11	4629606	-	60659480		AAACAAAAACCAAAATACCCCTAACCAATTAATAATAAAACRAAAATTTC		II			NA	NA	NA	NA	NA	NA	chr11:4629098-4629530	S_Shore	CAGCCAATCACAGGCAGGGACCAGGGTACCCCTAGCCAATTGGTGATGAGACGGGGGTTT[CG]GCGCTTCTAGGCATGTCAATGTTTTTTCTCTACTTCCTGGGTTTTTCTGGTCCCTTCACC	GGCAGGGACCAGGGTACCCCTAGCCAATTGGTGATGAGACGGGGGTTTCG			TRIM68	NM_018073	TSS200					11:4628812-4630013	Promoter_Associated		0.0646779	0.0776768	0.0129989	569	670	1239
cg00830401	-0.147538	0.150857	-3.09886	0.00268279	0.999978	-1.94196	chr7	151553558	+	26694359	11689376	TTAAACCCAATATAACTATCTCCAAAATCCACACCCTTCCCTACAAAACA	TTAAACCCGATATAACTATCTCCAAAATCCACGCCCTTCCCTACAAAACG	I	T	Red	NA	NA	NA	NA	NA	NA		OpenSea	CTGGAAGGTATTTTGCCTTCTTCATTGCCCCAAATTAGGATGTAGGGGGAGACGAAAAGA[CG]TCCTGCAGGGAAGGGCGTGGATTTTGGAGACAGCCACACCGGGTTCAATTGGCCTCGCCG	CGTCCTGCAGGGAAGGGCGTGGATTTTGGAGACAGCCACACCGGGTTCAA			PRKAG2	NM_016203	Body				7:151184350-151184612				0.517299	0.541297	0.0239981	935	304	1239
cg01117274	0.148519	0.2992	3.07786	0.00285732	0.999978	-1.98363	chr8	15094114	+	24632368		AAATAAAAACTTTAAAAAACCAACAAACCACAAAATACTTTAAATATCCC		II			rs79939347	0.039096	NA	NA	NA	NA	chr8:15094237-15095168	N_Shore	TTTCAATAAAAGAGGTGCTTCCAGTGTCGCCCCCTTTCCCGCTTTTTCGTTTACGGTGAG[CG]GGACATTTAAAGTATTTTGTGGTTTGTTGGTTTTTTAAAGTTTTTATTTATTGTGTGTAT	CGGGACATTTAAAGTATTTTGTGGTTTGTTGGTTTTTTAAAGTTTTTATT			SGCZ	NM_139167	Body								0.56116	0.534291	0.0268693	1000	239	1239
cg26850559	-0.271075	-3.9724	-3.3326	0.00130598	0.999978	-1.46459	chr10	3214952	+	71624387	28731342	AAAAAATTCCTCACCAACCAAATACTCATCATACACAATATAACACTACA	AAAAAATTCCTCGCCAACCAAATACTCGTCATACGCAATATAACGCTACG	I	A	Red	NA	NA	NA	NA	NA	NA	chr10:3214721-3215260	Island	CCGTCGCAGCGTCTCACCCGCCGCTCAGCCGCCTCAGCACACACAGGCCCTGCCGCCCGC[CG]CAGCGCCACATTGCGCATGACGAGCACCTGGCTGGCGAGGAACCCCCTCTTAACCCGACG	AGGGGGTTCCTCGCCAGCCAGGTGCTCGTCATGCGCAATGTGGCGCTGCG			PITRM1	NM_014889	1stExon	high-CpG:3204926-3205010			10:3204503-3205309	10:3214170-3215989	Promoter_Associated		0.0576804	0.0680103	0.0103299	446	794	1240
cg14718495	-0.218625	3.47835	-3.28133	0.00153375	0.999978	-1.57139	chr3	19268469	-	69736438		TCTCTAACTTATCCACTAAACCTCAAAACTTAAAATCTATTTTTAAAACC		II			rs80028420	0.09465	NA	NA	NA	NA		OpenSea	CCAGTCTCTTATCTCTGACTTGTCCACTAGACCTCAAGACTTAGGGTCTATTTTTGGAGC[CG]TGTCCCAAGTCTTCACCTGGATTCTTCACTGGACTCCTTTTGCCTGGATAGGTCCAGTGA	CGGCTCCAAAAATAGACCCTAAGTCTTGAGGTCTAGTGGACAAGTCAGAG			KCNH8	NM_144633	Body			TRUE					0.911964	0.923927	0.0119624	527	717	1244
cg05765482	-0.275294	-3.56944	-3.25182	0.00168118	0.999978	-1.63231	chr17	52978194	+	13728378	63661315	CTCTTACCAAACACCATAATAACACCAAAAAACCAAACCCAAAAAATCCA	CTCTTACCAAACGCCATAATAACGCCAAAAAACCGAACCCAAAAAATCCG	I	C	Grn	NA	NA	NA	NA	NA	NA	chr17:52977866-52978307	Island	CGAAGAGGAGGAGCCAAGGGTACCGAGCGGGTGGAGTCGGGAGCCGGAGAGCGGTGGAGG[CG]GATTTCCTGGGCCCGGCCCTCTGGCGCTACCATGGCGTTTGGCAAGAGTCACCGGGATCC	CTCTTGCCAAACGCCATGGTAGCGCCAGAGGGCCGGGCCCAGGAAATCCG			TOM1L1;TOM1L1	NM_005486;NM_005486	1stExon;5'UTR	high-CpG:50333021-50333289			17:50332768-50333519				0.0749568	0.0879844	0.0130276	579	666	1245
cg08041014	-0.168531	1.08255	-3.10153	0.00266137	0.999978	-1.93665	chr17	41175726	-	73769500		ATAAAAACATAAAAACCAAACCTTTAAAACTTTCTAACTTTAATATTAAC		II			NA	NA	NA	NA	NA	NA	chr17:41176670-41176966	N_Shore	GCAGTGGCAAAGTAGAAGCATGGAGACCAAGCCTTTAAAACTTTCTGACTTTGGTGTTAA[CG]TTCTGTTCCTCATTTTCCCTTCTGTAACATAGTGATGATGCTGCGTGCTCTAGTTATATT	TAGAAGCATGGAGACCAAGCCTTTAAAACTTTCTGACTTTGGTGTTAACG			VAT1	NM_006373	TSS1500								0.669715	0.693178	0.023463	928	317	1245
cg09486879	-0.256432	3.34495	-3.19975	0.00197433	0.999978	-1.73892	chr17	76497940	-	23636390		TTCATCCTATCRCCAACRTTAAAATTCCCCATAAACAACRTAATAAATAC		II			rs61743998	0.015608	NA	NA	NA	NA	chr17:76498807-76499075	N_Shore	TGGTCATGATCTTCATCCTGTCGCCAGCGTTGAGGTTCCCCATGAGCAGCGTGATGAGTA[CG]TTCAGCTGGCTAATCTGCGGGGGAGAGTGCCTTCGATGAGACACCACGGGTGCCCACATG	TCATCCTGTCGCCAGCGTTGAGGTTCCCCATGAGCAGCGTGATGAGTACG			DNAH17	NM_173628	Body				17:74009445-74009584				0.902601	0.918265	0.0156636	689	557	1246
cg13768347	-0.281193	3.85719	-3.28628	0.00151023	0.999978	-1.56112	chr11	1311540	-	55775465		CCTAAAAACACCRTACAATAAATAACCTTATTCCAACRAAAATTCTTAAC		II			NA	NA	NA	NA	NA	NA	chr11:1311351-1311619	Island	AAGAGTCCACGCCTGGGGGCACCGTGCAGTGGATGACCTTATTCCAGCGGGGATTCTTGG[CG]CCATTGTGTGCCGTGGGCGTCTCGTACACCGCGTAGCCCAGGCGCAGTCGGCAGTAGGGG	CGCCAAGAATCCCCGCTGGAATAAGGTCATCCACTGCACGGTGCCCCCAG			TOLLIP	NM_019009	Body				11:1267315-1268895	11:1311277-1311575	Unclassified_Cell_type_specific		0.929349	0.940981	0.0116329	516	734	1250
cg22621272	0.179359	-1.31924	3.0847	0.00279935	0.999978	-1.97008	chr12	54409336	+	61622478		CATACCTTCCCCAAACTTCCTCCATAATAAAAAAAACAATTCCCTAAACC		II			NA	NA	NA	NA	NA	NA	chr12:54408426-54408713	S_Shore	TTAACTACCTGTTATAAAATTTATGGGTGGGTTTGTGAAAAGAAACGAGGTCCCTGCATC[CG]GCCTAGGGAACTGCTTTTCTTACTATGGAGGAAGTCTGGGGAAGGCATGAGGTATCCCCT	CGGCCTAGGGAACTGCTTTTCTTACTATGGAGGAAGTCTGGGGAAGGCAT			HOXC4;HOXC6;HOXC5	NM_014620;NM_153693;NR_003084	TSS1500;TSS1500;TSS1500								0.296573	0.271266	0.0253073	981	271	1252
cg05449136	-0.210087	-3.79979	-3.34313	0.00126333	0.999978	-1.44252	chr5	138729245	-	70702339		CATAAAATCCCATATCTCTTAAAAAAATAAACCCCAAATTCCAATAAAAC		II			NA	NA	NA	NA	NA	NA	chr5:138727710-138730911	Island	GAGCCCGGCCCCATGGGATCCCATGTCTCTTGGGGAGATGGGCCCCAAGTTCCAATAGGA[CG]ATCTGGAGCCTCCCACGGGAAGAAGGCCGGCGGGGACGGGCTGCTACGTGGCTCCACCGC	CGTCCTATTGGAACTTGGGGCCCATCTCCCCAAGAGACATGGGATCCCAT			LOC389333	NM_001161546	1stExon		DMR		5:138755676-138758786	5:138728175-138730171	Unclassified		0.0644249	0.074288	0.00986315	436	817	1253
ch.20.531991F	-0.242201	-2.68846	-3.14081	0.00236346	0.999978	-1.8581	chr20	24944973	+	49603469		TAATTATAATCTAATAAATAAAAATCATTCTAAACCTTAACTACAATACT		II			NA	NA	NA	NA	NA	NA		OpenSea	AAGCACATCTCTGGATGGCCTGGCTGAACTGAGAGAGACATATCACATCCGACGTGGTCA[CA]GCACTGCAGCCAAGGCTCAGAATGACCTCCACTCACCAGATCACAACCAGCGCAGCTTCC	CAGCACTGCAGCCAAGGCTCAGAATGACCTCCACTCACCAGATCACAACC			C20orf3	NM_020531	Body								0.1295	0.149107	0.0196066	828	425	1253
cg09990086	0.159006	-0.024134	3.0792	0.0028459	0.999978	-1.98098	chr8	38643846	-	69736327		AAAATAAAAAACATCAACTATTTCCCATTACCTTCAAACCTAAAAATATC		II			NA	NA	NA	NA	NA	NA	chr8:38644473-38645760	N_Shore	TCCCTCCATGGGAAATGGAGAACATCAGCTATTTCCCATTGCCTTCAAACCTAAAGATGT[CG]CCAGGCCTCTTGGCTTGTTACTGAAGCAGCGAAATAAGTCAGAAATCAAAGACTTAGAAG	AAATGGAGAACATCAGCTATTTCCCATTGCCTTCAAACCTAAAGATGTCG		TRUE	TACC1;TACC1;TACC1	NM_001122824;NM_006283;NM_001146216	TSS1500;TSS1500;5'UTR								0.505162	0.479494	0.0256681	992	264	1256
cg03625010	-0.157722	-3.97635	-3.4794	0.000817204	0.999978	-1.15266	chr12	24715484	+	44673352		CATAACCAACAAAAAAATTTCACCTCRTCCTTAAAAACAACACRAAAAAC		II			NA	NA	NA	NA	NA	NA	chr12:24714956-24716243	Island	GTGTGTGTGCGCGCGCGTGTCCCTCTCTCTCCCCCCGTCTCTCGCTCGCCCGCTCGCTCG[CG]CTCCCCGTGTTGCTCTCAAGGACGAGGTGAAATCCCTTTGCTGGTCATGAGGCGGCTTCA	ATGACCAGCAAAGGGATTTCACCTCGTCCTTGAGAGCAACACGGGGAGCG			SOX5	NM_152989	TSS200	high-CpG:24606601-24606867	DMR		12:24605919-24607100	12:24714577-24715591	Unclassified	TRUE	0.05793	0.0641362	0.00620623	293	964	1257
cg15715881	0.298861	-4.84573	3.46614	0.000853007	0.999978	-1.18122	chr1	145209236	-	45616402	28644462	CTCAAAACACAAAAAATCAAAACATTTACACTAAACTTCAAAACATAACA	CTCGAAACGCGAAAAATCGAAACATTTACGCTAAACTTCGAAACGTAACG	I	C	Grn	NA	NA	NA	NA	NA	NA	chr1:145208944-145210075	Island	AGGAGCGGCGGACTCGGGGCGCGGGGAGTCGAGGCATTTGCGCTGGGCTTCGGAGCGTAG[CG]CCAGGGCCTGAGCCTTTGAAGCAGGAGGAGGGGAGGAGAGAGTGGGGCTCCTCTATCGGG	CTCGGGGCGCGGGGAGTCGAGGCATTTGCGCTGGGCTTCGGAGCGTAGCG			NOTCH2NL;NOTCH2NL	NM_203458;NM_203458	5'UTR;1stExon	high-CpG:143920254-143920770			1:143920239-143921432	1:145208752-145210081	Promoter_Associated		0.0370425	0.0306383	0.00640412	303	955	1258
cg07931785	-0.208675	2.52359	-3.17566	0.00212553	0.999978	-1.78783	chr12	8026515	+	11670385		ACCCTTATTTACTATTAACTTATCAACCCTATACTAAAAACCATACTATC		II			NA	NA	NA	NA	NA	NA	chr12:8025364-8025908	S_Shore	AGATTGTTCTCCCCTAGCCCAAGCATAAGGCTTACCTTGGAATTACCTGGAGCCTTACCA[CG]ACAGCATGGCCTTCAGTACAGGGTTGACAAGTCAATAGCAAACAAGGGCCATTAAAAGGG	CCCTTGTTTGCTATTGACTTGTCAACCCTGTACTGAAGGCCATGCTGTCG			SLC2A14	NM_153449	TSS1500								0.844096	0.860654	0.0165582	749	514	1263
cg04989395	-0.329766	2.93534	-3.11272	0.00257313	0.999978	-1.91435	chr3	170167033	+	32742312		TAAAACATATTTTATTTTCTTCTCACRCATCCCRTAAAACTTTTATTTCC		II			NA	NA	NA	NA	NA	NA		OpenSea	GATATGGGTACAGCAATAAGTGCATTAGCTTCACGTGCATCCGCCTTCTAACCTGTTAAG[CG]GAAACAAAAGTTCCACGGGATGCGTGAGAAGAAAACAAAACATGTTTCAATCTCATTTTC	CGGAAACAAAAGTTCCACGGGATGCGTGAGAAGAAAACAAAACATGTTTC								TRUE					0.872442	0.894079	0.0216368	893	371	1264
cg14712575	0.175527	1.17568	3.08989	0.00275611	0.999978	-1.95979	chr1	3248373	-	66722377		CRTAACTCTACTATAAATTAAACAACCCCTTATTAATAAACTCCCCRCTC		II			NA	NA	NA	NA	NA	NA		OpenSea	CCTGGGCTCACCGTGGCTCTGCTGTGGGTTAAGCAACCCCTTGTTAGTAGGCTCCCCGCT[CG]GGTGGAATGGCTGTGAGCTGTGGCCCGGCCCCGTCTGTGGCCAGATCTGCACACAGCCCC	GTGGCTCTGCTGTGGGTTAAGCAACCCCTTGTTAGTAGGCTCCCCGCTCG			PRDM16;PRDM16	NM_022114;NM_199454	Body;Body					1:3248341-3248391	Unclassified_Cell_type_specific		0.700802	0.676583	0.0242194	967	298	1265
cg12441919	0.170086	2.72275	3.21117	0.00190622	0.999978	-1.71565	chr1	44483099	+	52727453	11632407	ACTCAAACAACATCTAATCAACTCCATAAAAAAAATAAACCACCCTCTCA	ACTCAAACAACGTCTAATCAACTCCGTAAAAAAAATAAACCACCCTCTCG	I	C	Grn	NA	NA	NA	NA	NA	NA		OpenSea	CAACACACACACACACACACACACACACACACACACACACACAGACTGGGGCAGAGCAGG[CG]AGAGGGTGGCTCACTCCCCCCACGGAGCTGACCAGACGCTGTCTGAGCCCACAGGCCTAG	GCTCAGACAGCGTCTGGTCAGCTCCGTGGGGGGAGTGAGCCACCCTCTCG			SLC6A9;SLC6A9;SLC6A9	NM_001024845;NM_201649;NM_006934	Body;TSS200;TSS200			TRUE					0.872522	0.858341	0.0141817	657	610	1267
cg14422899	0.15778	1.93183	3.16038	0.00222693	0.999978	-1.8187	chr14	95538385	-	64808372		ATAATCAATTAATATCTTCCTCTACTAAAAACRAAACCCCRAAAAACCCC		II			NA	NA	NA	NA	NA	NA		OpenSea	AGGAGCCATCCATAATCAATTGATATCTTCCTCTGCTGGAGGCGGGGCCCCGGGGAGCCC[CG]CTCCCCATCCTCATCCGCAGGGGCCTCCACCCCTGGATCCAATTAGACCGCGGCTCAGCG	CGGGGCTCCCCGGGGCCCCGCCTCCAGCAGAGGAAGATATCAATTGATTA									14:94607998-94608234				0.797562	0.780311	0.017251	775	492	1267
cg09874213	-0.206187	-3.08291	-3.21291	0.00189604	0.999978	-1.7121	chr1	24968352	+	11729448		TTTTTTCCATAACACTTAACCCACCTAAAAATATATATATATTTACTCTC		II			NA	NA	NA	NA	NA	NA	chr1:24969027-24970196	N_Shore	AGAGAAGTCTGAGCTGGAGATGCAGGGATGTCTCCAGCACACAGCTAGTGTCTCCAGCCA[CG]AGAGCAAACACACACATACTTTCAGGTGGGCTAAGTGCCATGGAAAAAAAGAGAAAAGGG	TTTTTCCATGGCACTTAGCCCACCTGAAAGTATGTGTGTGTTTGCTCTCG			SRRM1	NM_005839	TSS1500				1:24840737-24841121	1:24968041-24968568	Promoter_Associated_Cell_type_specific		0.101867	0.115896	0.0140288	653	615	1268
cg15327300	0.166363	-2.26556	3.17677	0.00211833	0.999978	-1.78558	chr17	65373795	-	47601405	57719457	TCAACATCTCCAACTCCAACTACAATATATTCCTAATAACATTAACATCA	TCAACATCTCCGACTCCGACTACAATATATTCCTAATAACATTAACATCG	I	A	Red	NA	NA	NA	NA	NA	NA	chr17:65373224-65375131	Island	TTGTCTGGAAAGTCAGCATCTCCGGCTCCGGCTGCAATGTGTTCCTGGTGACATTAGCAT[CG]GGCAGACCCGCCGGAGGAGGGGGGTCGCCAGGTTCCCGTCTGCTTTCGGAGGCGGATCGA	TCAGCATCTCCGGCTCCGGCTGCAATGTGTTCCTGGTGACATTAGCATCG			PITPNC1;PITPNC1	NM_181671;NM_012417	TSS200;TSS200				17:62803687-62804321				0.179175	0.163021	0.016154	745	528	1273
cg06073141	-0.198039	3.12196	-3.3017	0.0014391	0.999978	-1.52908	chr3	190105762	+	23791422		CCCAACTATAAACTAATAATAATCACCAAACCAAATACCAATACCAAAAC		II			NA	NA	NA	NA	NA	NA		OpenSea	GGGCCTAAGAAAGATCAGTTTACAGGTTCCAGCATGGGGTGGGACCCTTCCTCCTTCCCC[CG]TCTTGGCACTGGCACTTGGTCTGGTGACCACCACTAGCCCACAGTTGGGTCAGAAAACGT	CCAACTGTGGGCTAGTGGTGGTCACCAGACCAAGTGCCAGTGCCAAGACG			CLDN16	NM_006580	TSS200								0.891858	0.902533	0.0106742	494	780	1274
cg15778012	0.386785	-4.41868	3.27639	0.00155756	0.999978	-1.58161	chr11	43601125	-	35800357	21789458	AAAAATCAACACCCAAATCAACTAATAATCAATCAACTCACTAATAATCA	AAAAATCGACGCCCGAATCGACTAATAATCGATCGACTCACTAATAATCG	I	A	Red	rs141461882	0.0119	NA	NA	NA	NA	chr11:43600712-43601409	Island	AGGTAAGGAGCAGGGAGTCGGCGCCCGGGTCGGCTGGTGGTCGGTCGGCTCACTGGTAGT[CG]GTCGGCTCACGGGTAGTCTGAGCAGAACTTTTTTTTCCCAGTTGCCCCGCGCCGCGGCGG	GGGAGTCGGCGCCCGGGTCGGCTGGTGGTCGGTCGGCTCACTGGTAGTCG							DMR		11:43557071-43558030				0.0513152	0.0398557	0.0114595	534	742	1276
cg02816429	0.157626	1.81106	3.12724	0.00246265	0.999978	-1.88531	chr7	44229209	+	36632406		AAACAAATAACAAAAACTTAACAAACTAACRATCACTATAATAACAAAAC		II			rs12702070	0.054572	NA	NA	NA	NA		OpenSea	CATAAAACTGGGACTGGTGGCAAAGAGCCTCCATCCCCATCACCATGGTGACCACTCAAT[CG]CCTTGTCACTACAGTGACCGCTAGCCTGTTAAGCCTTTGCCACCTGTTCAGATCCTGGGG	CGCCTTGTCACTACAGTGACCGCTAGCCTGTTAAGCCTTTGCCACCTGTT			GCK	NM_000162	TSS200								0.784307	0.764539	0.0197678	856	420	1276
cg19222480	-0.153523	-3.77007	-3.45006	0.000898395	0.999978	-1.21573	chr20	44441446	+	74668359		ACTCTAAATACCAATACCTAAAACATAACAAACCCRACRAATAATAAACC		II			rs440789	0.020999	NA	NA	NA	NA	chr20:44440946-44441655	Island	AAAGGAGCTGAGCCGAGCGGGGGCGCCGCCCGGGGTCCGGTGGGCAAAAGGTGAGTGATG[CG]GCCTACCACTCGCCGGGCCTGCCATGCCCTAGGCATTGGTACCCAGAGCAAAGATTTCTA	CGGCCTACCACTCGCCGGGCCTGCCATGCCCTAGGCATTGGTACCCAGAG		TRUE	UBE2C;UBE2C;UBE2C;UBE2C;UBE2C;UBE2C;UBE2C	NM_181801;NM_181802;NM_181802;NM_007019;NM_181800;NM_181803;NM_181799	TSS1500;1stExon;5'UTR;Body;Body;Body;Body				20:43874354-43875112	20:44440746-44442099	Promoter_Associated		0.066458	0.0728659	0.00640794	323	954	1277
cg14343457	0.221678	3.4192	3.26304	0.00162363	0.999978	-1.60919	chr6	149716235	-	56687385		TATTTAAAATCTTTCTCTTACCCTACTCCCTAACCCCAATCTCTACTACC		II			NA	NA	NA	NA	NA	NA		OpenSea	TGTTTACCCTTTGTTTAGAGTCTTTCTCTTGCCCTACTCCCTGGCCCCAATCTCTGCTAC[CG]TGGTAACGTGAGCTCCGCAAGGGCAAGGATTTTTTCCTATTTTGTTCATGGACTTCCAAA	CGGTAGCAGAGATTGGGGCCAGGGAGTAGGGCAAGAGAAAGACTCTAAAC			MAP3K7IP2	NM_015093	Body			TRUE					0.917453	0.905571	0.0118821	555	722	1277
cg02865832	0.243817	3.11038	3.20753	0.00192764	0.999978	-1.72306	chr17	77083140	-	23752454		ACTAAATATAAAATCATCTCCRAAACRTTTTCAACAACCCCTAACTCTAC		II			NA	NA	NA	NA	NA	NA		OpenSea	TTTACTGTGCTGCTGAGTGTGAGGTCATCTCCGGAGCGTTTTCAGCAGCCCCTGGCTCTG[CG]GCGTCTCTTCCGGGCTGTGGGCATGCAGGGAAGTGGCTCTGAGGCAGTCTGCGCTGTGGC	CTGAGTGTGAGGTCATCTCCGGAGCGTTTTCAGCAGCCCCTGGCTCTGCG			ENGASE	NM_001042573	3'UTR				17:74594464-74594748				0.899405	0.885242	0.0141631	667	611	1278
cg27622506	-0.258889	-4.20712	-3.37161	0.00115442	0.999978	-1.38258	chr3	24537160	+	50741315	23682465	AACCAATCAAACCAAACAAAAAAAACCAAAACATACTCCTAAAAAACTCA	AACCGATCGAACCGAACAAAAAAAACCGAAACGTACTCCTAAAAAACTCG	I	C	Grn	NA	NA	NA	NA	NA	NA	chr3:24535844-24537436	Island	TCATTACTCTAGTTGGAGAAGAGGAAAGAATGGGGAACGAGTGACACCGGGACCGGAGGG[CG]AGTCTTCCAGGAGCACGTCTCGGCCTTCTTTGCCCGGCCCGACCGGCCCGACCCGTGCCG	GGCCGGTCGGGCCGGGCAAAGAAGGCCGAGACGTGCTCCTGGAAGACTCG			THRB;THRB;THRB	NM_001128177;NM_001128176;NM_000461	TSS1500;TSS1500;TSS1500				3:24510516-24512440			TRUE	0.0495507	0.0578724	0.00832167	404	879	1283
cg09235702	0.169039	2.41988	3.17103	0.00215577	0.999978	-1.79719	chr19	53771332	-	33604322		ATACRAACTTAAACCTACCTAATTTTATTACAAAAACAATACATTTAACC		II			NA	NA	NA	NA	NA	NA		OpenSea	TTACAGGCAAAATGCGAACTTGAACCTGCCTGGTTTTATTGCAAAGACAGTGCATTTAGC[CG]TTATAGTTGACTAACAAAGCTAGATAGCTGTGTTCTTTGAATAAGACACACACACACACA	CGGCTAAATGCACTGTCTTTGCAATAAAACCAGGCAGGTTCAAGTTCGCA			VN1R4	NM_173857	TSS1500								0.847231	0.831135	0.0160959	754	530	1284
cg01002208	0.271087	3.3908	3.17921	0.00210253	0.999978	-1.78062	chr2	134576855	+	21624310		ATTCCATTCAAATATTCTTATTCATAAAAATCTACTAAACAATTTTCTCC		II			NA	NA	NA	NA	NA	NA		OpenSea	ACCAGATAGGCAGCAAGAAGGCCCTCACAACATGGCAGCAGGTAGATAAGAAATTCCCCA[CG]GAGAAAACTGCTCAGTAGATTTCTATGAACAAGAACATCTGAATGGAATTGGAAGTGGTT	CGGAGAAAACTGCTCAGTAGATTTCTATGAACAAGAACATCTGAATGGAA								TRUE					0.916497	0.900592	0.0159055	740	546	1286
cg00716040	-0.200465	2.46577	-3.13512	0.00240457	0.999978	-1.86952	chr1	24862381	+	27654440		TACTTTATCCCAAATTCCAAATAAAAACAACATATAAATAAATCTATATC		II			NA	NA	NA	NA	NA	NA	chr1:24861702-24861920	S_Shore	AGTATTTGTTCAATTAGCTTTGGGGAAGAAATGCCAAATCCACTTTGAGGATGAGTCTTA[CG]ACACAGATCCACCCACATGTTGCTCTTATCTGGAATTTGGGACAAAGCAATGCACAGGCC	CGACACAGATCCACCCACATGTTGCTCTTATCTGGAATTTGGGACAAAGC			RCAN3	NM_013441	3'UTR			TRUE					0.838223	0.856886	0.0186635	836	450	1286
cg00781378	0.176502	2.85112	3.22513	0.00182591	0.999978	-1.6871	chr3	173999704	+	45628432		CRACTTAATCAACAACACAACCACCAAACATATAAATTATCATACACATC		II			NA	NA	NA	NA	NA	NA		OpenSea	ATCACATAAGTGCTGTCAGTATAAAGTTGTGGGGATAAAGGAAACTGGATATTTTTAGCA[CG]ATGTGCATGATAATTTATATGCTTGGTGGCTGTGCTGCTGATTAAGCCGTAATTAAAATT	GGCTTAATCAGCAGCACAGCCACCAAGCATATAAATTATCATGCACATCG			NLGN1	NM_014932	3'UTR								0.882007	0.868787	0.01322	631	656	1287
cg25190491	-0.247489	-3.97001	-3.32196	0.00135046	0.999978	-1.48685	chr1	2518505	-	59799336	29619342	AAATAATAAAAACCACAAAACCTAAACAAAACTAAAAACAACAAAACACA	AAATAATAAAAACCGCGAAACCTAAACGAAACTAAAAACAACGAAACGCG	I	C	Grn	NA	NA	NA	NA	NA	NA	chr1:2517397-2518892	Island	CTGGCAGCGATGGGGTGGTGGGGGCCGCGGGGCCTGGGCGGGGCTGGGGGCAACGGGGCG[CG]CCCATGACCCAGCCGCCCGGCAGGCCGTGGAGCTGCGGAGCCTGTGGCGGGAGCACGCGT	CGCGCCCCGTTGCCCCCAGCCCCGCCCAGGCCCCGCGGCCCCCACCACCC			C1orf93	NM_152371	Body	high-CpG:2507562-2508424			1:2507372-2508722				0.0577469	0.0674374	0.0096905	462	827	1289
cg20084652	-0.139253	1.46123	-3.10763	0.00261291	0.999978	-1.9245	chr11	908683	+	41741336		CCTAAATATACCCTCCAATTACTCCTAAACCAATCCCCTAAAAAACCACC		II			NA	NA	NA	NA	NA	NA	chr11:910242-910500	N_Shore	TTCTCTGTCTTCTGGGTGGAAATCTGGGTCAGGGAGGAAGGAAAGGAATGAAAAACCAAA[CG]GTGGTTCTCCAGGGGACTGGCCCAGGAGTAACTGGAGGGCACACTCAGGTACCCAGTGAC	CGGTGGTTCTCCAGGGGACTGGCCCAGGAGTAACTGGAGGGCACACTCAG			CHID1;CHID1;CHID1;CHID1;CHID1	NM_001142674;NM_023947;NM_001142676;NM_001142675;NM_001142677	5'UTR;5'UTR;5'UTR;5'UTR;5'UTR								0.725003	0.746251	0.0212483	909	380	1289
cg05347173	0.194345	3.36216	3.24992	0.00169113	0.999978	-1.63623	chr15	30057415	+	23704474		TTTTACTTCACTACTTACCCCTCAATCCTCTCTAATCTAATATCTTTTCC		II			NA	NA	NA	NA	NA	NA		OpenSea	AGCAAGCTAGAGACTGAAAAACTTCCACTAGATTTAGTGTGAACATTTTTGGGGGCAGAG[CG]GAAAAGATACCAGACCAGAGAGGATTGAGGGGTAAGTAGTGAAGTAAAAACAGCAAATGT	TTTACTTCACTACTTACCCCTCAATCCTCTCTGGTCTGGTATCTTTTCCG			TJP1;TJP1	NM_175610;NM_003257	Body;Body			TRUE					0.914679	0.902474	0.0122044	584	709	1293
cg02859655	-0.18276	3.03834	-3.23287	0.0017828	0.999978	-1.67125	chr19	3648642	-	42657324		ACCTATAAAACTACAAACCCRAACACCCACCTATAAAACTACAAAATATC		II			rs72620514	0.067871	NA	NA	NA	NA	chr19:3648526-3648766	Island	CCGGGGCGTCCACCTGTAGGACTGCAGACCCGGGCACCCACCTGTAGGACTGCAGGATGT[CG]ATGATGCCAATGTGCAGCAGCAGCCGCTCCCCGCGGCCGTTCACAGCGGGGATCCCGCCC	CGACATCCTGCAGTCCTACAGGTGGGTGCCCGGGTCTGCAGTCCTACAGG			PIP5K1C	NM_012398	Body				19:3599527-3599742				0.885647	0.898595	0.0129484	621	672	1293
cg13353050	0.203508	3.39139	3.25307	0.00167468	0.999978	-1.62974	chr3	32634406	-	33626402		AAAATATATATACAAATACCAAAACTATTCTTCTCAACRCTAAAACCTAC		II			NA	NA	NA	NA	NA	NA		OpenSea	GTAGAACAGGAAGAGTATGTATGCAAGTGCCAAGACTGTTCTTCTCAACGCTGAAGCCTG[CG]GAGAGGGGCGAGCTGAAGGATGCAGATGAAGGCCGGGAACCTGCACTGCTGAGCAATCGA	CGCAGGCTTCAGCGTTGAGAAGAACAGTCTTGGCACTTGCATACATACTC									3:32609398-32609710				0.916114	0.904225	0.011889	575	719	1294
cg07334717	0.21387	-3.82156	3.32203	0.00135016	0.999978	-1.4867	chr10	88855085	-	52758486		ATTAAAAATAACCCAAAAAAATCRAAATCRAAAACTAACCTCTATAAAAC		II			rs184717376	0.0174	NA	NA	NA	NA	chr10:88853757-88855498	Island	CCCTCAGGGGGGTTGGGGGTAGCCCAGGGAGGTCGGGGTCGGGGGCTGGCCTCTGTAGGG[CG]CTCAGAGGCCGAGTCCCCCCGAGCGCCGCGTGGGTGAGGCTTGGCGGTCTGGTCGGGGAC	CGCCCTACAGAGGCCAGCCCCCGACCCCGACCTCCCTGGGCTACCCCCAA			GLUD1;FAM35A	NM_005271;NM_019054	TSS1500;5'UTR				10:88843704-88845467	10:88854528-88855567	Promoter_Associated		0.0705521	0.061096	0.00945609	461	835	1296
cg23874775	0.13933	0.951847	3.12089	0.00251043	0.999978	-1.89803	chr7	157227097	+	26633318		AAAAAACAACTCCAAAACAAATATTATCAAATACTTCCCATTCRCTCCCC		II			NA	NA	NA	NA	NA	NA		OpenSea	AGGAAAGGTCAGGGCCACCAAACCTATCGCACAACCGCTGAAGTCAGCCACCCTGGCGGC[CG]GGGAGCGAATGGGAAGCACTTGACAACACCTGTCTTGGAGTTGCTTTTTGAAGCTTTGGT	AAAAGCAACTCCAAGACAGGTGTTGTCAAGTGCTTCCCATTCGCTCCCCG									7:156919776-156919866	7:157226646-157227295	Unclassified_Cell_type_specific		0.665794	0.645988	0.0198053	878	419	1297
cg24734418	-0.213174	3.20438	-3.20388	0.00194944	0.999978	-1.73051	chr15	25414781	+	55617414		TCCAAAACACRAAATCTCAATTATCCCAACCTTTTAAATCCCTCAAAATC		II			NA	NA	NA	NA	NA	NA		OpenSea	ATCCGGGTGTAGCTGGGGTTGCAGGCTTGGCAGGCACGGCGGCGGTATCGGGAGGCACAG[CG]ATCTTGAGGGACTCAAAAGGCTGGGACAACTGAGACCCCGTGTTCTGGAACTCGGCCTCC	CCAGAACACGGGGTCTCAGTTGTCCCAGCCTTTTGAGTCCCTCAAGATCG			SNORD115-1	NR_001291	TSS1500				15:22965850-22965875				0.895636	0.909409	0.0137727	676	626	1302
cg03744763	0.20919	-2.72613	3.15225	0.00228271	0.999978	-1.83508	chr7	27184737	-	62712431		TCTATTAAAACCCCCTTTATTCCTCRAACTTCCTTCCTATTCTAAAAAAC		II			NA	NA	NA	NA	NA	NA	chr7:27182613-27185562	Island	AGAGACTGGGCTCTGTTGGGGCCCCCTTTGTTCCTCGAGCTTCCTTCCTGTTCTGGGAGG[CG]GCTTGGGAGGCCGCGACAAGGCCGGGCTCCAGCTCTTAGACCCCCTCTTTCCACTGGCCA	CGCCTCCCAGAACAGGAAGGAAGCTCGAGGAACAAAGGGGGCCCCAACAG			HOXA5	NM_019102	TSS1500				7:27150952-27151569				0.139105	0.122313	0.0167921	793	509	1302
cg15709214	0.246985	3.81055	3.33178	0.00130937	0.999978	-1.46632	chr7	134463438	-	63615321		ACTAATTCTAACCCTCTTATAACACACATCCTAACCATAAAAAATTAATC		II			rs77814573	0.019531	NA	NA	NA	NA		OpenSea	CATTAGCATCTACTAATTCTGACCCTCTTATAGCACACATCCTAACCATGAAGAGTTGGT[CG]GAGCACTTTCAAGACGTCACCTGAACATTATGTCACCTCTGCGGGATATATGCATCTGTC	CTAATTCTGACCCTCTTATAGCACACATCCTAACCATGAAGAGTTGGTCG			CALD1;CALD1;CALD1	NM_033157;NM_033138;NM_004342	TSS1500;TSS1500;TSS1500								0.935353	0.926399	0.00895399	447	856	1303
cg18302726	-0.2568	2.74838	-3.14191	0.00235555	0.999978	-1.85588	chr7	93521093	-	43736451	35623321	TTTCAATTACCATAAATTAAATTTACCTATTCTTAAATTTCATATAAACA	TTTCGATTACCATAAATTAAATTTACCTATTCTTAAATTTCATATAAACG	I	A	Red	NA	NA	NA	NA	NA	NA	chr7:93519366-93520184	S_Shore	ACACTCTTCTCATTTCGATTACCATAGATTAGATTTGCCTATTCTTGAATTTCATATAAA[CG]GAATTATAAAGTATTCACTGTGTAGTATTTCTTTCTCACACTTCCTGTTTTTGAGATACG	TTTCGATTACCATAGATTAGATTTGCCTATTCTTGAATTTCATATAAACG			TFPI2	NM_006528	TSS1500								0.861487	0.879312	0.0178252	824	479	1303
cg08520191	-0.225323	2.93133	-3.19355	0.00201225	0.999978	-1.75153	chr12	132598679	-	62698387		CTAAATTTAATTTTCACATAAATACCTCTAATATTTTAATTCTAACTTCC		II			rs78396045	0.027802	NA	NA	NA	NA	chr12:132601226-132601984	N_Shelf	TTTTCTAAGCTCTAGATTTAGTTTTCACATGGATACCTCTGGTGTTTTAATTCTGGCTTC[CG]CTTTTGGTTAGCAGTTGTGACTTAGATTTCTTATCTACAAACTACTTCTGAAGCCTGGTT	CGGAAGCCAGAATTAAAACACCAGAGGTATCCATGTGAAAACTAAATCTA			EP400NL	NR_003290	Body								0.877041	0.891497	0.0144563	706	599	1305
cg12232463	-0.18651	1.59516	-3.08997	0.00275548	0.999978	-1.95964	chr2	100926650	+	48788346		AAAATCTAACTTCCAACCTTTTCCATAAAACCCTACCAAATCAATACTTC		II			NA	NA	NA	NA	NA	NA		OpenSea	ACTTAAGTCCAGCTACACAGAAGCCAAGACTGGCCTCTCTTTGAACTGACTTGCAGTCTA[CG]AAGTATTGACTTGGCAGGGTCCCATGGAAAAGGCTGGAAGCCAGACCTCAGAAAGGCAGA	AGGTCTGGCTTCCAGCCTTTTCCATGGGACCCTGCCAAGTCAATACTTCG		TRUE	LONRF2	NM_198461	Body								0.74149	0.764317	0.0228275	966	339	1305
cg10378364	-0.25587	-3.33879	-3.19095	0.00202833	0.999978	-1.75681	chr20	13202437	+	69744400	27678336	AATATACAACATAAACAACAACAACCCCAACAACAACAACAACTCAACCA	AATATACAACGTAAACAACAACAACCCCAACAACAACAACAACTCGACCG	I	C	Grn	NA	NA	NA	NA	NA	NA	chr20:13200670-13202616	Island	CGCCGCCGGCCGCCGCGCCGGGTCCTAAAGCCGCGCGTCTCAAAAGGATGGTGCGCCTGG[CG]GCCGAGCTGCTGCTGCTGCTGGGGCTGCTGCTGCTCACGCTGCACATCACCGTGCTGCGC	CGGCCGAGCTGCTGCTGCTGCTGGGGCTGCTGCTGCTCACGCTGCACATC			ISM1	NM_080826	1stExon				20:13148671-13150815			TRUE	0.0866156	0.101223	0.0146072	714	592	1306
cg02072484	-0.20187	2.12244	-3.10629	0.00262348	0.999978	-1.92717	chr5	9396355	-	37690428	11691472	TTAATATAACTACTTAACAAAACAATCTCTTTTAATTTAATACACATACA	TTAATATAACTACTTAACAAAACGATCTCTTTTAATTTAATACGCGTACG	I	T	Red	NA	NA	NA	NA	NA	NA		OpenSea	TGAGGCAGTTGGTTGGTATGGCTGCTTAACAGAACGGTCTCTTTTGATTTAATGCGCGTG[CG]TGCACACACACACACACACACACACACACACACAAATACATCCTAAGAGCTTAACATTAT	CGCACGCGCATTAAATCAAAAGAGACCGTTCTGTTAAGCAGCCATACCAA			SEMA5A	NM_003966	5'UTR			TRUE					0.803881	0.824614	0.0207334	913	393	1306
cg07329180	-0.224922	3.80075	-3.27955	0.00154226	0.999978	-1.57506	chr10	3374141	+	27765502		AAAAAACCTACTAACTTCCCRTTAAATTCRATAACACTCTCACACAAACC		II			rs735155	0.456422	NA	NA	NA	NA	chr10:3374119-3374383	Island	GCTCTGAACTTCCCTCTTGCCTGCTCTTTCTTGGGAAACCGGGCTAGTCGGGAGAATGAA[CG]GTCTGTGTGAGAGTGTCACCGAATTCAACGGGAAGCCAGCAGGTCTCCCTCTCCAGCGCG	CGGTCTGTGTGAGAGTGTCACCGAATTCAACGGGAAGCCAGCAGGTCTCC									10:3364077-3364383				0.9279	0.93864	0.01074	529	778	1307
cg03721281	0.296061	3.97283	3.25802	0.00164915	0.999978	-1.61955	chr17	40557138	-	55717319	31638410	AAATTTTCCTTAATCTTAAAACACATCTTCTCCAAATTCTCACAAATACA	AAATTTTCCTTAATCTTAAAACGCGTCTTCTCCAAATTCTCGCGAATACG	I	C	Grn	NA	NA	NA	NA	NA	NA	chr17:40556632-40557537	Island	CGCGTCTTCTCCAGGTTTTCCTTGGTCTTGAGGCGCGTCTTCTCCAGGTTCTCGCGGGTA[CG]CACCTTGGTCTTCTCCATCTTCTCCTTGGAGAAGGCCTTCTTGAAGTCGTCCACGCGCCG	AGGTTTTCCTTGGTCTTGAGGCGCGTCTTCTCCAGGTTCTCGCGGGTACG			PTRF	NM_012232	Body				17:37810159-37811008				0.942345	0.931057	0.011288	561	746	1307
cg22219248	0.2359	-4.03745	3.39093	0.00108565	0.999978	-1.34173	chr12	79257496	+	21617341	34757306	CAACTAAAACATAAATTCTCTCCCTACTTCCTCTCTTCCCAACTAAACCA	CGACTAAAACATAAATTCTCTCCCTACTTCCTCTCTTCCCAACTAAACCG	I	T	Red	NA	NA	NA	NA	NA	NA		OpenSea	TAGAGACAATCAGGTCACCACCGCCCTCACAAGAGAAAAGCTTCTTACTTCCGAGCAGAA[CG]GTTCAGCTGGGAAGAGAGGAAGCAGGGAGAGAATCTATGCTTTAGTCGTCACTGCTCTGG	CGGTTCAGCTGGGAAGAGAGGAAGCAGGGAGAGAATCTATGCTTTAGTCG			SYT1;SYT1	NM_005639;NM_001135805	TSS1500;TSS1500		CDMR		12:77781474-77781698	12:79257260-79259059	Unclassified_Cell_type_specific	TRUE	0.0611127	0.0538451	0.00726756	387	923	1310
cg16897634	0.285386	-4.15186	3.26943	0.0015917	0.999978	-1.59601	chr6	91006631	+	56756317	64647332	CCAACTCCCATAAAATTATTATAAATAAAAAACAAATAACATCAACACCA	CCGACTCCCGTAAAATTATTATAAATAAAAAACGAATAACGTCAACGCCG	I	A	Red	NA	NA	NA	NA	NA	NA	chr6:91004795-91006944	Island	CCGCGCGGCTTGCGCTCTCCCCGGAACGCCCACACTCTCAATCGCTACATTGTTGACATT[CG]GCGCTGACGTCACCCGCTCCCCATTCACAATAACTTTACGGGAGCCGGGCAGCGCACCTC	CGGCGCTGACGTCACCCGCTCCCCATTCACAATAACTTTACGGGAGCCGG			BACH2;BACH2	NM_021813;NM_001170794	TSS200;TSS200	high-CpG:91063274-91063365			6:91062190-91063808	6:91006442-91006864	Promoter_Associated	TRUE	0.0588884	0.0479453	0.0109431	547	765	1312
cg27465849	0.175557	2.17544	3.12986	0.00244325	0.999978	-1.88008	chr10	15084843	-	14808379		TTCTAAAACCAAACTACTTAAATTTACCCTCTAATCTATTTCCTACCCAC		II			NA	NA	NA	NA	NA	NA		OpenSea	AAAAGCATAGTTTCTGGAACCAGACTACTTGGATTTGCCCTCTGGTCTGTTTCCTACCCA[CG]TGTCTTTTTTTTTTTTTTTTTTTTTTTTTTGAGATGGAGGAGTCTCGCTCTGTCGCCCAG	CGTGGGTAGGAAACAGACCAGAGGGCAAATCCAAGTAGTCTGGTTCCAGA		TRUE	OLAH;OLAH	NM_001039702;NM_018324	TSS1500;TSS1500								0.824106	0.805698	0.0184083	849	463	1312
cg11436143	-0.201034	3.09219	-3.21188	0.00190203	0.999978	-1.71419	chr19	6040080	+	29615366		CCTCCCACAACATAATAAACATCACCATAAATATCRAAAAAAACCCCATC		II			NA	NA	NA	NA	NA	NA	chr19:6039990-6040228	Island	CCAGGGAGTGTCTGGTGCTGTCCATCCCCCCGTGGATGAGATAGGCTCCCGCGCTGGAGA[CG]ATGGGGCTCCCCCCGACATCCATGGTGATGCCCACCATGCTGTGGGAGGGGACCGCTGGC	CTCCCACAGCATGGTGGGCATCACCATGGATGTCGGGGGGAGCCCCATCG			RFX2;RFX2	NM_000635;NM_134433	Body;Body				19:5990826-5991284				0.888918	0.902074	0.0131556	655	658	1313
cg01176329	0.133001	1.41639	3.12354	0.0024904	0.999978	-1.89273	chr6	29592381	+	18706331		ACTTCCACCCCCCAATATCTTTTTTTCTAATAAACCTATCAAATATCAAC		II			rs2267635	0.054716	NA	NA	NA	NA	chr6:29595298-29595795	N_Shelf	GAGAGAACAGGAACAAGACCAGTAGGGGGTCCCGCTCAGTGATCCATCCCTCCTGCTGGG[CG]CTGACATTTGACAGGTCCATTAGAAAAAAAGACACTGGGGGGTGGAAGTAGGGAAGAATG	CTTCCACCCCCCAGTGTCTTTTTTTCTAATGGACCTGTCAAATGTCAGCG			GABBR1;GABBR1;GABBR1	NM_021904;NM_021903;NM_001470	Body;Body;Body								0.733648	0.714707	0.0189409	872	442	1314
cg18852414	0.192731	1.73456	3.07845	0.00285232	0.999978	-1.98247	chr1	214477280	-	54608497		RATATCTCCACAAATCCAAAAACTAACTTCACCRAAATAAACAAAAATTC		II			NA	NA	NA	NA	NA	NA		OpenSea	TTCGTGCTGTCGGTATCTCCACAAGTCCAGAAGCTGGCTTCACCGGGGTGGGCAAGAGTT[CG]ACAGCAGGTTTTACCGATTGCGCTCTGACTTAGACAATGTAATTGTTCCCCACTTGGGAA	GTATCTCCACAAGTCCAGAAGCTGGCTTCACCGGGGTGGGCAAGAGTTCG			SMYD2	NM_020197	Body				1:212543686-212543904				0.775749	0.7524	0.0233492	995	320	1315
cg26447107	-0.184359	3.56826	-3.31644	0.0013741	0.999978	-1.49838	chr13	113465038	+	67744428		AAACAATTACTAAACTTCACCAACRTAAATATATCRAATATCACTTACTC		II			NA	NA	NA	NA	NA	NA	chr13:113464191-113464413	S_Shore	CAGTGTCCTGTTCATTTCATTCAGCACGGCAAGCTCGTTCGGAAACAAAGTCGAAAGCTG[CG]AGTAAGTGACACCCGACACATTTACGCTGGTGAAGTCCAGTAACTGTTTAAAAAATAAGT	AACAGTTACTGGACTTCACCAGCGTAAATGTGTCGGGTGTCACTTACTCG			ATP11A;ATP11A	NM_015205;NM_032189	Body;Body				13:112513005-112513055				0.918075	0.92717	0.00909492	468	848	1316
cg21618439	-0.258985	-4.2056	-3.32839	0.0013234	0.999978	-1.4734	chr9	100954694	+	11794309	17782373	AAAAATACAAAACTCAAAACACAAAAAACCTAACTTTCAACCCCTTTACA	AAAAATACGAAACTCGAAACGCGAAAAACCTAACTTTCAACCCCTTTACG	I	T	Red	rs111241578	0.032952	NA	NA	NA	NA	chr9:100954734-100955165	N_Shore	GCAAGCTATCCTGACGGGGAAACTGAGGCCTGGAGAGGAGCAGTGCTTTGTGCAAGGTCA[CG]CAAAGGGGCTGAAAGCCAGGTCCCCCGCGCTCCGAGCCCCGCATCCCTCCCTCTCCGGGA	CGCAAAGGGGCTGAAAGCCAGGTCCCCCGCGCTCCGAGCCCCGCATCCCT		TRUE	CORO2A	NM_052820	5'UTR				9:99994150-99995314				0.0495073	0.0582143	0.00870704	452	867	1319
cg17661781	-0.168677	3.30885	-3.31336	0.00138744	0.999978	-1.5048	chr11	33667433	+	56625346		CACCTCCRAATAAAACAAATACTAAACTAAACCRTAAACCTCTTAATACC		II			NA	NA	NA	NA	NA	NA		OpenSea	ATGCACATGCTGCTGGAGGAGGCCTTCAGCCTGGCATCCGCGGGCCACGCAGGCCAGAGC[CG]GCACCAAGAGGCCTACGGCTCAGCCCAGCACCTGCCCTATTCGGAGGTGGTGACCAGCGC	CGGCACCAAGAGGCCTACGGCTCAGCCCAGCACCTGCCCTATTCGGAGGT			C11orf41	NM_012194	Body				11:33623987-33624088				0.904179	0.913447	0.0092676	476	843	1319
cg24681654	-0.156369	2.55819	-3.22041	0.00185271	0.999978	-1.69677	chr7	31555516	+	72645374		CTCCTAACACAATACTTTTATCATCTTATATAAAACAAAAACTCAACCTC		II			NA	NA	NA	NA	NA	NA		OpenSea	GAACAAGAGAATGAAGGGAGCAGGGAACAAGCAGCTCTCCAAAATGTTGTGAAGTTTTAA[CG]AGGCTGAGCTTCTGTTTCATATAAGATGATAAAAGTACTGTGTTAGGAGAAGAAACAGGC	CGAGGCTGAGCTTCTGTTTCATATAAGATGATAAAAGTACTGTGTTAGGA			CCDC129	NM_194300	TSS1500								0.849273	0.862111	0.0128384	643	679	1322
cg24143137	0.104686	-0.379798	3.13635	0.00239563	0.999978	-1.86705	chr10	103995782	+	35622471		TCTATTACCTACCTAACTTTACTATTCTTTCCTTCTCTCTTCAATTTCAC		II			NA	NA	NA	NA	NA	NA	chr10:103990213-103991829	S_Shelf	AGGCTCTTGCATGGGCTAGTAACAGCAGAGAGAGGAGCCACAGCTGAGAAGGGACCTGAC[CG]TGAAACTGAAGAGAGAAGGAAAGAACAGTAAAGCCAGGCAGGCAATAGAGAGATGGAAGG	CTATTGCCTGCCTGGCTTTACTGTTCTTTCCTTCTCTCTTCAGTTTCACG			PITX3	NM_005029	5'UTR								0.441031	0.423624	0.0174074	835	487	1322
cg02891522	-0.136054	2.93026	-3.28599	0.00151158	0.999978	-1.56172	chr4	1976232	+	66730396		CCTAACCAAATAACACTCAAAAACAAAAACAAAACTCACCCTAACTAAAC		II			NA	NA	NA	NA	NA	NA		OpenSea	CTCAGGTGATCTGCCTGCTTCAGCCTCCCAAAGTGCTGGGATTACAGGCGTGAGCCACTG[CG]CCCAGCCAGGGTGAGTCTTGTTCTTGTCCTTGAGTGCCACTTGGCTAGGCTGTTGCTGCT	CGCCCAGCCAGGGTGAGTCTTGTTCTTGTCCTTGAGTGCCACTTGGCTAG			WHSC1;WHSC1;WHSC1;SCARNA22;WHSC1	NM_001042424;NM_133330;NM_133331;NR_003004;NM_133335	Body;Body;Body;TSS200;Body								0.879787	0.889847	0.0100609	518	805	1323
cg27659679	0.149272	2.4375	3.20433	0.00194674	0.999978	-1.72959	chr15	41777598	-	29796452		ACTCCAAATAAAAACTCCCACTAAAAAACCCTAAACTAACCTAAAAATAC		II			NA	NA	NA	NA	NA	NA	chr15:41778393-41778988	N_Shore	AAGAAACCCTGACTCCAGATGGAGGCTCCCACTGGGAGACCCTGGGCTGGCCTAGGGATG[CG]TCCAGAGAAAGTGTGCTGCCTCTGGGCCAGGCCCTCGTTGCTGTCATTCCCCACAGGCCA	CGCATCCCTAGGCCAGCCCAGGGTCTCCCAGTGGGAGCCTCCATCTGGAG													0.848176	0.834812	0.0133632	673	651	1324
cg23679004	0.173481	3.03606	3.23542	0.00176882	0.999978	-1.66603	chr8	6914549	+	59612433		ATCTTCAAAAAACAAAAAACATTTAATCCCCAAACTTCTTAAATAAAAAC		II			rs4610775	0.024055	NA	NA	NA	NA		OpenSea	GTTCTGTTTCCCATCTGCTTGAGTATTTACTTTTATATATTCAAAAAAGAAAAACAACAG[CG]CTTTCATTCAAGAAGTTTGGGGATCAAATGCCTCTTGTTTTCTGAAGATGGTCCCTGGTA	TCTTCAGAAAACAAGAGGCATTTGATCCCCAAACTTCTTGAATGAAAGCG			DEFA5	NM_021010	TSS1500								0.894785	0.882551	0.0122339	617	708	1325
cg06735849	-0.256075	3.38497	-3.22032	0.0018532	0.999978	-1.69694	chr2	169526280	-	20673390		TAATCAAATATTTCCCRAAAATAACAACCACTACATAAAATTATATACTC		II			rs74558296	0.052517	NA	NA	NA	NA		OpenSea	TTTATAGCATTTGATCAAATGTTTCCCGGGAATAACAACCACTGCATAAAGTTATATACT[CG]CAGGTTACTCTGAGACATAAATTAGGAGATTGTCATAAGAACTCATATATCTTAACATAC	GATCAAATGTTTCCCGGGAATAACAACCACTGCATAAAGTTATATACTCG			LASS6	NM_203463	Body			TRUE					0.906097	0.918918	0.0128216	644	681	1325
cg07384961	0.195914	-2.84775	3.15989	0.0022303	0.999978	-1.8197	chr16	3068128	+	25609401		CCTAAAAATTTCCCTTATCTCCTTCRCAAATAAATCCRAAACTAATATAC		II			NA	NA	NA	NA	NA	NA	chr16:3067521-3068358	Island	CGCACCCCTACCCACGCCGCCACCACCCTGCACCCGGCCCCAAGAGGCGTCTCTCCAACA[CG]CACACTAGCCCCGGACTCACCTGCGAAGGAGATAAGGGAAATTCCTAGGCCGAGTGTCGG	CGCACACTAGCCCCGGACTCACCTGCGAAGGAGATAAGGGAAATTCCTAG		TRUE	CLDN6	NM_021195	5'UTR				16:3007523-3008439			TRUE	0.129133	0.113365	0.0157676	776	549	1325
cg05463656	-0.190647	3.34606	-3.26195	0.00162916	0.999978	-1.61145	chr1	1992687	+	13733315		AAACAAACCCCAAACCCCCAAACAAAATTAAAACAAAAAACAAACATATC		II			NA	NA	NA	NA	NA	NA	chr1:1990779-1991171	S_Shore	GAGGTATCCACATGCGGCCAGTGTAGCCCCTGGGCGCGGGGGAAGCCCACCGTATTTCTC[CG]ACATGTCTGCCTCTTGTCTCAACCCTGCCTGGGGGCCTGGGGTCTGCTCTTTCTGTCTAC	AGCAGACCCCAGGCCCCCAGGCAGGGTTGAGACAAGAGGCAGACATGTCG			PRKCZ	NM_002744	Body				1:1982331-1982956				0.905436	0.916355	0.0109187	557	769	1326
cg17127262	-0.220864	2.75648	-3.16919	0.00216793	0.999978	-1.80091	chr15	77708914	-	27799412		TACAAATCTAATTCTACCACAACATAATTTTTTTTCCCCACTAAATCCCC		II			NA	NA	NA	NA	NA	NA	chr15:77711625-77712910	N_Shelf	CAGGTCTAAAATACAAATCTGATTCTACCACAGCATAATTTTTTTTCCCCACTAAATCCC[CG]CAACTTTTGGAATTAAGTTAAAGTTATTAACTTGGTTCACAAGACAATCATTGATTTGGC	CGGGGATTTAGTGGGGAAAAAAAATTATGCTGTGGTAGAATCAGATTTGT													0.863698	0.87889	0.0151916	755	573	1328
cg12219828	-0.290415	-3.6498	-3.19701	0.00199099	0.999978	-1.74449	chr19	42757867	+	13745399	45638414	CTCAACAAATAAAAACAACTTAATCTTAAAAAACTCCAAACTAAAATCCA	CTCGACGAATAAAAACGACTTAATCTTAAAAAACTCCGAACTAAAATCCG	I	A	Red	NA	NA	NA	NA	NA	NA	chr19:42757495-42759475	Island	TCCGCACCCCGGCCCCACCCCCAGGGCCCCTCCTCGGTCCGGGTCCCAATCCCCTGGCGC[CG]GATCCCAGCTCGGAGCCCTTTAAGATTAAGCCGCCCCCACCCGCCGAGCAGGGGGATGGG	CTCGGCGGGTGGGGGCGGCTTAATCTTAAAGGGCTCCGAGCTGGGATCCG			ERF	NM_006494	Body				19:47449262-47451417	19:42757823-42758228	Promoter_Associated		0.0709882	0.084696	0.0137078	698	631	1329
cg27258593	-0.207887	3.31552	-3.24913	0.0016953	0.999978	-1.63786	chr11	65793238	-	34645346		TAATAATAAAACCAACCACRATAAAAAACTTAATAATACTAAAACTCATC		II			NA	NA	NA	NA	NA	NA	chr11:65789909-65790168	S_Shelf	GGTGGACTTGGTGATGGTGGGGCCAGCCACGGTGGGGGACTTGGTGATGCTGGGACTCAT[CG]TGTTGGAGCCCGCTAAGGTGGGAAGCCTCGCTGTGGTGGAAGGACTCACTGTAGGGATTG	GATGGTGGGGCCAGCCACGGTGGGGGACTTGGTGATGCTGGGACTCATCG			CATSPER1	NM_053054	1stExon				11:65549315-65550181				0.903272	0.914733	0.0114613	589	741	1330
cg03055065	0.173448	-4.12637	3.41925	0.000991783	0.999978	-1.28156	chr12	4671310	-	17803504		AAAACCACAACCTAAAAAAACCCTTCCAACTCTAAAATCATAAAAAAAAC		II			NA	NA	NA	NA	NA	NA	chr12:4671309-4671704	Island	CAAGGTGGTTTGGGACCACAGCCTGAGAAAGCCCTTCCAGCTCTGGAGTCATAAAAAGGG[CG]GGAGCCGTTTCTATAGCGACGGGAGGAGGGCGTGGCCGTCCCTTGCCCTCTGCCGGGCTC	CGCCCTTTTTATGACTCCAGAGCTGGAAGGGCTTTCTCAGGCTGTGGTCC								TRUE	12:4541571-4542141			TRUE	0.056665	0.0511863	0.00547861	349	983	1332
cg13790571	0.171457	-4.02962	3.40064	0.00105256	0.999978	-1.32114	chr17	58156411	+	44696354		CCAAACCAATTTCTAACAAACATCTACAAAATACCRATCRAAAAAATCCC		II			rs2087840	0.000228	NA	NA	NA	NA	chr17:58156010-58156427	Island	TCTAGTTCCGAAAGTACCTTTTTTAGACCGGACTGGGGCTCAGAGGGGTTTCCATGACTA[CG]GGACTCCTCCGACCGGTACCCTGCAGATGCTTGTCAGAAATTGGCTTGGAGGCCGGGCTC	CGGGACTCCTCCGACCGGTACCCTGCAGATGCTTGTCAGAAATTGGCTTG		TRUE	HEATR6	NM_022070	TSS200				17:55510564-55511194	17:58155190-58156589	Promoter_Associated		0.0604937	0.0542813	0.00621236	370	963	1333
cg25455408	-0.170666	1.99149	-3.1002	0.00267201	0.999978	-1.9393	chr19	42274924	-	56705368		CTTCACCTAACTAAAAACAAACAAACTACAAACCATAATAAAAAATTAAC		II			rs10403840	0.461677	NA	NA	NA	NA		OpenSea	CCACTCAGAGACTTCACCTAACTAGAGACAGGCAAACTGCAAACCATGGTGAGAAATTGA[CG]ACTTCACACTATGGACAGCTTTTCCCAAGATGTCAAAACAAGACTCCTCATCATGATAAG	TTCACCTAACTAGAGACAGGCAAACTGCAAACCATGGTGAGAAATTGACG			CEACAM6	NM_002483	3'UTR	low-CpG:46966677-46967166							0.79032	0.810664	0.0203446	933	403	1336
cg09475402	-0.187077	-2.2293	-3.12938	0.00244679	0.999978	-1.88104	chr22	47158619	-	43769353	33787502	CTAAAATCCCAAAAACAATAAAAAACCACCCAAAACACAAAAAAAAACCA	CTAAAATCCCGAAAACAATAAAAAACCACCCGAAACACAAAAAAAAACCG	I	C	Grn	NA	NA	NA	NA	NA	NA	chr22:47158067-47158980	Island	CGGCTCTAGGCTCTGGAGTCCCGGGAGCAGTGAGGGGCCACCCGGGGCACAGGAAAGGGC[CG]CTAGGGGAGGGCCGGGTGCACTCGGGGTGTCTGGGCCGCGGGTCTGAGGGATGAGGAGGG	CGGCCCTTTCCTGTGCCCCGGGTGGCCCCTCACTGCTCCCGGGACTCCAG			TBC1D22A;TBC1D22A	NM_014346;NM_014346	1stExon;5'UTR				22:45536619-45537627	22:47157722-47159430	Promoter_Associated		0.170931	0.188354	0.0174232	851	486	1337
cg01678472	-0.152596	2.37095	-3.19715	0.00199013	0.999978	-1.74421	chr17	73056797	+	15685417	20698409	TAAAATCATATTTACTCAAACAATTAATCCCAAAATAACAAATAACAACA	TAAAATCATATTTACTCAAACGATTAATCCCAAAATAACGAATAACGACG	I	A	Red	rs116972075	0.013455	NA	NA	NA	NA		OpenSea	GGGCCCGGCCAGGGAGGGCGCGCGTGCGAGGGCGGGTCAGGCTGCACTCAGGGTCTCGGT[CG]CCGCCACTCGCCACCCTGGGATCAACCGCCTGAGTAAATATGATTTTATACGGATTATGC	CGCCGCCACTCGCCACCCTGGGATCAACCGCCTGAGTAAATATGATTTTA			KCTD2	NM_015353	Body				17:70568276-70568403			TRUE	0.832191	0.845651	0.01346	697	642	1339
cg08947551	0.142377	2.30443	3.18444	0.00206916	0.999978	-1.77002	chr5	176655497	+	15606336		TAATAATAACAATCTAAATCATTCAACCTAAACCRAAACTAATAACTCRC		II			NA	NA	NA	NA	NA	NA		OpenSea	TGAACTCCTGACCTCAAGTGATCCACCTGCCTCGACCTCCCAAAGTGCTGGGATTACAGG[CG]CGAGTCACCAGCCCCGGCCTAGGCTGAATGATCTAGATTGCCACTATTAGGAATGGTTTT	CGCGAGTCACCAGCCCCGGCCTAGGCTGAATGATCTAGATTGCCACTATT	TRUE		NSD1;NSD1	NM_172349;NM_022455	Body;Body								0.835964	0.821881	0.014083	727	614	1341
cg19029904	-0.242702	-2.85159	-3.10011	0.00267271	0.999978	-1.93947	chr13	79161619	-	58760413		TTATTAATCACCTTTAACATAAAATATCTTATATATAAATTCRAACCATC		II			NA	NA	NA	NA	NA	NA		OpenSea	ACCCTCCCTGTTTATTGATCACCTTTGGCATGAAATATCTTGTATATGGGTTCGGACCAT[CG]CGAAGGTTTCAGACACAAACAAGCTACAGCAACACTTTCTCTACGCATCCCCTAGTTATT	TATTGATCACCTTTGGCATGAAATATCTTGTATATGGGTTCGGACCATCG									13:78059469-78059871				0.116763	0.136679	0.019916	934	413	1347
cg05125875	-0.196119	3.6064	-3.28571	0.00151292	0.999978	-1.56231	chr15	40425922	+	60740339	54803322	AATAATTCTCATCACCCACCTCCCTACAATATAAATCATAATATCCAACA	AATAATTCTCATCGCCCGCCTCCCTACGATATAAATCATAATATCCAACG	I	A	Red	rs8041724	0.02147	NA	NA	NA	NA		OpenSea	TAGCAAGAGGGTGGACACATAGCAAGAGGATGCGGGGAGTAATATCGCCCCCTTCTCCCC[CG]CTGGATATTATGATCCACATCGCAGGGAGGCGGGCGATGAGAATTATTAGGGGGTGGAAG	AATAATTCTCATCGCCCGCCTCCCTGCGATGTGGATCATAATATCCAGCG									15:38213186-38213369				0.919637	0.929325	0.00968769	520	828	1348
cg13481126	0.180805	2.65874	3.16559	0.00219184	0.999978	-1.80818	chr22	49719916	+	66655453		TTCCCTTCTCCAAAAAATATCCTAACRACAATTCTATACACCAAAAAACC		II			NA	NA	NA	NA	NA	NA	chr22:49717505-49717921	S_Shore	ACCTGAGGTCACGCACGCAGGCGTTGCCCACGCCGGGAAAGGCGTTTCAGGAGAGCATGC[CG]GCCTCCTGGTGCACAGAACTGCCGTCAGGACATTCCCTGGAGAAGGGAACAGAGGGAGAC	CGGCCTCCTGGTGCACAGAACTGCCGTCAGGACATTCCCTGGAGAAGGGA							CDMR						0.867444	0.852559	0.0148844	764	585	1349
cg06518222	0.129935	-3.20394	3.3304	0.00131509	0.999978	-1.46921	chr5	175788872	-	54749398		RCRAAACTTAACCCAACRAAACACAAAACATACTAAAAATTATTATCCAC		II			NA	NA	NA	NA	NA	NA	chr5:175788321-175788998	Island	CGGGATCTCGCGCGAGACTTGGCCCAGCGGAGCACAGGGCATGCTGGGAGTTGTTGTCCA[CG]ATCGCGAGACCCGCCCCCTCCCCATGCCCTTCGCCGCCCAGCGAGTTGTGGAGCCGCAGC	CGTGGACAACAACTCCCAGCATGCCCTGTGCTCCGCTGGGCCAAGTCTCG			KIAA1191;KIAA1191;KIAA1191	NM_020444;NM_001079684;NM_001079685	TSS200;TSS200;TSS200				5:175720568-175721903	5:175788109-175789590	Promoter_Associated		0.101202	0.0933764	0.00782527	448	902	1350
cg27635394	-0.219172	-3.43517	-3.20005	0.00197252	0.999978	-1.73831	chr6	26043820	+	18647444		AAATCTACTCCAACCCCTAAAAAAAATTCTAAAAAAACTATCACTAAAAC		II			NA	NA	NA	NA	NA	NA	chr6:26044203-26044469	N_Shore	CACATAGATAGAATAGCTCTCCTTGCGGCTGCGCTTACGCTTCTTACCATCCTTCTTCTG[CG]CCTTAGTGATAGCCTTCTTAGAACCCTTTTTAGGGGCTGGAGCAGACTTAGAGGGTTCAG	CGCCTTAGTGATAGCCTTCTTAGAACCCTTTTTAGGGGCTGGAGCAGACT			HIST1H2BB	NM_021062	1stExon		RDMR		6:26151601-26151800			TRUE	0.0812979	0.0943786	0.0130807	688	662	1350
cg08781140	-0.22173	-2.18422	-3.07816	0.00285482	0.999978	-1.98305	chr17	73584617	-	51746424	73660458	AAAACCTCAATAAAAACACATCAAATAAAAACAAAAACAACTCCTATCCA	AAAACCTCAATAAAAACACGTCGAATAAAAACGAAAACAACTCCTATCCG	I	A	Red	rs74841633	0.01086	NA	NA	NA	NA	chr17:73583838-73586337	Island	GCCGGACGCCCAGGAGCCTCAATGGGGACACGTCGGGTGGGGACGGAGGCAGCTCCTGTC[CG]GACAGCGAAACCCGCGAGGCCCAGGAGAGCGGCAGCCAGCGCGGCACAGCCCGGGAGCTG	GGAGCCTCAATGGGGACACGTCGGGTGGGGACGGAGGCAGCTCCTGTCCG			MYO15B	NR_003587	Body		DMR		17:71095472-71097932				0.174492	0.196687	0.0221955	997	356	1353
cg22255355	0.314395	-4.14933	3.2646	0.00161577	0.999978	-1.60597	chr19	58838374	-	73670344	46700326	AATACACTTAAACTTCCAAAAAACACCAAAAATTATAATCCTAACAAACA	AATACACTTAAACTTCCGAAAAACGCCGAAAATTATAATCCTAACGAACG	I	T	Red	NA	NA	NA	NA	NA	NA	chr19:58838198-58838639	Island	GCACCGCGCCTGGGTACACTTGAGCTTCCGGAGGACGCCGGGAATTGTAGTCCTGGCGGG[CG]TGGGCCCTTGAGGTGTGCTGGGAGCTGTGGTCCGGGTCGGCGGGCGCGCAAGTTGGCTAG	CGCCCGCCAGGACTACAATTCCCGGCGTCCTCCGGAAGCTCAAGTGTACC		TRUE	ZSCAN22	NM_181846	TSS200	high-CpG:63529938-63530429			19:63530092-63530736	19:58838032-58839234	Promoter_Associated		0.0589915	0.0488459	0.0101456	553	801	1354
cg05720429	0.14233	-4.02275	3.40279	0.00104538	0.999978	-1.31658	chr4	144435908	+	61749373		CTAATTCATTCCTACACTTATTCATCCCCCCTAAATTAAACRAAAAATCC		II			rs1510882	0.180153	NA	NA	NA	NA	chr4:144434249-144435343	S_Shore	AGGCCCCTCCCAGGCACTATTCCACTGGAAGGGAAGCAACCAAGGCAGCAGCAGCTGTCT[CG]GATCCCCCGTCTAATTTAGGGGGGATGAATAAGTGTAGGAATGAATTAGAGAACCAGGCG	CGGATCCCCCGTCTAATTTAGGGGGGATGAATAAGTGTAGGAATGAATTA			SMARCA5	NM_003601	Body								0.0602035	0.0550276	0.0051759	367	989	1356
cg16935734	0.199602	3.27627	3.21237	0.00189915	0.999978	-1.71318	chr18	77901368	+	20637305		ACAACCTTACATATATTTTTCCTCTCAAAATACACAACTAAATCATTTAC		II			NA	NA	NA	NA	NA	NA	chr18:77905297-77905566	N_Shelf	AGGGATCTTTAGGCCCATCATGGTGTCCAGTTCAAAACAAATACTAATACCAGTCATTCA[CG]CAAATGATTCAGCTGTGCATTTTGAGAGGAAAAATATATGTAAGGTTGCTAAACAGTAGC	CGCAAATGATTCAGCTGTGCATTTTGAGAGGAAAAATATATGTAAGGTTG								TRUE					0.909739	0.897294	0.0124451	654	702	1356
cg19173440	-0.220071	-3.79052	-3.2744	0.00156722	0.999978	-1.58572	chr11	78128696	+	29718306	59703368	ATATACACCAACTAACTAAAAAAATCACCTCCCAAAAAAAAATTAAAACA	ATATACACCGACTAACTAAAAAAATCGCCTCCCGAAAAAAAATTAAAACG	I	C	Grn	NA	NA	NA	NA	NA	NA	chr11:78127965-78129400	Island	TCCGCAGGCCCCGGAGCGCCCCCCGCCCGCCCCTGGGCGGCCGCGCCCGCACTCACATAG[CG]CCTCAACTTCTTCTCGGGAGGCGATTTCCTCAGCCAGCCGGTGCACACCACGTCGCCGCC	CGCCTCAACTTCTTCTCGGGAGGCGATTTCCTCAGCCAGCCGGTGCACAC			GAB2	NM_080491	1stExon				11:77805505-77807048	11:78127403-78129362	Promoter_Associated	TRUE	0.0649751	0.0747526	0.00977756	538	819	1357
cg20064897	0.174152	2.37988	3.15707	0.0022495	0.999978	-1.82538	chr12	132900620	+	12711353		CCTATTCATTTATAAATTTTATTTCCCAAATAACTCCTACTAATTCAAAC		II			NA	NA	NA	NA	NA	NA	chr12:132900224-132901089	Island	TTGTAATACACGGAGGGAATTCAGGGGAGGGTAGAGACGATGAACTCAAGCTGGAAAGGC[CG]CCTGAACCAGCAGGAGCCATTTGGGAAATAAAACTCACAAATGAATAGGAAAAGCTTTCT	CTATTCATTTGTGAGTTTTATTTCCCAAATGGCTCCTGCTGGTTCAGGCG			GALNT9	NM_001122636	Body				12:131410466-131410694	12:132899855-132900806	Unclassified_Cell_type_specific		0.843096	0.827974	0.0151224	784	577	1361
cg22117582	-0.188351	3.40782	-3.24168	0.00173486	0.999978	-1.65317	chr15	80218702	+	31770313	57807348	AAAATCAATACTCATCAAAAAAACTCAACCATAACCAACTACAAATCCCA	AAAATCGATACTCGTCGAAAAAACTCAACCATAACCGACTACAAATCCCG	I	A	Red	NA	NA	NA	NA	NA	NA	chr15:80215358-80216500	S_Shelf	CCACCGGCGCTGCGCTCCATTTCTTGCCGGGCCTTAGGTGCCTCCCCGCGGGGCAGGGCT[CG]GGACCTGCAGCCGGCTATGGCTGAGCCTCCCCGACGAGCACCGACCCCTGCTCCACGGCG	CGGGACCTGCAGCCGGCTATGGCTGAGCCTCCCCGACGAGCACCGACCCC									15:78005517-78005831				0.90884	0.919907	0.0110667	606	757	1363
cg01233638	0.124344	-3.29193	3.32871	0.00132211	0.999978	-1.47275	chr13	53226396	+	34784346		AATCATTCTACACTAATAACRACAAAAAACCTTCTAATTCCTAAAACRAC		II			rs6561673	0.03151	NA	NA	NA	NA	chr13:53226382-53226960	Island	ACTAAGAAGAAAGCCTGGGCTGTGGCGTTCTGGGGAAGTGAATAGTACGGCCGCCGGGCG[CG]TCGCCCCAGGAACCAGAAGGCTTTTTGCCGCTATTAGTGCAGAATGACTTCCGGCAAGTC	GTCATTCTGCACTAATAGCGGCAAAAAGCCTTCTGGTTCCTGGGGCGACG			SUGT1;SUGT1	NM_006704;NM_001130912	TSS1500;TSS1500				13:52124301-52125417	13:53226106-53227822	Promoter_Associated		0.0957828	0.0882381	0.00754473	451	914	1365
cg03945320	0.326715	-4.04163	3.21395	0.00188995	0.999978	-1.70996	chr16	733905	-	56618486	15763443	TCACCAAATTATCCATAAATCCCTACAAAATAACAAACCTAACAAAAACA	TCACCGAATTATCCGTAAATCCCTACAAAATAACGAACCTAACGAAAACG	I	T	Red	NA	NA	NA	NA	NA	NA	chr16:729438-735815	Island	ACGGGCACGCGCTCACCGAGTTGTCCGTGAGTCCCTGCAGGATGACGGGCCTGACGAAGG[CG]TACCTGGAAAGAAGGGCAGAGTCGCGGCCAGGCCGGACCGCCAGCCTCGCCGCCCCAGCC	CGCCTTCGTCAGGCCCGTCATCCTGCAGGGACTCACGGACAACTCGGTGA			JMJD8	NM_001005920	Body				16:672545-675921	16:733720-734955	Promoter_Associated		0.063847	0.0518842	0.0119629	651	716	1367
cg02115397	-0.232198	3.81697	-3.25686	0.00165514	0.999978	-1.62195	chr6	32975850	-	22690491		CTACTACRATTAAAACRCTCCACCAAAATATCCAAATAAACTTTAATTAC		II			rs11575906	0.010751	NA	NA	NA	NA	chr6:32975684-32975926	Island	CGTTGATGGCTCTGCTGCGGTTGGAGCGCTCCACCAGGATGTCCAGATGGGCTTTGATTG[CG]GCGATGCCGGCCAGCCCGCCCTGCGGGTCAAAGCGGGCAAAGTCACCAAACTCAGGCAGA	TGCTGCGGTTGGAGCGCTCCACCAGGATGTCCAGATGGGCTTTGATTGCG			HLA-DOA	NM_002119	Body				6:33083762-33083904				0.928822	0.938847	0.0100244	562	808	1370
cg19741777	0.112056	0.24333	3.10072	0.00266785	0.999978	-1.93826	chr19	48965833	+	20698473		CACATACCTTTCTATTAAATTTACATCCCCAACTACCCAATAACCCATTC		II			NA	NA	NA	NA	NA	NA	chr19:48965002-48965792	S_Shore	GTGCGGTCCTGGAGGGGGCGTGGACTACAACTCCCAGCAGCCTCTTGGGCCTGGGGCCTG[CG]AATGGGTCACTGGGCAGCTGGGGATGTAAACCCAACAGAAAGGTATGTGACCAGCTCTTC	ACATACCTTTCTGTTGGGTTTACATCCCCAGCTGCCCAGTGACCCATTCG			KCNJ14;KCNJ14	NM_170720;NM_013348	Body;Body							TRUE	0.548895	0.52982	0.0190754	931	439	1370
cg02022808	-0.198118	-2.11398	-3.08385	0.00280654	0.999978	-1.97177	chr5	140744914	-	24777398		ATAAAAACRCTCTTATTACCAACRCTAAAATAATAATCACAATACAAAAC		II			NA	NA	NA	NA	NA	NA	chr5:140745531-140745893	N_Shore	GGTAGCTCAGGATGGAGGCGCTCTTGTTGCCAGCGCTAAGGTGGTGGTCACAGTACAGGA[CG]TGAATGACAATGCCCCCGAAGTGATCCTCACCTCTCTGACCAGTTCGATCTCTGAAGACT	CGTCCTGTACTGTGACCACCACCTTAGCGCTGGCAACAAGAGCGCCTCCA			PCDHGA4;PCDHGA2;PCDHGA5;PCDHGB2;PCDHGA1;PCDHGB1;PCDHGA3;PCDHGA5	NM_018917;NM_018915;NM_032054;NM_018923;NM_018912;NM_018922;NM_018916;NM_018918	Body;Body;1stExon;Body;Body;Body;Body;1stExon				5:140725056-140725168				0.181876	0.202628	0.0207523	982	392	1374
cg10963543	-0.166151	-1.35674	-3.07916	0.00284624	0.999978	-1.98106	chr1	151226935	+	36743326	37733316	AATCTCAAAAAAACTATAAAAAAACCTTTAAAAATACTATATCAATTCCA	AATCTCAAAAAAACTATAAAAAAACCTTTAAAAATACTATATCGATTCCG	I	A	Red	NA	NA	NA	NA	NA	NA		OpenSea	GCTAACAGGCGTGAGCCACCGCGCTCGGCCGATCCCGACACTTTTTTAAAATGCCGAAGC[CG]GAATCGACACAGCACTTTCAAAGGTTCCTCCATAGCTCCCCTGAGATCCGGCCAGCGGGA	GATCTCAGGGGAGCTATGGAGGAACCTTTGAAAGTGCTGTGTCGATTCCG			PSMD4	NM_002810	TSS1500					1:151226935-151227731	Promoter_Associated		0.274267	0.295396	0.0211285	993	382	1375
cg02981989	-0.18761	3.19161	-3.26748	0.00160135	0.999978	-1.60002	chr19	14937541	+	36610423		CTTTATCAATACCATATCCACAATATCTACCATACTCCCTAACATAATAC		II			NA	NA	NA	NA	NA	NA		OpenSea	TTTGTCTTTCAGTGGGCATTGCACTCGGAACATATTTTTGATAAACAATTTTTGCCTTAC[CG]TACTATGCCAGGGAGTATGGCAGATACTGTGGACATGGCACTGACAAAGACATGATGTCC	TTTGTCAGTGCCATGTCCACAGTATCTGCCATACTCCCTGGCATAGTACG			OR7A5;OR7A5	NM_017506;NM_017506	1stExon;3'UTR								0.896763	0.906456	0.00969249	550	826	1376
cg10965975	0.129862	-0.40945	3.07815	0.00285485	0.999978	-1.98305	chr14	101831160	-	74774380		TTTCTCACTCATCTATATTTTCTCCAATCCTTTCCAAATACATTTACCAC		II			NA	NA	NA	NA	NA	NA	chr14:101831291-101831695	N_Shore	TCATTGGCGCCTTTCTCACTCATCTGTATTTTCTCCAGTCCTTTCCAGATGCATTTGCCA[CG]GCCCTGTACAAGGGTTGGAAGGGGAGAGGGAGCCATAAATCATCTGCCCCACAGTCCTTA	TTCTCACTCATCTGTATTTTCTCCAGTCCTTTCCAGATGCATTTGCCACG									14:100900721-100900914				0.437503	0.416226	0.0212771	998	379	1377
cg13920824	0.289456	-3.49845	3.1449	0.00233433	0.999978	-1.84989	chr10	92631648	-	66621504		AACAAAACAAATAAATTTCTCCRAATCCCTAATCAACTAAAAATAAAAAC		II			NA	NA	NA	NA	NA	NA		OpenSea	TGGTAGATGAAAGCAAAGCAAGTAAGTTTCTCCGAATCCCTAGTCAACTGGAGGTAGAGA[CG]GACTGCGCAGGTTAACTACAGCTCCCAGCATGCCTGAGGGGCGGGCTCAGCGGCTGCGCA	GCAAAGCAAGTAAGTTTCTCCGAATCCCTAGTCAACTGGAGGTAGAGACG			RPP30;RPP30	NM_006413;NM_001104546	TSS200;TSS200				10:92621628-92622302	10:92630928-92632583	Promoter_Associated	TRUE	0.0894786	0.0740965	0.0153821	815	566	1381
cg10998878	-0.296175	-4.53552	-3.28569	0.00151302	0.999978	-1.56235	chr12	93964793	+	33647313	33636416	CAACTACAACAAAACTTAACAAAAATTAAACATCAATCCCAAAAACAACA	CGACTACGACGAAACTTAACAAAAATTAAACGTCGATCCCAAAAACAACG	I	A	Red	NA	NA	NA	NA	NA	NA	chr12:93963963-93967395	Island	TGACTGGGGAGGGAGGCGGGGAGCAAGGGAGGCGCGTCGGTCTGGGAAGTCGCGCGCACT[CG]CTGCTCCTGGGACCGACGTTTAACTCTTGCCAAGTCTCGTCGCAGCCGCCGCGGCTGGCG	CGCTGCTCCTGGGACCGACGTTTAACTCTTGCCAAGTCTCGTCGCAGCCG			SOCS2	NM_003877	5'UTR	high-CpG:92488880-92488971			12:92487904-92489324	12:93964465-93964880	Promoter_Associated		0.0395527	0.0483549	0.00880219	521	863	1384
cg19913626	-0.203774	3.5407	-3.24966	0.00169252	0.999978	-1.63677	chr8	49533357	+	37614352		ATATATAAAACCRAAATACTAACCCTAAACCTACCCAATCATACCTTCTC		II			NA	NA	NA	NA	NA	NA		OpenSea	CATAAATGGCTTTATGAAAACCATTTCTTACCGTGGTAGCAGATGAGATGAACAGCTGAC[CG]AGAAGGCATGACTGGGCAGGTCCAGGGTCAGCACTCCGGCCTCACATACTGCAGACGGGG	TATGTGAGGCCGGAGTGCTGACCCTGGACCTGCCCAGTCATGCCTTCTCG								TRUE	8:49695910-49696062				0.91605	0.926234	0.0101838	587	798	1385
cg24495044	0.262834	2.88541	3.09865	0.00268447	0.999978	-1.94237	chr10	134300809	+	60726360		ACRACTCTTCACCAACTAAAAATAAACCRTAAACTAAAACTCTCRTAAAC		II			rs7903563	0.44651	NA	NA	NA	NA	chr10:134304307-134304615	N_Shelf	GAAATCTGACTGAGGCCGGTGGACCGAGGCCTCCAGCTCAGGAGCAGCCCCGTGAAGTTG[CG]CCTACGAGAGTTTCAGTTCACGGTTTACCTCCAGCTGGTGAAGAGTCGCACCAGGTGTGG	CGCCTACGAGAGTTTCAGTTCACGGTTTACCTCCAGCTGGTGAAGAGTCG									10:134150229-134151146				0.884993	0.866296	0.0186973	937	448	1385
cg00140191	0.252463	-2.40571	3.09226	0.00273655	0.999978	-1.95508	chr6	35656242	-	14780461	46603317	CAAAACAAAACCTATCATCCCAAACAAAAAACAAAAACCCAATAAAAACA	CGAAACGAAACCTATCATCCCGAACGAAAAACAAAAACCCAATAAAAACG	I	A	Red	NA	NA	NA	NA	NA	NA	chr6:35655607-35656856	Island	AGAGACCGGAGGCGGAGCGGGACCTGTCATCCCGGGCGGGAAACAAAAGCCCAGTGAGGA[CG]GGCGGGCGCGACCCGCCTCGCCTCTGCCGGGAGAGGCCGGCGGGGGCGGAGAGCGGCGCC	CGGAGCGGGACCTGTCATCCCGGGCGGGAAACAAAAGCCCAGTGAGGACG			FKBP5;FKBP5;FKBP5;FKBP5	NM_004117;NM_001145775;NM_001145777;NM_001145776	5'UTR;5'UTR;5'UTR;5'UTR				6:35763563-35764834	6:35655414-35657286	Promoter_Associated		0.168569	0.149246	0.0193231	955	432	1387
cg01612425	-0.159023	-3.5314	-3.28626	0.00151029	0.999978	-1.56115	chr5	102455925	-	70669499		ACCTTAAAACCACRATCAAAAAAATTAAAACTAATCATTTAACTCTTACC		II			NA	NA	NA	NA	NA	NA	chr5:102455553-102455990	Island	TCCTTTGGGGAACCTTGGAACCACGGTCAGAAAGGTTAGGACTGATCATTTGGCTCTTGC[CG]GAAATCGTTCCGCCCGGTGAGGTTTCGGCGTGAGACCCGAGGAGGGCGGGGAAGAGGCGT	CGGCAAGAGCCAAATGATCAGTCCTAACCTTTCTGACCGTGGTTCCAAGG			GIN1	NM_017676	TSS200				5:102483314-102484375	5:102455334-102456510	Promoter_Associated	TRUE	0.0771662	0.0856549	0.00848871	517	872	1389
cg13721770	-0.214956	-2.5001	-3.09234	0.00273588	0.999978	-1.95492	chr6	112249160	-	68739401		AACAACTCCTTTACAATTCCRAAAAACTTAACAAAACCCTCTCATATCAC		II			NA	NA	NA	NA	NA	NA		OpenSea	GAAGTAACAGTAGCAACTCCTTTGCAGTTCCGAGGGGCTTAGCAAAGCCCTCTCATATCA[CG]ATATCATTTGATCTCCAGGACAATTATGAATGAAGTCACAAGAATAGGTGGTGGTGTTTT	CGTGATATGAGAGGGCTTTGCTAAGCCCCTCGGAACTGCAAAGGAGTTGC								TRUE					0.145235	0.164379	0.0191443	954	436	1390
cg00969893	-0.208208	2.48866	-3.11865	0.00252747	0.999978	-1.90251	chr15	63133069	+	33716463		TAAAAACAACATAATACTAACTTTTCTTTATTAATAACAATCCATAAAAC		II			NA	NA	NA	NA	NA	NA		OpenSea	CCCACAACTCCTCTGCCGCCTCCCCTCATGCCTCACCGTGTCTCAGGAGAGAGGGGTGCA[CG]TTTCATGGACTGTTACCAACAAAGAAAAGTCAGTATTATGTTGTTCTCAGACACTTTGGC	GAGAACAACATAATACTGACTTTTCTTTGTTGGTAACAGTCCATGAAACG			TLN2	NM_015059	3'UTR			TRUE					0.840819	0.857558	0.016739	882	510	1392
cg12665059	0.15858	1.89568	3.11214	0.0025776	0.999978	-1.9155	chr8	13787749	-	22639336		AAATCTCAACCACACTCCAATCAATTAATTATTTATTAAATTCTTCTTAC		II			rs17118033	0.094193	NA	NA	NA	NA		OpenSea	CATAGATAATGAGGTCTCAACCACACTCCAGTCAGTTAATTATTTATTGGATTCTTCTTA[CG]TGACAACCTCTTTTAAGAAATTAATTCAGGACAACAAATACCAAAGACTACCAATTTACA	GGTCTCAACCACACTCCAGTCAGTTAATTATTTATTGGATTCTTCTTACG								TRUE					0.793309	0.776211	0.0170985	894	498	1392
cg03980408	0.197561	2.97905	3.17593	0.00212372	0.999978	-1.78726	chr20	1371904	+	45646319		AAAAATAACCATTTACAATACTAAAATAAATAAACAATTCATTCAATTCC		II			NA	NA	NA	NA	NA	NA	chr20:1373259-1373917	N_Shore	GGGGTGCGGCAGAAGGCAGCTCCTCACGGCTTGAGTCCCAATCTTTGCCCCAGTTGGCTG[CG]GAACTGAATGAACTGCCCACTCACCCCAGCACTGTAAATGGTTACTCTCCTCATCCTTCC	AGAGTAACCATTTACAGTGCTGGGGTGAGTGGGCAGTTCATTCAGTTCCG			FKBP1A;FKBP1A	NM_054014;NM_000801	Body;Body								0.89097	0.87756	0.0134097	748	645	1393
cg14464827	-0.2211	2.44072	-3.09885	0.0026829	0.999978	-1.94198	chr2	188419933	-	63618488		AAATATCAACCAAAATCTCTACTATATATCCCTATCATTAAAATTCATCC		II			NA	NA	NA	NA	NA	NA		OpenSea	TAAATATTTACAGATGTCAACCAGAGTCTCTGCTGTATGTCCCTATCATTGAGGTTCATC[CG]TACTGTCTCTGTATTGGAATTATGGTCATATCAGACTAAGATCACTAGAGATCTAATAAA	CGGATGAACCTCAATGATAGGGACATACAGCAGAGACTCTGGTTGACATC			TFPI;TFPI	NM_001032281;NM_006287	TSS1500;TSS1500								0.835606	0.854117	0.0185107	936	457	1393
cg15770446	-0.165518	2.01335	-3.09084	0.00274828	0.999978	-1.9579	chr7	101754758	+	41792393	23617381	ACACCCCAACTTTATAACTACATATCACATCACAACAAATATACAACCCA	ACACCCCAACTTTATAACTACGTATCACATCACGACAAATATACAACCCG	I	T	Red	NA	NA	NA	NA	NA	NA		OpenSea	TTCAAGAACAAATTACATTTAGGATAACCTTCTACGCCAGTTACCACCCATCAAGCCCCA[CG]GGTTGCACACTTGCCGTGATGTGACACGCAGTTACAAAGTTGGGGTGTGGAAGCTGCGGG	CGGGTTGCACACTTGCCGTGATGTGACACGCAGTTACAAAGTTGGGGTGT			CUX1;CUX1;CUX1	NM_181500;NM_181552;NM_001913	Body;Body;Body			TRUE	7:101541478-101541681				0.793234	0.812536	0.0193016	964	433	1397
cg22325646	-0.126027	-3.32549	-3.31053	0.00139985	0.999978	-1.51071	chr17	41176469	+	56644334		AACTAAACCCAAAAATCAAACTTAATTAAAAATCTAACAATAAACCRAAC		II			NA	NA	NA	NA	NA	NA	chr17:41176670-41176966	N_Shore	ACCTCTTGATCCGCCCGCCTCGGCCTCCCAAAGTGCTGGTATTACAGGCGTGAGCCACCG[CG]CCCGGCCTATTGTCAGACTCTTAATCAAGCCTGACTTTTGGGTTTAGCTCTGGCTCCAGC	CGCCCGGCCTATTGTCAGACTCTTAATCAAGCCTGACTTTTGGGTTTAGC		TRUE	RND2	NM_005440	TSS1500					17:41176389-41178069	Unclassified		0.0884386	0.0957824	0.00734372	479	920	1399
cg13967414	0.118646	2.39327	3.24981	0.00169175	0.999978	-1.63647	chr10	3991131	+	46782450	47699498	CAAAACCCAAAACTTTTCAATTACTCCCTCCAAATCACAAAACTAACCCA	CGAAACCCAAAACTTTTCAATTACTCCCTCCAAATCACAAAACTAACCCG	I	A	Red	NA	NA	NA	NA	NA	NA		OpenSea	GTATGTGTGGTACTCAGGGCTCCCGGCAGCCCGAAGCCAGAGTGTGTCCTCACCCTGCCC[CG]GGTCAGCCCTGTGACCTGGAGGGAGCAACTGAAAAGCTCTGGGCCTCGGATTCCTCATCT	CGAGGCCCAGAGCTTTTCAGTTGCTCCCTCCAGGTCACAGGGCTGACCCG								TRUE		10:3991060-3991519	Unclassified_Cell_type_specific		0.843171	0.833296	0.00987553	585	816	1401
cg16718263	0.264251	-2.80939	3.12886	0.0024506	0.999978	-1.88207	chr15	96596349	+	63626353	67657481	CTAAAAAAAATTAACCAATAACTTACCCTCTAACCCCACCATAAAAAACA	CTAAAAAAAATTAACCGATAACTTACCCTCTAACCCCGCCGTAAAAAACG	I	A	Red	NA	NA	NA	NA	NA	NA		OpenSea	CGTGGAAGGTGCCTGGACACGGGCTCAGCCGCAGGGGCCCCTAGTACCTCCATCGGGTCT[CG]TCCCCCACGGCGGGGTCAGAGGGCAAGTCACCGGCCAACCTCCTCCAGGAGCTCTGTTTA	CGTCCCCCACGGCGGGGTCAGAGGGCAAGTCACCGGCCAACCTCCTCCAG								TRUE	15:94397181-94397483	15:96596277-96596415	Unclassified_Cell_type_specific		0.133401	0.117602	0.0157993	853	548	1401
cg16710224	-0.266334	3.00539	-3.10834	0.00260728	0.999978	-1.92307	chr16	79381643	-	34797448		ATCCAAAAAAATTAAACTAACAAATAAATTCCAACTCTATAACACAACCC		II			NA	NA	NA	NA	NA	NA		OpenSea	CCATTATCAAGGTCCAGAGGGGTTGAACTGGCAGGTGGATTCCAGCTCTGTGGCACAACC[CG]GGCCAAGAGCTCAGGGATCTCCTAACTCCTGTCTTAGGTACCAAGTCACCGGTCATGTTA	TCCAGAGGGGTTGAACTGGCAGGTGGATTCCAGCTCTGTGGCACAACCCG									16:77938831-77939145				0.880406	0.897589	0.0171829	907	495	1402
cg06655861	0.144323	1.31202	3.07822	0.00285425	0.999978	-1.98292	chr16	87657992	-	44786460		CTAATAACCRAAACTCCATTTTCTATCTTTATAAATTTACTACTCCTAAC		II			NA	NA	NA	NA	NA	NA		OpenSea	GCTCCCCACCCCTGGTGACCGAGACTCCATTTTCTGTCTTTGTGGGTTTGCTGCTCCTGA[CG]TTTCGCATGCGTGGAGTCATACGCTGAGAGGCCTTTTGTGTGTCGCTTCTGTTGCCCAGC	CGTCAGGAGCAGCAAACCCACAAAGACAGAAAATGGAGTCTCGGTCACCA			JPH3	NM_020655	Body				16:86215493-86215609				0.71941	0.699205	0.0202055	996	406	1402
cg13387826	0.114484	2.83013	3.2949	0.00147007	0.999978	-1.54323	chr1	2005260	+	41743356	40694380	ACAAAAAAACATCTTCCTTCCCATTAACAAACTAATACTACATCAACTCA	ACAAAAAAACATCTTCCTTCCCGTTAACGAACTAATACTACGTCGACTCG	I	C	Grn	NA	NA	NA	NA	NA	NA	chr1:2005179-2005565	Island	CTTCCGTTAAATATCTGCTCCTCGCGCTCGAGCCTCCCTGCCTATTGTCGGGGCCGGAGG[CG]AGCCGACGCAGCATCAGCTCGTCAACGGGAAGGAAGATGCCTCCCTGCACGCCCGCCGCG	GCAGGGAGGCATCTTCCTTCCCGTTGACGAGCTGATGCTGCGTCGGCTCG			PRKCZ;PRKCZ;PRKCZ	NM_001033581;NM_002744;NM_001033581	1stExon;Body;5'UTR				1:1994363-1996075			TRUE	0.879204	0.871292	0.00791228	507	896	1403
[truncated: 205 more rows]

## Sheet: Supp. Table 1b
Supplementary Table 1b: Top 1000 probes in buccal in female offspring
[truncated: 1,001 more rows]

## Sheet: Supp. Table 2a
Supplementary Table 2a: Top 1000 probes in placenta of male offspring
[truncated: 1,001 more rows]

## Sheet: Supp. Table 2b
Supplementary Table 2b: Top 1000 probes in placenta of female offspring
[truncated: 1,001 more rows]
